# Supplementary material for: Virtual mapping and analytical data integration: A teaching module using Precambrian crystalline basement in Colorado's Front Range (USA)
Source: Copernicus journal article supplement (doi:10.5194/gc-2021-9), 2021-05-05
Supplement: Supplementary file 1 [file GG1.docx]

**GG1**

**Lithology:** Bt-granodiorite.

**General structure:** The granodiorite is protomylonitic here with a well-developed stretching lineation defined by smeared quartz and feldspar. On the near horizontal outcrop surface, a 2 cm-wide pegmatite vein is asymetrically pulled apart (boudinage) indicating left-lateral (sinistral) sense of displacement. If you assume that displacement was parallel to the stretching lineation, then that would also require a reverse-sense dip-slip component of displacement (Southeast side-up). This shear sense is clear and so assigned high confidence (5 on a scale of 1 to 5).


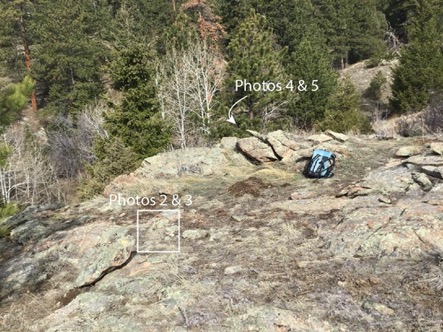

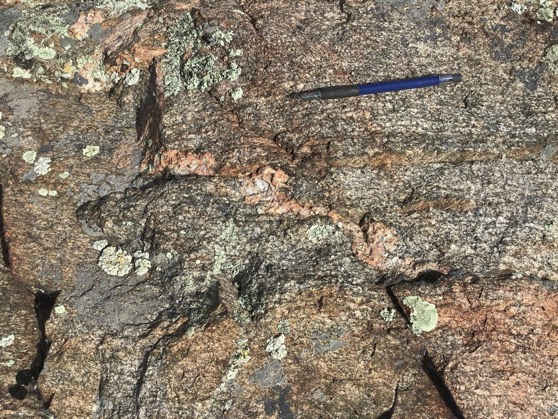
**Measurements:** Mylonitic foliation strike, dip is 059,64. The stretching lineation plunge -> trend is 58-> 209.

***Photo 1.*** Subhorizontal outcrop surface. Looking W. Photos 4/5 are on subvertical face over far edge of out­crop.


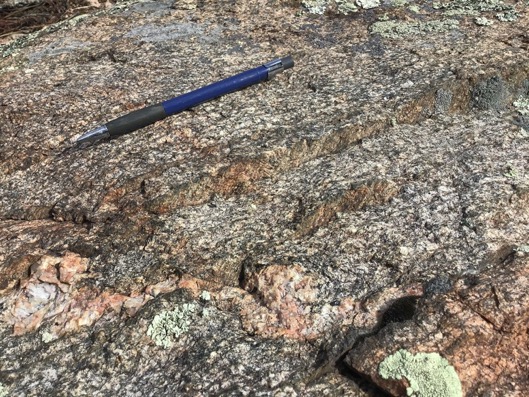

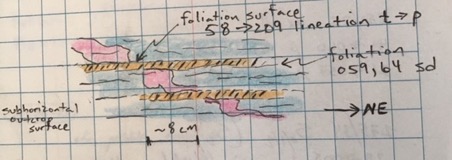
***Photo 2.*** On near horizontal surface, a 2 cm-wide pegma­tite vein is asymetrically pulled apart indicating left-lateral (sinistral) sense of displacement. This also requires a SE side-up dip-slip component.

Field sketch of sheared pegmatite

***Photo 3.*** Close-up of same. Note two descrete slip surfaces

where the oblique stretching lineation is visible.


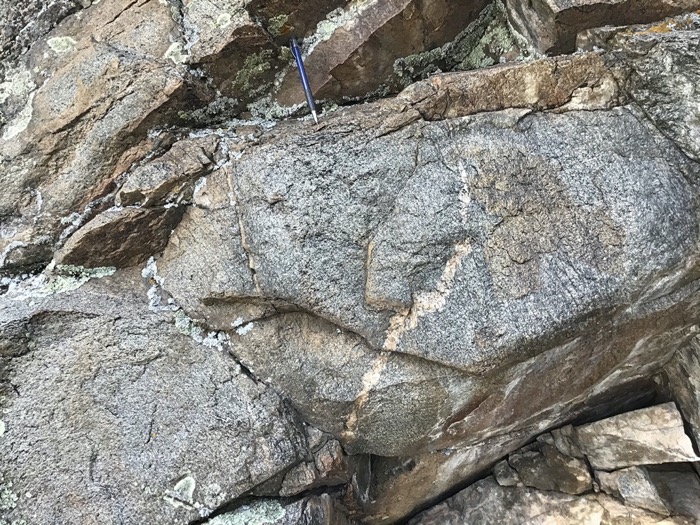
***Photo 4.*** Subvertical outcrop face where another small pegmatite vein appears incrementally displaced across the foliation. Sense of shear is south-side-up. Stretching lineation is parallel to the oriented pencil, so this face is near perpendicular to the mylonitic foliation and parallel to the stretching lineation. For plane strain simple shear, this is referred to as the kinematic plane.


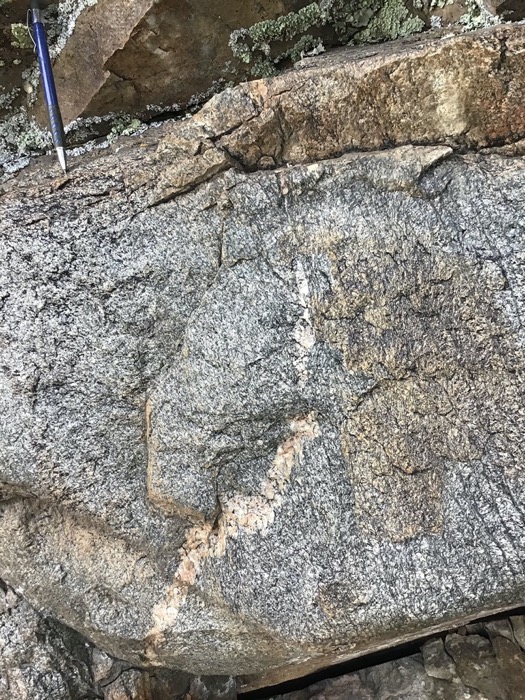

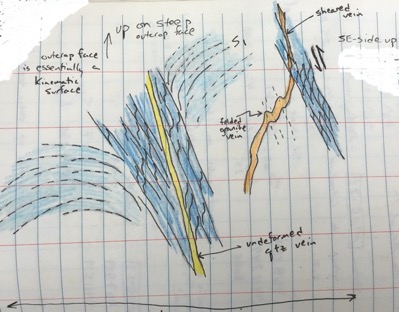


Field sketch of Photo 4. The curving foliation indicated by the dashes and labeled S1 is an older fabric that may be magmatic.

***Photo 5.*** Left. A closer view of the sheared pegmatite in Photo 4 (orange in the sketch).
