# Supplementary material for: Virtual mapping and analytical data integration: A teaching module using Precambrian crystalline basement in Colorado's Front Range (USA)
Source: Copernicus journal article supplement (doi:10.5194/gc-2021-9), 2021-05-05

# Golden Gate map from 110 stations -May 28, 2020

with foliation, bedding, station polygons

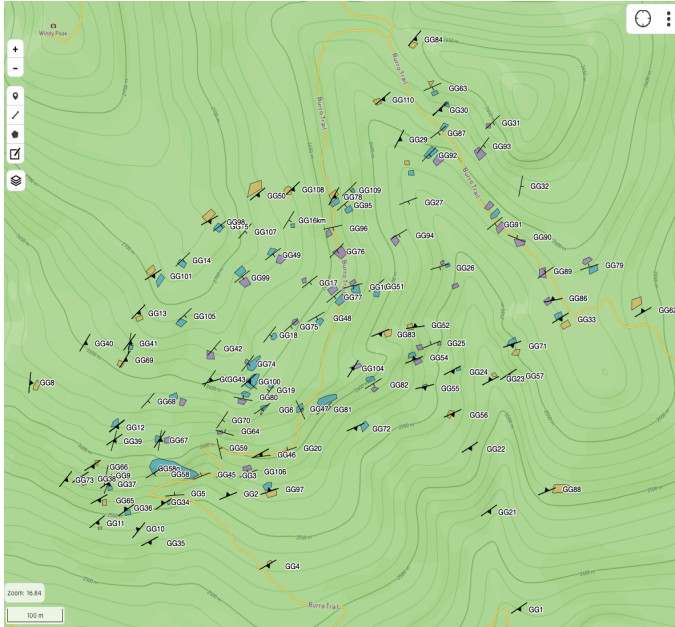

with contacts and station polygons

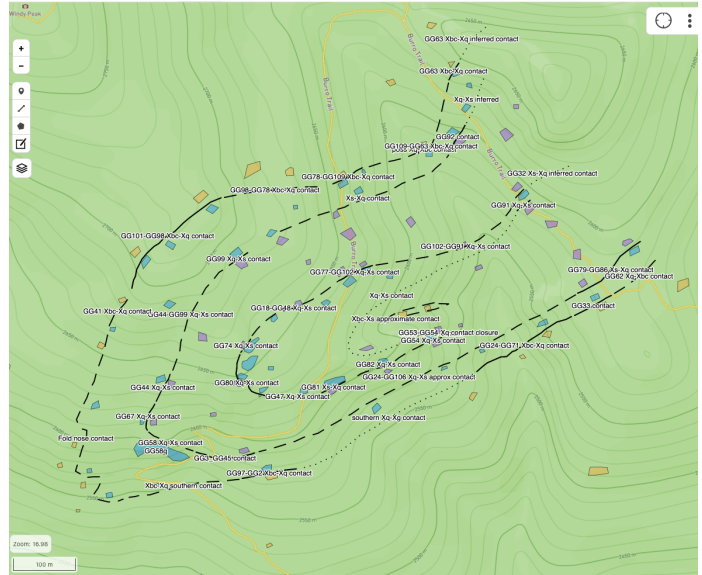

Station polygons, major units, fold hinges

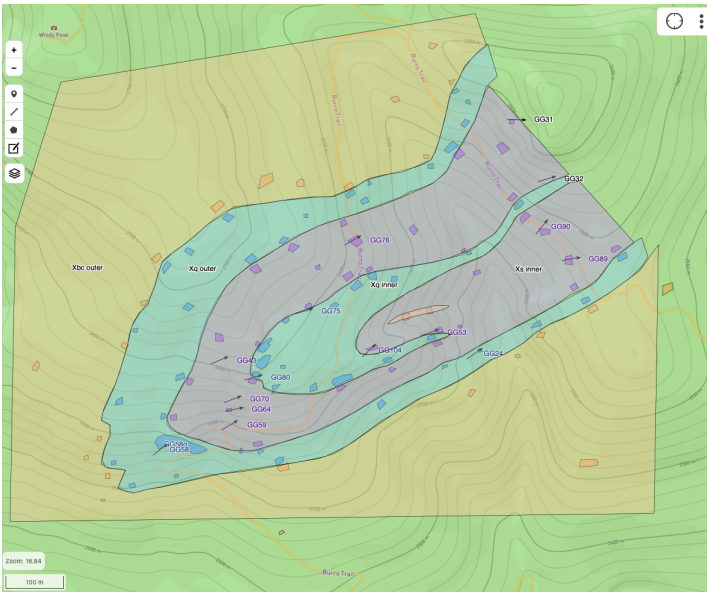

All data including fold hinges, lineations

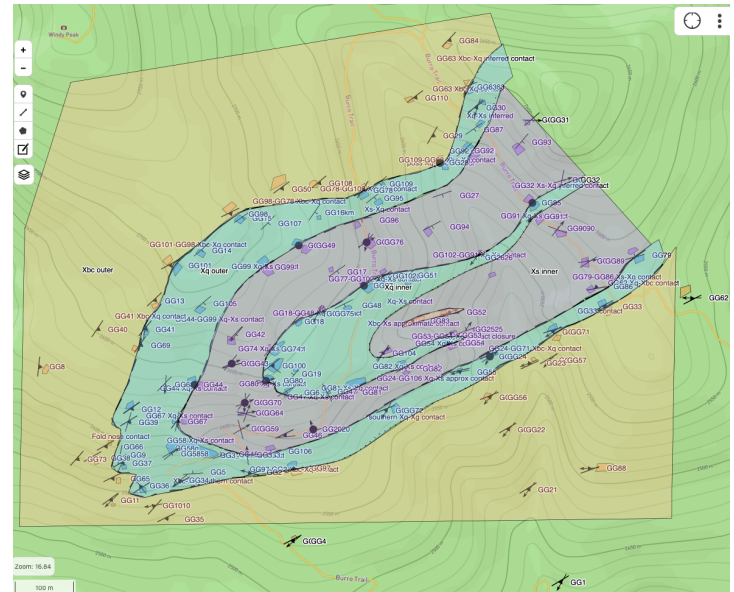

# Golden Gate structural data from 110 stations

bedding+bedding parallel foliation (S0/S1), great circles, n=71

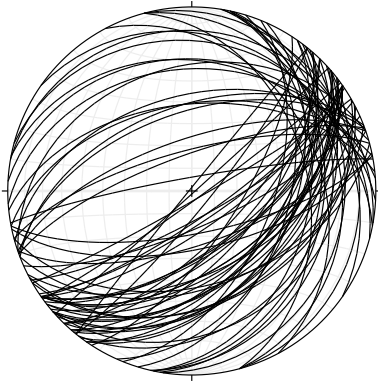

bedding+bedding parallel foliation (S0/S1), poles, n=71

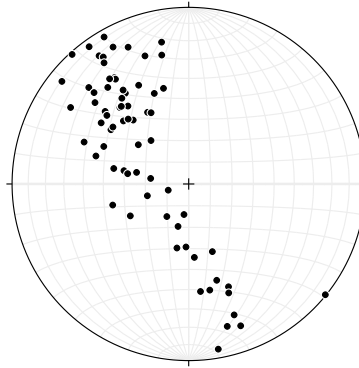

L1 mineral and stretching lineations, n=16

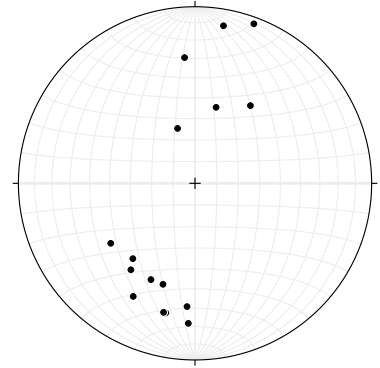

non-mylonitic foliation (S2) in quartzite and schist, great circles, n=17

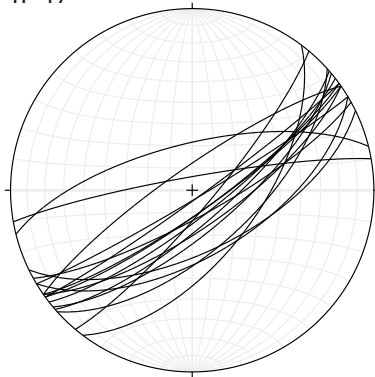

non-mylonitic foliation in granodiorite (S1 or S2, probably combo), great circles, n=20

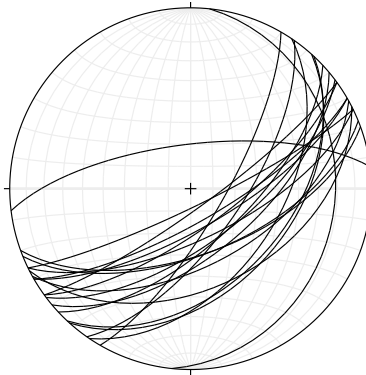

Outcrop scale F2 fold axial planes (great circles, n=16) and fold hinges (n=19)

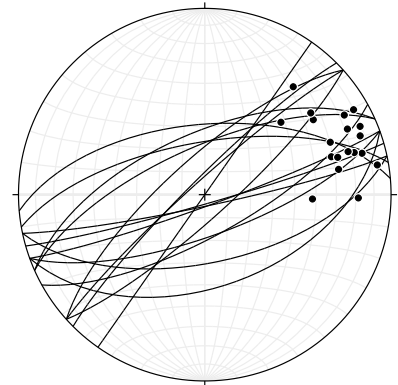

Mylonitic foliation (great circles, n=24) and lineations (n=21)

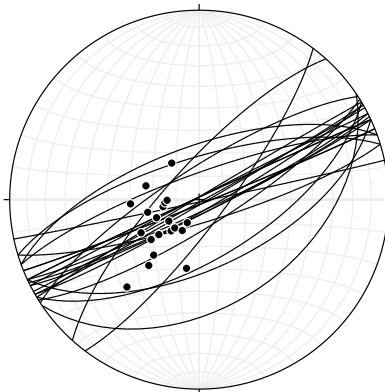

Supplement: Supplementary file 1 [file GGmapsstereonetsummaries.pdf › Supplement Materials described in Appendix A1/GGmapsstereonetsummaries.pdf]
