# Supplementary material for: Virtual mapping and analytical data integration: A teaching module using Precambrian crystalline basement in Colorado's Front Range (USA)
Source: Copernicus journal article supplement (doi:10.5194/gc-2021-9), 2021-05-05
Supplement: Supplementary file 2 [file GG10.docx]

**GG10**

**Lithology:** Quartzite

**General structure:**  Light gray quartzite with strongly developed penetrative foliation - mylonitic. A prominent penetrative foliation is the most obvious structure, and a strong lineation is defined by align­ment of white mica flakes and streaks of slightly different shaded quartz.

**Measurements:** The mylonitic foliation strike, dip is 222,76. The lineation plunge -> trend is 74 -> 260.
