# Supplementary material for: Virtual mapping and analytical data integration: A teaching module using Precambrian crystalline basement in Colorado's Front Range (USA)
Source: Copernicus journal article supplement (doi:10.5194/gc-2021-9), 2021-05-05
Supplement: Supplementary file 3 [file GG100.docx]

**GG100**

**Lithology:** Quartzite.

**General structure:** This quartzite has a prominant layering defined by cm-scale bands of slightly lighter and darker shades of white, gray, and bluish gray that could be interpreted to represent bedding. Some layers show the trace of a steeply dipping penetrative foliation defined by white mica flakes and wispy alternating layers of slightly differently colored quartz.

**Measurements:** The bedding has typical strike,dip 305,18. The steeper foliation strike, dip is 052,78.


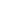


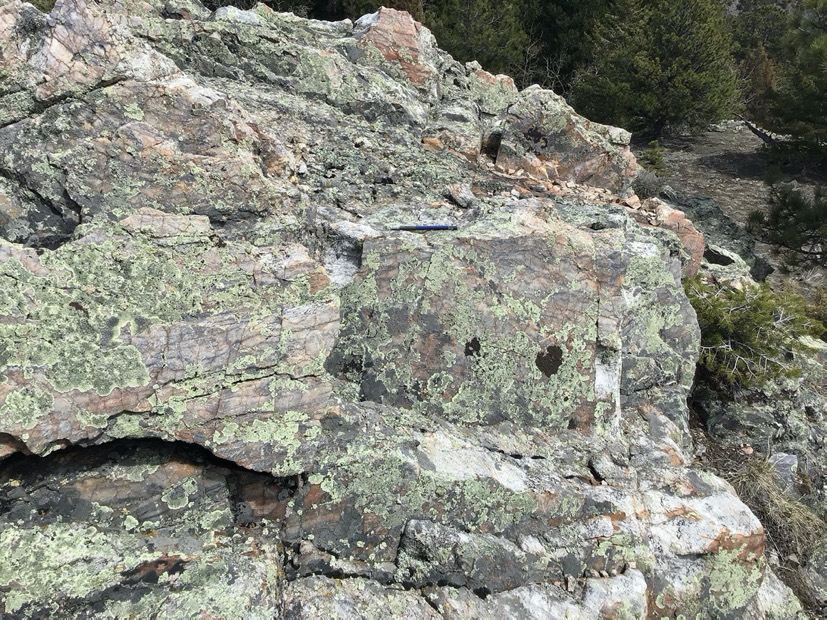


**Photo 1.** This view is looking Northeast. Note the trace of the shallow bedding/layering. Pencil for scale.
