# Supplementary material for: Virtual mapping and analytical data integration: A teaching module using Precambrian crystalline basement in Colorado's Front Range (USA)
Source: Copernicus journal article supplement (doi:10.5194/gc-2021-9), 2021-05-05
Supplement: Supplementary file 4 [file GG101.docx]

**GG101**

**Lithology:** Bt-granodiorite, adjacent to quartzite.

**General structure:** This granodiorite is weakly foliated. Less than 5 meters to the East is quartzite

outcrop, indicating a **mappable contact**.

**Measurements:** The foliation in the granodiorite has strike,dip of 061,55.
