# Supplementary material for: Virtual mapping and analytical data integration: A teaching module using Precambrian crystalline basement in Colorado's Front Range (USA)
Source: Copernicus journal article supplement (doi:10.5194/gc-2021-9), 2021-05-05
Supplement: Supplementary file 5 [file GG102.docx]

**GG102**

**Lithology:** Schist, in contact with quartzite.

**General structure:** This outcrop is mostly Garnet-andalusite-biotite-muscovite schist (with abundant 1-5 cm thick layers of light gray to brown quartzite). However, a **possibly mappable contact** between schist to the NW and quartzite to the SE is also exposed here and is conformable with the prominent layering in the schist. The compositional layers in the schist appear to be relict bedding, but the parallel schistosity in the mica-rich layers is penetrative and so likely a tectonic foliation. A mineral lineation defined by white mica is developed on the foliation surface.

**Measurements:** The bedding/schistosity strike,dip 078,64. The mineral lineation has a plunge -> trend of 41 -> 235.
