# Supplementary material for: Virtual mapping and analytical data integration: A teaching module using Precambrian crystalline basement in Colorado's Front Range (USA)
Source: Copernicus journal article supplement (doi:10.5194/gc-2021-9), 2021-05-05
Supplement: Supplementary file 6 [file GG103.docx]

**GG103**

**Lithology:** Bt-granodiorite.

**General structure:** The granodiorite is mylonitic here.

**Measurements:** The mylonitic foliation has strike,dip 056,43.


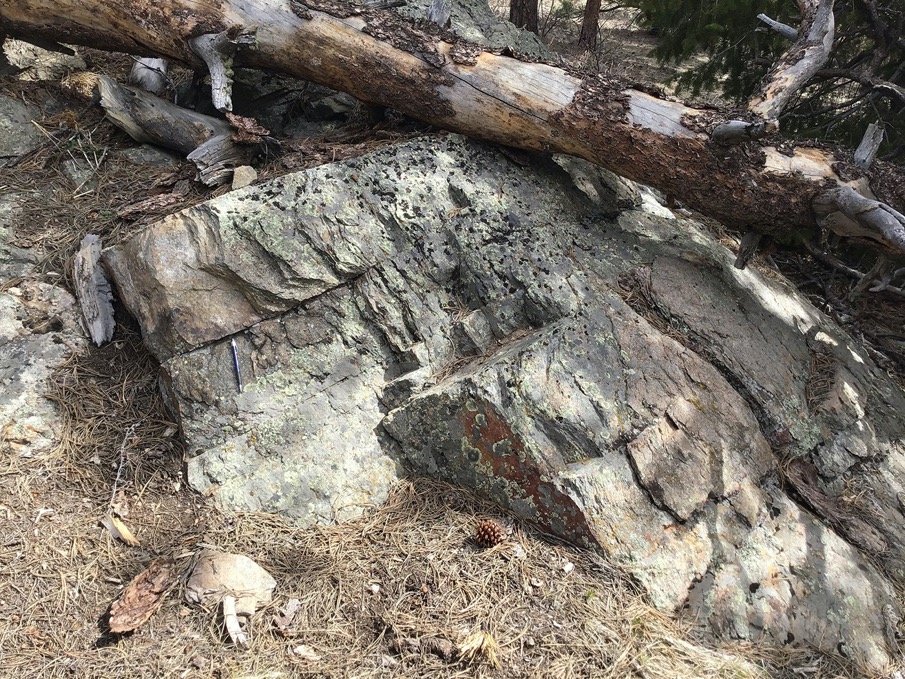


**Photo 1.**Outcrop GG103. Looking North. The pencil is oriented parallel to the nearly downdip stretching lineation.
