# Supplementary material for: Virtual mapping and analytical data integration: A teaching module using Precambrian crystalline basement in Colorado's Front Range (USA)
Source: Copernicus journal article supplement (doi:10.5194/gc-2021-9), 2021-05-05
Supplement: Supplementary file 7 [file GG104.docx]

**GG104**

**Lithology:** Schist.

**General structure:** The steeply dipping schist here has abundant 1-5 cm thick layers of light gray to brown quartzite alternating with schist, which probably represents a relict bedding. But the parallel schistosity in the mica-rich layers is penetrative and so likely a tectonic foliation. This is also supported by the common presence of isoclinally folded and dismembered lenses of quartzite and quartz veins (photo).

**Measurements:** The bedding/schistosity (and axial surface of isoclinal folds) has strike,dip 035,90. The hinge of a folded quartzite layer has plunge -> trend of 43 -> 046.


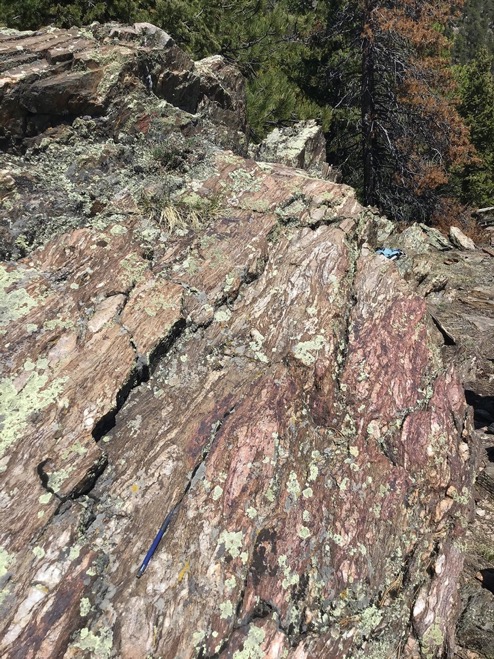


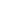


**Photo 1.** Left. This view is looking Northeast and obliquely down onto a subhorizontal surface. Pencil in foreground for scale.


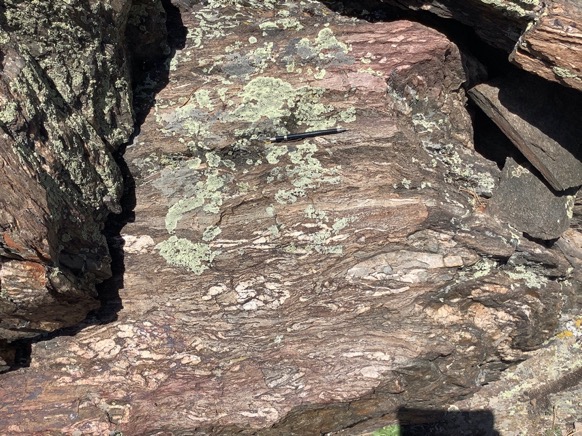
**Photo 2.** Bottom. A close view looking down on a subhorizontal surface. NE is to the right. Note the numerous folds and discontinuous lenses of quartzite and quartz. Pencil for scale.
