# Supplementary material for: Virtual mapping and analytical data integration: A teaching module using Precambrian crystalline basement in Colorado's Front Range (USA)
Source: Copernicus journal article supplement (doi:10.5194/gc-2021-9), 2021-05-05
Supplement: Supplementary file 8 [file GG105.docx]

**GG105**

**Lithology:** Quartzite.

**General structure:** This light gray quartzite has a prominent layering defined by cm-scale bands of slightly lighter and darker shades of gray that could be interpreted to represent bedding.

**Measurements:** The bedding strike, dip is 050,61.
