# Supplementary material for: Virtual mapping and analytical data integration: A teaching module using Precambrian crystalline basement in Colorado's Front Range (USA)
Source: Copernicus journal article supplement (doi:10.5194/gc-2021-9), 2021-05-05
Supplement: Supplementary file 11 [file GG108.docx]

**GG108**

**Lithology:** Bt-granodiorite

**General structure:** This outcrop of granodiorite has a weak foliation defined by biotite alignment. There are several large (m-scale) blocks of rock here, and they all appear to be similarly oriented in terms of the foliation. But they all appear to have shifted somewhat, so no measurements were taken.

**Measurements:** The foliation has strike,dip of 050,60.


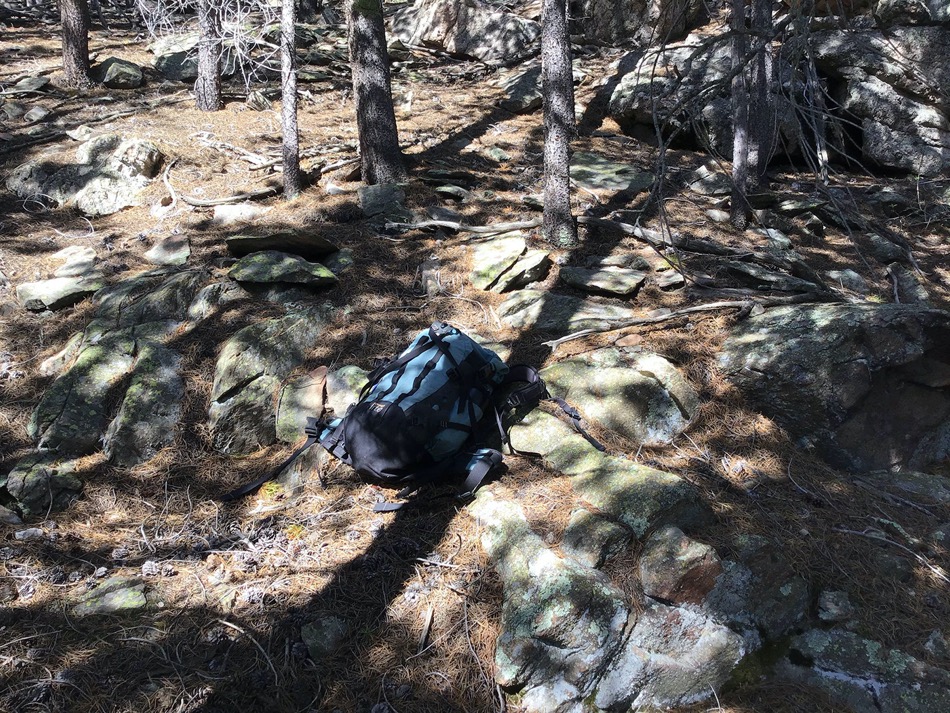


**Photo 1.** Looking Southwest at outcrops in the foreground of Bt-granodiorite. The larger outcrops in the background are a coarse foliated pegmatite.
