# Supplementary material for: Virtual mapping and analytical data integration: A teaching module using Precambrian crystalline basement in Colorado's Front Range (USA)
Source: Copernicus journal article supplement (doi:10.5194/gc-2021-9), 2021-05-05
Supplement: Supplementary file 12 [file GG109.docx]

**GG109**

**Lithology:** Quartzite.

**General structure:** This quartzite has a prominant layering defined by cm-scale bands of slightly lighter and darker shades of white, gray, and bluish gray that could be interpreted to represent bedding. But there are also aligned mica flakes parallel to the layering suggesting that it may also be a tectonic foliation.

**Measurements:** The bedding/foliation has typical strike,dip 049,49.


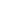


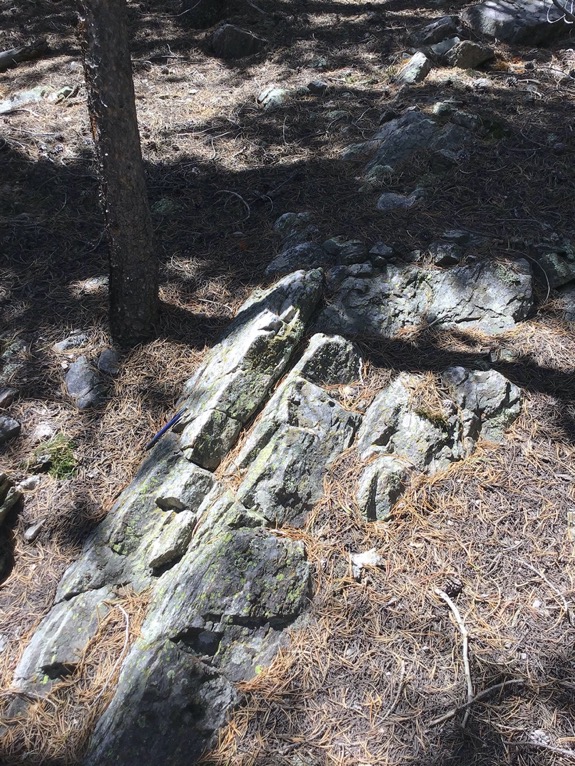


**Photo 1.** This view is looking down and SW is towards top of photo. Pencil for scale.
