# Supplementary material for: Virtual mapping and analytical data integration: A teaching module using Precambrian crystalline basement in Colorado's Front Range (USA)
Source: Copernicus journal article supplement (doi:10.5194/gc-2021-9), 2021-05-05
Supplement: Supplementary file 13 [file GG11.docx]

**GG11**

**Lithology:** Bt-granodiorite

**General structure:** This outcrop of granodiorite a moderately developed foliation defined by biotite alignment. The foliation is not mylonitic in that there are not abundant tails of recrystallized material around phenocrysts. There is a weak mica alignment on the foliation surface defining a mineral lineation.

**Measurements:** The foliation strike, dip is 054,81. The lineation has a plunge -> trend of 64 -> 225.
