# Supplementary material for: Virtual mapping and analytical data integration: A teaching module using Precambrian crystalline basement in Colorado's Front Range (USA)
Source: Copernicus journal article supplement (doi:10.5194/gc-2021-9), 2021-05-05
Supplement: Supplementary file 14 [file GG110.docx]

**GG110**

**Lithology:** Bt-granodiorite

**General structure:** This outcrop of granodiorite has a weak foliation defined by biotite alignment. There are local veins of pink pegmatite.

**Measurements:** The foliation has strike,dip of 053,65.


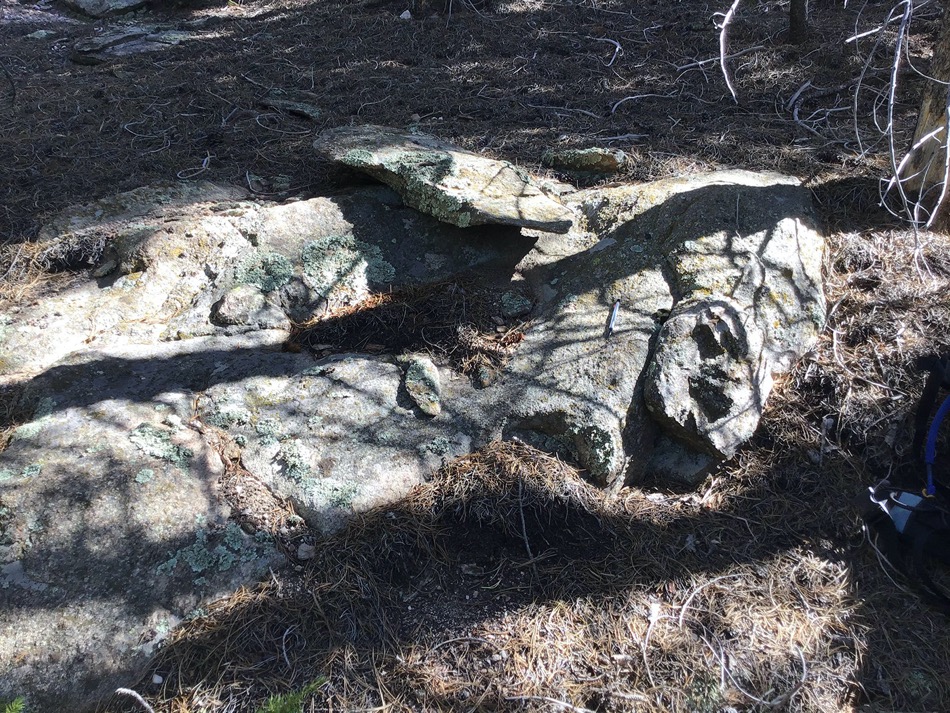


**Photo 1.** Looking Northeast at outcrops of Bt-granodiorite. The pencil is aligned with the trace of the foliation.
