# Supplementary material for: Virtual mapping and analytical data integration: A teaching module using Precambrian crystalline basement in Colorado's Front Range (USA)
Source: Copernicus journal article supplement (doi:10.5194/gc-2021-9), 2021-05-05
Supplement: Supplementary file 15 [file GG12.docx]

**GG12**

**Lithology:** Quartzite.

**General structure:** This light gray quartzite has a prominent layering defined by cm-scale bands of slightly lighter and darker shades of white, gray, and bluish gray that could be interpreted to represent bedding. Some layers show the trace of a steeply dipping penetrative foliation defined by white mica flakes and wispy alternating layers of slightly variably colored quartz (photo). Local quartz-pebble conglomeratic horizons are common and also abundant in float (photo).

**Measurements:** The bedding strike, dip is 055,55. The steeper foliation strike, dip is 55,80.


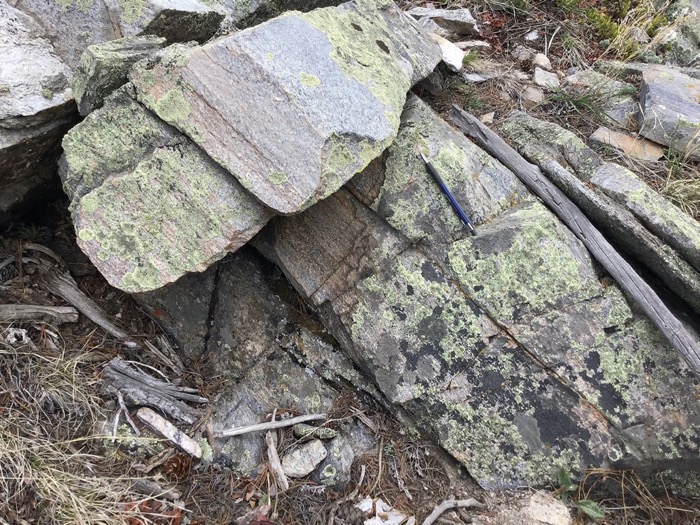


**Photo 1.** Outcrop view looking NE. Pencil aligned close to parallel to bedding. Photo 2 taken in upper left on lichen-free face.


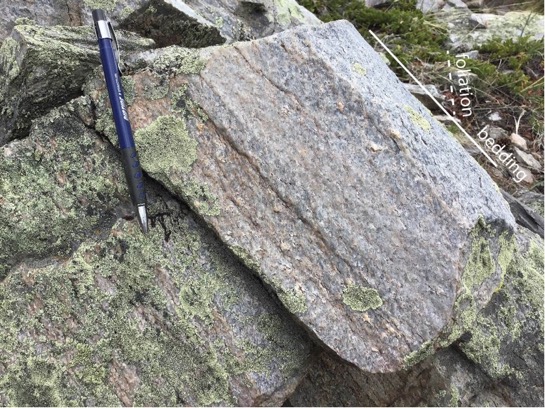

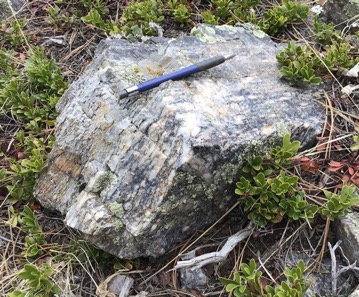
**Photo 2.** Left. Closer view of outcrop with pencil aligned parallel to foliation that is oblique to bedding. Viewlooking NE.

**Photo 3.** Quartz pebble conglomeratic float.
