# Supplementary material for: Virtual mapping and analytical data integration: A teaching module using Precambrian crystalline basement in Colorado's Front Range (USA)
Source: Copernicus journal article supplement (doi:10.5194/gc-2021-9), 2021-05-05
Supplement: Supplementary file 16 [file GG13.docx]

**GG13**

**Lithology:** Bt-granodiorite

**General structure:** This outcrop of granodiorite a moderately developed foliation defined by biotite alignment. The foliation is not mylonitic in that there are not abundant tails of recrystallized material around phenocrysts.

**Measurements:** The foliation strike, dip is 047,65.
