# Supplementary material for: Virtual mapping and analytical data integration: A teaching module using Precambrian crystalline basement in Colorado's Front Range (USA)
Source: Copernicus journal article supplement (doi:10.5194/gc-2021-9), 2021-05-05
Supplement: Supplementary file 17 [file GG14.docx]

**GG14**

**Lithology:** Quartzite.

**General structure:** This quartzite has a prominent layering defined by cm-scale bands of slightly lighter and darker shades of white, gray, and bluish gray that could be interpreted to represent bedding. But there are also aligned mica flakes parallel to the layering suggesting that it may also be a tectonic foliation. Some outcrops also display local horizons of quartz-pebble conglomeratic horizons that are as thick as 20 cm. The pebbles in these layers are notably flattened and/or stretched, also suggesting that the layering is a combination of bedding and foliation.

**
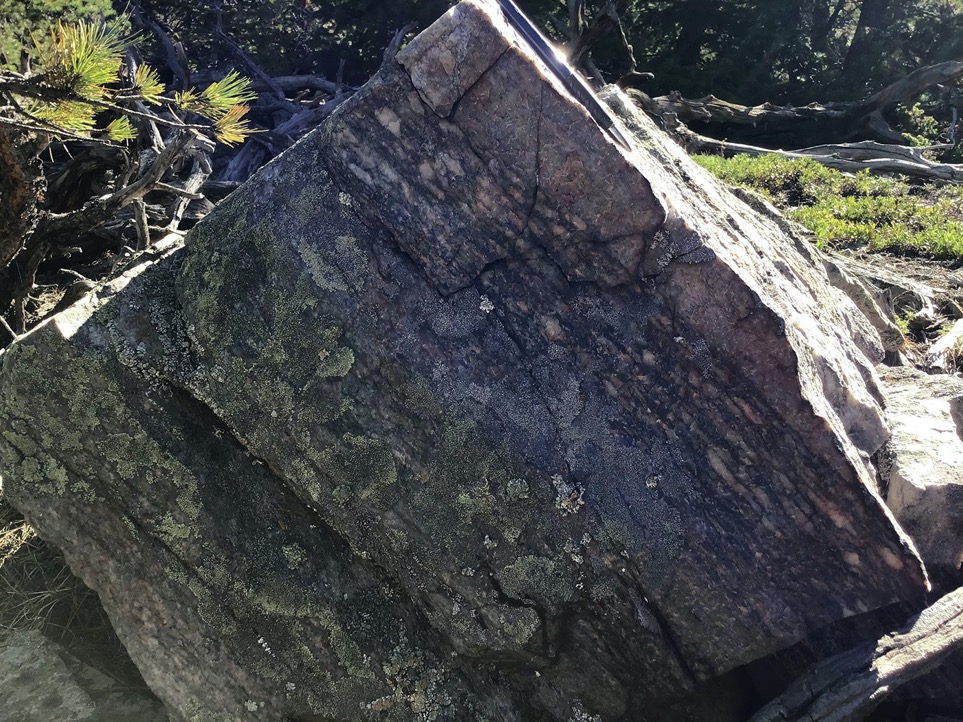
Measurements:** The layering/bedding has strike,dip of 049,40.

**Photo 1.** Looking NE, at an exposure with a prominent 20 cm thick layer of dark gray quartzite with abundant white quartz pebbles. The pebbles are flattened parallel to the overall layering. The pencil at top-center is oriented downdip on the layering surface.
