# Supplementary material for: Virtual mapping and analytical data integration: A teaching module using Precambrian crystalline basement in Colorado's Front Range (USA)
Source: Copernicus journal article supplement (doi:10.5194/gc-2021-9), 2021-05-05
Supplement: Supplementary file 18 [file GG15.docx]

**GG15**

**Lithology:** Quartzite.

**General structure:** This quartzite has a prominant layering defined by cm-scale bands of slightly lighter and darker shades of white, gray, and bluish gray that could be interpreted to represent bedding. But there are also aligned mica flakes parallel to the layering suggesting that it may also be a tectonic foliation. Local quartz-pebble conglomeratic horizons are common and also abundant in float.

**Measurements:** The bedding has a strike, dip of 055,63.

**
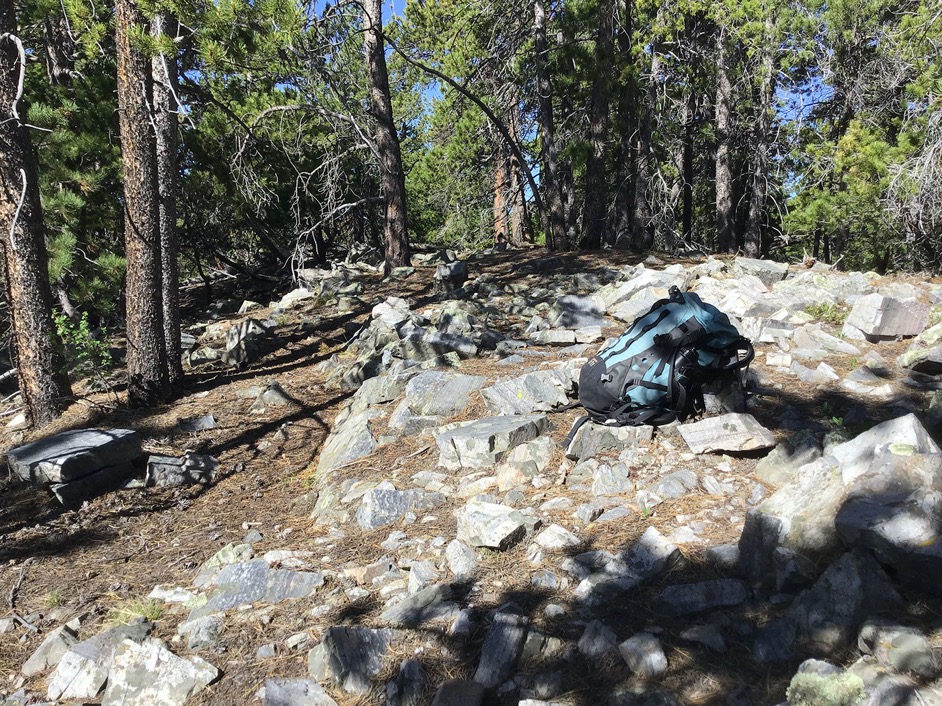
**

**Photo 1.** Looking SW at scattered crops of quartzite.
