# Supplementary material for: Virtual mapping and analytical data integration: A teaching module using Precambrian crystalline basement in Colorado's Front Range (USA)
Source: Copernicus journal article supplement (doi:10.5194/gc-2021-9), 2021-05-05

**GG17**

**Lithology:** Schist

**General structure:** The compositional layers in this Bt-Ms schist appear to be relict bedding, but the parallel schistosity in the mica-rich layers is penetrative and so likely a tectonic foliation.

**Measurements:** The bedding/schistosity has typical strike,dip 055,78.


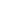

Supplement: Supplementary file 20 [file GG17.docx]
