# Supplementary material for: Virtual mapping and analytical data integration: A teaching module using Precambrian crystalline basement in Colorado's Front Range (USA)
Source: Copernicus journal article supplement (doi:10.5194/gc-2021-9), 2021-05-05
Supplement: Supplementary file 21 [file GG18.docx]

**GG18**

**Lithology:** Quartzite.

**General structure:** This quartzite has a layering defined by cm-scale bands of slightly lighter and darker shades of white, gray, and bluish gray that could be interpreted to represent bedding.

**Measurements:** The layering/bedding has strike,dip of 041,60.

**
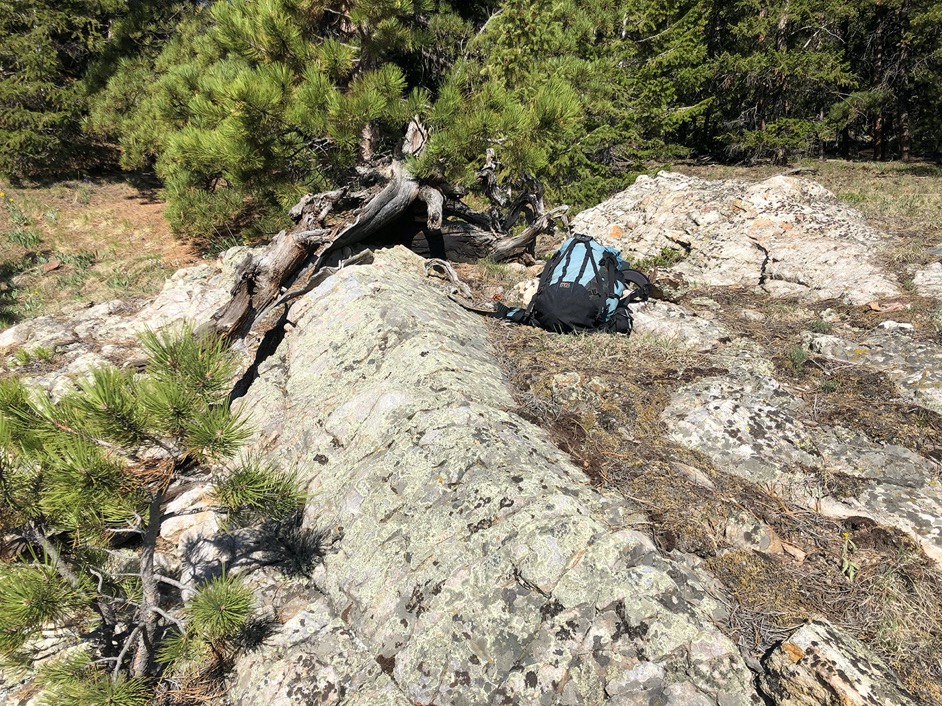
**

**Photo 1.** Looking West at outcrop GG18. The bedding dips to the left.
