# Supplementary material for: Virtual mapping and analytical data integration: A teaching module using Precambrian crystalline basement in Colorado's Front Range (USA)
Source: Copernicus journal article supplement (doi:10.5194/gc-2021-9), 2021-05-05
Supplement: Supplementary file 22 [file GG19.docx]

**GG19**

**Lithology:** Quartzite.

**General structure:** This quartzite has a prominent layering defined by cm-scale bands of slightly lighter and darker shades of white and gray, and by 1-2 cm thick layers with slightly more mica.

**Measurements:** The layering has strike,dip of 219,89.
