# Supplementary material for: Virtual mapping and analytical data integration: A teaching module using Precambrian crystalline basement in Colorado's Front Range (USA)
Source: Copernicus journal article supplement (doi:10.5194/gc-2021-9), 2021-05-05
Supplement: Supplementary file 23 [file GG2.docx]

**GG2**

**Lithology:** Quartzite.

**General structure:** Light gray quartzite with strongly developed penetrative foliation - mylonitic. A prominent penetrative foliation is the most obvious structure, and a strong lineation is defined by alignment of white mica flakes and streaks of slightly different shaded quartz. A small

shear band provides evidence for high confidence (5 on scale of 1-5) **NE-side-up shear sense** (Photo 3).

**
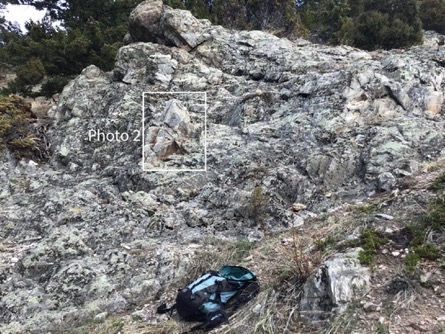
**
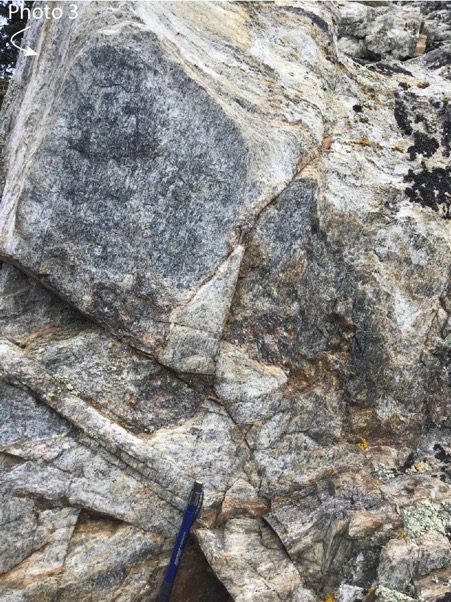
**Measurements:** Mylonitic foliation strike, dip is 250,67. The lineation plunge -> trend is 66 -> 285.

**Photo 1.** Above. Quartzite mylonite outcrop.

Looking N. Photos 2 and 3 taken from near

middle of outcrop.

**
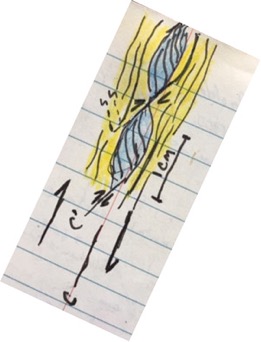
Photo 2.** Right. Foliation surface showing stretching lineation (parallel to pencil). Photo 3 taken on the upper left side face.


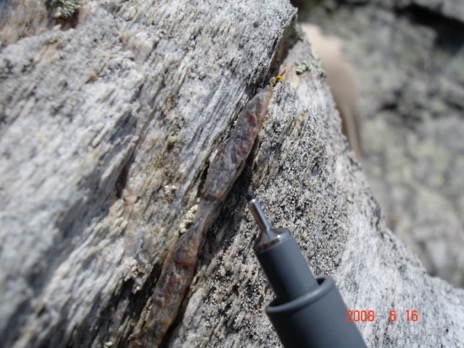


Field sketch of shear band in

Photo 3

**Photo 3.** Close view of asymmetric shear band displacing a small lense of slightly more competent quartzite. The surface of observation is perpendicular to foliation and parallel to lineation. Looking NE. Shear sense is NE-side-up.
