# Supplementary material for: Virtual mapping and analytical data integration: A teaching module using Precambrian crystalline basement in Colorado's Front Range (USA)
Source: Copernicus journal article supplement (doi:10.5194/gc-2021-9), 2021-05-05
Supplement: Supplementary file 24 [file GG20.docx]

**GG20**

**Lithology:** Schist.

**General structure:** This Garnet-andalusite-biotite-muscovite schist has abundant 1-5 cm thick layers of light gray to brown quartzite. The alternating layers of schist and quartzite appear to be relict bedding, but the parallel schistosity in the mica-rich layers is penetrative and so likely a tectonic foliation. A mineral lineation is visible on the foliation surface, defined by muscovite and biotite alignment. Centimeter-scale upright folds of the bedding/schistosity are common.

**Measurements:** The bedding/schistosity strike,dip 254,47. The mineral lineation plunge -> trend is 47 -> 342. The axial surface of one of the folds has a strike,dip of 228,84.
