# Supplementary material for: Virtual mapping and analytical data integration: A teaching module using Precambrian crystalline basement in Colorado's Front Range (USA)
Source: Copernicus journal article supplement (doi:10.5194/gc-2021-9), 2021-05-05
Supplement: Supplementary file 25 [file GG21.docx]

**GG21**

**Lithology:** Bt-granodiorite.

**General structure:** The granodiorite is strongly mylonitic here, with a well-developed stretching lineation defined by smeared quartz and feldspar. On steep faces perpendicular to the foliation and close to parallel to the lineation, a few asymmetric feldspar porphyroclasts indicate SE-side-up motion. This shear sense is clear and so is assigned a relatively high confidence (5 on a scale of 1 to 5).

**Measurements:** Mylonitic foliation strike, dip is 058,78. The stretching lineation plunge -> trend is 54 -> 218.
