# Supplementary material for: Virtual mapping and analytical data integration: A teaching module using Precambrian crystalline basement in Colorado's Front Range (USA)
Source: Copernicus journal article supplement (doi:10.5194/gc-2021-9), 2021-05-05
Supplement: Supplementary file 27 [file GG23.docx]

**GG23**

**Lithology:** Bt-granodiorite.

**General structure:** The granodiorite is strongly mylonitic here, with a steep NE-SW striking foliation.

**Measurements:** The mylonitic foliation has strike,dip of 245,89 and the stretching lineation has plunge -> trend of 70 -> 248.


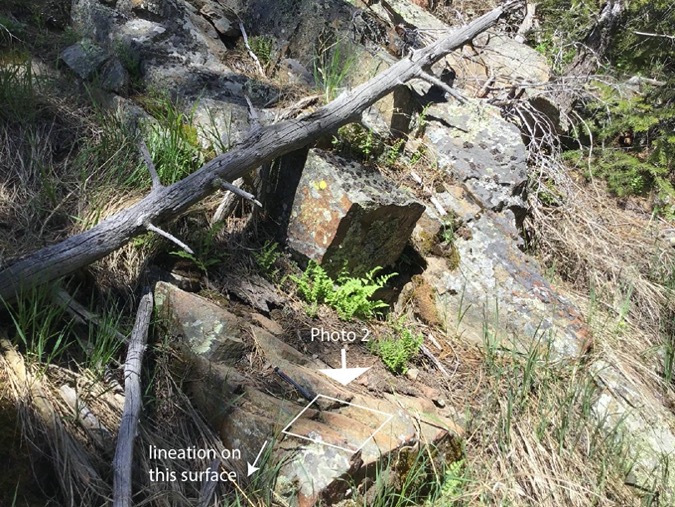


**Photo 1.** Looking North. Note the stretching lineation orientation (pencil) on the side of the outcrop surface (foliation surface). Also, note that Photo 2 was taken looking down onto the shallowly dipping outcrop surface, which is oriented at a high angle to the stretching lineation.


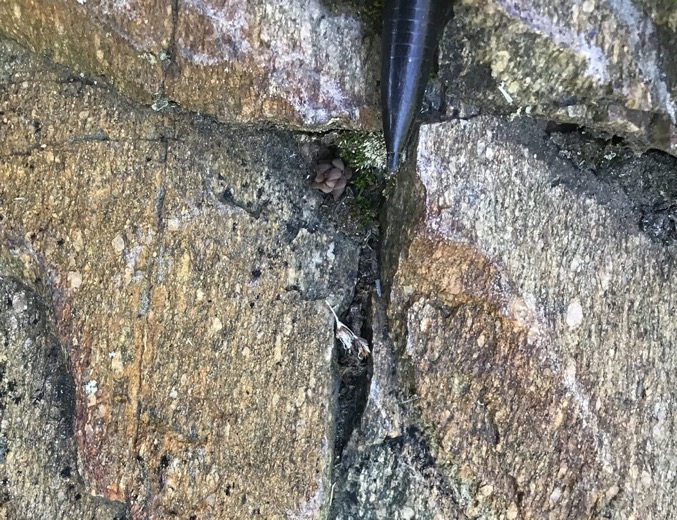


**Photo 2.** Looking down and onto the outcrop surface that is perpendicular to the foliation (traced by orientation of pencil) and nearly perpendicular to the lineation (essentially in and out of the page). So, this is a poor view to see shear sense indicators assuming plane strain simple shear. This is consistent with abundance of nearly symmetric feldspar porphyroclasts and the lack of other observed shear sense indicators.
