# Supplementary material for: Virtual mapping and analytical data integration: A teaching module using Precambrian crystalline basement in Colorado's Front Range (USA)
Source: Copernicus journal article supplement (doi:10.5194/gc-2021-9), 2021-05-05
Supplement: Supplementary file 28 [file GG24.docx]

**GG24**

**Lithology:** Quartzite.

**General structure:** This quartzite has a mylonitic penetrative foliation and stretching lineation defined by alignment of white mica and streaks of variably shaded quartz. Another prominent feature is a m-scale tight Z-fold (viewed down plunge) with a hinge that plunges shallowly northeast. Since the hinge plunges at a high angle to the stretching lineation, the asymmetry of the fold can be a high confidence (CL 5 on scale from 1-5) shear sense indicator, implying **NW-side-up shear**. The outcrop is extensive enough to trace 4-5 meters of mylonitic quartzite across strike to the NW and then at least 10 meters of quartzite with much weaker but still steeply dipping and otherwise concordant (non-mylonitic) foliation.


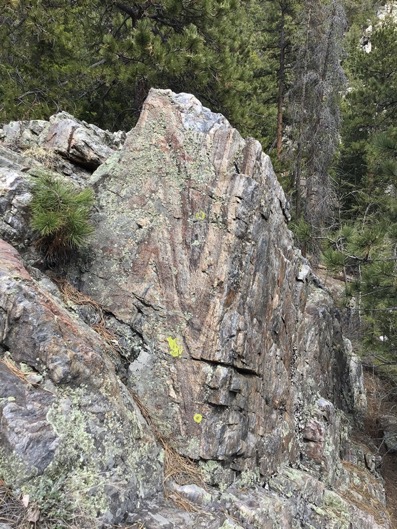


**Measurements:** Mylonitic foliation strike, dip is 065,85. The lineation plunge -> trend is 79 -> 209. An independent measure of the axial surface of the m-scale fold is strike,dip 070,72 with a hinge plunge -> trend 30 -> 055.


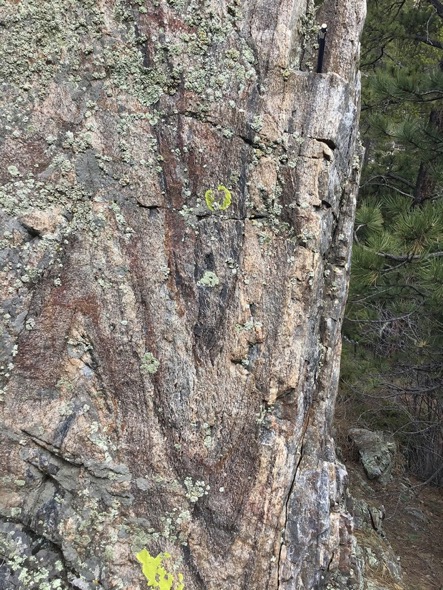


**Photo 1.** Above. Quartzite mylonite outcrop. Looking N. Photos 2 and 3 taken from near


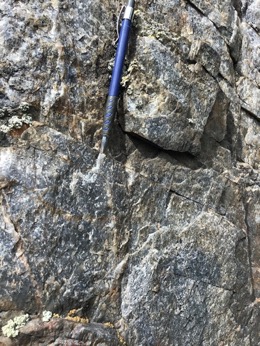

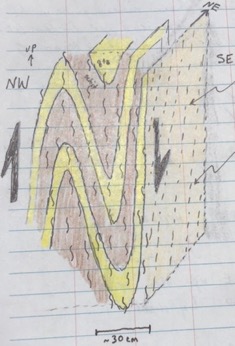
middle of outcrop. Field sketch below.

**Photo 2.** Above. Fold profile view (looking NE) showing fold geometry and trace of axial planar and mylonitic foliation. Note black pencil at upper oriented parallel to fold hinge.

**Photo 3.** Left. Foliation surface showing stretching lineation (parallel to pencil).
