# Supplementary material for: Virtual mapping and analytical data integration: A teaching module using Precambrian crystalline basement in Colorado's Front Range (USA)
Source: Copernicus journal article supplement (doi:10.5194/gc-2021-9), 2021-05-05
Supplement: Supplementary file 29 [file GG25.docx]

**GG25**

**Lithology:** Schist.

**General structure:** The schist, which locally contains garnet, has abundant 1-5 cm thick layers of light gray to brown quartzite that appear to be relict bedding, but the parallel schistosity in the mica-rich layers is penetrative and so likely a tectonic foliation. A visible mineral lineation is defined by needle-like black crystals that may be tourmaline.

**Measurements:** The bedding/schistosity has strike,dip of 250,74. The mineral lineation has a plunge -> trend of 45 -> 035.
