# Supplementary material for: Virtual mapping and analytical data integration: A teaching module using Precambrian crystalline basement in Colorado's Front Range (USA)
Source: Copernicus journal article supplement (doi:10.5194/gc-2021-9), 2021-05-05
Supplement: Supplementary file 31 [file GG27.docx]

**GG27**

**Lithology:** Quartzite.

**General structure:** Cm- to dm-scale layers of grayish white massive quartzite are separated by small 1-2 cm thick layers of a slightly more micaceous quartzite. The layers appear to be relict bedding but the micaceous layers appear to have a penetrative foliation that is in most places nearly parallel to the layering and that could be tectonic.

**Measurements:** The bedding/folation has strike,dip of 071,66.
