# Supplementary material for: Virtual mapping and analytical data integration: A teaching module using Precambrian crystalline basement in Colorado's Front Range (USA)
Source: Copernicus journal article supplement (doi:10.5194/gc-2021-9), 2021-05-05
Supplement: Supplementary file 32 [file GG28.docx]

**GG28**

**Lithology:** Bt-granodiorite float, adjacent to quartzite float

**General structure:** There is no convincing outcrop here, but abundant float of granodiorite only in an area to the NW and of quartzite only just a few meters to the SE suggests there may be an **approximately mappable contact** here.

**Measurements:** No measurements here.

**
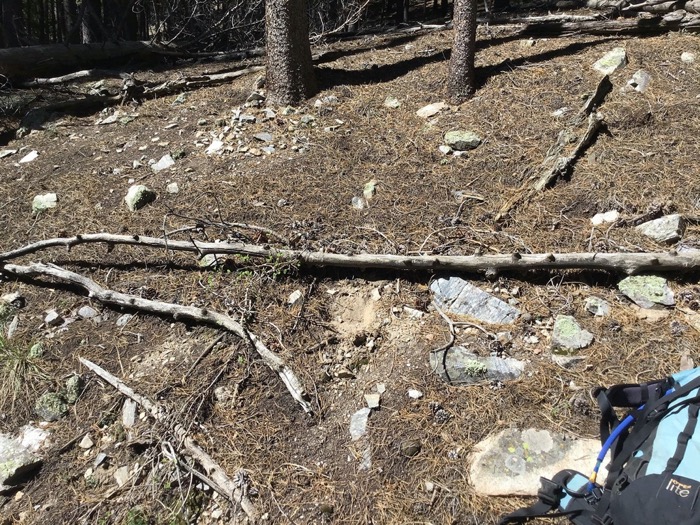

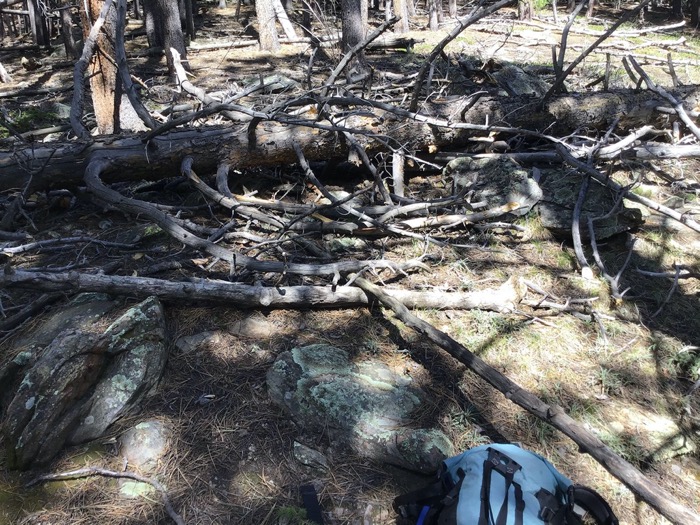
Photo 1.** All granodiorite float. Looking North.

**Photo 2.** Right. All quartzite float. Looking Southwest.
