# Supplementary material for: Virtual mapping and analytical data integration: A teaching module using Precambrian crystalline basement in Colorado's Front Range (USA)
Source: Copernicus journal article supplement (doi:10.5194/gc-2021-9), 2021-05-05
Supplement: Supplementary file 33 [file GG29.docx]

**GG29**

**Lithology:** Bt-granodiorite

**General structure:** This outcrop of granodiorite a moderately developed foliation defined by biotite alignment. The foliation is not mylonitic in that there are not abundant tails of recrystallized material around phenocrysts.

**Measurements:** The foliation strike, dip is 030,75.


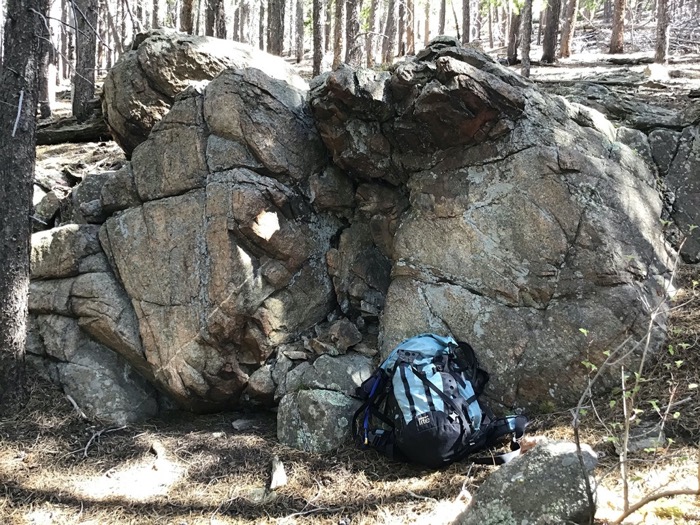


**Photo 1.** Looking NE. Outcrop of Bt-granodiorite. Photo 2 was taken on the surface above the pack.


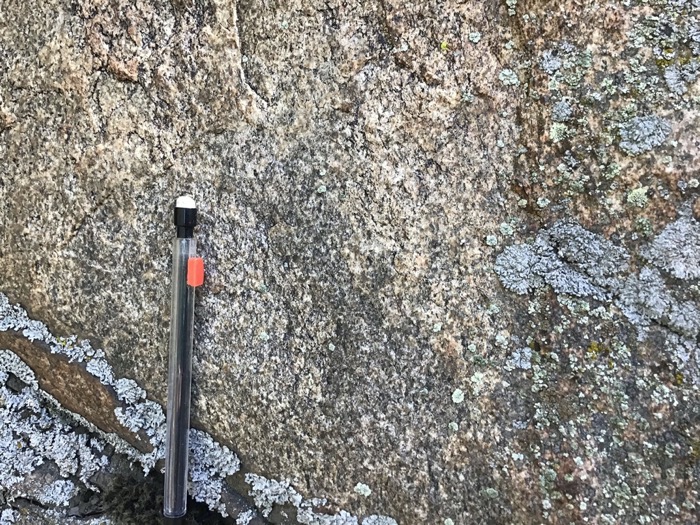


**Photo 2.** A close view showing the trace of the weak foliation. Looking NE.
