# Supplementary material for: Virtual mapping and analytical data integration: A teaching module using Precambrian crystalline basement in Colorado's Front Range (USA)
Source: Copernicus journal article supplement (doi:10.5194/gc-2021-9), 2021-05-05
Supplement: Supplementary file 34 [file GG3.docx]

**GG3**

**Lithology:** Schist, adjacent to quartzite.

**General structure:** Garnet-andalusite-biotite-muscovite schist with interlayered quartzite. This outcrop is schist with small (up to 0.5 mm) garnet porphyroblasts and up to 1 cm sized gray porphyro­blasts that are suspected andalusite. 1-5 cm thick layers of dark gray quartzite are abundant. The alternating layers of schist and quartzite can be interpreted as relict bedding but the parallel schistosity is likely a tectonic foliation. This outcrop is also notable because the dip of the layering + schistosity systematically changes across about a 3 meter “across-strike” distance from relatively shallow on the NW side to much steeper to the SE. There are also smaller cm-scale folds developed in the schist. At the far NE end of the outcrop (in background of Photo1) there is an across strike lithologic transition from schist on the NW to more pure quartzite (see later photo), which is a **potentially mappable contact**.


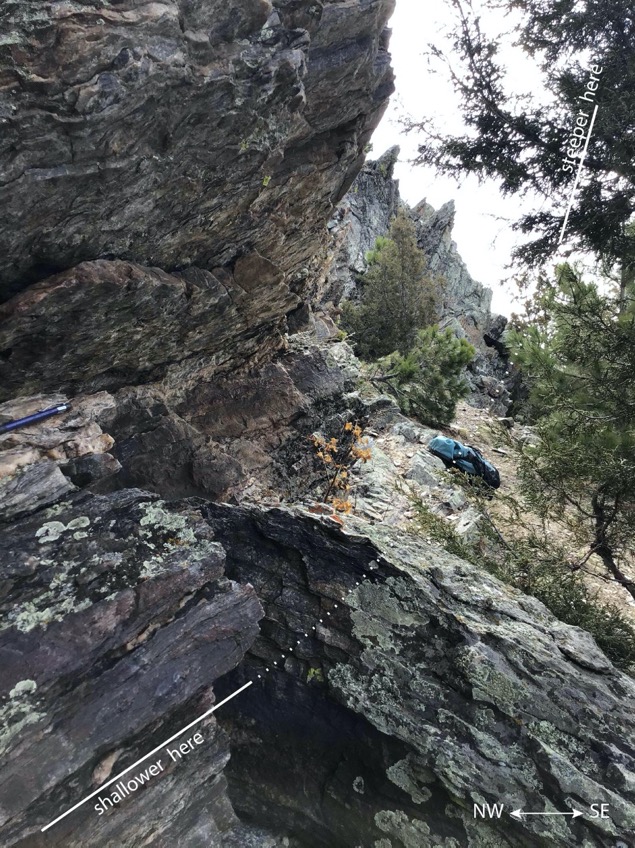


**Measurements:** Shallower dipping layers strike,dip 273,29. On this same surface, a min­eral lineation defined by white mica flakes is also visible on the surfaces of thin quartzite layers and has a plunge -> trend of 29->355. Steeper dipping beds strike,dip 249,52. In the portion of the outcrop where bedding/schistosity dip shallowly, an open fold axial surface has strike,dip 61,72 and a hinge plunge->trend of 10->066. Another one has strike,dip of 246,63 and hinge plunge->trend of 17->065.

***Photo 1.*** Looking NE along the trend of the outcrop-scale upwarping layers. Note the pencil in the foreground for scale, which is in the same position for Photos 2 and 3. Also note the cm-scale open folds of the layering in the upper left, overhanging part of the outcrop. Several of the these fold mea­surements are noted.


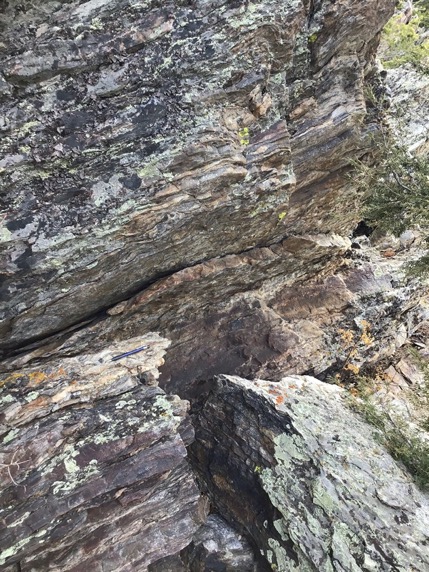


***Photo 2.*** *Left.* Close-up of the more shallowly dipping schist in the foreground of Photo 1. Note pencil for scale.


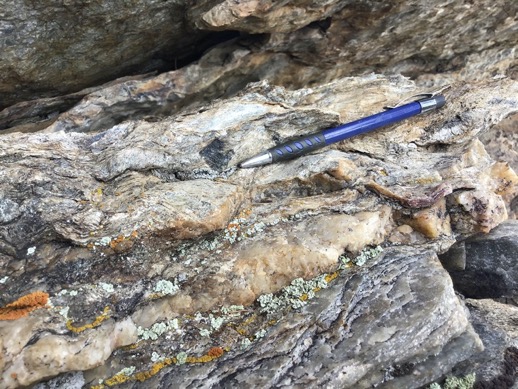


***
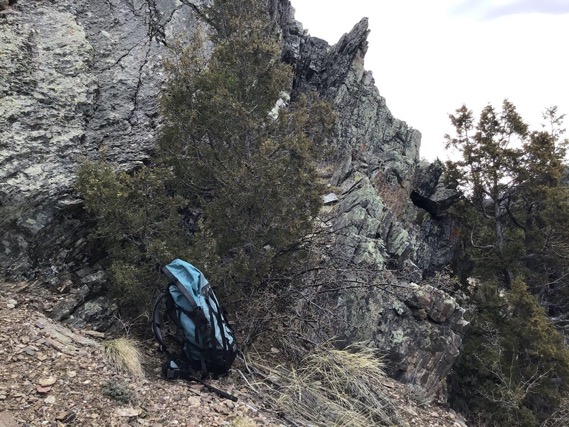
Photo 3.*** Above.Close-up of the schist with pencil for scale in Photo 2. The blocky gray porphyroblast is probably andalusite.

***Photo 4.*** Left.The far end of the outcrop (in distance in Photo 1). The left side of this outcrop is schist, but the lower right 2 meters is pure quartzite.


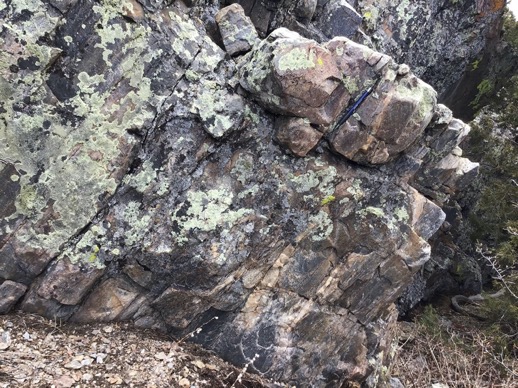


***Photo 5.*** Right.A closer view of the quartzite in the lower right of Photo 4.
