# Supplementary material for: Virtual mapping and analytical data integration: A teaching module using Precambrian crystalline basement in Colorado's Front Range (USA)
Source: Copernicus journal article supplement (doi:10.5194/gc-2021-9), 2021-05-05
Supplement: Supplementary file 35 [file GG30.docx]

**GG30**

**Lithology:** Quartzite.

**General structure:** This quartzite has a prominant layering defined by cm-scale bands of slightly lighter and darker shades of white and gray, and by 1-2 cm thick layers with slightly more mica. The layering could be interpreted to represent bedding, but a mineral lineation on the surface of the more micaceous layers defined by a white mica suggests that the layering is probably also a tectonic fabric. Some layers show the trace of a more steeply dipping penetrative 2nd foliation that is oblique to the layering, defined by wispy alternating layers of slightly differently colored quartz. Local quartz-pebble conglomeratic horizons are locally present in outcrop and abundant in float here.

**Measurements:** The bedding/layering strike, dip is 055,53. The mineral lineation on the bedding/layering surface has a plunge -> trend of 40 -> 198. The steeper 2nd foliation strike, dip is 48,63.
