# Supplementary material for: Virtual mapping and analytical data integration: A teaching module using Precambrian crystalline basement in Colorado's Front Range (USA)
Source: Copernicus journal article supplement (doi:10.5194/gc-2021-9), 2021-05-05
Supplement: Supplementary file 36 [file GG31.docx]

**GG31**

**Lithology:** Schist

**General structure:** This outcrop is Grt-Ms-Bt schist with abundant 1-5 cm thick layers of light gray to brown quartzite. The alternating layers of schist and quartzite appear to be relict bedding, but the parallel schistosity in the mica-rich layers is penetrative and so likely a tectonic foliation. A mineral lineation is visible on the foliation surface, defined by muscovite and biotite alignment. Centimeter-scale upright folds of the bedding/schistosity are common.

**Measurements:** The bedding/schistosity has strike, dip is 049,27. The plunge -> trend of a hinge of a cm-scale fold of the schistosity is 42 -> 092.


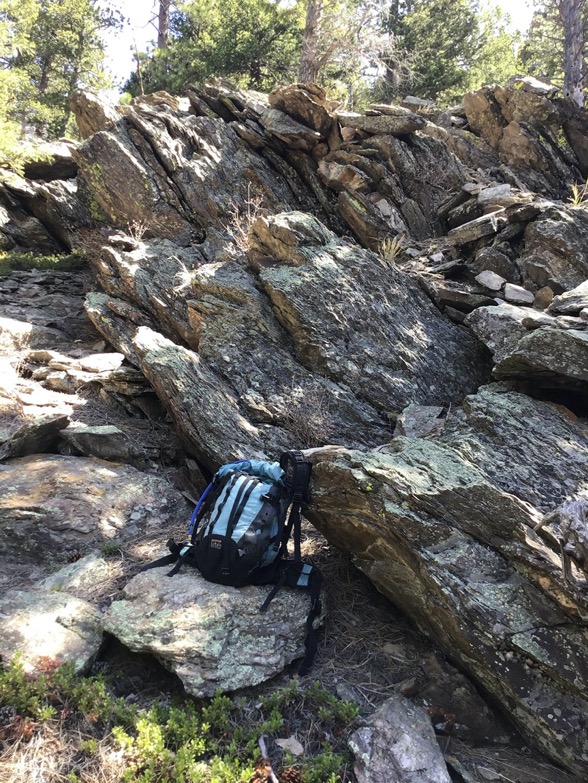


**Photo 1.** Outcrop view looking NE.
