# Supplementary material for: Virtual mapping and analytical data integration: A teaching module using Precambrian crystalline basement in Colorado's Front Range (USA)
Source: Copernicus journal article supplement (doi:10.5194/gc-2021-9), 2021-05-05
Supplement: Supplementary file 37 [file GG32.docx]

**GG32**

**Lithology:** Schist.

**General structure:** This outcrop is Ms-Bt schist with abundant 1-5 cm thick layers of light gray to brown quartzite. The alternating layers of schist and quartzite appear to be relict bedding, but the parallel schistosity in the mica-rich layers is penetrative and so likely a tectonic foliation. Centimeter-scale upright and shallowly plunging folds of the bedding/schistosity are common.

**Measurements:** The bedding/foliation strike, dip is 012,31. A measurement of an upright fold hinge has plunge -> trend of 30 -> 073.
