# Supplementary material for: Virtual mapping and analytical data integration: A teaching module using Precambrian crystalline basement in Colorado's Front Range (USA)
Source: Copernicus journal article supplement (doi:10.5194/gc-2021-9), 2021-05-05
Supplement: Supplementary file 38 [file GG33.docx]

**GG33**

**Lithology:**

**General structure:** This outcrop, just off of the Burro Trail near a saddle on a ridge, displays a contact between strongly foliated (mylonitic) granodiorite on the SE and strongly foliated (mylonitic) quartzite on the NW. The mylonitic foliation in the granodiorite has a well-developed stretching lineation defined by smeared quartz and feldspar. Local cm-scale veins of coarse-grained pink granite pegmatite are also mylonitized and display asymmetric porphyroclasts and S-C fabrics indicating **SE-side-up sense of shear** with generally high confidence (confidence 5 on a scale of 1 to 5). The quartzite is also strongly mylonitic and preserves a well-developed stretching lineation defined by white mica flakes and streaks of variably colored quartz.

**Measurements:** Mylonitic foliation in the granodiorite has strike, dip is 061,89. The stretching lineation plunge -> trend is 61 -> 241. Mylonitic foliation in the quartzite has strike, dip of 245,89. The stretching lineation plunge -> trend is 75 -> 266.


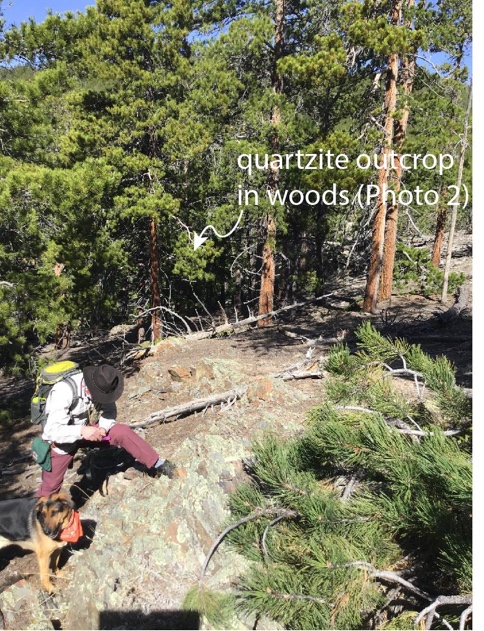


**Photo 1.** Left. Outcrop view looking North. Granodiorite mylonite in foreground, and quartzite mylonite outcrop location indicated in the shadowed woods (see Photo 2).

**
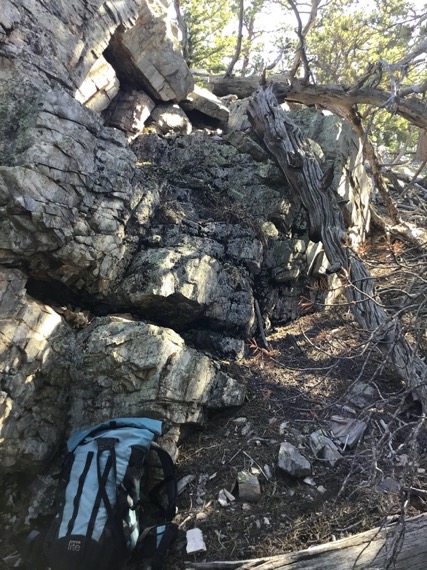
**

**Photo 2.** Right. Close view of quartzite mylonite outcrop with steeply dipping foliation. Looking NE.


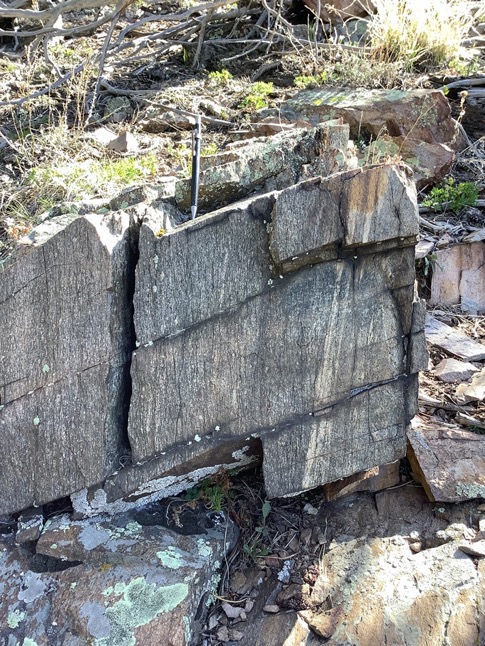
**Photo 3.** Left. View looking NE on a surface close to the “kinematic plane”; perpendicular to the steeply dipping foliation and parallel to the stretching lineation (parallel to the pen). Photo 4 is zoomed in on the center of this face.


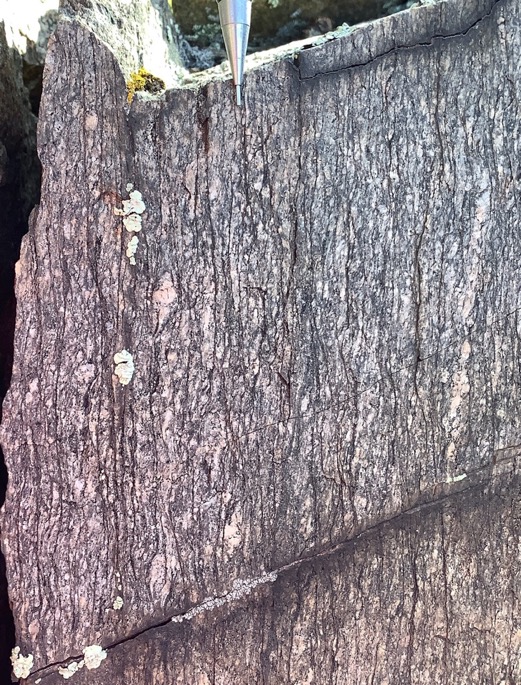


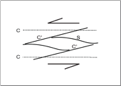
**Photo 4.** Right. View looking NE on a surface close to the “kinematic plane”; perpendicular to the steeply dipping foliation and parallel to the stretching lineation (parallel to the pen). Note the asymmetric S-C-C’ fabric geometry on several parts of the outcrop face, indicating Southeast-side-up sense of shear. See inset schematic for S-C-C’ reference.
