# Supplementary material for: Virtual mapping and analytical data integration: A teaching module using Precambrian crystalline basement in Colorado's Front Range (USA)
Source: Copernicus journal article supplement (doi:10.5194/gc-2021-9), 2021-05-05
Supplement: Supplementary file 39 [file GG34.docx]

**GG34**

**Lithology:** Quartzite.

**General structure:** A prominent penetrative mylonitic foliation is the most obvious structure in this light gray quartzite, and a strong lineation is defined by align­ment of white mica flakes and streaks of slightly variably shaded quartz.

**Measurements:** The mylonitic foliation strike, dip is 239,89. The lineation plunge -> trend is 67 -> 230.
