# Supplementary material for: Virtual mapping and analytical data integration: A teaching module using Precambrian crystalline basement in Colorado's Front Range (USA)
Source: Copernicus journal article supplement (doi:10.5194/gc-2021-9), 2021-05-05
Supplement: Supplementary file 40 [file GG35.docx]

**GG35**

**Lithology:** Bt-granodiorite.

**General structure:** The granodiorite is strongly foliated and mylonitic here. It has a well-developed stretching lineation defined by smeared feldspar and biotite alignment.

**Measurements:** The mylonitic foliation strike,dip is 064,84.
