# Supplementary material for: Virtual mapping and analytical data integration: A teaching module using Precambrian crystalline basement in Colorado's Front Range (USA)
Source: Copernicus journal article supplement (doi:10.5194/gc-2021-9), 2021-05-05
Supplement: Supplementary file 41 [file GG36.docx]

**GG36**

**Lithology:** Quartzite.

**General structure:** A northwest-southeast trending band of low quartzite cliffs occurs here, and it displays a transition over about a 10 meter distance from strongly foliated quartzite on the southeast end of the band to very weakly foliated quartzite on the northwest end. At the southeast end, a prominent steeply dipping penetrative mylonitic foliation is the most obvious structure, and a strong lineation is defined by alignment of white mica flakes and streaks of slightly different shaded quartz. In the middle of the band and at the northwestern end, shallowly dipping layers of massive quartzite and local quartz-pebble conglomeratic horizons (especially at the base of the cliff) are common and the conglomeratic quartzite is also abundant in float (photo).

**Measurements:** Mylonitic foliation in the quartzite at the southeast end of the low cliff band has strike, dip 237,77. The stretching lineation plunge -> trend is 70 -> 323.

**
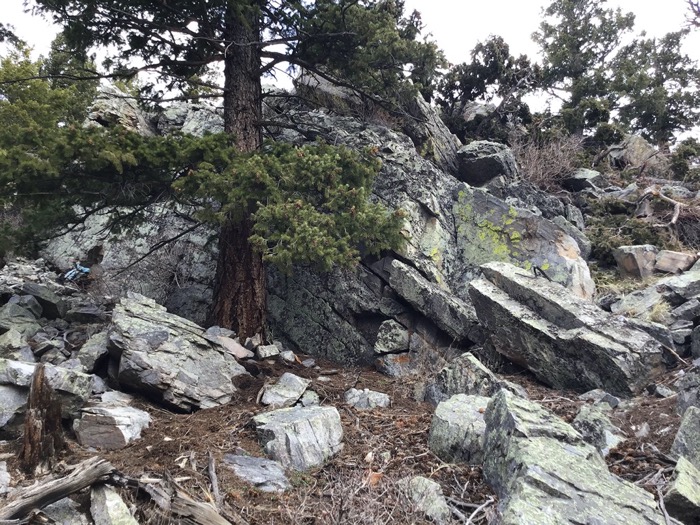
**

**Photo 1.** View looking NE at low band of cliffs. This is the middle and northwest end where quartzite layers (bedding) are shallowly dipping into the slope. The mylonitic quartzite is just off the photo to the right.


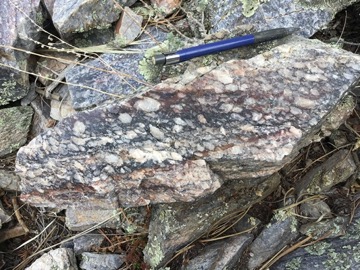


**Photo2.** Conglomeratic quartzite float.
