# Supplementary material for: Virtual mapping and analytical data integration: A teaching module using Precambrian crystalline basement in Colorado's Front Range (USA)
Source: Copernicus journal article supplement (doi:10.5194/gc-2021-9), 2021-05-05
Supplement: Supplementary file 43 [file GG38.docx]

**GG38**

**Lithology:** Bt-granodiorite

**General structure:** This outcrop of granodiorite has a magmatic foliation most prominently defined by

aligned blocky feldspar crystals that appears to dipping shallowly. Locally superimposed on that magmatic foliation are 10’s of cm scale domains of steeply dipping foliation defined by biotite alignment. The foliation is weakly to moderately developed, but not mylonitic in that there are not abundant tails of

recrystallized material around phenocrysts.

**Measurements:** The foliation strike, dip is 060,75.


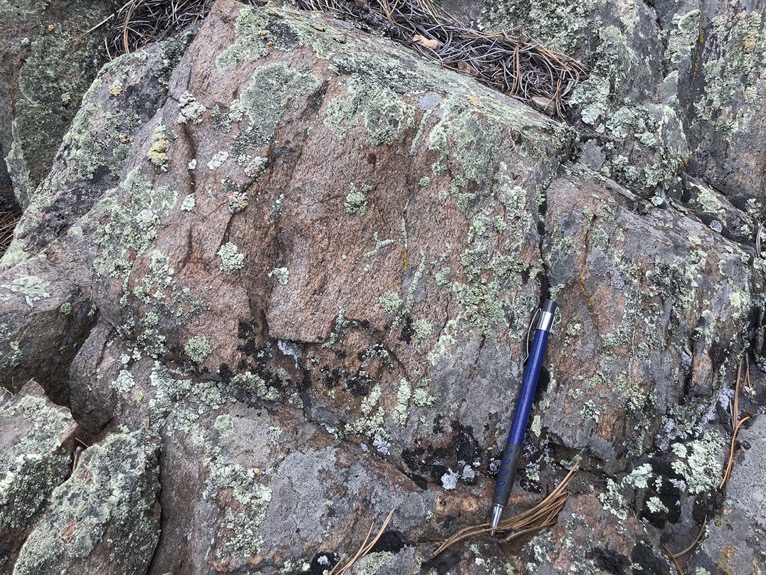


**Photo 1.** Typical outcrop of weak to moderately foliated granodiorite. Pencil

is aligned parallel to the trace of the foliation.
