# Supplementary material for: Virtual mapping and analytical data integration: A teaching module using Precambrian crystalline basement in Colorado's Front Range (USA)
Source: Copernicus journal article supplement (doi:10.5194/gc-2021-9), 2021-05-05
Supplement: Supplementary file 44 [file GG39.docx]

**GG39**

**Lithology:** Quartzite.

**General structure:** This quartzite has a prominent layering defined by cm-scale bands of slightly lighter

and darker shades of white, gray, and bluish gray that could be interpreted to represent bedding. Some

layers show the trace of a steeply dipping penetrative foliation defined by white mica flakes and wispy

alternating layers of slightly different colored quartz.

**Measurements:** The bedding strike, dip is 017,46. The steeper foliation strike, dip is 059,60.

**
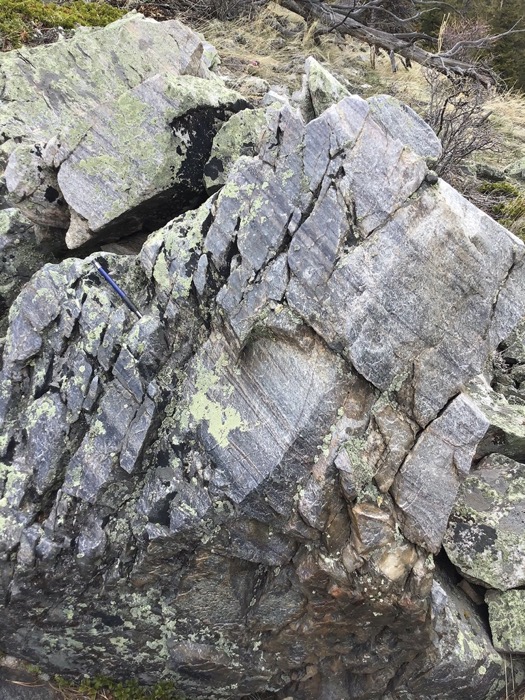
Photo 1.** View looking east at quartzite outcrop. Note prominent layering interpreted as bedding.
