# Supplementary material for: Virtual mapping and analytical data integration: A teaching module using Precambrian crystalline basement in Colorado's Front Range (USA)
Source: Copernicus journal article supplement (doi:10.5194/gc-2021-9), 2021-05-05
Supplement: Supplementary file 45 [file GG4.docx]

**GG4**

**Lithology:** Bt-granodiorite.

**General structure:** The granodiorite is strongly mylonitic here, with cm-scale zones of ultramylonite, with a well-developed stretching lineation defined by smeared quartz and feldspar. On steep faces perpendicular to the foliation and close to parallel to the lineation, a few asymmetric feldspar porphyroclasts suggest NW-side-up (normal sense) motion. This shear sense is not very clear and so is assigned a relatively low confidence (2 on a scale of 1 to 5).

**Measurements:** Mylonitic foliation strike, dip is 063,84. The stretching lineation plunge -> trend is 63 -> 231.


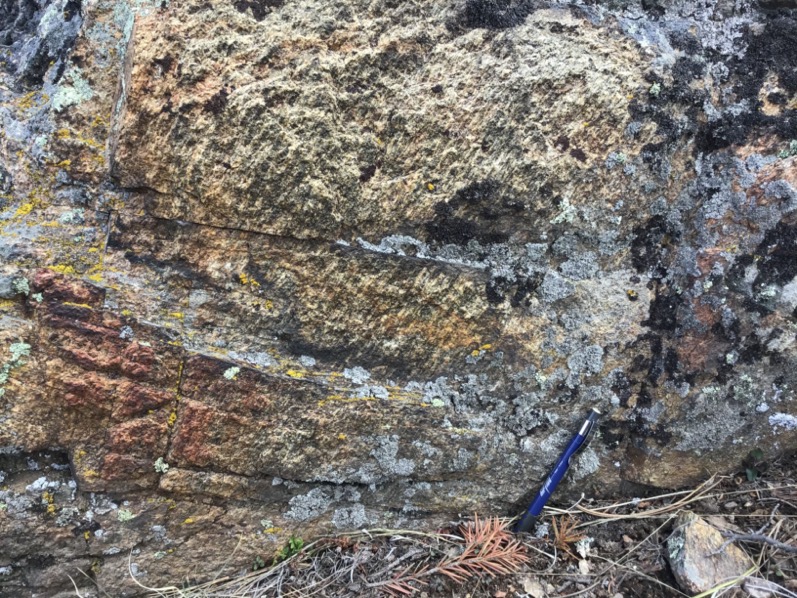
***Photo 1.*** Subvertical outcrop surface parallel to mylonitic foliation. Looking NW. A

well-developed lineation is defined by stretched feldspar (white streaks) and biotite

(dark).
