# Supplementary material for: Virtual mapping and analytical data integration: A teaching module using Precambrian crystalline basement in Colorado's Front Range (USA)
Source: Copernicus journal article supplement (doi:10.5194/gc-2021-9), 2021-05-05
Supplement: Supplementary file 47 [file GG41.docx]

**GG41**

**Lithology:** Quartzite.

**General structure:** This quartzite has a prominant layering defined by cm-scale bands of slightly lighter and darker shades of white, gray, and bluish gray that could be interpreted to represent bedding. Some layers show the trace of a steeply dipping penetrative foliation defined by white mica flakes and wispy alternating layers of slightly differently colored quartz.

**Measurements:** The bedding strike, dip is 009,18. The steeper foliation strike,dip is 040,81.
