# Supplementary material for: Virtual mapping and analytical data integration: A teaching module using Precambrian crystalline basement in Colorado's Front Range (USA)
Source: Copernicus journal article supplement (doi:10.5194/gc-2021-9), 2021-05-05
Supplement: Supplementary file 48 [file GG42.docx]

**GG42**

**Lithology:** Schist.

**General structure:** This outcrop is garnet-biotite-muscovite schist has abundant 1-5 cm thick layers of light gray to brown quartzite. The alternating layers of schist and quartzite appear to be relict bedding, but the parallel schistosity in the mica-rich layers is penetrative and so likely a tectonic foliation. A mineral lineation is visible on the foliation surface, defined by muscovite alignment and Fe-stained streaks of what may be feldspar.

**Measurements:** The bedding/schistosity strike,dip 044,68. The mineral lineation plunge -> trend is 44 -> 220.

**
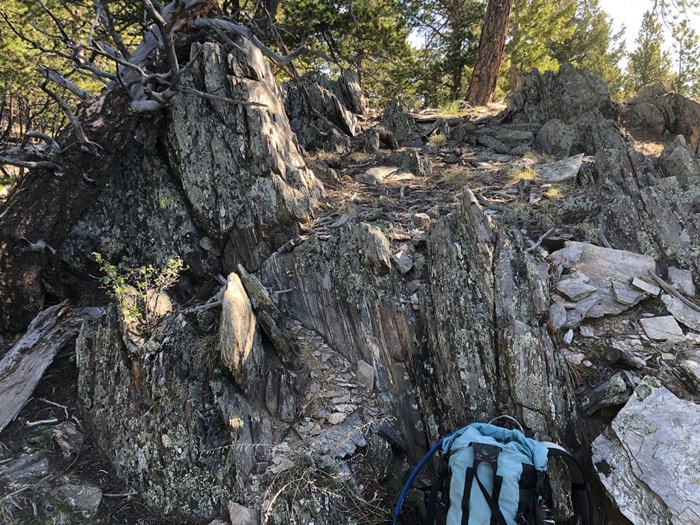
**

**Photo 1.** Looking NE at the steep schistosity at GG42.


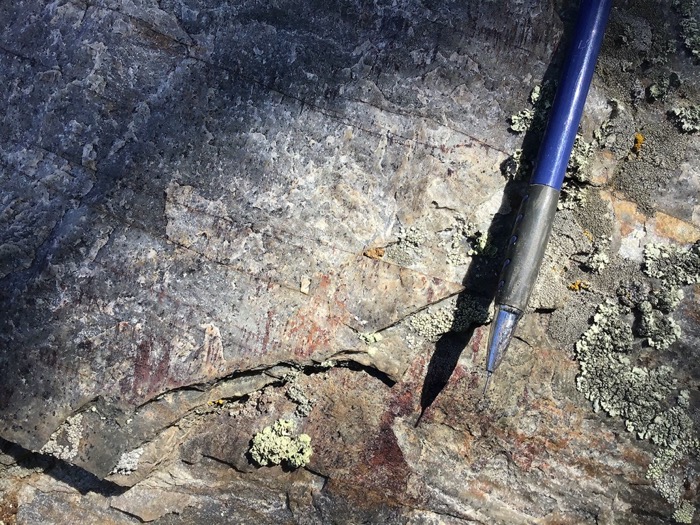


**Photo 2.** Right.Looking West at foliation surface of a thin quartzite layer in the schist. A mineral lineation is visible (parallel to the pencil) and defined by white mica flakes and dark red (rusty) streaks of an unidentified mineral (Fe-stained feldspar?).
