# Supplementary material for: Virtual mapping and analytical data integration: A teaching module using Precambrian crystalline basement in Colorado's Front Range (USA)
Source: Copernicus journal article supplement (doi:10.5194/gc-2021-9), 2021-05-05
Supplement: Supplementary file 49 [file GG43.docx]

**GG43**

**Lithology:** Schist.

**General structure:** This outcrop is schist with abundant 1-5 cm thick layers of light gray to brown quartzite. The alternating layers of schist and quartzite appear to be relict bedding, but the parallel schistosity in the mica-rich layers is penetrative and so likely a tectonic foliation. Cm-scale inclined and shallowly plunging folds of the schistosity are also common, and there is a locally developed 2nd penetrative foliation that appears to be axial planar to these folds.

**Measurements:** The bedding/schistosity strike, dip is 039,82. The oblique 2nd foliation strike,dip is 256,69. The axial surface of one of the cm-scale folds has a strike, dip of 246,69 and a hinge with a plunge -> trend of 28 -> 067.
