# Supplementary material for: Virtual mapping and analytical data integration: A teaching module using Precambrian crystalline basement in Colorado's Front Range (USA)
Source: Copernicus journal article supplement (doi:10.5194/gc-2021-9), 2021-05-05
Supplement: Supplementary file 50 [file GG44.docx]

**GG44**

**Lithology:** Schist, adjacent to quartzite

**General structure:** There is no in place outcrop (so no measurements) at this locality, but the dominance of float lithology changes abruptly over a several meter distance, suggesting a **potentially mappable contact** between schist to the SE and quartzite to the NW to within about 10 meters.

**Measurements:** No measurement made here.
