# Supplementary material for: Virtual mapping and analytical data integration: A teaching module using Precambrian crystalline basement in Colorado's Front Range (USA)
Source: Copernicus journal article supplement (doi:10.5194/gc-2021-9), 2021-05-05
Supplement: Supplementary file 51 [file GG45.docx]

**GG45**

**Lithology:** Quartzite.

**General structure:** Cm- to dm-scale layers of grayish white massive quartzite are separated by small 1-2 cm thick layers of a more micaceous quartzite. These thin layers have a penetrative cleavage that appears mostly parallel to the larger scale alternating lay­ers. The layers are interpreted as relict bedding but the penetrative cleavage suggests there may be a tectonic foliation that is here parallel to the bedding.

**Measurements:** Bedding (and penetrative cleavage) strike, dip is 251,33.


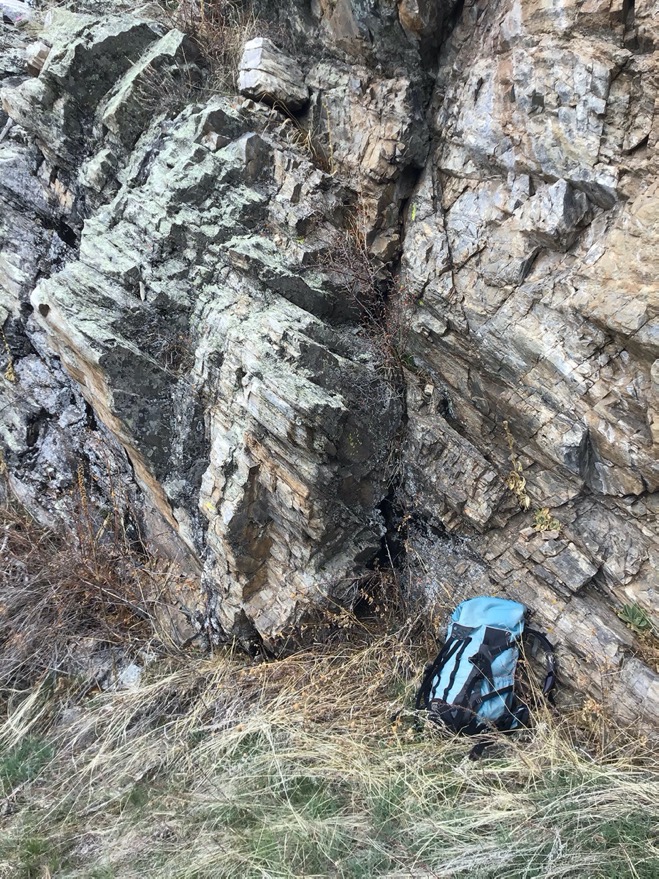


**Photo 1.**Outcrop view is looking W, with bedding layers dipping into the cliff face (NW).
