# Supplementary material for: Virtual mapping and analytical data integration: A teaching module using Precambrian crystalline basement in Colorado's Front Range (USA)
Source: Copernicus journal article supplement (doi:10.5194/gc-2021-9), 2021-05-05
Supplement: Supplementary file 52 [file GG46.docx]

**GG46**

**Lithology:** Schist.

**General structure:** This outcrop is Garnet-andalusite-biotite-muscovite schist with abundant 1-5 cm thick layers of light gray to brown quartzite. The alternating layers of schist and quartzite appear to be relict bedding, but the parallel schistosity in the mica-rich layers is penetrative and so likely a tectonic foliation. Centimeter-scale moderately inclined folds of the bedding/schistosity are common and a second foliation is locally developed that appears to coincide with the axial surface of these folds.

**Measurements:** The bedding/schistosity strike,dip 264,51. The axial surface foliation strike,dip is 064,62.
