# Supplementary material for: Virtual mapping and analytical data integration: A teaching module using Precambrian crystalline basement in Colorado's Front Range (USA)
Source: Copernicus journal article supplement (doi:10.5194/gc-2021-9), 2021-05-05
Supplement: Supplementary file 53 [file GG47.docx]

**GG47**

**Lithology:** Quartzite.

**General structure:** Cm- to dm-scale layers of grayish white massive quartzite are separated by small 1-2 cm thick layers of a more micaceous quartzite. The layers are interpreted as relict bedding. The layering has a wavy appearance that looks like open folding.

**Measurements:** The layering has an approximate strike, dip of 332,31.


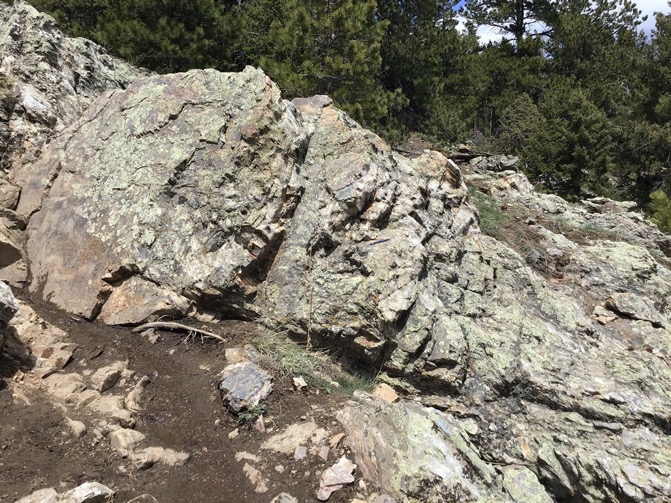


Photo 2

**Photo 1.** Outcrop view is looking N, with bedding layers dipping away and to the right from the viewer.


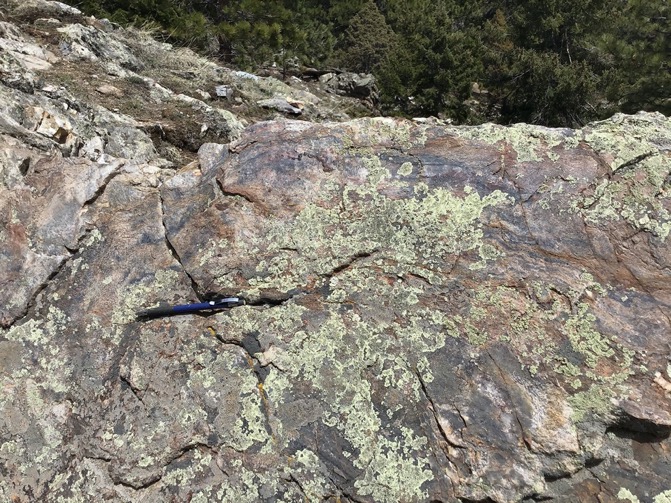
**Photo 2.**Closer view is looking NE, with layers dipping away from the viewer. Note pencil for scale aligned close to the trace of the layering. Also note the wavy antiformal appearance of the layering.
