# Supplementary material for: Virtual mapping and analytical data integration: A teaching module using Precambrian crystalline basement in Colorado's Front Range (USA)
Source: Copernicus journal article supplement (doi:10.5194/gc-2021-9), 2021-05-05
Supplement: Supplementary file 54 [file GG48.docx]

**GG48**

**Lithology:** Quartzite.

**General structure:** Cm- to dm-scale layers of grayish white massive quartzite separated by small 1-2 cm thick layers of a more micaceous quartzite. The layers could represent relict bedding, but the thin layers also have a penetrative cleavage that appears mostly parallel to the larger scale alternating layers. This suggests there may be a tectonic foliation that is here parallel to the bedding.

**Measurements:** The bedding/schistosity strike,dip 063,53.
