# Supplementary material for: Virtual mapping and analytical data integration: A teaching module using Precambrian crystalline basement in Colorado's Front Range (USA)
Source: Copernicus journal article supplement (doi:10.5194/gc-2021-9), 2021-05-05
Supplement: Supplementary file 55 [file GG49.docx]

**GG49**

**Lithology:** Schist, in contact with quartzite.

**General structure:** This Garnet-biotite-muscovite schist outcrop contains a **likely mappable contact** between schist to the SE and quartzite to the NW. The compositional layers in the schist appear to be relict bedding, but the parallel schistosity in the mica-rich layers is penetrative and so likely a tectonic foliation. Centimeter-scale upright folds of the bedding/schistosity are common.

**Measurements:** The bedding/schistosity in the schist has strike,dip 056,76. The bedding/layering in the quartzite has strike,dip of 066,74. The axial surface of one of the upright folds has strike,dip is 070,85.
