# Supplementary material for: Virtual mapping and analytical data integration: A teaching module using Precambrian crystalline basement in Colorado's Front Range (USA)
Source: Copernicus journal article supplement (doi:10.5194/gc-2021-9), 2021-05-05
Supplement: Supplementary file 56 [file GG5.docx]

**GG5**

**Lithology:** Quartzite.

**General structure:** This outcrop, just above the trail, is a light gray quartzite with cm-scale layers of slightly lighter and darker shades interpreted to represent bedding. A faint planar structure that is oblique to the bedding is a penetrative foliation. A mineral lineation on this surface is defined by white mica and a rare biotite flakes.


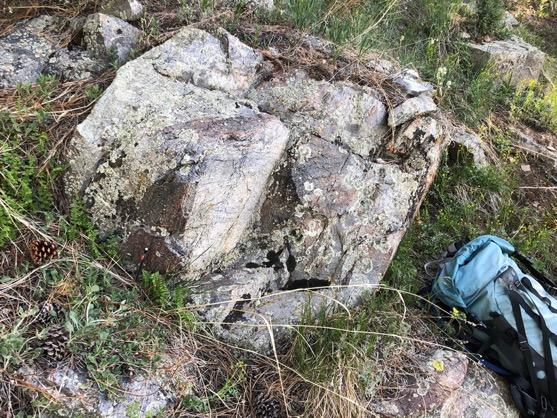
**Measurements:** The bedding strike, dip is 266,34. The cleavage strike, dip is 235,80. The mineral lineation has plunge -> trend of 39->243.

**
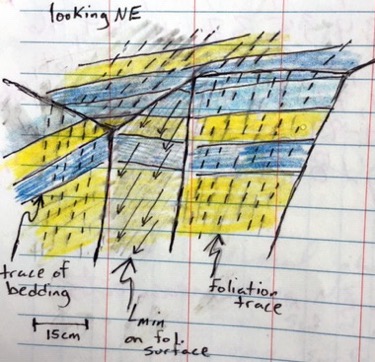
**Field sketch with intersections between bedding and foliation on surfaces.

**Photo 1.** Outcrop looking NE.

**
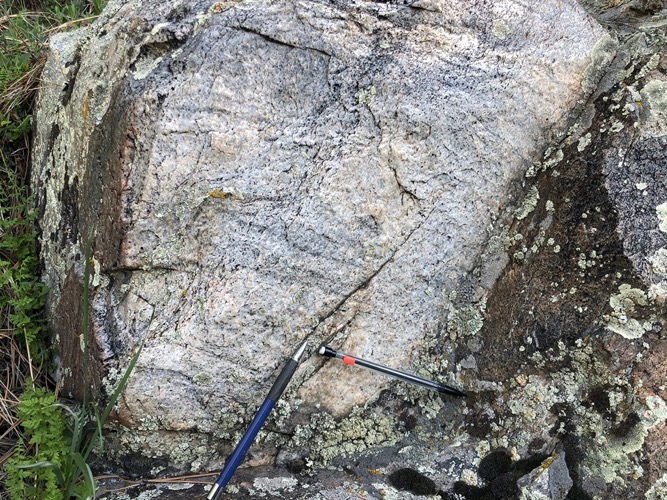
**

**Photo 2.** Outcrop looking N, at the foliation surface where a mineral lineation plunges SW (left, blue pencil) and the trace of bedding plunges NE (right, clear/black pencil).
