# Supplementary material for: Virtual mapping and analytical data integration: A teaching module using Precambrian crystalline basement in Colorado's Front Range (USA)
Source: Copernicus journal article supplement (doi:10.5194/gc-2021-9), 2021-05-05
Supplement: Supplementary file 59 [file GG52.docx]

**GG52**

**Lithology:** Bt-granodiorite.

**General structure:** This outcrop of granodiorite, in a narrow ravine, is strongly foliated and has a moderately well-developed stretching lineation defined by streaks of feldspar, quartz, and biotite. The exposure is about 8 m-wide across the strike of the foliation.

**Measurements:** The foliation strike, dip is 263,70. The lineation has plunge -> trend of 43 -> 071.


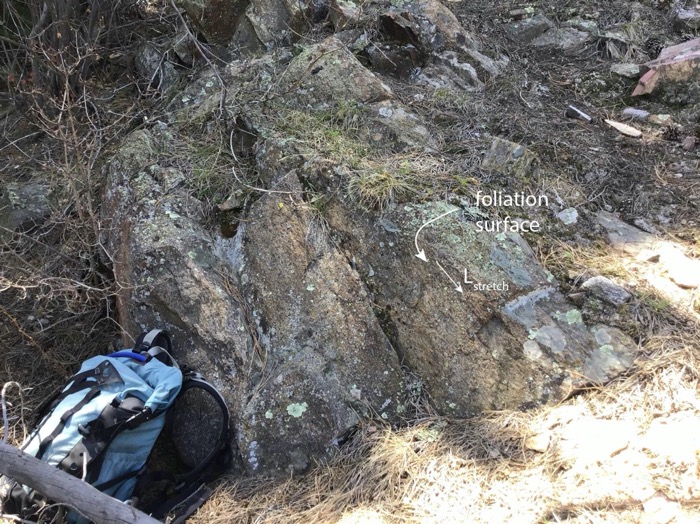


Photo 1. Outcrop of foliated granodiorite, looking west. One part of the outcrop exposes a foliation surface on which a stretching lineation is visible.
