# Supplementary material for: Virtual mapping and analytical data integration: A teaching module using Precambrian crystalline basement in Colorado's Front Range (USA)
Source: Copernicus journal article supplement (doi:10.5194/gc-2021-9), 2021-05-05
Supplement: Supplementary file 60 [file GG53.docx]

**GG53**

**Lithology:** Schist, in contact with quartzite.

**General structure:** This outcrop displays an abrupt transition from Garnet-andalusite-biotite-muscovite schist (with abundant 1-5 cm thick layers of light gray to brown quartzite) on the NW to quartzite on the SE, which is a **possibly mappable contact**. The compositional layers in the schist appear to be relict bedding, but the parallel schistosity in the mica-rich layers is penetrative and so likely a tectonic foliation. Centimeter- to 10’s of centimeter-scale inclined folds of the bedding/schistosity are common (photo). The quartzite has a prominent steeply dipping foliation (photo) but does not display folds like those developed in the schist.

**Measurements:** One of the cm-scale folds in the schist has a hinge with plunge -> trend of 49 -> 070.

**
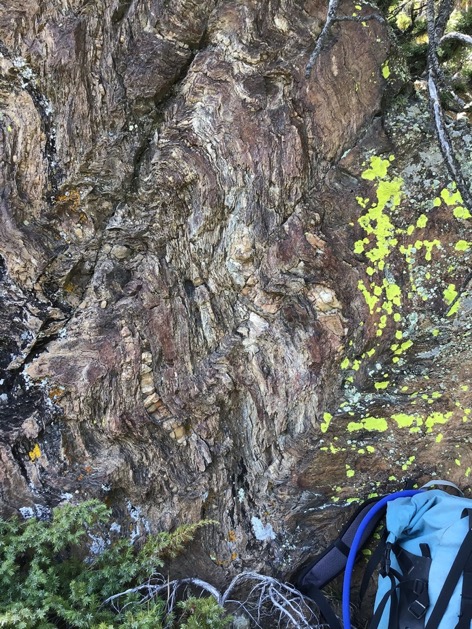
**

**Photo 1.** Looking SW at a steep outcrop face of schist, with prominent folds. The outcrop of quartzite in Photo 2 is to the left.


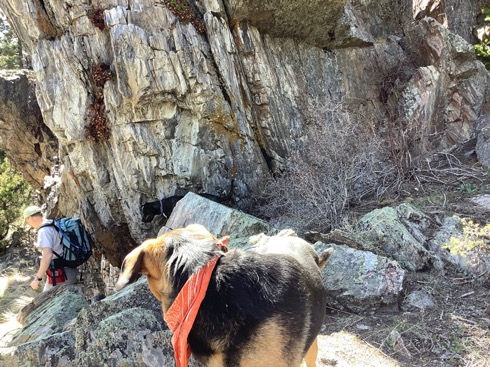


**Photo 2.** Right. Several meter wide band of quartzite with steeply NW-dipping foliation. Looking SW. The outcrop of schist in Photo 1 is to the right.
