# Supplementary material for: Virtual mapping and analytical data integration: A teaching module using Precambrian crystalline basement in Colorado's Front Range (USA)
Source: Copernicus journal article supplement (doi:10.5194/gc-2021-9), 2021-05-05
Supplement: Supplementary file 61 [file GG54.docx]

**GG54**

**Lithology:** Schist, in contact with quartzite.

**General structure:** This schist abundant 1-30 cm thick layers of gray to brown quartzite. The compositional layers in the schist appear to be relict bedding, but the parallel schistosity in the mica-rich layers is penetrative and many of the quartzite layers are isoclinally folded (photo). So, even if the layering is relict bedding, it has clearly now been transposed into a strong tectonic foliation. Less than 10 meters to the northwest of this outcrop is a high cliff of more pure light-colored quartzite, and thus a **possibly mappable contact** exists here.

**Measurements:** The strike,dip of the foliation is 251,67.

**
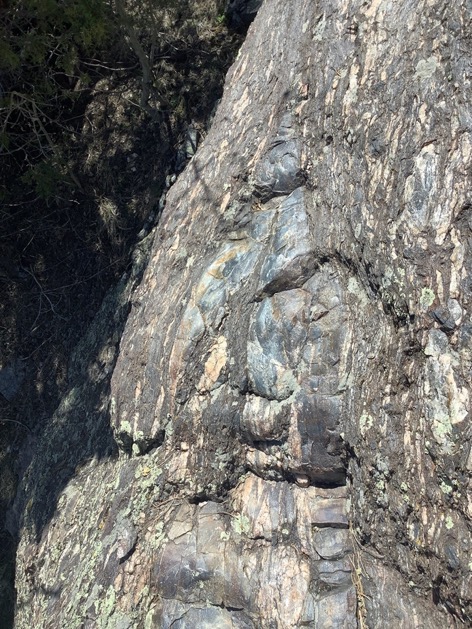
**

**Photo 1.** Looking at a subhorizontal surface of schist, with prominent isoclinal fold of dark gray quartzite; the fold closes towards the top of the image. Northwest is towards top of image. Outcrop width in image is about 1 meter.


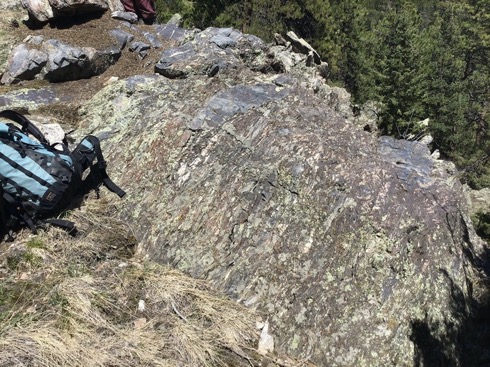


**Photo 2.** Right. Outcrop of schist with foliation dipping to the left. Looking NE. The dark gray quartzite layer just visible on the right side of the outcrop is the same one captured in Photo 1 from the other direction.
