# Supplementary material for: Virtual mapping and analytical data integration: A teaching module using Precambrian crystalline basement in Colorado's Front Range (USA)
Source: Copernicus journal article supplement (doi:10.5194/gc-2021-9), 2021-05-05
Supplement: Supplementary file 63 [file GG56.docx]

**GG56**

**Lithology:** Bt-granodiorite.

**General structure:** The granodiorite is strongly mylonitic here, with a steep NE-SW striking foliation.

**Measurements:** The mylonitic foliation has strike,dip of 068,88 and the stretching lineation has plunge -> trend of 72 -> 223.

**
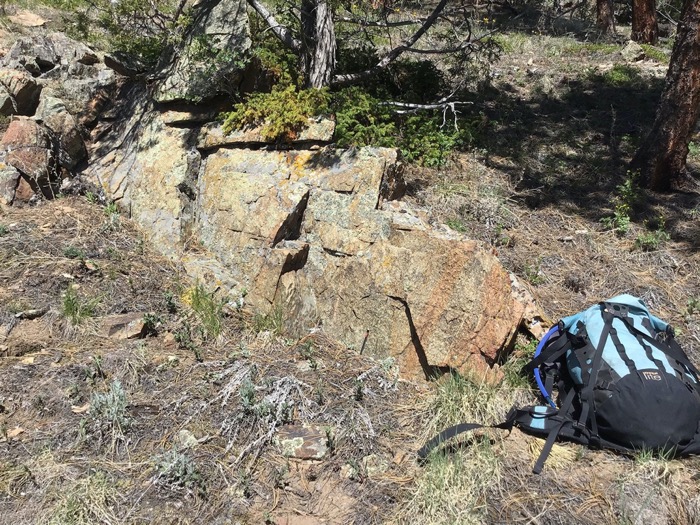
Photo 1.** Left. Outcrop of mylonitic granodiorite. Looking West. The foliation surface is facing the viewer and Photo 2 was taken near the center of the outcrop and near the bottom (note the pencil in both photos).


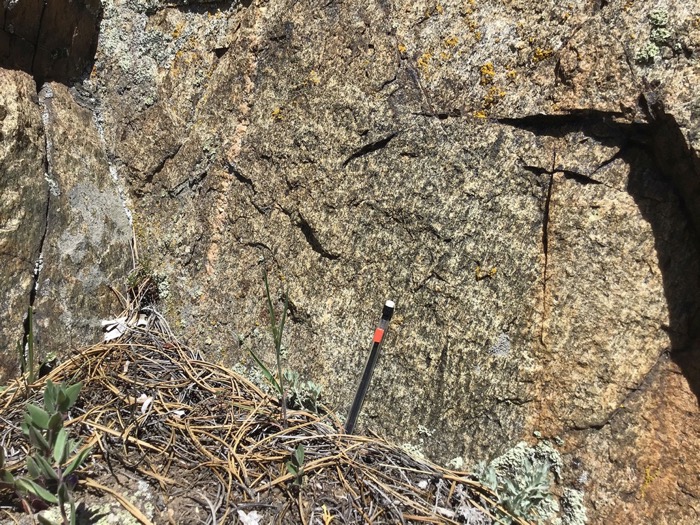
**Photo 2.** Right. Outcrop of mylonitic granodiorite foliation surface where stretching lineation is visible (aligned with pencil). Looking Northwest.
