# Supplementary material for: Virtual mapping and analytical data integration: A teaching module using Precambrian crystalline basement in Colorado's Front Range (USA)
Source: Copernicus journal article supplement (doi:10.5194/gc-2021-9), 2021-05-05
Supplement: Supplementary file 64 [file GG57.docx]

**GG57**

**Lithology:** Bt-granodiorite.

**General structure:** This outcrop is on the east side of a steep N-trending ravine and contains strongly foliated (mylonitic) granodiorite. Several high quality shear sense indicators are observed, including S-C composite fabrics, simple assymetric feldspar porphyroclasts with recrystallized tails (“sigma” clasts) and a fractured feldspar clast with a synthetic micro-fault (photos). All indicate SE-side up shear sense with high confidence (5 on a scale of 1-5).

**Measurements:** The mylonitic foliation has strike,dip of 060,85 and the stretching lineation has plunge -> trend of 74 -> 222.


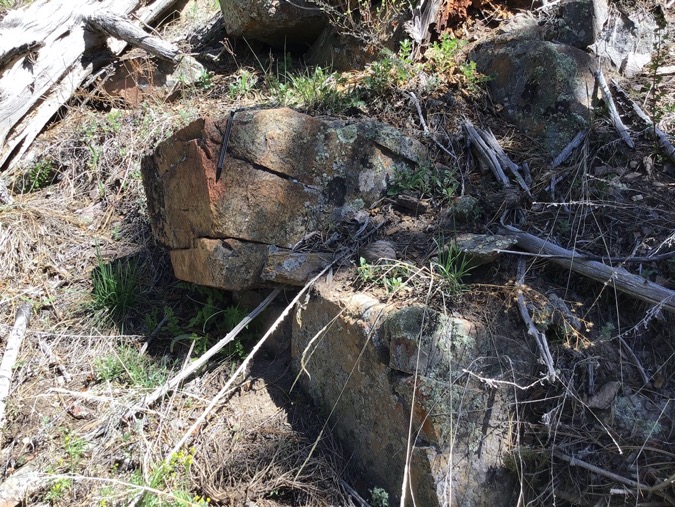


**Photo 1.** Looking North. Note the stretching lineation orientation (pencil) on the side of the outcrop surface (foliation surface). Also, note that Photo 2 was taken looking at the left-facing side of the outcrop surface, which is oriented nearly parallel to the stretching lineation.


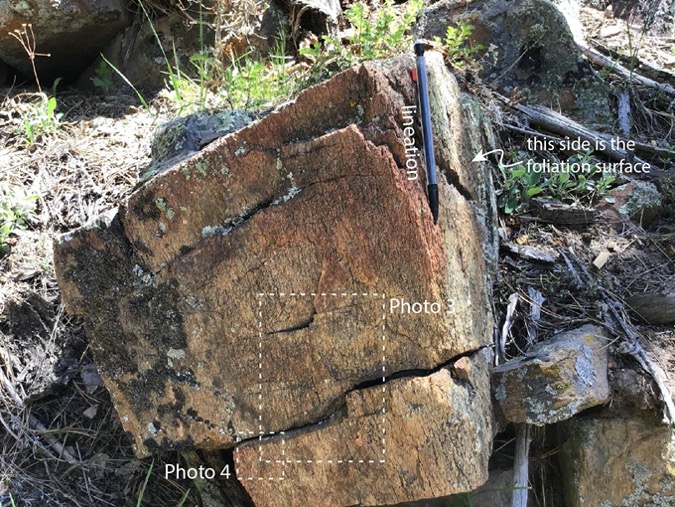


**Photo 2.** Looking NE at the outcrop surface that is oriented perpendicular to the foliation and nearly parallel to the stretching lineation (pencil). The is generally a good orientation to observe shear sense for plane strain. The locations of Photos 3 and 4 are indicated.


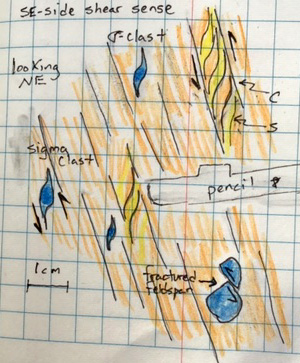

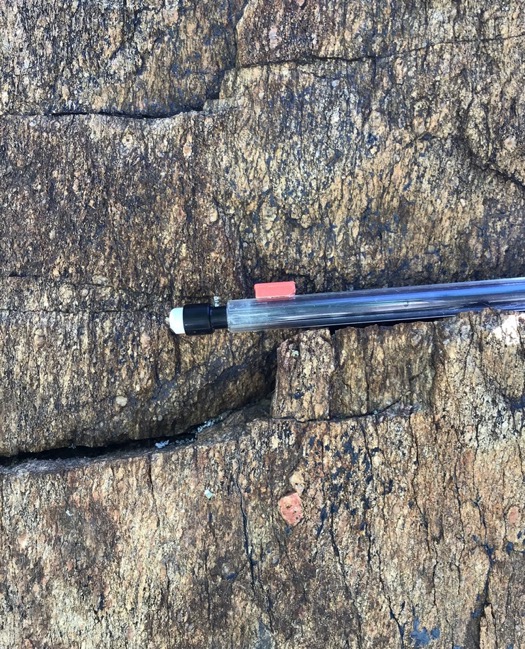
Field sketch of a portion of the surface captured in Photo 3.

**Photo 3.** Looking NE. Note several high quality shear sense indicators including S-C composite fabrics, simple assymetric feldspar porphyroclasts with recrystallized tails (“sigma” clasts) and a fractured feldspar clast with a synthetic micro-fault. All indicate SE-side up shear sense.


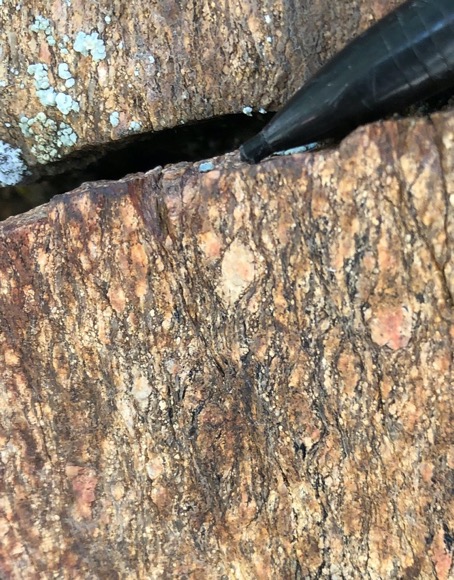


**Photo 4.** Left. Looking NE. Closer view of a simple assymetric feldspar porphyroclasts with recrystallized tails (“sigma” clasts) indicating SE-side up shear sense. This image was taken on the same surface as Photo 3 but down and to the right (see Photo 2 for location).
