# Supplementary material for: Virtual mapping and analytical data integration: A teaching module using Precambrian crystalline basement in Colorado's Front Range (USA)
Source: Copernicus journal article supplement (doi:10.5194/gc-2021-9), 2021-05-05
Supplement: Supplementary file 66 [file GG59.docx]

**GG59**

**Lithology:** Schist.


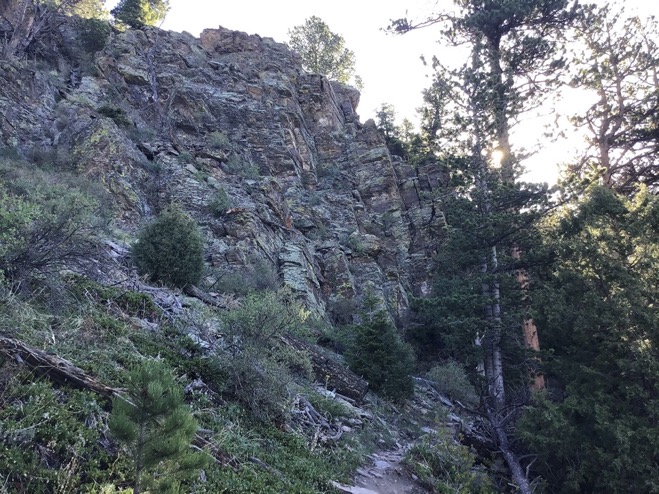
**General structure:**  This outcrop is garnet-andalusite-biotite-muscovite schist with abundant 1-5 cm thick layers of light gray to brown quartzite. The alternating layers of schist and quartzite appear to be relict bedding. However, some of the quartzite layers are isoclinally folded and have axial surfaces that are parallel to the schistosity in adjacent mica-rich layers. This suggests that the prominent layering evident at the outcrop scale is both a relict bedding and a tectonic foliation (the bedding was transposed into the same orientation as the foliation). Additionally, there are numerous dm- to cm-scale upright and shallowly plunging folds of the bedding/schistosity

**Measurements:** The bedding/schistosity strike,dip 345,37. A representative hinge of one of the upright folds has a plunge->trend of 15->060.


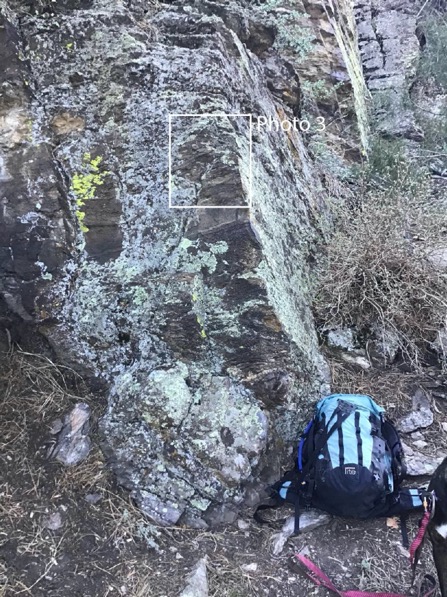
**Photo 1.** Above.Approaching the outcrop. Note the apparent shallow dip of the layering. Looking E.


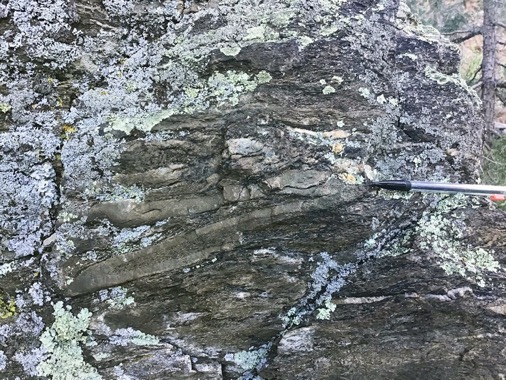
**Photo 2.** Right. The outcrop, looking E. The location of Photo 3 about 1.5 m up the outcrop is indicated.

**Photo 3.** Left. Isoclinal folds of a ~1 cm thick quartzite layer. The axial surface of these folds is parallel to the main schistosity in the outcrop. Pencil tip is near one closure of a fold.
