# Supplementary material for: Virtual mapping and analytical data integration: A teaching module using Precambrian crystalline basement in Colorado's Front Range (USA)
Source: Copernicus journal article supplement (doi:10.5194/gc-2021-9), 2021-05-05
Supplement: Supplementary file 67 [file GG6.docx]

**GG6**

**Lithology:** Quartzite, adjacent to schist.

**General structure:** This outcrop contains quartzite on the NW side with a relatively abrupt transition (contact) to Grt-bearing Ms-Bt schist on SE side, and thus a **possible mappable contact**. The quartzite has cm- to dm-scale layers of grayish white massive quartzite separated by 1-2 cm thick layers of micaceous quartzite. Similarly, the dominant layering in schist is both a compositional banding (schist with thin quartzite layers) that could be relict bedding and also a schistosity in the most micaceous layers. The dominant foliation and layering in both lithologies is very steeply dipping here and the contact is concordant with that foliation. In one part of the schist outcrop, a 4 cm thick quartzite layer is nearly isoclinally folded into a synform/antiform pair with the steep schistosity passing through as an axial planar foliation (sketch).

**
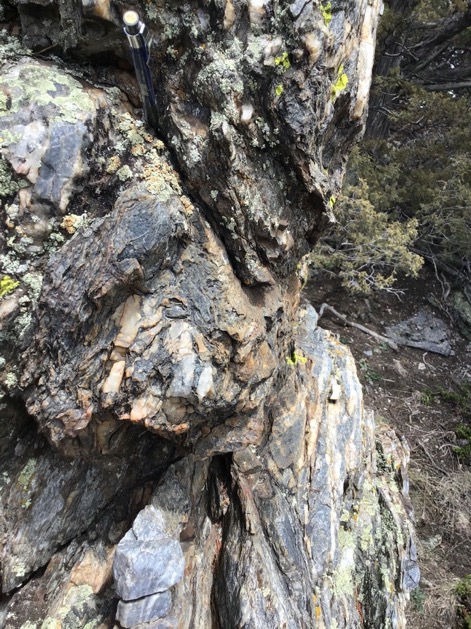
**
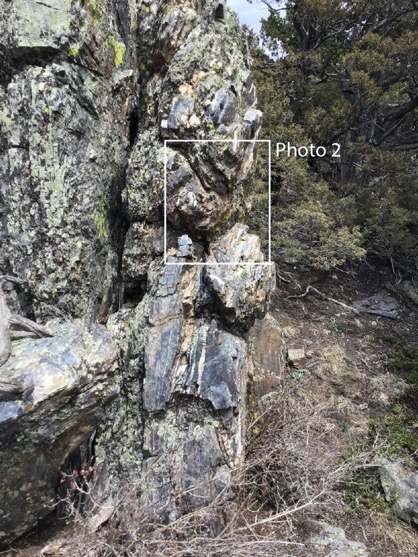
**Measurements:** Bedding (and penetrative foliation) in the quartzite has strike, dip is 060,86. Transposed bedding and penetrative foliation in the schist has strike, dip is 048,89.

**Photo 1.** General view of outcrop looking NE. Note the steeply dipping overall layering.


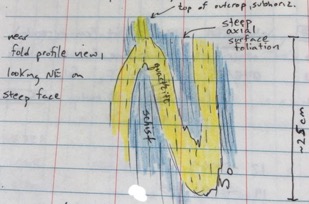
**Photo 2.** Close view of near isoclinal

folds of quartzite in the schist (not the one sketched). Note the pencil for scale in upper left oriented subparallel to hinge of folds. Looking NE.

Field sketch
