# Supplementary material for: Virtual mapping and analytical data integration: A teaching module using Precambrian crystalline basement in Colorado's Front Range (USA)
Source: Copernicus journal article supplement (doi:10.5194/gc-2021-9), 2021-05-05
Supplement: Supplementary file 68 [file GG60.docx]

**GG60**

**Lithology:** Bt-granodiorite

**General structure:** The granodiorite is weakly foliated here with local cm-scale zones of more strongly foliated protomylonite. In the latter zones, a moderately developed stretching lineation is defined by smeared feldspar. Some asymmetric porphyroclasts of feldspar (sigma clasts) indicate SE-side-up sense of shear with good confidence (4 on a scale of 1 for highest and 5 for lowest).

**Measurements:** The protomylonitic foliation strike,dip is 065,60 and the lineation plunge -> trend is 40 -> 220.
