# Supplementary material for: Virtual mapping and analytical data integration: A teaching module using Precambrian crystalline basement in Colorado's Front Range (USA)
Source: Copernicus journal article supplement (doi:10.5194/gc-2021-9), 2021-05-05
Supplement: Supplementary file 69 [file GG61.docx]

**GG61**

**Lithology:** Bt-granodiorite

**General structure:** The granodiorite is moderately foliated here with local cm-scale zones of more strongly foliated protomylonite. In the latter zones, a well-developed stretching lineation is defined by smeared feldspar. An earlier weak foliation that may be magmatic is asymmetrically deflected into the steeper mylonitic foliation, indicating **SE-side-up sense of shear** with moderate confidence (3 on a scale of 1 for highest and 5 for lowest).

**Measurements:** The protomylonitic foliation strike,dip is 037,79 and the lineation plunge -> trend is 60 -> 191.
