# Supplementary material for: Virtual mapping and analytical data integration: A teaching module using Precambrian crystalline basement in Colorado's Front Range (USA)
Source: Copernicus journal article supplement (doi:10.5194/gc-2021-9), 2021-05-05
Supplement: Supplementary file 70 [file GG62.docx]

**GG62**

**Lithology:** Bt-granodiorite

**General structure:** This outcrop, just off of the Burro Trail, displays strongly foliated (mylonitic) granodiorite with a well-developed stretching lineation defined by smeared quartz and feldspar. Several asymmetric porphyroclasts indicate **SE-side-up sense of shear** with fairly high confidence (confidence 4 on a scale of 1 to 5).

**Measurements:** Mylonitic foliation in the granodiorite has strike, dip is 243,89. The stretching lineation plunge -> trend is 76 -> 270.
