# Supplementary material for: Virtual mapping and analytical data integration: A teaching module using Precambrian crystalline basement in Colorado's Front Range (USA)
Source: Copernicus journal article supplement (doi:10.5194/gc-2021-9), 2021-05-05
Supplement: Supplementary file 71 [file GG63.docx]

**GG63**

**Lithology:** Quartzite, adjacent to Bt-granodiorite

**General structure:**  Light to dark gray quartzite with layers of variable color. Local quartz-pebble conglomeratic horizons are common, particularly at the northwesternmost outcrops (photo). The colored layers and transition to conglomeratic horizons suggest this is relict bedding, but the observation that many of the pebbles appear flattened (photo) the layering may also be a tectonic foliation. Some of the quartz pebbles are noticeably stretched within the layering plane (photo). About 5 meters to the NW is an outcrop of Bt-granodiorite, so a **probable mappable contact** here.

**Measurements:** Bedding/foliation in the quartzite has strike, dip 069,46. The stretching lineation from pebbles has plunge -> trend of 28 -> 209.


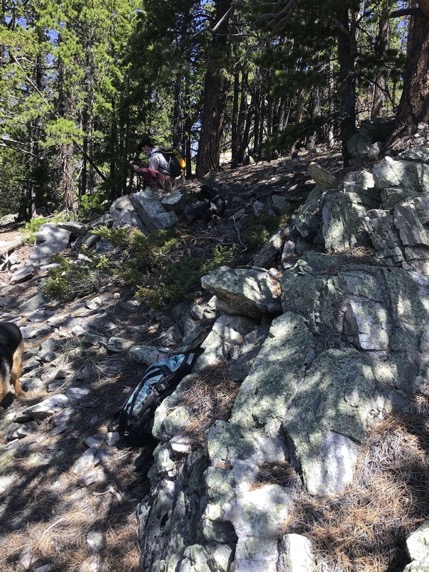


**Photo 1.** Left. View looking N at scattered outcrops of quartzite. The layering is dipping to the right (SE) and the geologist is sitting on structurally lower outcrops with conglomeratic horizons. A few meters beyond the geologist are outcrops of granodiorite.


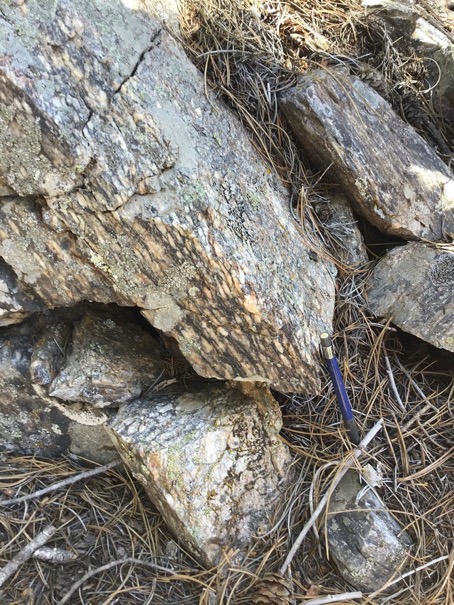


**Photo 2.** Right. Conglomeratic quartzite showing flattened white pebbles. Pencil is parallel to long axis. Rock is slightly shifted out of place.


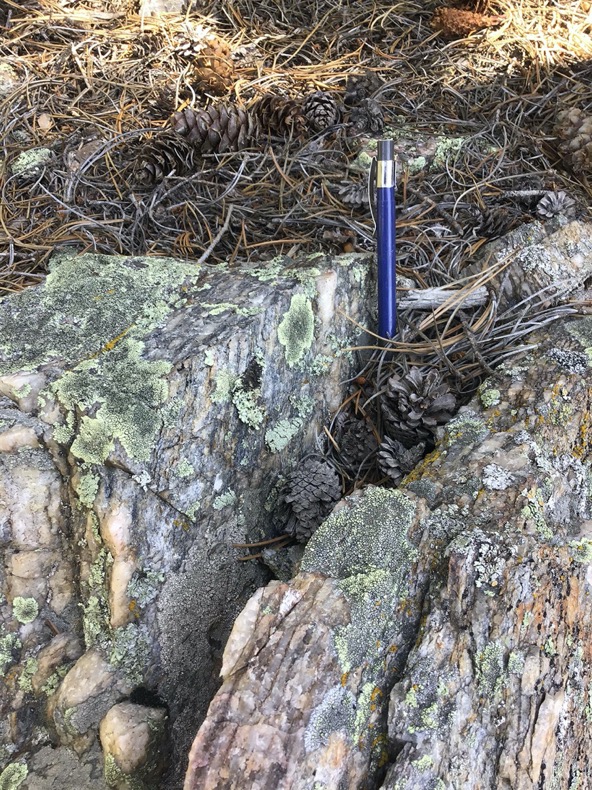


**Photo 3.** Conglomeratic quartzite showing stretched white pebbles. Pencil is parallel to long axis. Rock is slightly shifted out of place.
