# Supplementary material for: Virtual mapping and analytical data integration: A teaching module using Precambrian crystalline basement in Colorado's Front Range (USA)
Source: Copernicus journal article supplement (doi:10.5194/gc-2021-9), 2021-05-05

**GG64**

**Lithology:** Schist.

**General structure:** This Grt-And-Ms schist has abundant 1-5 cm thick layers of light gray to brown quartzite alternating with schist, which probably represents a relict bedding. But the parallel schistosity in the mica-rich layers is penetrative and so likely a tectonic foliation, meaning that the bedding has been transposed into the orientation of the penetrative schistosity. This is supported by the presence of a prominent stretching lineation defined by smeared quartz ribbons visible on the surface of one of the quartzite layers. Cm-scale upright folds are common throughout the outcrop, but the general orientation of the composite bedding/schistosity dips quite shallowly.

**Measurements:** The bedding/schistosity has variable strike and dip due to the folding, but a representative measurement for the whole outcrop has strike, dip of 285,20. The stretching lineation has a plunge -> trend of 04 -> 020. The hinge of one of the cm-scale upright folds has a plunge -> trend of 28 -> 079.


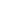

Supplement: Supplementary file 72 [file GG64.docx]
