# Supplementary material for: Virtual mapping and analytical data integration: A teaching module using Precambrian crystalline basement in Colorado's Front Range (USA)
Source: Copernicus journal article supplement (doi:10.5194/gc-2021-9), 2021-05-05
Supplement: Supplementary file 74 [file GG66.docx]

**GG66**

**Lithology:** Bt-granodiorite

**General structure:** This outcrop of granodiorite has a weakly developed foliation defined by biotite alignment.

**Measurements:** The foliation strike, dip is 060,72.
