# Supplementary material for: Virtual mapping and analytical data integration: A teaching module using Precambrian crystalline basement in Colorado's Front Range (USA)
Source: Copernicus journal article supplement (doi:10.5194/gc-2021-9), 2021-05-05
Supplement: Supplementary file 75 [file GG67.docx]

**GG67**

**Lithology:** Quartzite, adjacent to schist.

**General structure:** This quartzite has a prominant layering defined by cm-scale bands of slightly lighter and darker shades of white and gray, and by 1-2 cm thick layers with slightly more mica. The layering could be interpreted to represent bedding. Some layers show the trace of a more steeply dipping penetrative foliation that is oblique to the layering, defined by wispy alternating layers of slightly differently colored quartz. The outcrop contains a transitional contact over 1-2 m to dominantly schist with 1-5 cm thick layers of quartzite. This could be a **potentially mappable contact** with quartzite on the west and schist on the east.

**Measurements:** The bedding/layering strike, dip is 010,29. The steeper foliation that is oblique to the layering has strike, dip is 037,60.
