# Supplementary material for: Virtual mapping and analytical data integration: A teaching module using Precambrian crystalline basement in Colorado's Front Range (USA)
Source: Copernicus journal article supplement (doi:10.5194/gc-2021-9), 2021-05-05
Supplement: Supplementary file 76 [file GG68.docx]

**GG68**

**Lithology:** Quartzite

**General structure:**  Light to bluish gray quartzite with layers of variable color. The colored layers suggest this is relict bedding, but streaks of quartz and mica on the layer surface suggest a tectonic stretching lineation.

**Measurements:** Bedding/layering has strike, dip 044,43. The stretching lineation has plunge -> trend of 31 -> 184.


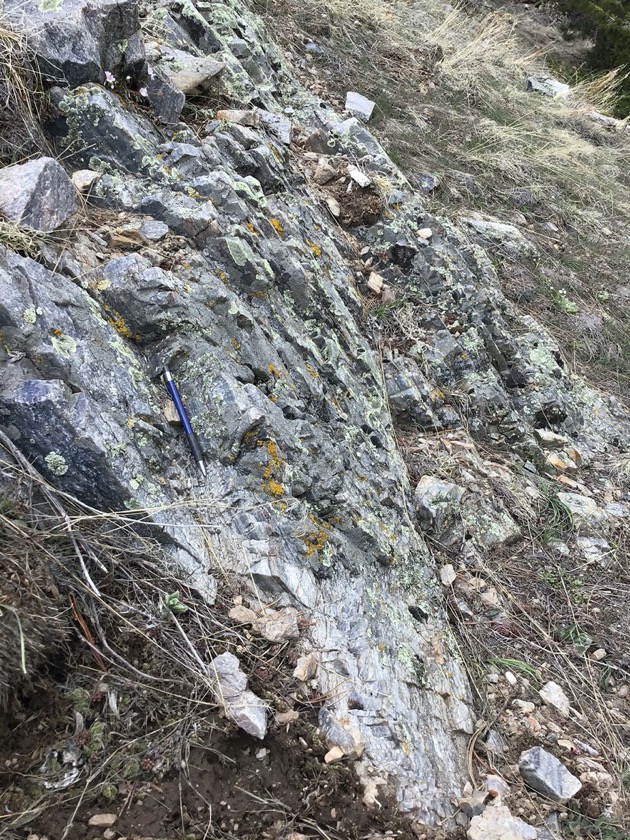


**Photo 1.** View looking NE. The layering is dipping to the right (SE). The pencil is aligned parallel to the trace of the layering.
