# Supplementary material for: Virtual mapping and analytical data integration: A teaching module using Precambrian crystalline basement in Colorado's Front Range (USA)
Source: Copernicus journal article supplement (doi:10.5194/gc-2021-9), 2021-05-05
Supplement: Supplementary file 77 [file GG69.docx]

**GG69**

**Lithology:** Bt-granodiorite, adjacent to quartzite.

**General structure:** The granodiorite is weakly foliated here with no recognizable lineation. Less than 10 meters to the East is quartzite outcrop, indicating an **approximate mappable contact**.

**Measurements:** The foliation in the granodiorite has strike,dip of 035,67.
