# Supplementary material for: Virtual mapping and analytical data integration: A teaching module using Precambrian crystalline basement in Colorado's Front Range (USA)
Source: Copernicus journal article supplement (doi:10.5194/gc-2021-9), 2021-05-05

**GG7**

**Lithology:** Muscovite-bearing pegmatitic granite.

**General structure:** This granite outcrop has a moderately developed foliation.

**Measurements:** The bedding/foliation has typical strike,dip 063,44.


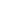

Supplement: Supplementary file 78 [file GG7.docx]
