# Supplementary material for: Virtual mapping and analytical data integration: A teaching module using Precambrian crystalline basement in Colorado's Front Range (USA)
Source: Copernicus journal article supplement (doi:10.5194/gc-2021-9), 2021-05-05
Supplement: Supplementary file 80 [file GG71.docx]

**GG71**

**Lithology:** Bt-granodiorite, adjacent to quartzite.

**General structure:** This outcrop displays strongly foliated (mylonitic) granodiorite with a well-developed stretching lineation defined by smeared quartz and feldspar. Several asymmetric porphyroclasts indicate **SE-side-up sense of shear** with fairly high confidence (confidence 4 on a scale of 1 to 5). An outcrop about 2 meters away to the NW is quartzite with a similarly oriented foliation, indicating a **contact** between the two lithologies. The quartzite is also strongly mylonitized with a well-developed stretching lineation defined by smeared quartz and alignment of white mica (so also a mineral lineation). Asymmetric extension of a slightly darker quartzite layer about 2 cm thick suggests **SE-side-up sense of shear** but at lower confidence than the indicators observed in the granodiorite (this is 2 on a scale from 1-5).

**Measurements:** Mylonitic foliation in the granodiorite has strike, dip is 073,80. The stretching lineation plunge -> trend is 74 -> 236.
