# Supplementary material for: Virtual mapping and analytical data integration: A teaching module using Precambrian crystalline basement in Colorado's Front Range (USA)
Source: Copernicus journal article supplement (doi:10.5194/gc-2021-9), 2021-05-05
Supplement: Supplementary file 82 [file GG73.docx]

**GG73**

**Lithology:** Bt-granodiorite

**General structure:** This granodiorite has a weak foliation defined by biotite alignment and light colored streaks of quartz and feldspar. The foliation is not mylonitic in that there are not abundant tails of recrystallized material around phenocrysts. There is no recognizable lineation.

**Measurements:** The foliation strike, dip is 042,43.


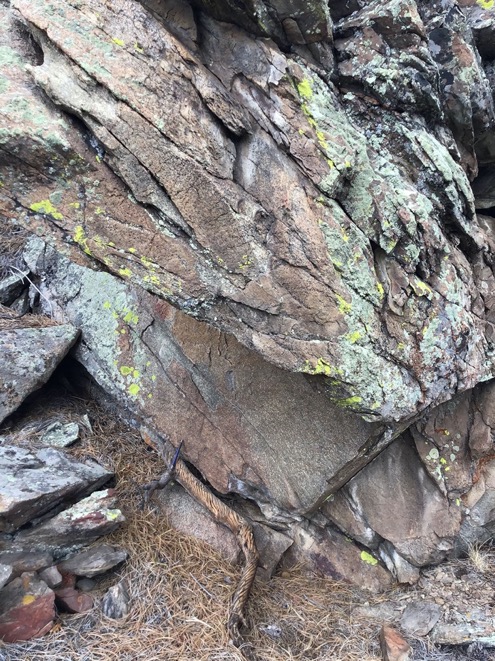


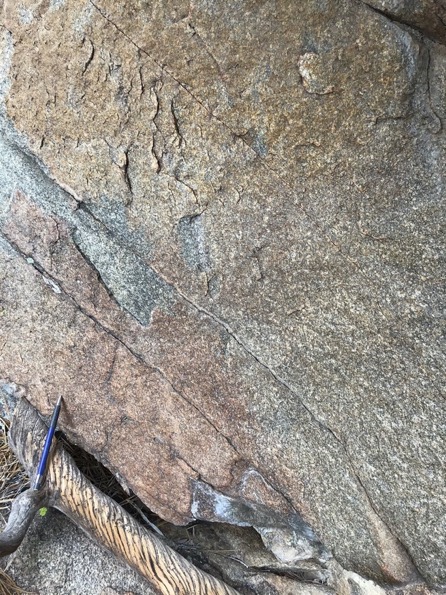
**Photo 1.** Left. Outcrop of weakly foliated granodiorite. Pencil for scale.

**Photo 2.** Right. Closer view of weak foliation in granodiorite, the trace of which runs obliquely across the face from lower right to upper left. Pencil for scale is not parallel to the foliation trace.
