# Supplementary material for: Virtual mapping and analytical data integration: A teaching module using Precambrian crystalline basement in Colorado's Front Range (USA)
Source: Copernicus journal article supplement (doi:10.5194/gc-2021-9), 2021-05-05
Supplement: Supplementary file 83 [file GG74.docx]

**GG74**

**Lithology:** Quartzite, adjacent to schist.

**General structure:**  This outcrop is mostly light gray quartzite but the northern part of the outcrop is schist with 1-5 cm thick layers of light gray to brown quartzite. This suggests a **possibly mappable contact**. The compositional layers in the schist appear to be relict bedding, but the parallel schistosity in the mica-rich layers is penetrative and so likely a tectonic foliation.

**Measurements:** The bedding/foliation strike, dip is 041,53.


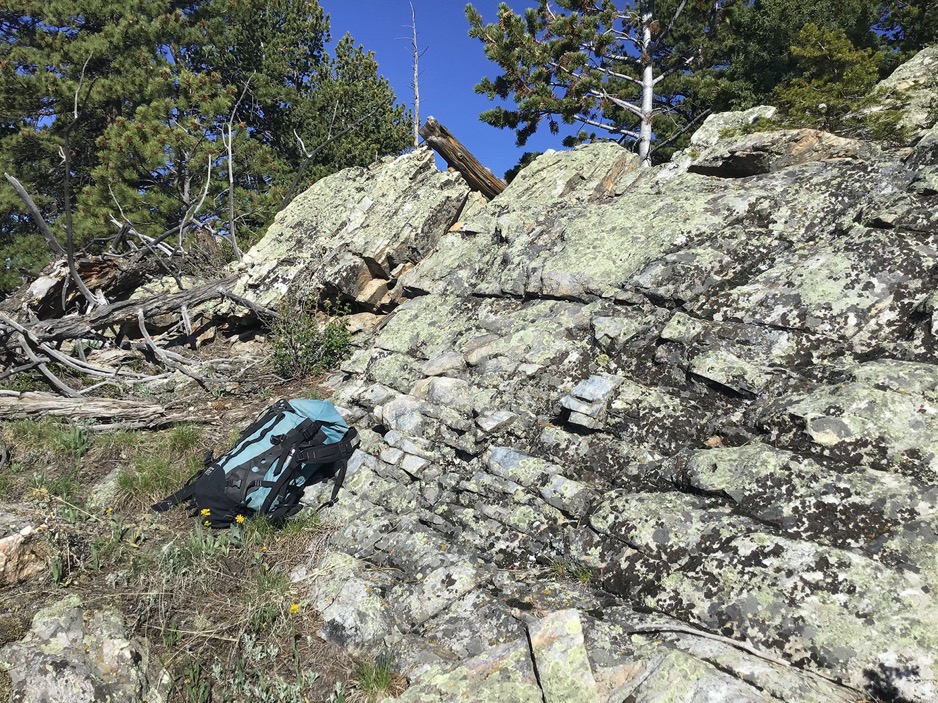


**Photo 1.** Outcrop looking West. The left-dipping surface of the outcrop is close to the bedding/foliation surface.
