# Supplementary material for: Virtual mapping and analytical data integration: A teaching module using Precambrian crystalline basement in Colorado's Front Range (USA)
Source: Copernicus journal article supplement (doi:10.5194/gc-2021-9), 2021-05-05
Supplement: Supplementary file 84 [file GG75.docx]

**GG75**

**Lithology:** Schist

**General structure:**  This outcrop of Bt-Ms-schist has abundant 1-5 cm thick layers of light gray to brown quartzite. The alternating layers of schist and quartzite appear to be relict bedding. However, the schistosity in adjacent mica-rich layers is penetrative so the main layering is also a tectonic foliation. Additionally, there are numerous dm- to cm-scale upright and shallowly plunging folds of the bedding/schistosity. On the surface of the foliation, a mineral and stretching lineation is visible and defined by streaks of quartz, white mica flakes, and a tiny black needle-like mineral that could be tourmaline. These lineations are oblique to the hinges of the upright folds and so they have variable orientations depending on which limb of a fold they occur.

**Measurements:** A typical orientation for the bedding/schistosity is strike,dip 052,47. The stretching lineation on this surface has plunge -> trend of 40 -> 205. The hinge of one of the folds has a plunge -> trend of 21 -> 073.
