# Supplementary material for: Virtual mapping and analytical data integration: A teaching module using Precambrian crystalline basement in Colorado's Front Range (USA)
Source: Copernicus journal article supplement (doi:10.5194/gc-2021-9), 2021-05-05
Supplement: Supplementary file 85 [file GG76.docx]

**GG76**

**Lithology:** Schist.

**General structure:** This locality has several small outcrops of Garnet-biotite-muscovite schist. The compositional layers in the schist appear to be relict bedding, but the parallel schistosity is penetrative and so likely a tectonic foliation. A white mica mineral lineation is also present. Centimeter-scale inclined and shallowly plunging folds locally occur.

**Measurements:** The bedding/schistosity strike,dip 047,42. The mineral lineation in the schist has a plunge -> trend of 26 -> 194. The axial surface of one of the inclined folds has strike,dip is 265,59. The hinge of the fold has a plunge -> trend of 09 -> 060.
