# Supplementary material for: Virtual mapping and analytical data integration: A teaching module using Precambrian crystalline basement in Colorado's Front Range (USA)
Source: Copernicus journal article supplement (doi:10.5194/gc-2021-9), 2021-05-05
Supplement: Supplementary file 86 [file GG77.docx]

**GG77**

**Lithology:** Schist, in contact with quartzite.

**General structure:** This outcrop is mostly Garnet-andalusite-biotite-muscovite schist (with abundant 1-5 cm thick layers of light gray to brown quartzite). However, the southern part of the outcrop is pure quartzite, which suggests a **possibly mappable contact** between schist to the NW and quartzite to the SE. The compositional layers in the schist appear to be relict bedding, but the parallel schistosity in the mica-rich layers is penetrative and so likely a tectonic foliation. Centimeter-scale upright folds of the bedding/schistosity are common.

**Measurements:** The bedding/schistosity strike,dip 053,64. The axial surface of one of the upright folds has strike,dip is 225,83.
