# Supplementary material for: Virtual mapping and analytical data integration: A teaching module using Precambrian crystalline basement in Colorado's Front Range (USA)
Source: Copernicus journal article supplement (doi:10.5194/gc-2021-9), 2021-05-05
Supplement: Supplementary file 87 [file GG78.docx]

**GG78**

**Lithology:** Light gray quartzite adjacent to foliated Bt-granodiorite.

**General structure:** This locality has small outcrops that can be used to approximate the contact between quartzite to the S and granodiorite to the N to within ~5 meters. Abundant pieces of quartzite float are conglomeratic.

**Measurements:** The bedding/layering in the quartzite has strike, dip is 033,69.


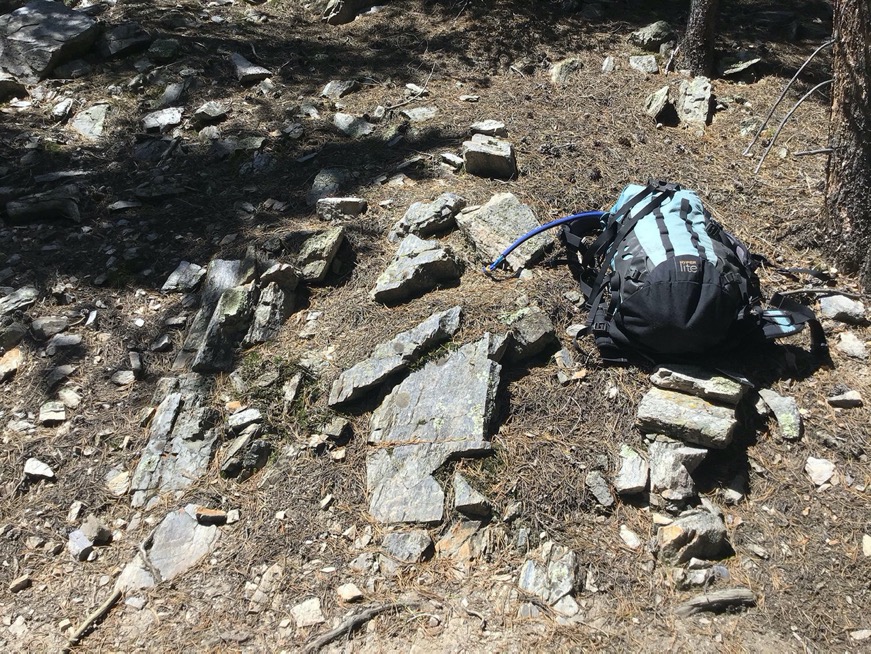


**Photo 1.** This view has a lot of obvious quartzite float, but the pieces indicated with a start

including the larger rock in bottom center are thought to be in place based on the similarity in orientation of the layering/foliation. Upslope and SW is towards top of photo. The edge of the Burro Trail is at the bottom of the photo.
