# Supplementary material for: Virtual mapping and analytical data integration: A teaching module using Precambrian crystalline basement in Colorado's Front Range (USA)
Source: Copernicus journal article supplement (doi:10.5194/gc-2021-9), 2021-05-05

**GG79**

**Lithology:** Schist, adjacent to quartzite.

**General structure:** This outcrop has a **possibly mappable contact** between quartzite on the SE side and schist on the NW. The schist has abundant 1-5 cm thick layers of light gray to brown quartzite alternating with schist, which probably represents a relict bedding. But the parallel schistosity in the mica-rich layers is penetrative and so likely a tectonic foliation, meaning that the bedding has been transposed into the orientation of the penetrative schistosity. This layering is steeply dipping here. The quartzite appears to be very strongly foliated to the point of being characterized as a mylonite.

**Measurements:** The bedding/foliation in the schist has a strike, dip of 255,72.


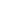

Supplement: Supplementary file 88 [file GG79.docx]
