# Supplementary material for: Virtual mapping and analytical data integration: A teaching module using Precambrian crystalline basement in Colorado's Front Range (USA)
Source: Copernicus journal article supplement (doi:10.5194/gc-2021-9), 2021-05-05

**GG8**

**Lithology:** Bt-granodiorite

**General structure:** This medium grained Bt-granodiorite has a weak foliation defined by feldspar phenocrysts and biotite. It may be a magmatic foliation.

**Measurements:** The foliation has a strike,dip 006,21.


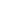

Supplement: Supplementary file 89 [file GG8.docx]
