# Supplementary material for: Virtual mapping and analytical data integration: A teaching module using Precambrian crystalline basement in Colorado's Front Range (USA)
Source: Copernicus journal article supplement (doi:10.5194/gc-2021-9), 2021-05-05
Supplement: Supplementary file 90 [file GG80.docx]

**GG80**

**Lithology:** Schist, adjacent to quartzite.

**General structure:** This spectacular outcrop has Grt-Ms schist making up the lower half and massive layered quartzite on the top (photo), making a **possibly mappable contact** (quartzite should show on map to the NE and schist to SW). The schist has abundant 1-5 cm thick layers of light gray to brown quartzite alternating with schist, which probably represents a relict bedding. But the parallel schistosity in the mica-rich layers is penetrative and so likely a tectonic foliation, meaning that the bedding has been transposed into the orientation of the penetrative schistosity. Cm-scale upright folds are common throughout the outcrop, but the general orientation of the composite bedding/schistosity (the approximate enveloping surface) dips quite shallowly.

**Measurements:** The bedding/schistosity has variable strike and dip due to the folding. One set of measurements on different fold limbs are 038,30 and 280,14. If you choose to only plot one on the map, choose the latter as it is more representative of the whole outcrop. A representative cm-scale fold has axial surface strike, dip of 074,86 and a hinge plunge -> trend of 27 -> 074.


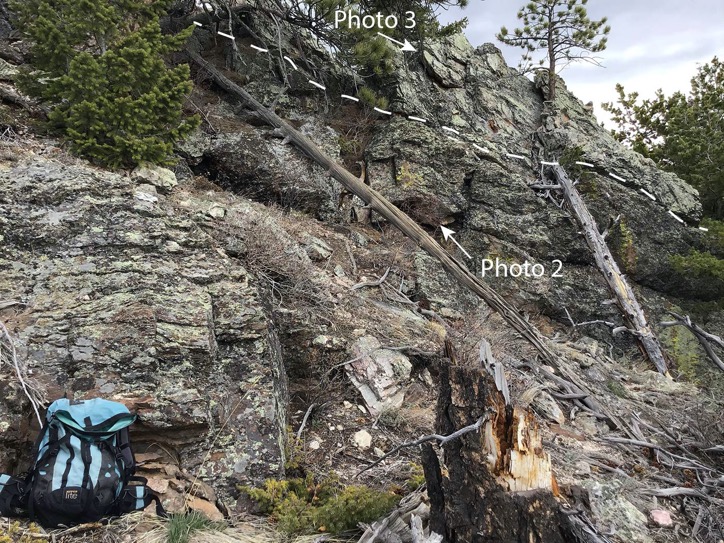


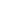


**Photo 1.** This view is generally looking Northeast. The outcrop has schist in the bottom half and quartzite on top, the contact approximated by the white line. The locations of Photos 2 and 3 are indicated.


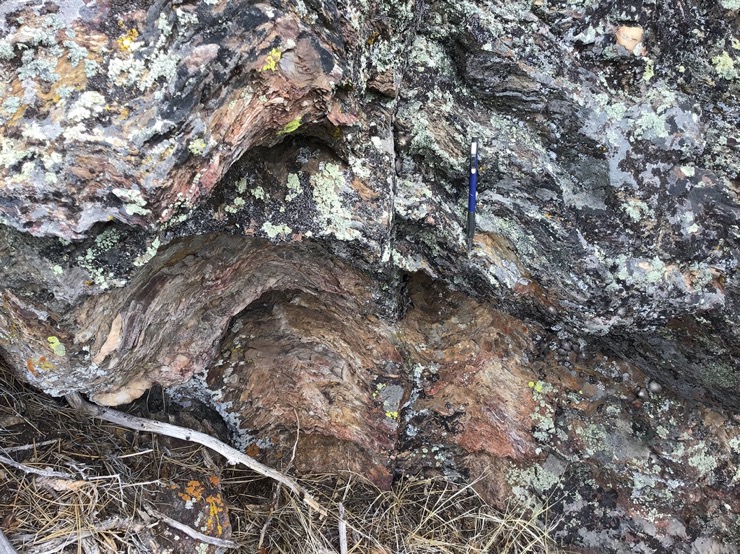


**Photo 2.** This view is a close up of the schist, looking NE. It is approximately a profile view of the folds. The pencil is aligned approximately with the axial trace.


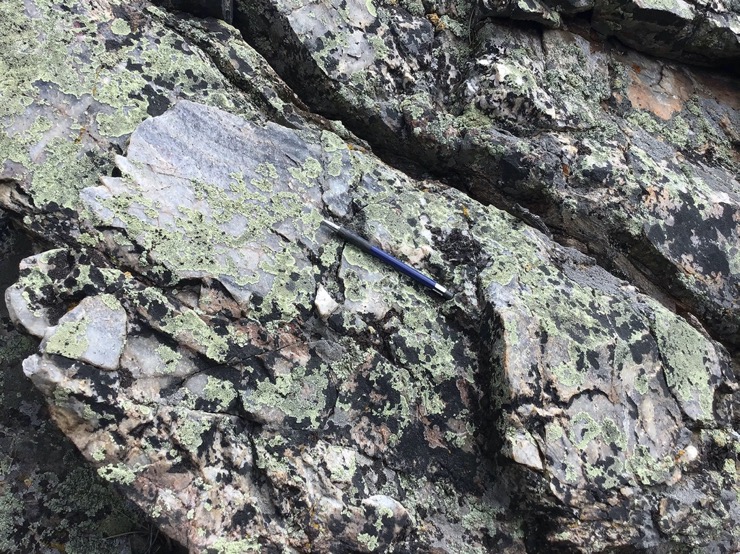


**Photo 3.** This view is looking NE. The pencial is parallel to the multicolored layering in the quartzite.
