# Supplementary material for: Virtual mapping and analytical data integration: A teaching module using Precambrian crystalline basement in Colorado's Front Range (USA)
Source: Copernicus journal article supplement (doi:10.5194/gc-2021-9), 2021-05-05
Supplement: Supplementary file 91 [file GG81.docx]

**GG81**

**Lithology:** Schist, adjacent to quartzite.

**General structure:** This is a large outcrop that has a contact between quartzite on the NW side and schist on the SE. The schist has abundant 1-5 cm thick layers of light gray to brown quartzite alternating with schist, which probably represents a relict bedding. But the parallel schistosity in the mica-rich layers is penetrative and so likely a tectonic foliation, meaning that the bedding has been transposed into the orientation of the penetrative schistosity. This layering is steeply dipping here.

**Measurements:** The layering/schistosity has strike,dip of 054,86.


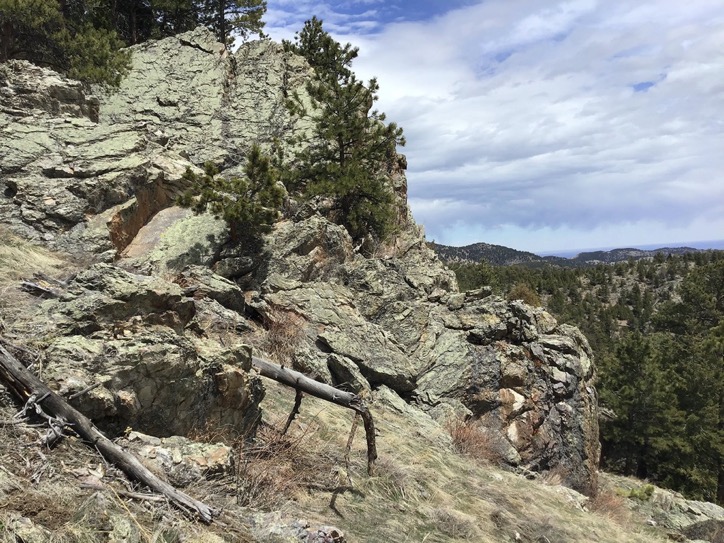


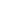


**Photo 1.** This view is looking Northeast. Most of the outcrop is quartzite on the left (NW) with about a 2 meter wide section of schist on the right side (darker brown). Photo 2 was taken at the far right side of this crop.


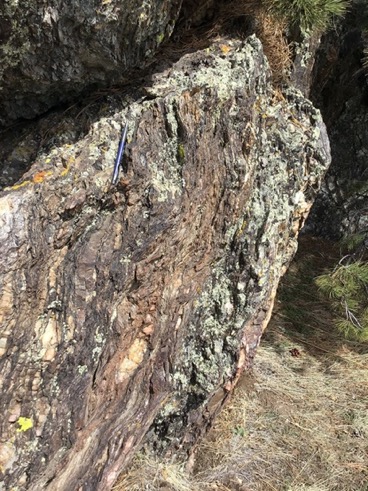


**Photo 2.** This view is a close up of the schist, looking NE.
