# Supplementary material for: Virtual mapping and analytical data integration: A teaching module using Precambrian crystalline basement in Colorado's Front Range (USA)
Source: Copernicus journal article supplement (doi:10.5194/gc-2021-9), 2021-05-05

**GG82**

**Lithology:** Schist, adjacent to quartzite.

**General structure:** This outcrop that has a **possibly mappable contact** between quartzite on the NW side and schist on the SE. The schist has abundant 1-5 cm thick layers of light gray to brown quartzite alternating with schist, which probably represents a relict bedding. But the parallel schistosity in the mica-rich layers is penetrative and so likely a tectonic foliation, meaning that the bedding has been transposed into the orientation of the penetrative schistosity. This layering is steeply dipping here. The very straight layering and locally stretched apart quartzite layers (boudinage) suggests relatively high strain accumulated in this orientation.

**Measurements:** The foliation strike,dip is 061,78.


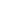

Supplement: Supplementary file 92 [file GG82.docx]
