# Supplementary material for: Virtual mapping and analytical data integration: A teaching module using Precambrian crystalline basement in Colorado's Front Range (USA)
Source: Copernicus journal article supplement (doi:10.5194/gc-2021-9), 2021-05-05
Supplement: Supplementary file 93 [file GG83.docx]

**GG83**

**Lithology:** Bt-granodiorite.

**General structure:** This outcrop of granodiorite, in a narrow ravine, is strongly foliated.

**Measurements:** The foliation strike, dip is 070,60.


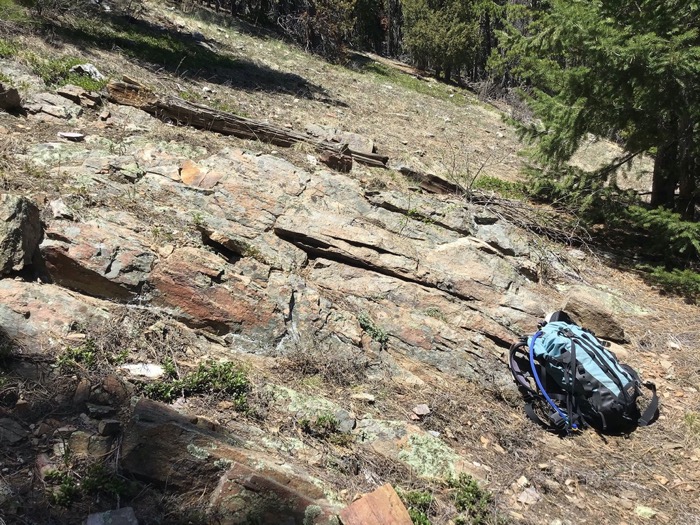


**Photo 1.** Outcrop of foliated granodiorite, looking north.
