# Supplementary material for: Virtual mapping and analytical data integration: A teaching module using Precambrian crystalline basement in Colorado's Front Range (USA)
Source: Copernicus journal article supplement (doi:10.5194/gc-2021-9), 2021-05-05
Supplement: Supplementary file 95 [file GG85.docx]

**GG85**

**Lithology:** Schist, adjacent to quartzite

**General structure:** This locality is along the eastern section of the Burro trail. There is no in place outcrop (so no measurements) but the dominance of float lithology changes abruptly over a several meter distance, suggesting a potentially mappable contact between schist to the NW (photo) and quartzite to the SE (photo) to within about 10 meters. The schist locally contains garnet (photo).

**Measurements:** No measurement made here.


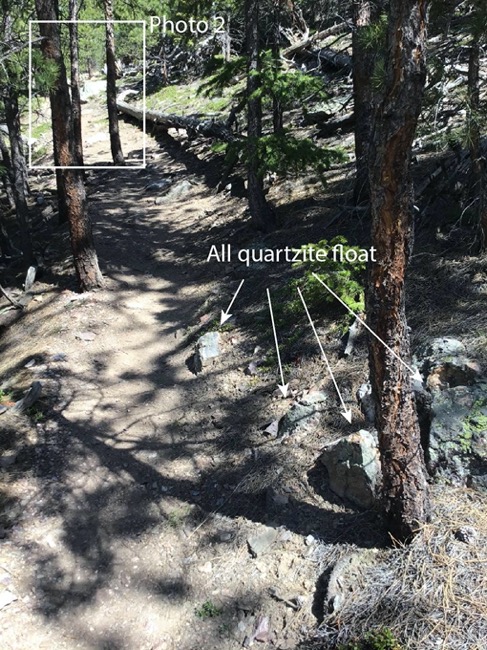


**Photo 1.** Left. Float blocks of quartzite, looking northwest.


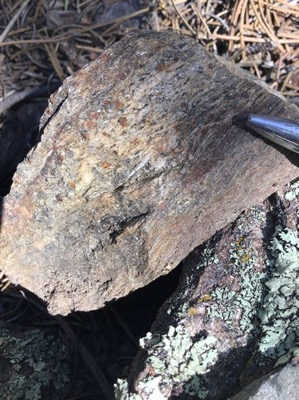

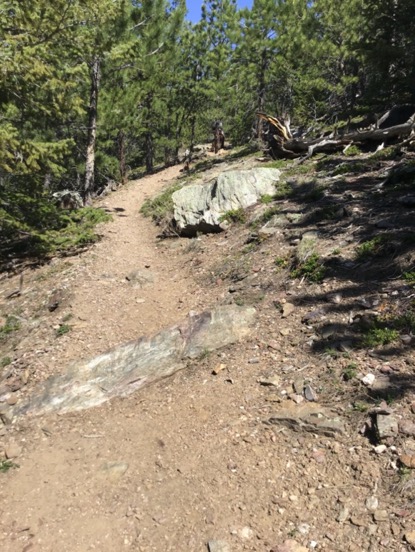
**Photo 2.** Below. Float blocks of all schist, looking northwest.

**Photo 3.** Left Garnet porphyroblasts in schist.
