# Supplementary material for: Virtual mapping and analytical data integration: A teaching module using Precambrian crystalline basement in Colorado's Front Range (USA)
Source: Copernicus journal article supplement (doi:10.5194/gc-2021-9), 2021-05-05
Supplement: Supplementary file 96 [file GG86.docx]

**GG86**

**Lithology:** Schist.

**General structure:** The steeply dipping schist here has abundant 1-5 cm thick layers of light gray to brown quartzite alternating with schist, which probably represents a relict bedding. But the parallel schistosity in the mica-rich layers is penetrative and so likely a tectonic foliation. That this foliation may represent a relatively high degree of strain is suggested by the common presence of long thin and discontinuous lenses of white quartz; they appear to have been quartz veins that have been pulled apart (boudinage). See Photo 2 for examples.

**Measurements:** The bedding/schistosity has strike,dip 260,84.


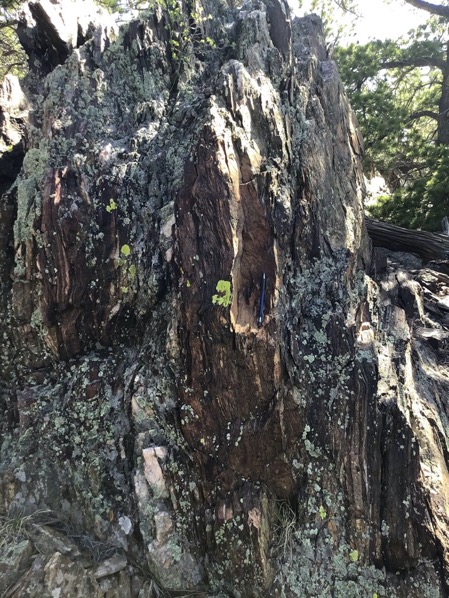


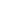


**Photo 1.** Left. This view is looking Northeast at the steeply dipping schist. Pencil for scale.


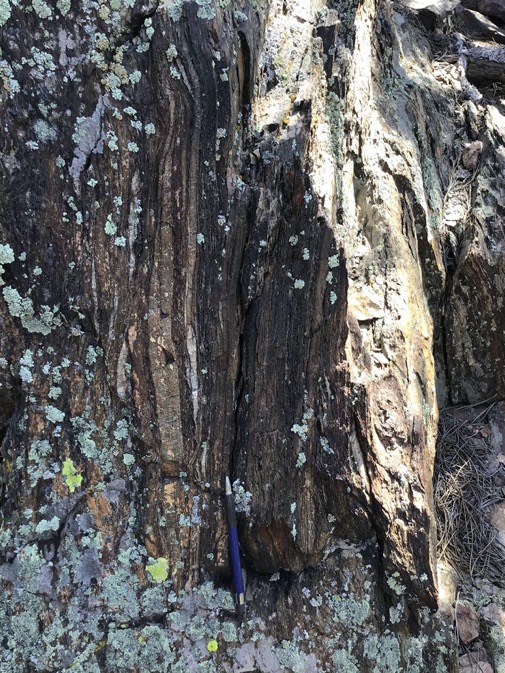


**Photo 2.** Right. A close view of the lower right side of the same outcrop as in Photo 1, with discontinuous lenses of white quartz veins highlighted with orange arrows. Pencil for scale.
