# Supplementary material for: Virtual mapping and analytical data integration: A teaching module using Precambrian crystalline basement in Colorado's Front Range (USA)
Source: Copernicus journal article supplement (doi:10.5194/gc-2021-9), 2021-05-05
Supplement: Supplementary file 97 [file GG87.docx]

**GG87**

**Lithology:** Quartzite.

**General structure:** Quartzite with cm- to dm-scale layers of grayish white massive quartzite separated by 1-2 cm thick layers of micaceous quartzite. The layers could be interpreted as relict bedding but the thin micaceous layers have a penetrative cleavage that is nearly parallel to the larger scale alternating layers, suggesting a tectonic foliation parallel to the relict bedding.

**Measurements:** Bedding (and penetrative cleavage) strike, dip is 055,55.
