# Supplementary material for: Virtual mapping and analytical data integration: A teaching module using Precambrian crystalline basement in Colorado's Front Range (USA)
Source: Copernicus journal article supplement (doi:10.5194/gc-2021-9), 2021-05-05
Supplement: Supplementary file 98 [file GG88.docx]

**GG88**

**Lithology:** Bt-granodiorite.

**General structure:** The granodiorite is strongly foliated (mylonitic) here with a well-developed stretching lineation defined by smeared feldspar.

**Measurements:** The foliation strike,dip is 250,79 and the lineation plunge -> trend is 60 -> 267.
