# Supplementary material for: Virtual mapping and analytical data integration: A teaching module using Precambrian crystalline basement in Colorado's Front Range (USA)
Source: Copernicus journal article supplement (doi:10.5194/gc-2021-9), 2021-05-05
Supplement: Supplementary file 99 [file GG89.docx]

**GG89**

**Lithology:** Schist.

**General structure:** Outcrop on the Burro Trail. The compositional layers in the schist appear to be relict bedding, but the parallel schistosity in the mica-rich layers is penetrative and so likely a tectonic foliation. This is supported by the identification of a small isoclinally folded quartzite layer with an axial surface parallel to the dominant schistosity. This generation of folding must pre-date a second generation of upright to inclined folds that are also common in the outcrop. Overall, the bedding/schistosity has a generally shallow NW dip.

**Measurements:** The orientation of the bedding/schistosity at the scale of the outcrop is approximated by an enveloping surface (across the upright folds) that has strike,dip 237,27. The axial surface of one of the upright folds has a strike,dip of 078,60 and a hinge with a plunge -> trend of 07 -> 080.


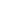


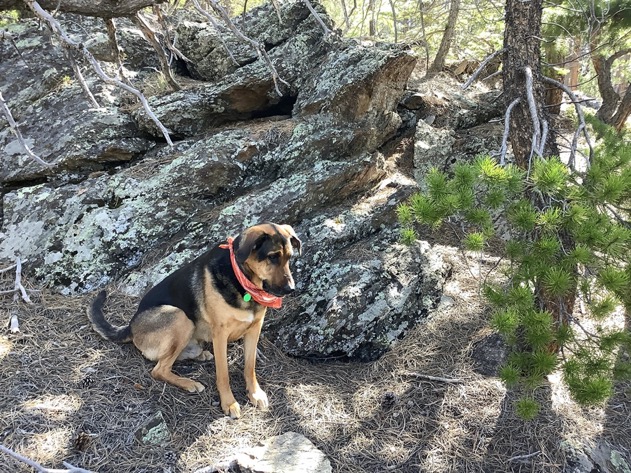
**Photo 1.** Left. This view is looking Northeast.

**Photo 2 and sketch.** Below. A close view and sketch of an isoclinal fold of thin (~1 cm thick) quartzite layer with the schistosity as its axial surface. Pencil tip is near a fold nose.


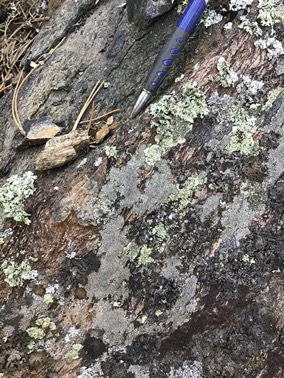


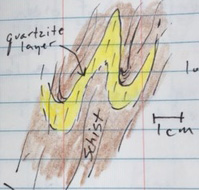

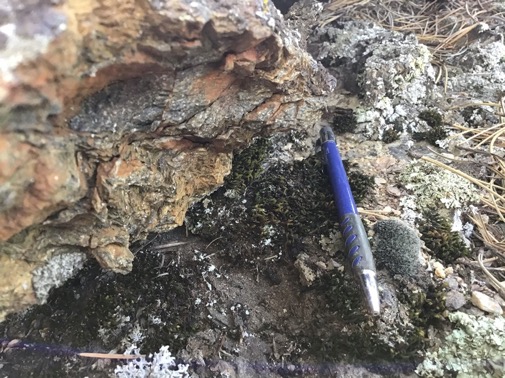
**Photo 3.** Right. A close view of cm-scale inclined folds of the schistosity. View is looking downplunge towards NE.
