# Supplementary material for: Virtual mapping and analytical data integration: A teaching module using Precambrian crystalline basement in Colorado's Front Range (USA)
Source: Copernicus journal article supplement (doi:10.5194/gc-2021-9), 2021-05-05
Supplement: Supplementary file 100 [file GG9.docx]

**GG9**

**Lithology:** Quartzite.

**General structure:** This outcrop is a light gray quartzite with cm-scale layers of slightly lighter and darker shades that could be interpreted to represent bedding. Local quartz-pebble conglomeratic horizons are common and also abundant in float (see photo). Some layers of quartzite show the traces of a weak steeply dipping foliation defined by wispy alternating layers of slightly different colored quartz.

**Measurements:** The bedding strike, dip is 012,36. The steeper foliation strike, dip is 49,75.


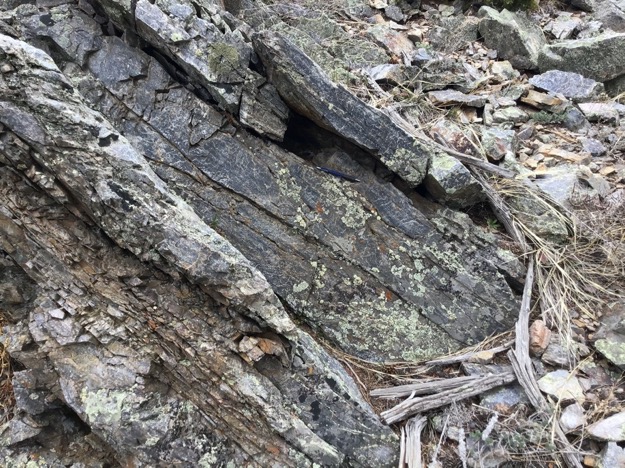


**Photo 1.** Outcrop view looking NE. Pencil in center of photo for scale.


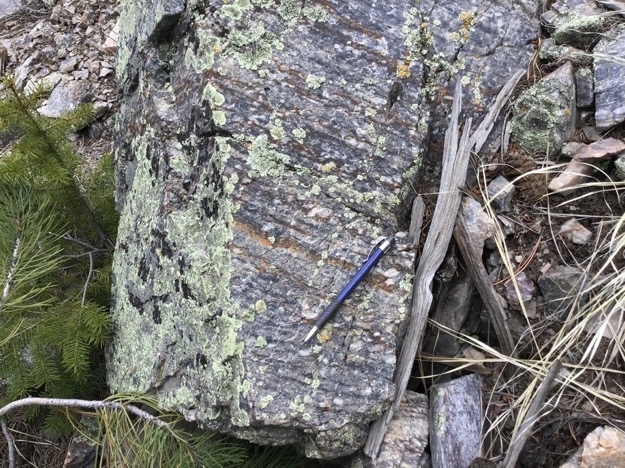


**Photo 2.** Float of quartz-pebble

conglomeratic quartzite.
