# Supplementary material for: Virtual mapping and analytical data integration: A teaching module using Precambrian crystalline basement in Colorado's Front Range (USA)
Source: Copernicus journal article supplement (doi:10.5194/gc-2021-9), 2021-05-05
Supplement: Supplementary file 101 [file GG90.docx]

**GG90**

**Lithology:** Schist.

**General structure:** Outcrop on the Burro Trail. The compositional layers in the schist appear to be relict bedding, but the parallel schistosity in the mica-rich layers is penetrative and so likely a tectonic foliation. The overall orientation of the bedding/schistosity appears to have a shallow dip but centimeter- to 10’s of centimeter-scale upright to inclined folds are common and give the schistosity locally steep dips.

**Measurements:** The enveloping surface of a series of tight folds has a strike,dip 290,28. The axial surface of a typical fold has a strike,dip of 228,74 and a hinge with a plunge -> trend of 26 -> 039.


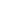


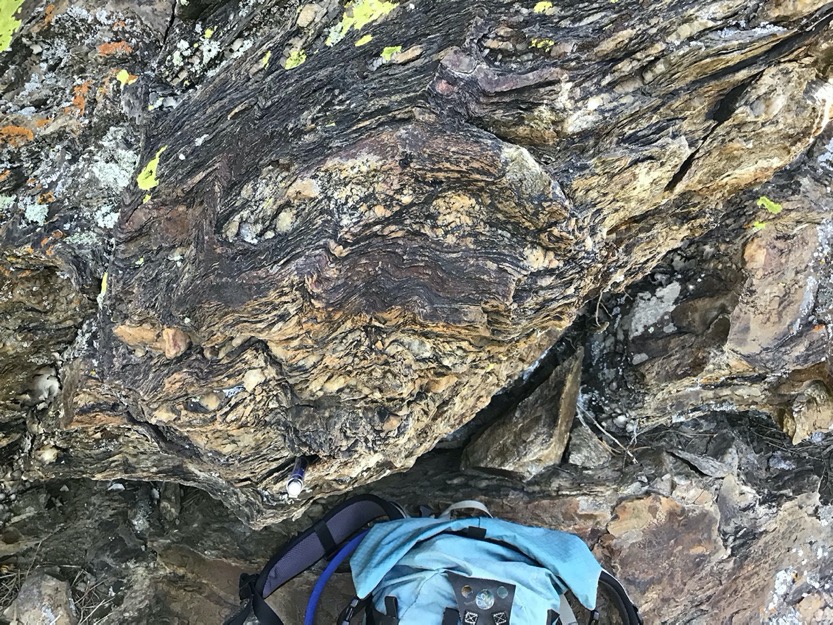


**Photo 1.** This view of the schist outcrop is looking Northeast, in approximately a fold profile view for the common upright to inclined folds.
