# Supplementary material for: Virtual mapping and analytical data integration: A teaching module using Precambrian crystalline basement in Colorado's Front Range (USA)
Source: Copernicus journal article supplement (doi:10.5194/gc-2021-9), 2021-05-05
Supplement: Supplementary file 102 [file GG91.docx]

**GG91**

**Lithology:** Schist, adjacent to quartzite.

**General structure:** Outcrop on the Burro Trail. This locality contains the **approximate contact** between schist on the SE and quartzite on the NW (photo). The compositional layers in the schist appear to be relict bedding, but the parallel schistosity in the mica-rich layers is penetrative and so likely a tectonic foliation. The overall orientation of the layering in the schist goes from shallowly dipping on the SE to very steeply dipping where in contact with quartzite. This transition occurs over a distance of about 20 meters. The layering in the quartzite is also steep, and the contact is concordant with internal layering in both units. Where the schist is steeply dipping, it contains numerous near isoclinal folds of thin quartzite layers and qtz veins. A stretching and mineral lineation is also present on the steep schistosity surfaces defined by smeared quartz and feldspar, and mica flakes, respectively.

**Measurements:** A representative measure of the steep bedding/schistosity has a strike,dip 054,80. The lineation has a plunge -> trend of 42 -> 230.


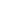


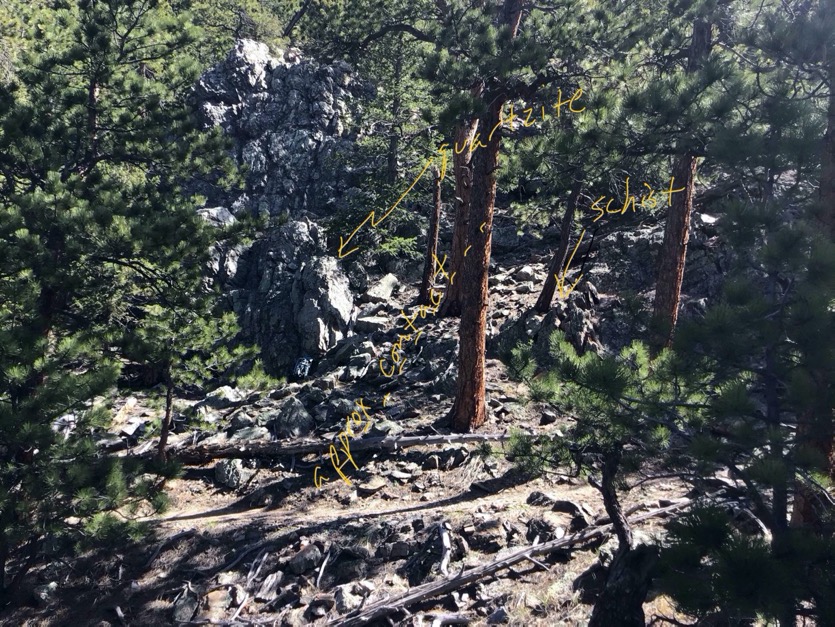


**Photo 1.** This view is looking Northeast, with the approximate contact indicated on the photo.
