# Supplementary material for: Virtual mapping and analytical data integration: A teaching module using Precambrian crystalline basement in Colorado's Front Range (USA)
Source: Copernicus journal article supplement (doi:10.5194/gc-2021-9), 2021-05-05
Supplement: Supplementary file 103 [file GG92.docx]

**GG92**

**Lithology:** Quartzite, adjacent to schist.

**General structure:** This outcrop is about 50 meters below (SW) the Burro Trail. It is quartzite, with cm- to dm-scale layers of grayish white massive quartzite separated by 1-2 cm thick layers of micaceous quartzite. The layers could be interpreted as relict bedding but the thin micaceous layers have a penetrative cleavage that is nearly parallel to the larger scale alternating layers, suggesting a tectonic foliation parallel to the relict bedding. An outcrop about 2 meters away to the SE is schist with a similarly oriented foliation, indicating a **possibly mappable contact** between the two lithologies.

**Measurements:** The bedding/foliation in the quartzite has strike, dip is 048,49.
