# Supplementary material for: Virtual mapping and analytical data integration: A teaching module using Precambrian crystalline basement in Colorado's Front Range (USA)
Source: Copernicus journal article supplement (doi:10.5194/gc-2021-9), 2021-05-05
Supplement: Supplementary file 104 [file GG93.docx]

**GG93**

**Lithology:** Schist

**General structure:** The compositional layers in this Bt-Ms schist appear to be relict bedding, but the parallel schistosity in the mica-rich layers is penetrative and so likely a tectonic foliation. Centimeter-scale open to close and upright to moderately inclined folds of the bedding/schistosity are common.

**Measurements:** The bedding/schistosity has typical strike,dip 040,51.


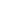


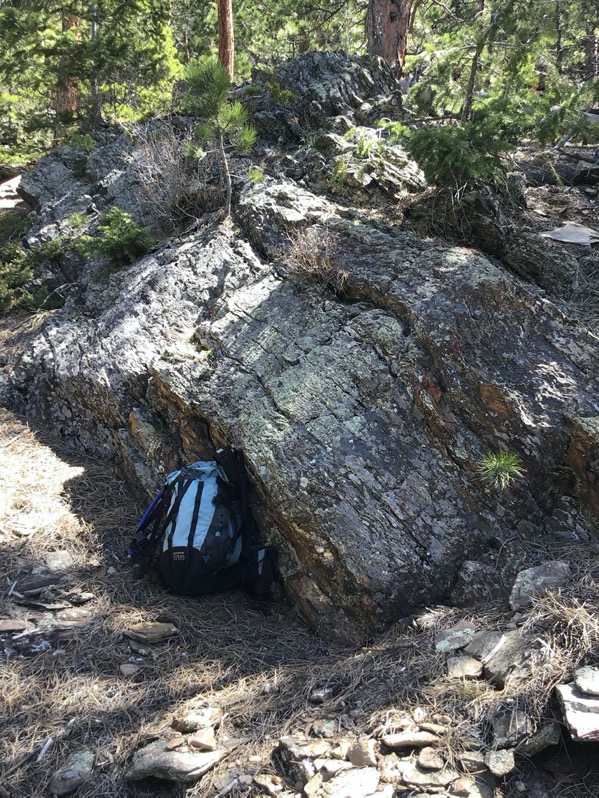


**Photo 1.** This view is looking Northeast.
