# Supplementary material for: Virtual mapping and analytical data integration: A teaching module using Precambrian crystalline basement in Colorado's Front Range (USA)
Source: Copernicus journal article supplement (doi:10.5194/gc-2021-9), 2021-05-05
Supplement: Supplementary file 105 [file GG94.docx]

**GG94**

**Lithology:** Schist.

**General structure:** This Bt-Ms-schist has thin cm-scale quartzite layers within it, suggesting a relict bedding now transposed into a foliation.

**Measurements:** The bedding/foliation in the schist has strike, dip is 062,38.


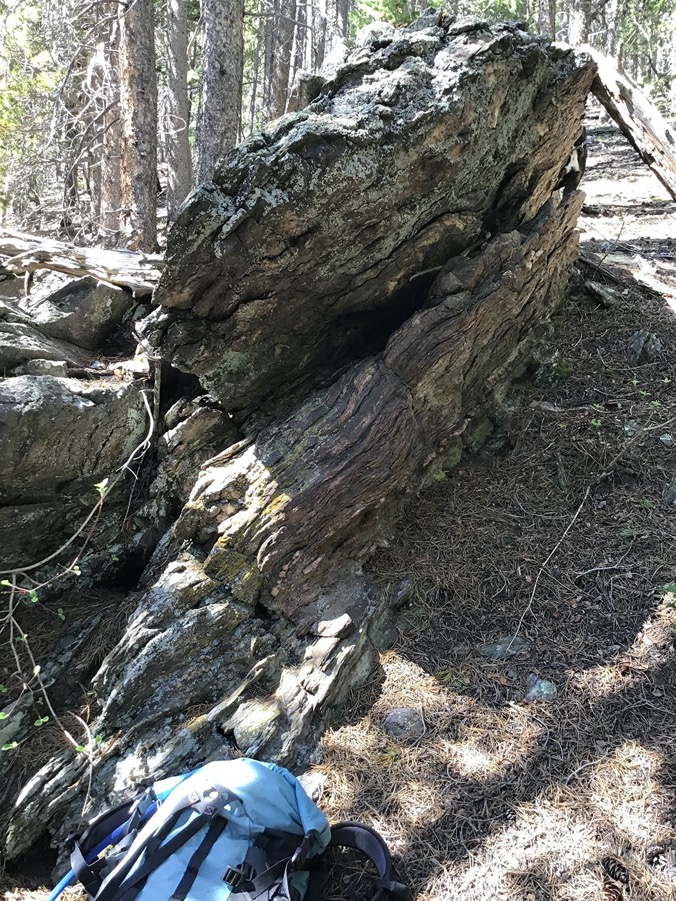


**Photo 1.** Outcrop of schist. Looking Southwest.
