# Supplementary material for: Virtual mapping and analytical data integration: A teaching module using Precambrian crystalline basement in Colorado's Front Range (USA)
Source: Copernicus journal article supplement (doi:10.5194/gc-2021-9), 2021-05-05
Supplement: Supplementary file 108 [file GG97.docx]

**GG97**

**Lithology:** Bt-granodiorite, adjacent to quartzite.

**General structure:** This outcrop displays strongly foliated (mylonitic) granodiorite with a well-developed stretching lineation defined by smeared quartz and feldspar. An outcrop about 2 meters away to the NW is quartzite with a similarly oriented foliation, indicating a **contact** between the two lithologies. The quartzite is also strongly mylonitized with a well-developed stretching lineation defined by smeared quartz and alignment of white mica (so also a mineral lineation).

**Measurements:** Mylonitic foliation in the quartzite has strike, dip is 253,72.
