# Supplementary material for: Virtual mapping and analytical data integration: A teaching module using Precambrian crystalline basement in Colorado's Front Range (USA)
Source: Copernicus journal article supplement (doi:10.5194/gc-2021-9), 2021-05-05
Supplement: Supplementary file 109 [file GG98.docx]

**GG98**

**Lithology:** Muscovite-bearing pegmatitic granite.

**General structure:** This granite outcrop has a moderately developed foliation.

**Measurements:** The bedding/foliation has typical strike,dip 064,67.


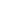


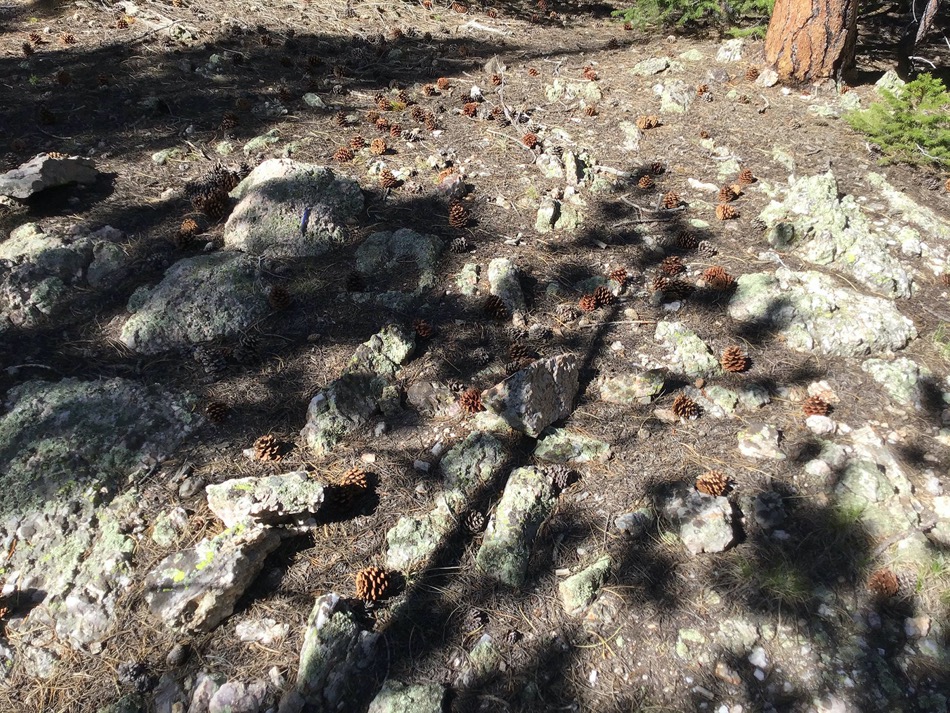


**Photo 1.** Scattered exposure of foliated pegmatite granite. The pencil on an outcrop near the top left is aligned parallel to the trace of foliation. Southwest is towards the top of the photo.
