# Supplementary material for: Virtual mapping and analytical data integration: A teaching module using Precambrian crystalline basement in Colorado's Front Range (USA)
Source: Copernicus journal article supplement (doi:10.5194/gc-2021-9), 2021-05-05
Supplement: Supplementary file 122 [file GoldenGatefielddata.xlsx]

## Sheet: stations
simplified station # for online mapping	UTM Northing (NAD27)	UTM Easting (NAD27)	lat	long	Lithology	General structure	Measurements	Foliation_strike_RHR	Foliation_dip	Gen_of_foliation	lineation_trend	lineation_plunge	Gen_of_lineation	Foliation2_strike_RHR	Foliation2_dip	Gen_of_foliation2	lineation2_trend	lineation2 plunge	Gen_of_lineation2	Foliation3_strike_RHR	Foliation3_dip	Type_of_foliation3	lineation3 trend	Lineation3_plunge	Type_of_lineation3	Fold_ax_plane_strike	Fold_ax_plane_dip	Fold_hinge_trend	Fold_hinge_plunge	Fold_type_generation	Enveloping_surface_strike_RHR	Enveloping_surface_dip	Type_env_surface	Shear_sense	Sketch?	Photos?
GG1	4411349	468389			Bt-granodiorite.	The granodiorite is protomylonitic here with a well-developed stretching lineation defined by smeared quartz and feldspar. On the near horizontal outcrop surface, a 2 cm-wide pegmatite vein is asymetrically pulled apart (boudinage) indicating left-lateral (sinistral) sense of displacement. If you assume that displacement was parallel to the stretching lineation, then that would also require a rev…	Mylonitic foliation strike, dip is 059,64. The stretching lineation plunge -> trend is 58 -> 209.													59	64	Sm	209	58	Lm									SE-side up, CL-5	yes	yes
GG2	4411536	467863			Quartzite	Light gray quartzite with strongly developed penetrative foliation - mylonitic. A prominent penetrative foliation is the most obvious structure, and a strong lineation is defined by alignment of white mica flakes and streaks of slightly different shaded quartz. A small shear band provides evidence for high confidence (5 on scale of 1-5) NE-side-up shear sense (Photo 3).	Mylonitic foliation strike, dip is 250,67. The stretching lineation plunge -> trend is 66 -> 285.													250	67	Sm	285	66	Lm									NW-side-up, CL-5	yes	yes
GG3	4411565	467860			Schist, adjacent to quartzite.	Garnet-andalusite-biotite-muscovite schist with interlayered quartzite. This outcrop is schist with small (up to 0.5 mm) garnet porphyroblasts and up to 1 cm sized gray porphyro¬blasts that are suspected andalusite. 1-5 cm thick layers of dark gray quartzite are abundant. The alternating layers of schist and quartzite can be interpreted as relict bedding but the parallel schistosity is likely a t…	Shallower dipping layers strike,dip 273,29. On this same surface, a min¬eral lineation defined by white mica flakes is also visible on the surfaces of thin quartzite layers and has a plunge -> trend of 29->355. Steeper dipping beds strike,dip 249,52. In the portion of the outcrop where bedding/schistosity dip shallowly, an open fold axial surface has strike,dip 61,72 and a hinge plunge->trend of …	273	29	S0/S1	355	29	L1													61	72	66	10	F2						yes
								249	52	S0/S1																246	63	65	17	F2
GG4	4411420	467937			Bt-granodiorite.	The granodiorite is strongly mylonitic here, with cm-scale zones of ultramylonite, with a well-developed stretching lineation defined by smeared quartz and feldspar. On steep faces perpendicular to the foliation and close to parallel to the lineation, a few asymmetric feldspar porphyroclasts suggest NW-side-up (normal sense) motion. This shear sense is not very clear and so is assigned a relative…	Mylonitic foliation strike, dip is 063,84. The stretching lineation plunge -> trend is 63 -> 231.													63	84	Sm	231	63	Lm											yes
GG5	4411537	467768	39.8551	-105.377	Quartzite	This outcrop, just above the trail, is a light gray quartzite with cm-scale layers of slightly lighter and darker shades interpreted to represent bedding. A faint planar structure that is oblique to the bedding is a penetrative foliation. A mineral lineation on this surface is defined by white mica and a rare biotite flakes.	The bedding strike, dip is 266,34. The cleavage strike, dip is 235,80. The mineral lineation has plunge -> trend of 39->243.	266	34	S0/S1				235	80	S2	243	39	L2																yes	yes
GG6	4411670	467927			Quartzite, adjacent to schist.	This outcrop contains quartzite on the NW side with a relatively abrupt transition (contact) to Grt-bearing Ms-Bt schist on SE side, and thus a possible mappable contact. The quartzite has cm- to dm-scale layers of grayish white massive quartzite separated by 1-2 cm thick layers of micaceous quartzite. Similarly, the dominant layering in schist is both a compositional banding (schist with thin qu…	Bedding (and penetrative foliation) in the quartzite has strike, dip is 060,86. Transposed bedding and penetrative foliation in the schist has strike, dip is 048,89.	60	86	S0/S1																									yes	yes
								48	89	S0/S1
GG7	4411947	467102			Muscovite-bearing pegmatitic granite.	This granite outcrop has a moderately developed foliation.	The bedding/foliation has typical strike,dip 063,44.							63	44	S2																				no
GG8	4411715	467511			Bt-granodiorite	This medium grained Bt-granodiorite has a weak foliation defined by feldspar phenocrysts and biotite. It may be a magmatic foliation.	The foliation has a strike,dip 006,21.							6	21	magmatic?																				no
GG9	4411566	467647			Quartzite	This outcrop is a light gray quartzite with cm-scale layers of slightly lighter and darker shades that could be interpreted to represent bedding. Local quartz-pebble conglomeratic horizons are common and also abundant in float (see photo). Some layers of quartzite show the traces of a weak steeply dipping foliation defined by wispy alternating layers of slightly differently colored quartz.	The bedding strike, dip is 012,36. The steeper foliation strike, dip is 49,75.	12	36	S0/S1				49	75	S2																				yes
GG10	4411481	467701			quartzite	Light gray quartzite with strongly developed penetrative foliation - mylonitic. A prominent penetrative foliation is the most obvious structure, and a strong lineation is defined by align­ment of white mica flakes and streaks of slightly different shaded quartz.	The mylonitic foliation strike, dip is 222,76. The lineation plunge -> trend is 74 -> 260.													222	76	Sm	260	74	Lm											no
GG11	4411490	467630			Bt-granodiorite	This outcrop of granodiorite a moderately developed foliation defined by biotite alignment. The foliation is not mylonitic in that there are not abundant tails of recrystallized material around phenocrysts. There is a weak mica alignment on the foliation surface defining a mineral lineation.	The foliation strike, dip is 054,81. The lineation has a plunge -> trend of 64 -> 225.							54	81	S2	225	64	L2																	no
GG12	4411643	467666			Quartzite.	This light gray quartzite has a prominent layering defined by cm-scale bands of slightly lighter and darker shades of white, gray, and bluish gray that could be interpreted to represent bedding. Some layers show the trace of a steeply dipping penetrative foliation defined by white mica flakes and wispy alternating layers of slightly variably colored quartz (photo). Local quartz-pebble conglomerat…	The bedding strike, dip is 055,55. The steeper foliation strike, dip is 55,80.	55	55	S0/S1				55	80	S2																				yes
GG13	4411825	467706			Bt-granodiorite	This outcrop of granodiorite a moderately developed foliation defined by biotite alignment. The foliation is not mylonitic in that there are not abundant tails of recrystallized material around phenocrysts.	The foliation strike, dip is 047,65.							47	65	S2																				no
GG14	4411909	467786			Quartzite.	This quartzite has a prominent layering defined by cm-scale bands of slightly lighter and darker shades of white, gray, and bluish gray that could be interpreted to represent bedding. But there are also aligned mica flakes parallel to the layering suggesting that it may also be a tectonic foliation. Some outcrops also display local horizons of quartz-pebble conglomeratic horizons that are as thic…	The layering/bedding has strike,dip of 049,40.	49	40	S0/S1																										yes
GG15	4411963	467854			Quartzite.	This quartzite has a prominant layering defined by cm-scale bands of slightly lighter and darker shades of white, gray, and bluish gray that could be interpreted to represent bedding. But there are also aligned mica flakes parallel to the layering suggesting that it may also be a tectonic foliation. Local quartz-pebble conglomeratic horizons are common and also abundant in float.	The bedding has a strike, dip of 055,63.	55	63	S0/S1																										yes
GG16	4411972	467977			Quartzite.	This quartzite has a prominant layering defined by cm-scale bands of slightly lighter and darker shades of white, gray, and bluish gray that could be interpreted to represent bedding. But there are also aligned mica flakes parallel to the layering suggesting that it may also be a tectonic foliation.	The bedding has a strike, dip of 035,45.	35	45	S0/S1																										no
GG17	4411872	468014			Schist	The compositional layers in this Bt-Ms schist appear to be relict bedding, but the parallel schistosity in the mica-rich layers is penetrative and so likely a tectonic foliation.	The bedding/schistosity has typical strike,dip 055,78.	55	78	S0/S1																										no
GG18	4411789	467942			Quartzite.	This quartzite has a layering defined by cm-scale bands of slightly lighter and darker shades of white, gray, and bluish gray that could be interpreted to represent bedding.	The layering/bedding has strike,dip of 041,60.	41	60	S0/S1																										yes
GG19	4411701	467937			Quartzite.	This quartzite has a prominent layering defined by cm-scale bands of slightly lighter and darker shades of white and gray, and by 1-2 cm thick layers with slightly more mica.	The layering has strike,dip of 219,89.	219	89	S0/S1																										no
GG20	4411608	467971			Schist.	This Garnet-andalusite-biotite-muscovite schist has abundant 1-5 cm thick layers of light gray to brown quartzite. The alternating layers of schist and quartzite appear to be relict bedding, but the parallel schistosity in the mica-rich layers is penetrative and so likely a tectonic foliation. A mineral lineation is visible on the foliation surface, defined by muscovite and biotite alignment. Cen…	The bedding/schistosity strike,dip 254,47. The mineral lineation plunge -> trend is 63 -> 342. The axial surface of one of the folds has a strike,dip of 228,84.	254	47	S0/S1	342	47	L1 mica min													228	84			F2						no
GG21	4411505	468335			Bt-granodiorite.	The granodiorite is strongly mylonitic here, with a well-developed stretching lineation defined by smeared quartz and feldspar. On steep faces perpendicular to the foliation and close to parallel to the lineation, a few asymmetric feldspar porphyroclasts indicate SE-side-up motion. This shear sense is clear and so is assigned a relatively high confidence (5 on a scale of 1 to 5).	Mylonitic foliation strike, dip is 058,78. The stretching lineation plunge -> trend is 54 -> 218.													58	78	Sm	218	54	Lm									SE-side-up, CL-5		no
GG22	4411606	468301			Bt-granodiorite.	The granodiorite is strongly mylonitic here, with a well-developed stretching lineation defined by smeared quartz and feldspar. On steep faces perpendicular to the foliation and close to parallel to the lineation, a few asymmetric feldspar porphyroclasts indicate SE-side-up motion. This shear sense is clear and so is assigned a relatively high confidence (4 on a scale of 1 to 5).	Mylonitic foliation strike, dip is 060,88. The stretching lineation plunge -> trend is 59 -> 220.													60	88	Sm	220	59	Lm									SE-side-up, CL-4		yes
GG23	4411718	468336			Bt-granodiorite.	The granodiorite is strongly mylonitic here, with a steep NE-SW striking foliation.	The mylonitic foliation has strike,dip of 245,89 and the stretching lineation has plunge -> trend of 70 -> 248.													245	89	Sm	248	70	Lm											yes
GG24	4411729	468270			Quartzite.	This quartzite has a mylonitic penetrative foliation and stretching lineation defined by alignment of white mica and streaks of different shaded quartz. Another prominent feature is a m-scale tight Z-fold (viewed down plunge) with a hinge that plunges shallowly northeast. Since the hinge plunges at a high angle to the stretching lineation, the asymmetry of the fold can be a high confidence (CL 5 …	Mylonitic foliation strike, dip is 065,85. The lineation plunge -> trend is 79 -> 209. An independent measure of the axial surface of the m-scale fold is strike,dip 070,72 with a hinge plunge -> trend 30 -> 055.													65	85	Sm	209	79	Lm	70	72	55	30	Fm				NW-side-up, CL-5	yes	yes
GG25	4411775	468230			Schist.	The schist, which locally contains garnet, has abundant 1-5 cm thick layers of light gray to brown quartzite that appear to be relict bedding, but the parallel schistosity in the mica-rich layers is penetrative and so likely a tectonic foliation. A visible mineral lineation is defined by needle-like black crystals that may be tourmaline.	The bedding/schistosity has strike,dip of 250,74. The mineral lineation has a plunge -> trend of 45 -> 035.	250	74	S0/S1	35	45	L1 min																							no
GG26	4411895	468247			Quartzite, adjacent to schist.	Cm- to dm-scale layers of grayish white massive quartzite are separated by small 1-2 cm thick layers of a slightly more micaceous quartzite. The layers appear to be relict bedding but the micaceous layers appear to have a penetrative foliation that is in most places nearly parallel to the layering and that could be tectonic. A visible mineral lineation on the layering surface is defined by aligne…	The bedding/folation has strike,dip of 075,47. The mineral lineation has a plunge -> trend of 39 -> 217. The axial surface of a cm-scale fold has strike,dip of 260,67 and a hinge with a plunge -> trend of 14 -> 075.	75	47	S0/S1	217	39	L1 min													260	67	75	14	F2						yes
GG27	4412000	468191			Quartzite.	Cm- to dm-scale layers of grayish white massive quartzite are separated by small 1-2 cm thick layers of a slightly more micaceous quartzite. The layers appear to be relict bedding but the micaceous layers appear to have a penetrative foliation that is in most places nearly parallel to the layering and that could be tectonic.	The bedding/folation has strike,dip of 071,66.	71	66	S0/S1																										no
GG28	4412055	468187			Bt-granodiorite float, adjacent to quartzite float	There is no convincing outcrop here, but abundant float of granodiorite only in an area to the NW and of quartzite only just a few meters to the SE suggests there may be an approximately mappable contact here.	No measurements here.																													yes
GG29	4412100	468177			Bt-granodiorite	This outcrop of granodiorite a moderately developed foliation defined by biotite alignment. The foliation is not mylonitic in that there are not abundant tails of recrystallized material around phenocrysts.	The foliation strike, dip is 030,75.							30	75	S2																				no
GG30	4412147	468250			Quartzite.	This quartzite has a prominant layering defined by cm-scale bands of slightly lighter and darker shades of white and gray, and by 1-2 cm thick layers with slightly more mica. The layering could be interpreted to represent bedding, but a mineral lineation on the surface of the more micaceous layers defined by a white mica suggests that the layering is probably also a tectonic fabric. Some layers s…	The bedding/layering strike, dip is 055,53. The mineral lineation on the bedding/layering surface has a plunge -> trend of 40 -> 198. The steeper 2nd foliation strike, dip is 48,63.	55	53	S0/S1	198	40	L1 min	48	63	S2																				no
GG31	4412126	468344			Schist	This outcrop is Grt-Ms-Bt schist with abundant 1-5 cm thick layers of light gray to brown quartzite. The alternating layers of schist and quartzite appear to be relict bedding, but the parallel schistosity in the mica-rich layers is penetrative and so likely a tectonic foliation. A mineral lineation is visible on the foliation surface, defined by muscovite and biotite alignment. Centimeter-scale …	The bedding/schistosity has strike, dip is 049,27. The plunge -> trend of a cm-scale fold of the schistosity is 42 -> 092.	49	27	S0/S1																		92	42	F2						yes
GG32	4412025	468395			Schist	This outcrop is Ms-Bt schist with abundant 1-5 cm thick layers of light gray to brown quartzite. The alternating layers of schist and quartzite appear to be relict bedding, but the parallel schistosity in the mica-rich layers is penetrative and so likely a tectonic foliation. Centimeter-scale upright and shallowly plunging folds of the bedding/schistosity are common.	The bedding/foliation strike, dip is 012,31. A measurement of an upright fold hinge has plunge -> trend of 30 -> 073.	12	31	S0/S1																		73	30	F2						no
GG33	4411812	468465			Bt-granodiorite adjacent to quartzite.	This outcrop, just off of the Burro Trail near a saddle on a ridge, displays a contact between strongly foliated (mylonitic) granodiorite on the SE and strongly foliated (mylonitic) quartzite on the NW. The mylonitic foliation in the granodiorite has a well-developed stretching lineation defined by smeared quartz and feldspar. Local cm-scale veins of coarse-grained pink granite pegmatite are also…	Mylonitic foliation in the granodiorite has strike, dip is 061,89. The stretching lineation plunge -> trend is 61 -> 241. Mylonitic foliation in the quartzite has strike, dip is 245,89. The stretching lineation plunge -> trend is 75 -> 266.													245	89	Sm	266	75	Lm									SE-side. CL-5		yes
																				61	89	Sm	241	61	Lm
GG34	4411523	467746			Quartzite	A prominent penetrative mylonitic foliation is the most obvious structure in this light gray quartzite, and a strong lineation is defined by align¬ment of white mica flakes and streaks of slightly variably shaded quartz.	The mylonitic foliation strike, dip is 239,89. The lineation plunge -> trend is 67 -> 230.													239	89	Sm	230	67	Lm											no
GG35	4411458	467724			Bt-granodiorite.	The granodiorite is strongly foliated and mylonitic here. It has a well-developed stretching lineation defined by smeared feldspar and biotite alignment.	The mylonitic foliation strike,dip is 064,84.													64	84	Sm														no
GG36	4411514	467679			Quartzite.	A northwest-southeast trending band of low quartzite cliffs occurs here, and it displays a transition over about a 10 meter distance from strongly foliated quartzite on the southeast end of the band to very weakly foliated quartzite on the northwest end. At the southeast end, a prominent steeply dipping penetrative mylonitic foliation is the most obvious structure, and a strong lineation is defin…	Mylonitic foliation in the quartzite at the southeast end of the low cliff band has strike, dip 237,77. The stretching lineation plunge -> trend is 70 -> 323.													237	77	Sm	323	70	Lm											yes
GG37	4411552	467650			Light gray quartzite.	This quartzite has a prominant layering defined by cm-scale bands of slightly lighter and darker shades of white, gray, and bluish gray that could be interpreted to represent bedding. Some layers show the trace of a steeply dipping penetrative foliation defined by white mica flakes and wispy alternating layers of slightly different colored quartz.	The bedding strike, dip is 024,44. The steeper foliation strike, dip is 59,86.	24	44	S0/S1				59	86	S2																				no
GG38	4411561	467600			Bt-granodiorite	This outcrop of granodiorite has a magmatic foliation most prominently defined by aligned blocky feldspar crystals that appears to dipping shallowly. Locally superimposed on that magmatic foliation are 10’s of cm scale domains of steeply dipping foliation defined by biotite alignment. The foliation is weakly tto moderately developed, but not mylonitic in that there are not abundant tails of recry…	The foliation strike, dip is 060,75.							60	75	S2																				yes
GG39	4411621	467661			Quartzite.	This quartzite has a prominent layering defined by cm-scale bands of slightly lighter and darker shades of white, gray, and bluish gray that could be interpreted to represent bedding. Some layers show the trace of a steeply dipping penetrative foliation defined by white mica flakes and wispy alternating layers of slightly different colored quartz.	The bedding strike, dip is 017,46. The steeper foliation strike, dip is 59,60.	17	46	S0/S1				59	60	S2																				yes
GG40	4411777	467610			Bt-granodiorite	This outcrop of granodiorite a moderately developed foliation defined by biotite alignment. The foliation is not mylonitic in that there are not abundant tails of recrystallized material around phenocrysts.	The foliation strike, dip is 034,49.							34	49	S2																				no
GG41	4411777	467690			Quartzite.	This quartzite has a prominant layering defined by cm-scale bands of slightly lighter and darker shades of white, gray, and bluish gray that could be interpreted to represent bedding. Some layers show the trace of a steeply dipping penetrative foliation defined by white mica flakes and wispy alternating layers of slightly differently colored quartz.	The bedding strike, dip is 009,18. The steeper foliation strike,dip is 040,81.	9	18	S0/S1				40	81	S2																				no
GG42	4411768	467842			Schist	This outcrop is garnet-biotite-muscovite schist has abundant 1-5 cm thick layers of light gray to brown quartzite. The alternating layers of schist and quartzite appear to be relict bedding, but the parallel schistosity in the mica-rich layers is penetrative and so likely a tectonic foliation. A mineral lineation is visible on the foliation surface, defined by muscovite alignment and Fe-stained s…	The bedding/schistosity strike,dip 044,68. The mineral lineation plunge -> trend is 44 -> 220.	44	68	S0/S1	220	44	L1 (min)																							yes
GG43	4411719	467834			Schist	This outcrop is schist with abundant 1-5 cm thick layers of light gray to brown quartzite. The alternating layers of schist and quartzite appear to be relict bedding, but the parallel schistosity in the mica-rich layers is penetrative and so likely a tectonic foliation. Cm-scale inclined and shallowly plunging folds of the schistosity are also common, and there is a locally developed 2nd penetrat…	The bedding/schistosity strike, dip is 039,82. The oblique 2nd foliation strike,dip is 256,69. The axial surface of one of the cm-scale folds has a strike, dip of 246,69 and a hinge with a plunge -> trend of 28 -> 067.	39	82	S0/S1				256	69	S2										246	69	67	28	F2						no
GG44	4411684	467771			Schist, adjacent to quartzite	There is no in place outcrop (so no measurements) at this locality, but the dominance of float lithology changes abruptly over a several meter distance, suggesting a potentially mappable contact between schist to the SE and quartzite to the NW to within about 10 meters.	No measurement made here.																													no
GG45	4411567	467816			Quartzite.	Cm- to dm-scale layers of grayish white massive quartzite are seperated by small 1-2 cm thick layers of a more micaceous quartzite. These thin layers have a penetrative cleavage that appears mostly parallel to the larger scale alternating layers. The layers are interpreted as relict bedding but the penetrative cleavage suggests there may be a tectonic foliation that is here parallel to the beddin…	Bedding (and penetrative cleavage) strike, dip is 251,33.	251	33	S0/S1																										yes
GG46	4411598	467924			Schist	This outcrop is Garnet-andalusite-biotite-muscovite schist with abundant 1-5 cm thick layers of light gray to brown quartzite. The alternating layers of schist and quartzite appear to be relict bedding, but the parallel schistosity in the mica-rich layers is penetrative and so likely a tectonic foliation. Centimeter-scale moderately inclined folds of the bedding/schistosity are common and a secon…	The bedding/schistosity strike,dip 264,51. The axial surface foliation strike,dip is 064,62.	264	51	S0/S1				64	62	S2																				no
GG47	4411671	467997			Quartzite.	Cm- to dm-scale layers of grayish white massive quartzite seperated by small 1-2 cm thick layers of a more micaceous quartzite. The layers are interpreted as relict bedding. The layering has a wavy appearance that looks like open folding.	The layering has an approximate strike, dip of 332,31.	332	31	S0/S1																										yes
GG48	4411816	468025			Quartzite.	Cm- to dm-scale layers of grayish white massive quartzite separated by small 1-2 cm thick layers of a more micaceous quartzite. The layers could represent relict bedding, but the thin layers also have a penetrative cleavage that appears mostly parallel to the larger scale alternating layers. This suggests there may be a tectonic foliation that is here parallel to the bedding.	The bedding/schistosity strike,dip 063,53.	63	53	S0/S1																										no
GG49	4411917	467948			Schist, in contact with quartzite.	This Garnet-biotite-muscovite schist outcrop contains a likely mappable contact between schist to the SE and quartzite to the NW. The compositional layers in the schist appear to be relict bedding, but the parallel schistosity in the mica-rich layers is penetrative and so likely a tectonic foliation. Centimeter-scale upright folds of the bedding/schistosity are common.	The bedding/schistosity in the schist has strike,dip 056,76. The bedding/layering in the quartzite has strike,dip of 066,74. The axial surface of one of the upright folds has strike,dip is 070,85.	66	74	S0/S1																70	85			F2						no
								56	76	S0/S1
GG50	4412012	467921			Bt-granodiorite	This outcrop of granodiorite a moderately developed foliation defined by biotite alignment. The foliation is not mylonitic in that there are not abundant tails of recrystallized material around phenocrysts.	The foliation strike, dip is 054,72.							54	72	S2																				yes
GG51	4411866	468134			Quartzite.	Cm- to dm-scale layers of grayish white massive quartzite separated by small 1-2 cm thick layers of a more micaceous quartzite. The layers could represent relict bedding.	The bedding strike, dip is 055,62.	55	62	S0/S1																										no
GG52	4411804	468202			Bt-granodiorite	This outcrop of granodiorite, in a narrow ravine, is strongly foliated and has a moderately well-developed stretching lineation defined by streaks of feldspar, quartz, and biotite. The exposure is about 8 m-wide across the strike of the foliation.	The foliation strike, dip is 263,70. The lineation has plunge -> trend of 43 -> 071.							263	70	S2	71	43	L2																	yes
GG53	4411765	468194			Schist, in contact with quartzite.	This outcrop displays an abrupt transition from Garnet-andalusite-biotite-muscovite schist (with abundant 1-5 cm thick layers of light gray to brown quartzite) on the NW to quartzite on the SE, which is a possibly mappable contact. The compositional layers in the schist appear to be relict bedding, but the parallel schistosity in the mica-rich layers is penetrative and so likely a tectonic foliat…	One of the cm-scale folds in the schist has a hinge with plunge -> trend of 49 -> 070.																			70	49			F2						yes
GG54	4411752	468199			Schist, in contact with quartzite.	This schist abundant 1-30 cm thick layers of gray to brown quartzite. The compositional layers in the schist appear to be relict bedding, but the parallel schistosity in the mica-rich layers is penetrative and many of the quartzite layers are isoclinally folded (photo). So, even if the layering is relict bedding, it has clearly now been transposed into a strong tectonic foliation. Less than 10 me…	The strike,dip of the foliation is 251,67.	251	67	S0/S1																										yes
GG55	4411703	468219			Quartzite	Light gray quartzite with strongly developed penetrative foliation - mylonitic. A prominent penetrative foliation is the most obvious structure, and a strong lineation is defined by align­ment of white mica flakes and streaks of slightly different shaded quartz.	The mylonitic foliation strike, dip is 078,89. The lineation plunge -> trend is 67 -> 257.													78	89	Sm	257	67	Lm											no
GG56	4411660	468270			Bt-granodiorite.	The granodiorite is strongly mylonitic here, with a steep NE-SW striking foliation.	The mylonitic foliation has strike,dip of 068,88 and the stretching lineation has plunge -> trend of 72 -> 223.													68	88	Sm	223	72	Lm											yes
GG57	4411722	468371			Bt-granodiorite.	This outcrop is on the east side of a steep N-trending ravine and contains strongly foliated (mylonitic) granodiorite. Several high quality shear sense indicators are observed, including S-C composite fabrics, simple assymetric feldspar porphyroclasts with recrystallized tails (“sigma” clasts) and a fractured feldspar clast with a synthetic micro-fault (photos). All indicate SE-side up shear sens…	The mylonitic foliation has strike,dip of 060,85 and the stretching lineation has plunge -> trend of 74 -> 222.													60	85	Sm	222	74	Lm									SE-side up, CL-5	yes	yes
GG58	4411568	467732			Quartzite.	This outcrop is at the southeastern most end of the high quartzite cliffs above the Burro Trail. Cm- to dm-scale layers of grayish white massive quartzite are separated by small 1-2 cm thick layers of a slightly more micaceous quartzite. The layers appear to be relict bedding but the micaceous layers appear to have a penetrative foliation that is in most places nearly parallel to the layering and…	Several different measurements of the bedding were taken along the cliff face and their strikes, dips are (1) 281, 30, (2) 060,39, (3) 345,20, (4) 013,25, and (5) 035,51. Two more measures of bedding were made on opposite limbs of a cm-scale fold at the far right of the outcrop (Photo 4 and sketch) and they are (6) 22,54 and (7) 259,51. The second one [060,39] is probably a good approximation for…	281	30	S0/S1				55	73	S2												52	29	F2					yes	yes
								22	54	S0/S1				50	71	S2
								259	51	S0/S1
								60	39	S0/S1
								345	20	S0/S1
								13	25	S0/S1
								35	51	S0/S1
GG59	4411609	467851			Schist.	This outcrop is garnet-andalusite-biotite-muscovite schist with abundant 1-5 cm thick layers of light gray to brown quartzite. The alternating layers of schist and quartzite appear to be relict bedding. However, some of the quartzite layers are isoclinally folded and have axial surfaces that are parallel to the schistosity in adjacent mica-rich layers. This suggests that the prominent layering ev…	The bedding/schistosity strike,dip 345,37. A representative hinge of one of the upright folds has a plunge->trend of 15->060.	345	37	S0/S1																		60	15	F2						yes
GG60	4411396	469281			Bt-granodiorite.	The granodiorite is weakly foliated here with local cm-scale zones of more strongly foliated protomylonite. In the latter zones, a moderately developed stretching lineation is defined by smeared feldspar. Some asymmetric porphyroclasts of feldspar (sigma clasts) indicate SE-side-up sense of shear with good confidence (4 on a scale of 1 for highest and 5 for lowest).	The protomylonitic foliation strike,dip is 065,60 and the lineation plunge -> trend is 40 -> 220.													65	60	Sm	220	40	Lm									SE-side up ,CL-4		no
GG61	4411628	468960			Bt-granodiorite.	The granodiorite is moderatley foliated here with local cm-scale zones of more strongly foliated protomylonite. In the latter zones, a well-developed stretching lineation is defined by smeared feldspar. An earlier weak foliation that may be magmatic is asymmetrically deflected into the steeper mylonitic foliation, indicating SE-side-up sense of shear with moderate confidence (3 on a scale of 1 fo…	The protomylonitic foliation strike,dip is 037,79 and the lineation plunge -> trend is 60 -> 191.													37	79	Sm	191	60	Lm									SE-side-up, CL-3		no
GG62	4411826	468611			Bt-granodiorite	This outcrop, just off of the Burro Trail, displays strongly foliated (mylonitic) granodiorite with a well-developed stretching lineation defined by smeared quartz and feldspar. Several asymmetric porphyroclasts indicate SE-side-up sense of shear with fairly high confidence (confidence 4 on a scale of 1 to 5).	Mylonitic foliation in the granodiorite has strike, dip is 243,89. The stretching lineation plunge -> trend is 76 -> 270.													243	89	Sm	270	76	Lm									SE-side-up, CL-4		no
GG63	4412182	468235			Quartzite, adjacent to Bt-granodiorite	Light to dark gray quartzite with layers of variable color. Local quartz-pebble conglomeratic horizons are common, particularly at the northwesternmost outcrops (photo). The colored layers and transition to conglomeratic horizons suggest this is relict bedding, but the observation that many of the pebbles appear flattened (photo) the layering may also be a tectonic foliation. Some of the quartz p…	Bedding/foliation in the quartzite has strike, dip 069,46. The stretching lineation from pebbles has plunge -> trend of 28 -> 209.	69	46	S0/S1	209	28	L1 stretched pebbles																							yes
GG64	4411636	467859			Schist.	This Grt-And-Ms schist has abundant 1-5 cm thick layers of light gray to brown quartzite alternating with schist, which probably represents a relict bedding. But the parallel schistosity in the mica-rich layers is penetrative and so likely a tectonic foliation, meaning that the bedding has been transposed into the orientation of the penetrative schistosity. This is supported by the presence of a …	The bedding/schistosity has variable strike and dip due to the folding, but a representative measurement for the whole outcrop has strike, dip of 285,20. The stretching lineation has a plunge -> trend of 04 -> 020. The hinge of one of the cm-scale upright folds has a plunge -> trend of 28 -> 079.	285	20	S0/S1	20	4	L1 stretch in quartzite layer															79	28	F2						no
GG65	4411526	467633			Bt-granodiorite	This outcrop of granodiorite has a weakly developed foliation defined by biotite alignment.	The foliation strike, dip is 064,82.							64	82	S2																				no
GG66	4411580	467622			Bt-granodiorite	This outcrop of granodiorite has a weakly developed foliation defined by biotite alignment.	The foliation strike, dip is 060,72.							60	72	S2																				no
GG67	4411622	467744			Quartzite, adjacent to schist.	This quartzite has a prominant layering defined by cm-scale bands of slightly lighter and darker shades of white and gray, and by 1-2 cm thick layers with slightly more mica. The layering could be interpreted to represent bedding. Some layers show the trace of a more steeply dipping penetrative foliation that is oblique to the layering, defined by wispy alternating layers of slightly differently …	The bedding/layering strike, dip is 010,29. The steeper foliation that is oblique to the layering has strike, dip is 037,60.	10	29	S0/S1				37	60	S2																				no
GG68	4411684	467722			Quartzite	Light to bluish gray quartzite with layers of variable color. The colored layers suggest this is relict bedding, but streaks of quartz and mica on the layer surface suggest a tectonic stretching lineation.	Bedding/layering has strike, dip 044,43. The stretching lineation has plunge -> trend of 31 -> 184.	44	43	S0/S1	184	31	L1																							yes
GG69	4411750	467682			Bt-granodiorite, adjacent to quartzite.	The granodiorite is weakly foliated here with no recognizable lineation. Less than 10 meters to the East is quartzite outcrop, indicating an approximate mappable contact.	The foliation in the granodiorite has strike,dip of 035,67.							35	67	S2																				no
GG70	4411653	467856			Schist	This outcrop is at the top of a line of low cliffs running steeply down the hill to the south. The schist has abundant 1-5 cm thick layers of light gray to brown quartzite. The alternating layers of schist and quartzite appear to be relict bedding. However, the schistosity in adjacent mica-rich layers is penetrative so the main layering is also a tectonic foliation. Additionally, there are numero…	A typical orientation for the bedding/schistosity is strike,dip 037,45. The stretching lineation on this surface has plunge -> trend of 22 -> 183. Three more measurements of this same lineation on different surfaces is (2) 26 -> 193, (3) 10 -> 010, and (4) 53 -> 015. The axial surface of one of the folds has strike,dip of 078,85 and a hinge plunge -> trend of 12 -> 069. A second axial surface has…	37	45	S0/S1	183	22	L1													48	80			F2					yes	yes
											193	26	L1													78	85	69	12	F2
											10	10	L1															91	19	F2
											15	53	L1															74	18	F2
GG71	4411770	468377			Bt-granodiorite, adjacent to quartzite.	This outcrop displays strongly foliated (mylonitic) granodiorite with a well-developed stretching lineation defined by smeared quartz and feldspar. Several asymmetric porphyroclasts indicate SE-side-up sense of shear with fairly high confidence (confidence 4 on a scale of 1 to 5). An outcrop about 2 meters away to the NW is quartzite with a similarly oriented foliation, indicating a contact betwe…	Mylonitic foliation in the granodiorite has strike, dip is 073,80. The stretching lineation plunge -> trend is 74 -> 236.													73	80	Sm	236	74	Lm									SE-side up, CL-4 In granodiorite		no
																																		SE-side up, CL-2 in quartzite
GG72	4411639	468095			Quartzite	Light gray quartzite with strongly developed penetrative foliation - mylonitic. A prominent penetrative foliation is the most obvious structure, and a strong lineation is defined by align­ment of white mica flakes and streaks of slightly different shaded quartz.	The mylonitic foliation strike, dip is 068,88. The lineation plunge -> trend is 75 -> 210.													68	88	Sm	210	75	Lm											no
GG73	4411559	467574			Bt-granodiorite	This granodiorite has a weak foliation defined by biotite alignment and light colored streaks of quartz and feldspar. The foliation is not mylonitic in that there are not abundant tails of recrystallized material around phenocrysts. There is no recognizable lineation.	The foliation strike, dip is 042,43.							42	43	S2																				yes
GG74	4411743	467902			Quartzite, adjacent to schist.	This outcrop is mostly light gray quartzite but the northern part of the outcrop is schist with 1-5 cm thick layers of light gray to brown quartzite. This suggests a possibly mappable contact. The compositional layers in the schist appear to be relict bedding, but the parallel schistosity in the mica-rich layers is penetrative and so likely a tectonic foliation.	The bedding/foliation strike, dip is 041,53.	41	53	S0/S1																										yes
GG75	4411802	467979			Schist	This outcrop of Bt-Ms-schist has abundant 1-5 cm thick layers of light gray to brown quartzite. The alternating layers of schist and quartzite appear to be relict bedding. However, the schistosity in adjacent mica-rich layers is penetrative so the main layering is also a tectonic foliation. Additionally, there are numerous dm- to cm-scale upright and shallowly plunging folds of the bedding/schist…	A typical orientation for the bedding/schistosity is strike,dip 052,47. The stretching lineation on this surface has plunge -> trend of 40 -> 205. The hinge of one of the folds has a plunge -> trend of 21 -> 073.	52	47	S0/S1	205	40	L1															73	21	F2						no
GG76	4411922	468063			Schist.	This locality has several small outcrops of Garnet-biotite-muscovite schist. The compositional layers in the schist appear to be relict bedding, but the parallel schistosity is penetrative and so likely a tectonic foliation. A white mica mineral lineation is also present. Centimeter-scale inclined and shallowly plunging folds locally occur.	The bedding/schistosity strike,dip 047,42. The mineral lineation in the schist has a plunge -> trend of 26 -> 194. The axial surface of one of the inclined folds has strike,dip is 265,59. The hinge of the fold has a plunge -> trend of 09 -> 060.	47	42	S0/S1	194	26	L1													265	59	60	9	F2						no
GG77	4411849	468058			Schist, in contact with quartzite.	This outcrop is mostly Garnet-andalusite-biotite-muscovite schist (with abundant 1-5 cm thick layers of light gray to brown quartzite). However, the southern part of the outcrop is pure quartzite, which suggests a possibly mappable contact between schist to the NW and quartzite to the SE. The compositional layers in the schist appear to be relict bedding, but the parallel schistosity in the mica-…	The bedding/schistosity strike,dip 053,64. The axial surface of one of the upright folds has strike,dip is 225,83.	53	64	S0/S1																225	83			F2						no
GG78	4412009	468059			Light gray quartzite adjacent to foliated Bt-granodiorite.	This locality has small outcrops that can be used to approximate the contact between quartzite to the S and granodiorite to the N to within ~5 meters. Abundant pieces of quartzite float are conglomeratic.	No measurements made at this locality.	33	69	S0/S1																										yes
GG79	4411898	468515			Schist, adjacent to quartzite.	This outcrop has a possibly mappable contact between quartzite on the SE side and schist on the NW. The schist has abundant 1-5 cm thick layers of light gray to brown quartzite alternating with schist, which probably represents a relict bedding. But the parallel schistosity in the mica-rich layers is penetrative and so likely a tectonic foliation, meaning that the bedding has been transposed into…	The bedding/foliation in the schist has a strike, dip of 255,72.	255	72	S0/S1																										no
GG80	4411690	467892			Schist, adjacent to quartzite.	This spectacular outcrop has Grt-Ms schist making up the lower half and massive layered quartzite on the top (photo), making a possibly mappable contact. The schist has abundant 1-5 cm thick layers of light gray to brown quartzite alternating with schist, which probably represents a relict bedding. But the parallel schistosity in the mica-rich layers is penetrative and so likely a tectonic foliat…	The bedding/schistosity has variable strike and dip due to the folding. One set of measurements on different fold limbs are 038,30 and 280,14. If you choose to only plot one on the map, choose the latter as it is more representative of the whole outcrop. A representative cm-scale fold has axial surface strike, dip of 074,86 and a hing plunge -> trend of 27 -> 074.	38	30	S0/S1																74	86	74	27	F2						yes
								280	14	S0/S1
								345	10	S0/S1
GG81	4411670	468039			Schist, adjacent to quartzite	This is a large outcrop that has a contact between quartzite on the NW side and schist on the SE. The schist has abundant 1-5 cm thick layers of light gray to brown quartzite alternating with schist, which probably represents a relict bedding. But the parallel schistosity in the mica-rich layers is penetrative and so likely a tectonic foliation, meaning that the bedding has been transposed into t…	The layering/schistosity has strike,dip of 054,86.	54	86	S0/S1/S2																										yes
GG82	4411709	468127			Schist, adjacent to quartzite	This outcrop that has a possibly mappable contact between quartzite on the NW side and schist on the SE. The schist has abundant 1-5 cm thick layers of light gray to brown quartzite alternating with schist, which probably represents a relict bedding. But the parallel schistosity in the mica-rich layers is penetrative and so likely a tectonic foliation, meaning that the bedding has been transposed…	The foliation strike,dip is 061,78.	61	78	S0/S1/S2																										no
GG83	4411789	468140			Bt-granodiorite	This outcrop of granodiorite, in a narrow ravine, is strongly foliated.	The foliation strike, dip is 070,60.							70	60	S2																				yes
GG84	4412260	468205	39.8617	-105.373	Bt-granodiorite.	This outcrop of granodiorite is on a ridgetop near the junction between two segments of the Burro Trail. It is moderately foliated.	The foliation strike, dip is 043,45.							68	60	S2																				yes
														43	45	S2
GG85	4411987	468343			Schist, adjacent to quartzite	This locality is along the eastern section of the Burro trail. There is no in place outcrop (so no measurements) but the dominance of float lithology changes abruptly over a several meter distance, suggesting a potentially mappable contact between schist to the NW (photo) and quartzite to the SE (photo) to within about 10 meters. The schist locally contains garnet (photo).	No measurement made here.																													yes
GG86	4411846	468450			Schist.	The steeply dipping schist here has abundant 1-5 cm thick layers of light gray to brown quartzite alternating with schist, which probably represents a relict bedding. But the parallel schistosity in the mica-rich layers is penetrative and so likely a tectonic foliation. That this foliation may represent a relatively high degree of strain is suggested by the common presence of long thin and discon…	The bedding/schistosity has strike,dip 260,84.	260	84	S0/S1/S2																										yes
GG87	4412110	468246			Quartzite	Quartzite with cm- to dm-scale layers of grayish white massive quartzite separated by 1-2 cm thick layers of micaceous quartzite. The layers could be interpreted as relict bedding but the thin micaceous layers have a penetrative cleavage that is nearly parallel to the larger scale alternating layers, suggesting a tectonic foliation parallel to the relict bedding.	Bedding (and penetrative foliation) strike, dip is 055,55.	55	55	S0/S1																										no
GG88	4411541	468437			Bt-granodiorite.	The granodiorite is strongly foliated (mylonitic) here with a well-developed stretching lineation defined by smeared feldspar.	The foliation strike,dip is 250,79 and the lineation plunge -> trend is 60 -> 267.													250	79	Sm	267	60	Lm											no
GG89	4411889	468436			Schist	Outcrop on the Burro Trail. The compositional layers in the schist appear to be relict bedding, but the parallel schistosity in the mica-rich layers is penetrative and so likely a tectonic foliation. This is supported by the identification of a small isoclinally folded quartzite layer with an axial surface parallel to the dominant schistosity. This generation of folding must pre-date a second gen…	The orientation of the bedding/schistosity at the scale of the outcrop is approximated by an enveloping surface (across the upright folds) that has strike,dip 237,27. The axial surface of one of the upright folds has a strike,dip of 078,60 and a hinge with a plunge -> trend of 07 -> 080.																			78	60	80	7	F2	237	27	F2		yes	yes
GG90	4411944	468386			Schist	Outcrop on the Burro Trail. The compositional layers in the schist appear to be relict bedding, but the parallel schistosity in the mica-rich layers is penetrative and so likely a tectonic foliation. The overall orientation of the bedding/schistosity appears to have a shallow dip but centimeter- to 10’s of centimeter-scale upright to inclined folds are common and give the schistosity locally stee…	The enveloping surface of a series of tight folds has a strike,dip 290,28. The axial surface of a typical fold has a strike,dip of 228,74 and a hinge with a plunge -> trend of 26 -> 039.																			228	74	39	26	F2	290	28	F2			yes
GG91	4411964	468347			Schist, adjacent to quartzite.	Outcrop on the Burro Trail. This locality contains the approximate contact between schist on the SE and quartzite on the NW (photo). The compositional layers in the schist appear to be relict bedding, but the parallel schistosity in the mica-rich layers is penetrative and so likely a tectonic foliation. The overall orientation of the layering in the schist goes from shallowly dipping on the SE to…	A representative measure of the steep bedding/schistosity has a strike,dip 054,80. The lineation has a plunge -> trend of 42 -> 230.							54	80	S2	230	42	L2																	yes
GG92	4412075	468230			Quartzite, adjacent to schist.	This outcrop is about 50 meters below (SW) the Burro Trail. It is quartzite, with cm- to dm-scale layers of grayish white massive quartzite separated by 1-2 cm thick layers of micaceous quartzite. The layers could be interpreted as relict bedding but the thin micaceous layers have a penetrative cleavage that is nearly parallel to the larger scale alternating layers, suggesting a tectonic foliatio…	The bedding/foliation in the quartzite has strike, dip is 048,49.	48	49	S0/S1																										no
GG93	4412089	468327			Biotite-muscovite schist with thin cm-scale quartzite interlayers.	The compositional layers in the schist appear to be relict bedding, but the parallel schistosity in the mica-rich layers is penetrative and so likely a tectonic foliation. Centimeter-scale open to close and upright to moderately inclined folds of the bedding/schistosity are common.	The bedding/schistosity in the schist has typical strike,dip 040,51.	40	51	S0/S1																										yes
GG94	4411947	468174			Schist.	This Bt-Ms-schist has thin cm-scale quartzite layers within it, suggesting a relict bedding now transposed into a foliation.	The bedding/foliation in the schist has strike, dip is 062,38.	62	38	S0/S1																										yes
GG95	4411996	468077			Quartzite.	This quartzite has a prominant layering defined by cm-scale bands of slightly lighter and darker shades of white, gray, and bluish gray that could be interpreted to represent bedding. But there are also aligned mica flakes parallel to the layering suggesting that it may also be a tectonic foliation.	The bedding/foliation has typical strike,dip 052,52.	52	52	S0/S1																										no
GG96	4411959	468055			Schist.	This outcrop is on the Burro Trail. The Bt-Ms-schist has thin cm-scale quartzite layers within it, suggesting a relict bedding now transposed into a foliation.	The bedding/foliation in the schist has strike, dip is 079,71.	79	71	S0/S1																										no
GG97	4411543	467938			Bt-granodiorite, adjacent to quartzite.	This outcrop displays strongly foliated (mylonitic) granodiorite with a well-developed stretching lineation defined by smeared quartz and feldspar. An outcrop about 2 meters away to the NW is quartzite with a similarly oriented foliation, indicating a contact between the two lithologies. The quartzite is also strongly mylonitized with a well-developed stretching lineation defined by smeared quart…	Mylonitic foliation in the quartzite has strike, dip is 253,72.													253	72	Sm														no
GG98	4411970	467834			Muscovite-bearing pegmatitic granite.	This granite outcrop at the ridgetop has a moderately developed foliation.	The foliation has strike,dip of 064,67.							64	67	S2																				yes
GG99	4411881	467892			Quartzite, adjacent to schist.	This quartzite has a prominent layering defined by cm-scale bands of slightly lighter and darker shades of white and gray, and by 1-2 cm thick layers with slightly more mica. The layering could be interpreted to represent bedding. The outcrop contains a transitional contact over 1-2 m to dominantly Bt-Ms-schist with local 1-5 cm thick layers of quartzite. This could be a potentially mappable cont…	The bedding/layering strike, dip is 055,73.	55	73	S0/S1																										no
GG100	4411715	467904			Quartzite.	This quartzite has a prominant layering defined by cm-scale bands of slightly lighter and darker shades of white, gray, and bluish gray that could be interpreted to represent bedding. Some layers show the trace of a steeply dipping penetrative foliation defined by white mica flakes and wispy alternating layers of slightly differently colored quartz.	The bedding has typical strike,dip 305,18. The steeper foliation strike, dip is 052,78.	305	18	S0/S1				52	78	S2																				yes
GG101	4411884	467732			Bt-granodiorite, adjacent to quartzite.	This granodiorite is weakly foliated. Less than 5 meters to the East is quartzite outcrop, indicating a mappable contact.	The foliation in the granodiorite has strike,dip of 061,55.							61	55	S2																				no
GG102	4411865	468091			Schist, in contact with quartzite.	This outcrop is mostly Garnet-andalusite-biotite-muscovite schist (with abundant 1-5 cm thick layers of light gray to brown quartzite). However, a possibly mappable contact between schist to the NW and quartzite to the SE is also exposed here and is conformable with the prominent layering in the schist. The compositional layers in the schist appear to be relict bedding, but the parallel schistosi…	The bedding/schistosity strike,dip 078,64. The mineral lineation has a plunge -> trend of 41 -> 235.	78	64	S0/S1	235	41	L1																							no
GG103	4411196	468078	39.8521	-105.373	Bt-granodiorite.	The granodiorite is mylonitic here.	Mylonitic foliation strike, dip is 056,43.													56	43	Sm														yes
GG104	4411735	468090	39.8569	-105.373	Schist.	The steeply dipping schist here has abundant 1-5 cm thick layers of light gray to brown quartzite alternating with schist, which probably represents a relict bedding. But the parallel schistosity in the mica-rich layers is penetrative and so likely a tectonic foliation. This is also supported by the common presence of isoclinally folded and dismembered lenses of quartzite and quartz veins (photo).	The bedding/schistosity (and axial surface of isoclinal folds) has strike,dip 035,90. The hinge of a folded quartzite layer has plunge -> trend of 43 -> 046.																			35	90	46	43	F2						yes
GG105	4411820	467788	39.8577	-105.377	Quartzite	This light gray quartzite has a prominent layering defined by cm-scale bands of slightly lighter and darker shades of gray that could be interpreted to represent bedding.	The bedding strike, dip is 050,61.	50	61	S0/S1																										no
GG106	4411571	467900	39.8554	-105.375	Schist, adjacent to quartzite.	This outcrop has a possibly mappable contact between quartzite on the SE side and schist on the NW. The schist has abundant 1-5 cm thick layers of light gray to brown quartzite alternating with schist, which probably represents a relict bedding. But the parallel schistosity in the mica-rich layers is penetrative and so likely a tectonic foliation, meaning that the bedding has been transposed into…	The bedding/foliation in the schist has a strike, dip of 250,55.	250	55	S0/S1																										no
GG107	4411954	467898	39.8589	-105.375	Quartzite.	This quartzite has a prominant layering defined by cm-scale bands of slightly lighter and darker shades of white, gray, and bluish gray that could be interpreted to represent bedding. But there are also aligned mica flakes parallel to the layering suggesting that it may also be a tectonic foliation.	The bedding/foliation has typical strike,dip 044,64.	44	64	S0/S1																										no
GG108	4412021	467984	39.8595	-105.374	Bt-granodiorite	This outcrop of granodiorite has a weak foliation defined by biotite alignment. There are several large (m-scale) blocks of rock here, and they all appear to be similarly oriented in terms of the foliation. But they all appear to have shifted somewhat, so the measurement taken is approximate.	The foliation has strike,dip of 050,60.							50	60	S1 or S2																				yes
GG109	4412020	468086	39.8595	-105.373	Quartzite	This quartzite has a prominant layering defined by cm-scale bands of slightly lighter and darker shades of white, gray, and bluish gray that could be interpreted to represent bedding. But there are also aligned mica flakes parallel to the layering suggesting that it may also be a tectonic foliation.	The bedding/foliation has typical strike,dip 049,49.	49	49	S0/S1																										yes
GG110	4412164	468147	39.8608	-105.372	Bt-granodiorite	This outcrop of granodiorite has a weak foliation defined by biotite alignment. There are local veins of pink pegmatite.	The foliation has strike,dip of 053,65.							53	65	S1 or S2																				yes
