# Supplementary material for: Virtual mapping and analytical data integration: A teaching module using Precambrian crystalline basement in Colorado's Front Range (USA)
Source: Copernicus journal article supplement (doi:10.5194/gc-2021-9), 2021-05-05
Supplement: Supplementary file 125 [file JonesThrane12Appendix1DZdata.xlsx]

## Sheet: Sheet1
Appendix 1. LA-ICP-MS U-Pb Isotopic Data and Ages
							Corrected isotopic ratios								Ages (Ma)
Analysis	Date		Ua [ppm]	Th/Ucalc	Th/Umeas.		207Pb/235Ub	±2sd	206Pb/238Ub	±2sd	Rhoc	207Pb/206Pbe	±2sd		207Pb/235U	±2s	206Pb/238U	±2s	207Pb/206Pb	±2s	Conc %
Sample J08-PR-Q2: Upper quartzite, Lester Mountain area, Park Range, Colorado (UTM Zone 13, E 339178, N 4514305)
J08PRQ2 322	2009-06-18		544.017	0.866233	0.719644		4.57412	0.118097	0.307796	0.0071	0.893434	0.107781	0.00125		1744.56	21.5159	1729.85	34.9978	1762.24	21.1984	98.1618
J08PRQ2 323	2009-06-18		235.696	0.526887	0.385116		10.9917	0.443484	0.456332	0.01336	0.725625	0.174696	0.00485		2522.43	37.5687	2423.34	59.1394	2603.15	46.2622	93.0927
J08PRQ2 324	2009-06-18		286.735	0.614486	0.475805		4.59211	0.0904732	0.305832	0.00543	0.901174	0.1089	0.00093		1747.84	16.4291	1720.16	26.8061	1781.09	15.5732	96.5791
J08PRQ2 325	2009-06-18		521.192	0.116442	0.0856447		5.19041	0.177306	0.320797	0.00649	0.592231	0.117346	0.00323		1851.04	29.0907	1793.62	31.676	1916.2	49.3791	93.6032
J08PRQ2 326	2009-06-18		143.237	0.336253	0.258724		4.68802	0.11291	0.313526	0.00612	0.81047	0.108446	0.00153		1765.1	20.1584	1758.03	30.0354	1773.48	25.7517	99.129
J08PRQ2 327	2009-06-18		123.698	0.463596	0.35022		11.6499	0.277579	0.487201	0.01038	0.894179	0.173425	0.00185		2576.68	22.2843	2558.56	44.9938	2590.97	17.7967	98.7488
J08PRQ2 328	2009-06-18		186.007	0.462417	0.335797		5.04824	0.13064	0.325836	0.00682	0.808818	0.112367	0.00171		1827.45	21.9353	1818.17	33.1602	1838.05	27.5579	98.9181
J08PRQ2 329	2009-06-18		369.95	0.221824	0.16276		10.4887	0.310949	0.443732	0.00987	0.750291	0.171435	0.00336		2478.92	27.4887	2367.33	44.0713	2571.71	32.759	92.0527
J08PRQ2 330	2009-06-18		181.904	0.352547	0.27004		4.63903	0.113961	0.310203	0.0054	0.708628	0.108463	0.00188		1756.32	20.523	1741.7	26.569	1773.76	31.6368	98.193
J08PRQ2 331	2009-06-18		223.277	0.553551	0.432719		5.57429	0.203432	0.341929	0.00942	0.754892	0.118237	0.00283		1912.14	31.4296	1895.94	45.2529	1929.75	42.8693	98.2484
J08PRQ2 335	2009-06-18		105.824	0.558238	0.401404		14.2118	1.0182	0.538571	0.03727	0.965903	0.191384	0.00355		2763.95	68.0662	2777.46	156.187	2754.09	30.473	100.849
J08PRQ2 336	2009-06-18		96.5132	0.442779	0.306919		3.98388	0.172823	0.258844	0.00696	0.619835	0.111626	0.0038		1630.92	35.2239	1483.93	35.6418	1826.06	61.7362	81.2636
J08PRQ2 337	2009-06-18		433.802	0.293566	0.203602		8.73296	0.43399	0.405618	0.01109	0.55017	0.156151	0.00648		2310.52	45.3056	2194.85	50.8618	2414.4	70.4603	90.9069
J08PRQ2 338	2009-06-18		305.821	0.492204	0.35595		5.1302	0.169269	0.330632	0.00921	0.844251	0.112535	0.00199		1841.12	28.0442	1841.45	44.6197	1840.75	32.0119	100.038
J08PRQ2 339	2009-06-18		436.547	0.423922	0.326263		4.64214	0.0959793	0.310401	0.0058	0.903744	0.108466	0.00096		1756.88	17.2745	1742.68	28.5328	1773.81	16.1544	98.245
J08PRQ2 340	2009-06-18		118.403	0.625014	0.47002		5.42964	0.165874	0.340697	0.00807	0.775351	0.115585	0.00223		1889.55	26.201	1890.02	38.8031	1889.03	34.7233	100.053
J08PRQ2 341	2009-06-18		54.8941	0.290618	0.226165		4.8795	0.187675	0.315514	0.01014	0.835582	0.112165	0.00237		1798.72	32.4223	1767.78	49.6901	1834.78	38.2785	96.3483
J08PRQ2 342	2009-06-18		137.279	0.72086	0.585804		6.03993	0.320677	0.347654	0.00651	0.352694	0.126004	0.00626		1981.62	46.2839	1923.39	31.1404	2042.95	87.8172	94.1477
J08PRQ2 343	2009-06-18		149.679	0.409795	0.311467		11.7839	0.375641	0.48428	0.01331	0.862178	0.176478	0.00285		2587.39	29.8445	2545.88	57.8085	2620.05	26.8667	97.1692
J08PRQ2 344	2009-06-18		132.93	0.49266	0.377312		12.5635	0.301092	0.484558	0.00914	0.787066	0.188045	0.00278		2647.49	22.5439	2547.09	39.6892	2725.14	24.352	93.4662
J08PRQ2 348	2009-06-18		133.885	0.436042	0.367836		10.379	0.326134	0.456667	0.00866	0.603502	0.164837	0.00413		2469.18	29.1098	2424.83	38.3249	2505.89	42.1501	96.7648
J08PRQ2 349	2009-06-18		350.202	0.740747	0.647977		5.11119	0.22983	0.304881	0.01331	0.97087	0.121588	0.00131		1837.97	38.2047	1715.47	65.7567	1979.65	19.1843	86.655
J08PRQ2 350	2009-06-18		376.007	0.181209	0.126157		6.12512	0.331597	0.348607	0.01421	0.752943	0.127432	0.00454		1993.83	47.2892	1927.94	67.9271	2062.84	62.832	93.4606
J08PRQ2 351	2009-06-18		408.491	0.0567334	0.0431378		4.67487	0.103152	0.31362	0.00521	0.752882	0.10811	0.00157		1762.75	18.4586	1758.49	25.5675	1767.8	26.526	99.4735
J08PRQ2 352	2009-06-18		293.303	0.313377	0.210976		6.04887	0.153096	0.361014	0.00821	0.898522	0.12152	0.00135		1982.91	22.0569	1986.98	38.887	1978.67	19.7833	100.42
J08PRQ2 353	2009-06-18		211.796	0.795334	0.611174		12.4917	0.236536	0.496618	0.00725	0.770973	0.18243	0.0022		2642.1	17.8035	2599.25	31.2283	2675.09	19.9578	97.1648
J08PRQ2 354	2009-06-18		501.249	0.0651119	0.0629335		4.45343	0.173239	0.301065	0.01047	0.893993	0.107283	0.00187		1722.34	32.2666	1696.59	51.877	1753.78	31.8935	96.7391
J08PRQ2 355	2009-06-18		451.935	0.721203	0.529913		4.68426	0.123699	0.31376	0.00653	0.788118	0.108278	0.00176		1764.43	22.0999	1759.18	32.042	1770.65	29.6793	99.3522
J08PRQ2 356	2009-06-18		102.359	0.65905	0.508931		11.5058	0.378448	0.469189	0.01267	0.820993	0.177856	0.00334		2565.05	30.7367	2480	55.594	2632.98	31.2034	94.1901
J08PRQ2 357	2009-06-18		387.846	0.476689	0.329216		4.37532	0.165022	0.278498	0.0074	0.704494	0.113943	0.00305		1707.69	31.182	1583.79	37.3125	1863.23	48.3257	85.0027
J08PRQ2 361	2009-06-18		122.431	0.366018	0.269469		4.53017	0.163126	0.302731	0.00715	0.655903	0.108531	0.00295		1736.53	29.9599	1704.84	35.3813	1774.91	49.6044	96.0521
J08PRQ2 362	2009-06-18		616.718	0.0888246	0.0596578		4.53526	0.314331	0.306786	0.02095	0.985288	0.107217	0.00127		1737.46	57.7228	1724.87	103.356	1752.65	21.6766	98.4148
J08PRQ2 363	2009-06-18		163.005	0.515358	0.392319		11.1059	0.264056	0.478747	0.00832	0.730928	0.168247	0.00273		2532.05	22.1512	2521.81	36.2704	2540.28	27.2047	99.2729
J08PRQ2 364	2009-06-18		180.318	0.434461	0.323777		5.01514	0.110134	0.321101	0.00608	0.862232	0.113277	0.00126		1821.88	18.5932	1795.1	29.668	1852.64	20.1072	96.8944
J08PRQ2 365	2009-06-18		426.579	0.213845	0.0974086		4.77079	0.19525	0.322043	0.01166	0.884676	0.107442	0.00205		1779.77	34.3678	1799.7	56.8568	1756.48	34.9	102.46
J08PRQ2 366	2009-06-18		605.869	0.0781942	0.0568369		4.72871	0.171167	0.318162	0.0111	0.963824	0.107794	0.00104		1772.34	30.3475	1780.75	54.2854	1762.45	17.6345	101.038
J08PRQ2 367	2009-06-18		217.57	0.436115	0.333244		4.92355	0.14139	0.310531	0.00735	0.824217	0.114993	0.00187		1806.3	24.241	1743.32	36.1545	1879.78	29.3	92.7404
J08PRQ2 368	2009-06-18		363.668	0.621634	0.526735		3.74357	0.141452	0.255774	0.00746	0.771893	0.106152	0.00255		1580.74	30.2875	1468.19	38.2958	1734.35	44.0615	84.6532
J08PRQ2 369	2009-06-18		602.189	0.28002	0.186608		13.1456	0.659928	0.503381	0.02366	0.936272	0.189401	0.00334		2690.16	47.4046	2628.31	101.461	2736.97	29.0163	96.03
J08PRQ2 370	2009-06-18		327.846	0.349329	0.263899		5.46523	0.113673	0.342875	0.00527	0.738966	0.115603	0.00162		1895.15	17.8546	1900.49	25.2985	1889.31	25.2201	100.592
J08PRQ2 374	2009-06-18		156.064	0.559293	0.438898		11.0718	0.300952	0.465063	0.01034	0.817955	0.172665	0.0027		2529.19	25.3189	2461.88	45.4977	2583.65	26.1064	95.2869
J08PRQ2 375	2009-06-18		456.707	0.384939	0.283504		4.78194	0.132376	0.311974	0.00729	0.844117	0.111169	0.00165		1781.73	23.2511	1750.41	35.82	1818.62	26.9413	96.2497
J08PRQ2 376	2009-06-18		88.644	0.412912	0.338733		5.34251	0.201368	0.331737	0.00885	0.70779	0.116802	0.00311		1875.69	32.2482	1846.79	42.84	1907.85	47.8135	96.7996
J08PRQ2 377	2009-06-18		188.934	0.632261	0.54677		8.33792	0.715656	0.373345	0.03132	0.977384	0.161974	0.00294		2268.45	77.9716	2045.12	147.04	2476.38	30.6257	82.5852
J08PRQ2 378	2009-06-18		187.667	0.184979	0.148601		4.91671	0.149043	0.315157	0.00784	0.820641	0.113148	0.00196		1805.13	25.583	1766.03	38.4292	1850.58	31.3213	95.4315
J08PRQ2 379	2009-06-18		174.174	0.761046	0.573548		5.23418	0.131704	0.3329	0.00592	0.706736	0.114034	0.00203		1858.2	21.4543	1852.42	28.6316	1864.67	32.1331	99.3434
J08PRQ2 380	2009-06-18		490.015	0.0900434	0.0678521		4.71244	0.122264	0.317068	0.00698	0.848499	0.107794	0.00148		1769.45	21.7356	1775.39	34.1641	1762.45	25.0954	100.734
J08PRQ2 381	2009-06-18		444.248	0.329056	0.25762		5.03673	0.139391	0.326275	0.00753	0.833922	0.11196	0.00171		1825.52	23.4498	1820.3	36.6003	1831.48	27.6802	99.3899
J08PRQ2 382	2009-06-18		253.779	0.529576	0.409907		4.92106	0.0979479	0.32107	0.00515	0.805883	0.111163	0.00131		1805.88	16.7983	1794.95	25.1305	1818.51	21.3913	98.7045
J08PRQ2 383	2009-06-18		476.894	0.346246	0.22401		4.94894	0.162591	0.331035	0.00874	0.803626	0.108427	0.00212		1810.64	27.7584	1843.4	42.3298	1773.15	35.69	103.962
J08PRQ2 390	2009-06-18		662.665	0.680854	0.731748		6.02151	0.246734	0.360709	0.01397	0.945181	0.121073	0.00162		1978.96	35.695	1985.53	66.1858	1972.09	23.8461	100.681
J08PRQ2 391	2009-06-18		168.67	0.547056	0.428653		4.86686	0.149817	0.316256	0.00813	0.8351	0.111611	0.00189		1796.54	25.9347	1771.42	39.8175	1825.82	30.7107	97.0204
J08PRQ2 392	2009-06-18		390.765	0.436635	0.331128		5.29017	0.179773	0.318525	0.00981	0.906299	0.120455	0.00173		1867.28	29.0275	1782.52	47.9631	1962.97	25.6232	90.8072
J08PRQ2 393	2009-06-18		572.667	0.110232	0.0448839		4.63406	0.197864	0.307298	0.01187	0.90466	0.109371	0.00199		1755.42	35.6742	1727.39	58.5338	1788.96	33.1476	96.5588
J08PRQ2 394	2009-06-18		840.738	0.111523	0.0774261		10.786	0.566166	0.471959	0.02318	0.935677	0.16575	0.00307		2504.86	48.8137	2492.14	101.525	2515.18	31.1306	99.084
J08PRQ2 395	2009-06-18		135.699	0.320233	0.255565		4.18327	0.180778	0.281882	0.00695	0.570541	0.107634	0.00382		1670.75	35.4282	1600.83	34.951	1759.74	64.8914	90.9701
J08PRQ2 396	2009-06-18		137.423	0.775303	0.576842		7.31536	0.221022	0.393299	0.00954	0.802833	0.1349	0.00243		2150.69	26.9952	2138.11	44.1397	2162.72	31.4147	98.8622
J08PRQ2 397	2009-06-18		382.85	0.669973	0.570883		4.28918	0.125406	0.278033	0.00699	0.859878	0.111886	0.00167		1691.29	24.0792	1581.45	35.258	1830.28	27.0545	86.4046
J08PRQ2 398	2009-06-18		407.926	0.62306	0.482334		5.11325	0.136149	0.325669	0.00733	0.8453	0.113873	0.00162		1838.31	22.6174	1817.35	35.6444	1862.12	25.6873	97.5961
J08PRQ2 399	2009-06-18		83.8466	1.49512	1.16302		5.98219	0.187028	0.3458	0.00728	0.673381	0.125468	0.0029		1973.26	27.205	1914.51	34.8717	2035.41	40.891	94.0601
J08PRQ2 403	2009-06-18		514.947	0.20421	0.222124		2.59326	0.329763	0.164598	0.02084	0.995675	0.114267	0.00135		1298.74	93.4472	982.28	115.368	1868.35	21.3162	52.5747
J08PRQ2 404	2009-06-18		593.066	0.167554	0.132517		4.53275	0.101371	0.302116	0.00564	0.834744	0.108814	0.00134		1737	18.6059	1701.79	27.9222	1779.66	22.4604	95.6246
J08PRQ2 405	2009-06-18		886.895	0.0881648	0.0495768		5.42262	0.352722	0.341054	0.0183	0.824905	0.115315	0.00424		1888.44	55.8198	1891.74	87.9731	1884.81	66.2093	100.368
J08PRQ2 406	2009-06-18		228.109	0.288718	0.2235		5.12396	0.143321	0.334676	0.00823	0.879166	0.11104	0.00148		1840.09	23.7677	1861	39.751	1816.51	24.1998	102.449
J08PRQ2 407	2009-06-18		339.201	0.359532	0.280678		4.70231	0.0940114	0.315095	0.00599	0.950859	0.108235	0.00067		1767.65	16.7417	1765.73	29.3624	1769.92	11.3039	99.7631
J08PRQ2 408	2009-06-18		357.366	0.699186	0.540493		5.46862	0.108038	0.343453	0.00506	0.745732	0.115481	0.00152		1895.68	16.9604	1903.26	24.28	1887.39	23.6939	100.841
J08PRQ2 409	2009-06-18		541.126	0.261067	0.21368		4.46141	0.0955875	0.30241	0.0057	0.879732	0.106998	0.00109		1723.82	17.7734	1703.25	28.2129	1748.9	18.6513	97.3897
J08PRQ2 410	2009-06-18		600.873	0.372891	0.300139		4.99881	0.182588	0.317968	0.01046	0.900623	0.11402	0.00181		1819.12	30.9151	1779.8	51.1628	1864.45	28.6548	95.4596
J08PRQ2 411	2009-06-18		312.011	0.243151	0.176068		4.54704	0.186347	0.306133	0.01185	0.944525	0.107725	0.00145		1739.62	34.1237	1721.65	58.4872	1761.29	24.6058	97.7492
J08PRQ2 412	2009-06-18		381.913	0.586904	0.394417		5.0151	0.246006	0.319299	0.01316	0.840219	0.113915	0.00303		1821.87	41.5503	1786.31	64.3051	1862.79	48.0231	95.8944
J08PRQ2 416	2009-06-18		736.656	0.140206	0.143171		2.71972	0.411126	0.120914	0.01818	0.994639	0.163134	0.00255		1333.86	112.687	735.823	104.563	2488.41	26.3425	29.5701
J08PRQ2 417	2009-06-18		624.699	0.0795285	0.0632719		3.94987	0.161035	0.266338	0.00981	0.903438	0.107559	0.00188		1623.96	33.0453	1522.19	49.9397	1758.48	31.9631	86.5628
J08PRQ2 418	2009-06-18		225.001	0.546268	0.43287		5.14525	0.150397	0.330084	0.00849	0.879932	0.113053	0.00157		1843.61	24.8552	1838.79	41.1484	1849.05	25.1147	99.4448
J08PRQ2 419	2009-06-18		331.179	0.488091	0.363738		3.99581	0.331618	0.267439	0.02171	0.978143	0.108363	0.00187		1633.34	67.4997	1527.79	110.432	1772.07	31.5042	86.2148
J08PRQ2 420	2009-06-18		483.758	0.552842	0.414066		4.6433	0.174989	0.311102	0.01042	0.888752	0.108249	0.00187		1757.09	31.4954	1746.13	51.2341	1770.15	31.5448	98.6427
J08PRQ2 421	2009-06-18		1076.53	0.46373	0.341003		5.02277	0.17128	0.334645	0.00941	0.824599	0.108857	0.0021		1823.17	28.8839	1860.86	45.4516	1780.38	35.1821	104.52
J08PRQ2 422	2009-06-18		88.4195	0.270526	0.215713		4.46604	0.165085	0.302586	0.00815	0.72866	0.107047	0.00271		1724.68	30.6758	1704.12	40.3344	1749.73	46.3455	97.393
J08PRQ2 423	2009-06-18		120.605	0.361078	0.284064		13.1256	0.261261	0.510819	0.00851	0.836966	0.186359	0.00203		2688.72	18.7822	2660.12	36.3112	2710.3	17.9679	98.1488
J08PRQ2 424	2009-06-18		1611.7	0.0531118	0.0527678		5.58276	0.720114	0.226685	0.02878	0.984273	0.178618	0.00407		1913.44	111.523	1317.1	151.271	2640.08	37.8354	49.8887
J08PRQ2 425	2009-06-18		370.214	0.57036	0.433165		4.95843	0.195162	0.329935	0.0122	0.939463	0.108997	0.00147		1812.26	33.2697	1838.07	59.1371	1782.72	24.5888	103.105
J08PRQ2 429	2009-06-18		602.497	0.37352	0.212398		4.38889	0.407415	0.280886	0.02565	0.983728	0.113324	0.00189		1710.25	76.9126	1595.82	129.108	1853.4	30.1453	86.1024
J08PRQ2 430	2009-06-18		47.8085	0.674364	0.499401		8.71849	0.377359	0.379977	0.01138	0.691946	0.166411	0.0052		2309.01	39.4461	2076.17	53.1617	2521.87	52.4852	82.3268
J08PRQ2 431	2009-06-18		213.674	0.521425	0.398912		5.12002	0.107353	0.32404	0.00546	0.803621	0.114597	0.00143		1839.43	17.813	1809.43	26.5835	1873.55	22.5003	96.5773
J08PRQ2 432	2009-06-18		270.021	0.355391	0.259766		10.9712	0.283463	0.459406	0.01041	0.877027	0.173204	0.00215		2520.69	24.0474	2436.94	45.9833	2588.84	20.7133	94.1323
J08PRQ2 433	2009-06-18		195.874	0.498624	0.378198		10.2707	0.250078	0.456665	0.00922	0.829198	0.163118	0.00222		2459.47	22.5333	2424.82	40.8033	2488.24	22.9362	97.4511
J08PRQ2 434	2009-06-18		388.515	0.21251	0.147394		4.65455	0.180671	0.311094	0.01089	0.90183	0.108514	0.00182		1759.11	32.454	1746.09	53.5454	1774.61	30.6095	98.3926
J08PRQ2 435	2009-06-18		1111.39	0.400751	0.214642		5.26449	0.438504	0.348352	0.02808	0.967746	0.109607	0.0023		1863.12	71.1916	1926.72	134.269	1792.88	38.2103	107.465
J08PRQ2 436	2009-06-18		236.688	0.596777	0.466018		5.15552	0.124826	0.327449	0.00687	0.866524	0.11419	0.00138		1845.31	20.5935	1826	33.3627	1867.14	21.8078	97.797
J08PRQ2 437	2009-06-18		395.423	0.608902	0.459201		6.78553	0.183368	0.380051	0.00957	0.931817	0.129491	0.00127		2083.84	23.9192	2076.52	44.7036	2091.08	17.2415	99.304
J08PRQ2 438	2009-06-18		606.64	0.212488	0.184672		2.93458	0.271499	0.20179	0.01763	0.944345	0.105474	0.00321		1390.87	70.1763	1184.93	94.5743	1722.59	55.9046	68.7875
J08PRQ2 442	2009-06-18		132.527	0.271528	0.210026		4.74769	0.133407	0.306019	0.00679	0.789631	0.112521	0.00194		1775.7	23.5719	1721.09	33.5152	1840.52	31.2124	93.5107
J08PRQ2 443	2009-06-18		94.8905	0.315919	0.233037		4.6034	0.153005	0.306187	0.00813	0.798871	0.109041	0.00218		1749.88	27.7327	1721.91	40.1245	1783.46	36.4468	96.549
J08PRQ2 444	2009-06-18		136.062	1.00245	0.77186		5.02344	0.156016	0.31623	0.00783	0.797245	0.115212	0.00216		1823.28	26.3057	1771.29	38.3489	1883.2	33.7659	94.0576
J08PRQ2 445	2009-06-18		176.169	0.184008	0.14246		5.01009	0.136895	0.320552	0.00734	0.838025	0.113356	0.00169		1821.03	23.1318	1792.42	35.8314	1853.91	26.9461	96.6837
J08PRQ2 446	2009-06-18		315.284	1.01082	0.738372		10.3412	0.320786	0.458515	0.01357	0.954078	0.163575	0.00152		2465.8	28.7277	2433	59.9791	2492.96	15.6527	97.5948
J08PRQ2 447	2009-06-18		491.999	0.0972535	0.0729333		4.54868	0.11584	0.305584	0.00696	0.894343	0.107958	0.00123		1739.92	21.2013	1718.94	34.3658	1765.23	20.8174	97.3777
J08PRQ2 448	2009-06-18		120.858	0.946064	0.740555		11.9387	0.327701	0.485472	0.00964	0.723422	0.178357	0.00338		2599.6	25.7223	2551.06	41.8347	2637.65	31.4743	96.7169
J08PRQ2 449	2009-06-18		271.365	0.37196	0.275206		5.29722	0.156423	0.334914	0.00852	0.861495	0.114713	0.00172		1868.41	25.2273	1862.16	41.1444	1875.38	27.0299	99.2949
J08PRQ2 450	2009-06-18		435.729	0.0715003	0.0615272		4.57496	0.156165	0.305623	0.01012	0.970063	0.108568	0.0009		1744.72	28.4501	1719.13	49.9677	1775.52	15.1274	96.8242
J08PRQ2 451	2009-06-18		610.392	0.0774796	0.0655052		4.65486	0.127121	0.314637	0.00687	0.799529	0.107299	0.00176		1759.17	22.8297	1763.48	33.6878	1754.04	30.0121	100.538
J08PRQ2 452	2009-06-18		607.945	0.107939	0.0851958		4.81493	0.244835	0.318909	0.01349	0.831884	0.109502	0.00309		1787.51	42.7774	1784.4	65.9372	1791.14	51.3948	99.6234
J08PRQ2 456	2009-06-18		414.571	0.264564	0.165518		4.57578	0.116205	0.307765	0.00708	0.90585	0.107831	0.00116		1744.87	21.1646	1729.7	34.9001	1763.09	19.6608	98.1057
J08PRQ2 457	2009-06-18		66.852	0.443128	0.342758		17.5592	1.14031	0.58223	0.02298	0.607769	0.218731	0.01128		2965.9	62.4654	2957.84	93.6331	2971.37	83.1009	99.5447
J08PRQ2 458	2009-06-18		805.864	0.285779	0.234896		4.8615	0.120472	0.316597	0.00664	0.846339	0.111368	0.00147		1795.61	20.8723	1773.09	32.5115	1821.87	23.9497	97.3226
J08PRQ2 459	2009-06-18		231.263	0.37214	0.220902		10.8688	0.538064	0.466187	0.02104	0.911659	0.169091	0.00344		2511.97	46.0634	2466.82	92.5134	2548.66	34.0807	96.7887
J08PRQ2 460	2009-06-18		703.025	0.144082	0.0716769		4.52694	0.118507	0.305397	0.00712	0.890587	0.107507	0.00128		1735.93	21.7749	1718.02	35.1609	1757.59	21.775	97.7483
J08PRQ2 461	2009-06-18		63.0317	1.52408	1.19809		13.4187	0.575487	0.520193	0.0172	0.770972	0.187087	0.00511		2709.58	40.5481	2700	72.9401	2716.73	45.0266	99.3842
J08PRQ2 462	2009-06-18		297.884	0.163494	0.124962		8.03255	0.182883	0.414335	0.00844	0.894684	0.140605	0.00143		2234.69	20.5614	2234.71	38.4692	2234.67	17.5978	100.002
J08PRQ2 463	2009-06-18		705.253	0.0310024	0.0253563		4.88194	0.129921	0.329658	0.00823	0.938104	0.107406	0.00099		1799.14	22.4315	1836.72	39.901	1755.86	16.8612	104.605
J08PRQ2 464	2009-06-18		333.631	0.585204	0.451487		4.25396	0.198866	0.28305	0.01286	0.971875	0.109	0.0012		1684.5	38.4513	1606.71	64.6145	1782.78	20.0717	90.1237
J08PRQ2 468	2009-06-18		358.659	0.231428	0.167449		5.29221	0.226862	0.335815	0.01231	0.855132	0.114297	0.00254		1867.61	36.6249	1866.51	59.4076	1868.83	40.0931	99.8755
J08PRQ2 469	2009-06-18		491.702	0.127719	0.0823164		4.76914	0.190992	0.319657	0.01249	0.975674	0.108207	0.00095		1779.48	33.6273	1788.05	61.0144	1769.45	16.033	101.052
J08PRQ2 470	2009-06-18		207.777	0.624612	0.473985		4.97961	0.113533	0.319075	0.00557	0.765657	0.113188	0.00166		1815.86	19.2811	1785.21	27.2212	1851.22	26.5157	96.4341
J08PRQ2 471	2009-06-18		181.963	0.563846	0.427693		5.01347	0.114417	0.31888	0.00551	0.757133	0.114028	0.0017		1821.6	19.3218	1784.26	26.9319	1864.57	26.9112	95.6925
J08PRQ2 472	2009-06-18		494.832	0.107769	0.0817054		4.90423	0.089982	0.318205	0.00526	0.900935	0.111779	0.00089		1802.98	15.4759	1780.96	25.7231	1828.55	14.4351	97.3974
Sample J08-PR-Q1: Lower quartzite, Lester Mountain area, Park Range, Colorado (UTM Zone 13, E 339378, N 4514522)
J08PRQ1 163	2009-06-18		530.355	0.485832	0.371587		3.37478	0.130192	0.227691	0.00813	0.925567	0.107498	0.00157		1498.56	30.2263	1322.39	42.69	1757.43	26.7114	75.2456
J08PRQ1 164	2009-06-18		616.772	0.0826537	0.0637948		2.76337	0.21082	0.187464	0.01369	0.957224	0.10691	0.00236		1345.7	56.9402	1107.62	74.3225	1747.4	40.4231	63.3868
J08PRQ1 165	2009-06-18		286.404	0.393385	0.259415		4.9555	0.347459	0.334456	0.02225	0.948801	0.10746	0.00238		1811.76	59.3074	1859.94	107.494	1756.79	40.5097	105.872
J08PRQ1 166	2009-06-18		246.838	0.948358	0.714349		13.6007	0.442932	0.526228	0.01478	0.862433	0.187451	0.00309		2722.31	30.8124	2725.54	62.4291	2719.92	27.1666	100.207
J08PRQ1 167	2009-06-18		374.945	0.335703	0.243685		4.91988	0.203607	0.315212	0.01159	0.88847	0.113201	0.00215		1805.67	34.9366	1766.31	56.809	1851.43	34.3378	95.4024
J08PRQ1 168	2009-06-18		396.007	0.201085	0.131791		4.79566	0.212298	0.315872	0.01304	0.932543	0.110112	0.00176		1784.14	37.2107	1769.54	63.8846	1801.26	29.075	98.239
J08PRQ1 169	2009-06-18		1314.87	0.385856	0.258542		2.76761	0.127163	0.189302	0.00724	0.832389	0.106034	0.0027		1346.84	34.2839	1117.59	39.2437	1732.32	46.7169	64.5142
J08PRQ1 170	2009-06-18		320.004	0.341257	0.250472		4.79934	0.181535	0.311631	0.01116	0.946774	0.111697	0.00136		1784.78	31.7945	1748.73	54.8506	1827.2	22.0781	95.7051
J08PRQ1 171	2009-06-18		853.418	0.320098	0.297551		0.700777	0.0921626	0.0465519	0.00565	0.922862	0.10918	0.00553		539.255	55.0761	293.317	34.8025	1785.77	92.3111	16.4252
J08PRQ1 172	2009-06-18		992.657	0.024749	0.0382433		1.55307	0.504797	0.0965852	0.03131	0.997346	0.116621	0.00276		951.713	203.443	594.366	184.11	1905.07	42.5125	31.1991
J08PRQ1 176	2009-06-18		284.626	0.833369	0.681366		6.94976	0.892404	0.298786	0.03804	0.99149	0.168697	0.00282		2105.03	114.465	1685.29	188.862	2544.76	28.0141	66.2258
J08PRQ1 177	2009-06-18		1637.34	0.188547	0.153408		2.98192	0.172335	0.203828	0.01041	0.883713	0.106104	0.00287		1403.02	43.9725	1195.85	55.7462	1733.53	49.6182	68.9836
J08PRQ1 178	2009-06-18		442.544	0.686757	0.485764		10.4541	0.386008	0.466942	0.01616	0.937275	0.162375	0.00209		2475.85	34.2319	2470.14	71.0173	2480.55	21.7085	99.5803
J08PRQ1 179	2009-06-18		1877.99	0.0279914	0.0340434		2.17941	0.249843	0.115312	0.00402	0.304105	0.137077	0.01497		1174.49	79.9554	703.522	23.2354	2190.6	189.873	32.1155
J08PRQ1 180	2009-06-18		800.415	0.291431	0.180233		2.74686	0.428493	0.185245	0.02744	0.949576	0.107545	0.00526		1341.24	116.63	1095.57	149.27	1758.22	89.4438	62.311
J08PRQ1 181	2009-06-18		1355.11	0.521196	0.321768		4.8323	0.486657	0.329794	0.03284	0.988762	0.10627	0.0016		1790.54	84.9228	1837.38	159.23	1736.39	27.6087	105.816
J08PRQ1 182	2009-06-18		341.792	0.193772	0.134145		3.6088	0.29038	0.243368	0.01859	0.949318	0.107547	0.00272		1551.47	64.0597	1404.18	96.3896	1758.27	46.251	79.8617
J08PRQ1 183	2009-06-18		1140.27	0.356406	0.235535		1.16934	0.103732	0.0743165	0.00638	0.967755	0.114118	0.00255		786.337	48.5898	462.109	38.2835	1866.01	40.3278	24.7646
J08PRQ1 184	2009-06-18		290.441	0.505459	0.368783		4.35693	0.118413	0.282064	0.00597	0.778768	0.112029	0.00191		1704.21	22.4483	1601.75	30.0183	1832.59	30.8944	87.4035
J08PRQ1 185	2009-06-18		341.78	0.657984	0.43874		4.34834	0.466069	0.286197	0.0296	0.964941	0.110194	0.0031		1702.58	88.7082	1622.49	148.381	1802.61	51.1652	90.0082
J08PRQ1 192	2009-06-18		907.54	0.457773	0.35846		5.5635	0.384847	0.342965	0.0222	0.935755	0.117651	0.00287		1910.47	59.6048	1900.92	106.573	1920.85	43.7377	98.9625
J08PRQ1 193	2009-06-18		467.79	0.429932	0.299323		5.34914	0.405139	0.34256	0.02554	0.984383	0.113252	0.00151		1876.75	64.8798	1898.97	122.647	1852.24	24.1031	102.523
J08PRQ1 194	2009-06-18		198.188	0.578062	0.428878		8.24272	0.230321	0.410902	0.00998	0.869219	0.145489	0.00201		2258.05	25.3077	2219.04	45.5994	2293.57	23.7546	96.7506
J08PRQ1 195	2009-06-18		261.369	0.14616	0.118593		4.19966	0.140446	0.27946	0.00865	0.925556	0.108992	0.00138		1673.95	27.4327	1588.64	43.5827	1782.63	23.0847	89.1178
J08PRQ1 196	2009-06-18		567.284	0.125081	0.104234		2.51364	0.197706	0.15676	0.01127	0.914054	0.116296	0.00371		1275.98	57.1941	938.747	62.8076	1900.06	57.3393	49.4062
J08PRQ1 197	2009-06-18		478.178	0.262884	0.192251		4.55036	0.206567	0.308331	0.01248	0.891626	0.107035	0.0022		1740.23	37.8068	1732.49	61.4934	1749.54	37.6286	99.0253
J08PRQ1 198	2009-06-18		858.137	0.233167	0.135428		1.83007	0.162469	0.122005	0.01048	0.967561	0.108789	0.00244		1056.3	58.3555	742.096	60.214	1779.24	40.9095	41.7086
J08PRQ1 199	2009-06-18		310.726	0.663844	0.500786		5.51133	0.129837	0.343342	0.00699	0.864191	0.11642	0.00138		1902.36	20.2495	1902.73	33.5438	1901.97	21.3008	100.04
J08PRQ1 200	2009-06-18		687.621	0.155743	0.0935202		5.07323	0.230293	0.344617	0.01422	0.909007	0.106769	0.00202		1831.64	38.5211	1908.84	68.1766	1744.98	34.6556	109.39
J08PRQ1 201	2009-06-18		612.63	0.141341	0.174924		0.714426	0.59969	0.0477702	0.04009	0.999791	0.108467	0.00186		547.371	370.823	300.817	246.774	1773.83	31.2986	16.9586
J08PRQ1 205	2009-06-18		943.234	0.313507	0.20762		4.17931	0.183759	0.275578	0.00844	0.696551	0.109991	0.00347		1669.97	36.0404	1569.05	42.654	1799.26	57.4011	87.2056
J08PRQ1 206	2009-06-18		1280.69	0.28507	0.232068		4.64189	0.215746	0.252922	0.00847	0.720523	0.133109	0.00429		1756.84	38.8472	1453.53	43.5797	2139.38	56.3524	67.9417
J08PRQ1 207	2009-06-18		958.568	0.0649549	0.0395341		1.82584	0.145216	0.117673	0.00833	0.890056	0.112534	0.00408		1054.78	52.2251	717.154	48.0459	1840.74	65.633	38.96
J08PRQ1 208	2009-06-18		1036.71	0.0835295	0.0537801		2.01571	0.15913	0.136428	0.01054	0.978618	0.107158	0.00174		1120.82	53.6285	824.432	59.7901	1751.63	29.719	47.0664
J08PRQ1 209	2009-06-18		568.127	0.390316	0.29687		3.37743	0.608485	0.152229	0.02737	0.997962	0.160912	0.00185		1499.17	142.063	913.445	153.157	2465.26	19.4202	37.0526
J08PRQ1 210	2009-06-18		1285.63	0.0496365	0.0407042		1.2812	0.156598	0.0875909	0.0106	0.9901	0.106086	0.00182		837.389	69.8128	541.274	62.8308	1733.21	31.4719	31.2295
J08PRQ1 211	2009-06-18		1427.64	0.0478507	0.0376266		1.55073	0.230176	0.105901	0.0151	0.960624	0.106203	0.00438		950.784	91.8774	648.898	88.025	1735.23	75.6376	37.3955
J08PRQ1 212	2009-06-18		894.332	0.0647527	0.0741516		1.4088	0.267636	0.094174	0.0176	0.983756	0.108497	0.0037		892.654	113.284	580.175	103.701	1774.33	62.2398	32.6982
J08PRQ1 213	2009-06-18		282.029	0.243742	0.15955		4.76611	0.220575	0.31919	0.01314	0.889513	0.108296	0.00229		1778.95	38.8612	1785.77	64.2126	1770.95	38.6091	100.837
J08PRQ1 214	2009-06-18		339.305	0.11596	0.0941159		3.42267	0.193108	0.231562	0.01202	0.92003	0.1072	0.00237		1509.61	44.363	1342.68	62.9187	1752.36	40.4597	76.6215
J08PRQ1 218	2009-06-18		373.763	0.420379	0.313141		4.84501	0.222189	0.311295	0.01272	0.891022	0.112881	0.00235		1792.75	38.6168	1747.07	62.5343	1846.31	37.6617	94.6251
J08PRQ1 219	2009-06-18		619.289	0.0829159	0.0782993		2.58991	0.476576	0.173904	0.03154	0.985607	0.108012	0.00336		1297.79	135.597	1033.59	173.241	1766.15	56.8318	58.5219
J08PRQ1 220	2009-06-18		734.697	0.0694386	0.0584044		1.84852	0.753415	0.123793	0.05035	0.997913	0.1083	0.00285		1062.9	275.101	752.36	289.016	1771.01	48.0487	42.4821
J08PRQ1 221	2009-06-18		166.414	0.500703	0.399102		3.48257	0.186909	0.227706	0.01037	0.848545	0.110924	0.00315		1523.27	42.3627	1322.47	54.4519	1814.6	51.5725	72.8791
J08PRQ1 222	2009-06-18		332.122	0.449968	0.353371		5.35979	0.262879	0.317109	0.01473	0.947078	0.122585	0.00193		1878.45	41.9944	1775.59	72.097	1994.19	27.9866	89.0383
J08PRQ1 223	2009-06-18		191.819	0.328525	0.223335		4.82804	0.367125	0.320374	0.02306	0.946582	0.109298	0.00268		1789.8	64.0468	1791.56	112.596	1787.75	44.6773	100.213
J08PRQ1 224	2009-06-18		1974.16	0.0891143	0.0764872		1.3845	0.138712	0.0986812	0.00428	0.432902	0.101756	0.00919		882.359	59.1339	606.675	25.1126	1656.39	167.298	36.6264
J08PRQ1 225	2009-06-18		858.029	0.0649872	0.0423128		3.03015	0.433607	0.20155	0.02872	0.995791	0.109038	0.00143		1415.24	109.67	1183.64	154.114	1783.41	23.9086	66.3696
J08PRQ1 227	2009-06-18		958.954	0.0406993	0.0352206		1.78355	0.139113	0.115526	0.00847	0.939985	0.111971	0.00298		1039.47	50.7881	704.759	48.9475	1831.65	48.2324	38.4768
J08PRQ1 231	2009-06-18		385.237	0.879485	0.470888		5.19932	0.555869	0.328484	0.03476	0.989782	0.114797	0.00175		1852.51	91.2906	1831.03	168.71	1876.7	27.4769	97.5665
J08PRQ1 232	2009-06-18		1269.04	0.116055	0.0829003		1.57028	0.182453	0.104866	0.0115	0.943819	0.108603	0.00417		958.538	72.1989	642.865	67.0999	1776.11	70.0624	36.1952
J08PRQ1 233	2009-06-18		548.825	0.478133	0.356121		5.58565	0.547938	0.334423	0.03213	0.979393	0.121137	0.0024		1913.89	84.6775	1859.78	155.246	1973.04	35.305	94.26
J08PRQ1 234	2009-06-18		80.0005	1.24659	0.964115		5.17172	0.169205	0.326547	0.00836	0.782496	0.114865	0.00234		1847.97	27.845	1821.62	40.6263	1877.77	36.714	97.0097
J08PRQ1 235	2009-06-18		620.712	0.175214	0.118972		2.97205	0.278539	0.197543	0.01806	0.975496	0.109117	0.00225		1400.5	71.3207	1162.11	97.225	1784.73	37.5851	65.114
J08PRQ1 236	2009-06-18		786.623	0.213611	0.154906		3.42127	0.205438	0.229089	0.0126	0.915948	0.108313	0.00261		1509.29	47.2147	1329.73	66.0877	1771.23	43.9958	75.0734
J08PRQ1 237	2009-06-18		968.565	0.294532	0.200724		11.4157	0.588719	0.487966	0.02428	0.964836	0.169672	0.0023		2557.71	48.1829	2561.87	105.199	2554.41	22.6956	100.292
J08PRQ1 238	2009-06-18		477.723	0.707494	0.492284		3.73488	0.320842	0.242512	0.01858	0.891863	0.111697	0.00434		1578.88	68.9094	1399.74	96.4042	1827.22	70.4545	76.6051
J08PRQ1 239	2009-06-18		905.699	0.0154038	0.0237079		1.30356	0.410293	0.0880633	0.02765	0.997558	0.107358	0.00236		847.293	182.802	544.073	163.852	1755.05	40.2162	31.0004
J08PRQ1 240	2009-06-18		228.639	1.01208	0.852398		4.47302	0.118027	0.288095	0.00627	0.824807	0.112606	0.00168		1725.98	21.9003	1632	31.3792	1841.9	27.0043	88.6043
J08PRQ1 244	2009-06-18		384.097	0.174115	0.198274		1.68293	0.306165	0.113655	0.0206	0.996296	0.107393	0.00168		1002.09	116.378	693.94	119.257	1755.64	28.6171	39.5262
J08PRQ1 245	2009-06-18		677.043	0.130165	0.218061		2.44347	0.296827	0.160712	0.01878	0.961949	0.11027	0.00366		1255.5	87.7436	960.732	104.31	1803.87	60.3567	53.2596
J08PRQ1 246	2009-06-18		1808.79	0.224626	0.194454		2.5146	0.231038	0.165624	0.01504	0.988347	0.110114	0.00154		1276.26	66.8442	987.958	83.1824	1801.29	25.44	54.8472
J08PRQ1 247	2009-06-18		157.304	0.496372	0.378101		9.45066	0.464627	0.39451	0.0183	0.94352	0.173741	0.00283		2382.76	45.1728	2143.71	84.6004	2594.01	27.1665	82.6406
J08PRQ1 248	2009-06-18		1363.19	0.0674538	0.0567445		3.54849	0.141582	0.219388	0.00786	0.897937	0.117308	0.00206		1538.1	31.6162	1278.64	41.5532	1915.62	31.5049	66.7483
J08PRQ1 249	2009-06-18		326.601	0.166644	0.113134		3.70863	0.185042	0.248131	0.01131	0.913536	0.108401	0.0022		1573.23	39.9235	1428.83	58.4161	1772.71	37.0479	80.6014
J08PRQ1 250	2009-06-18		1085.71	0.0132343	0.0435967		2.70893	0.33065	0.190342	0.01988	0.855681	0.10322	0.00652		1330.91	90.7621	1123.23	107.672	1682.81	116.615	66.7471
J08PRQ1 251	2009-06-18		622.482	0.242572	0.175521		6.71868	0.414535	0.298295	0.01794	0.974764	0.163357	0.00225		2075.08	54.5841	1682.85	89.083	2490.7	23.2064	67.5651
J08PRQ1 252	2009-06-18		532.627	0.381853	0.27536		4.5447	0.519619	0.302802	0.03324	0.960113	0.108854	0.00348		1739.19	95.4362	1705.19	164.511	1780.33	58.3038	95.7794
J08PRQ1 253	2009-06-18		77.7825	0.691093	0.55109		17.526	0.730119	0.537944	0.01483	0.66175	0.23629	0.00738		2964.08	40.0374	2774.84	62.163	3095.15	49.8077	89.6511
J08PRQ1 257	2009-06-18		445.461	0.271385	0.184854		5.18572	0.322972	0.308802	0.01893	0.984273	0.121795	0.00134		1850.28	53.0639	1734.81	93.2449	1982.68	19.5834	87.4981
J08PRQ1 258	2009-06-18		695.656	0.180988	0.117935		4.7206	0.248348	0.319687	0.01534	0.912089	0.107096	0.00231		1770.9	44.1085	1788.2	74.9363	1750.57	39.4827	102.15
J08PRQ1 259	2009-06-18		381.768	0.123957	0.0931688		2.66387	0.13963	0.179379	0.00823	0.875307	0.107706	0.00273		1318.49	38.7151	1063.58	44.9854	1760.96	46.3371	60.3978
J08PRQ1 260	2009-06-18		527.52	0.230657	0.18745		2.98034	0.268869	0.189962	0.01617	0.943556	0.113788	0.0034		1402.62	68.6929	1121.17	87.6036	1860.78	53.9604	60.2529
J08PRQ1 261	2009-06-18		420.933	0.186929	0.141399		3.79366	0.299005	0.257783	0.01882	0.926286	0.106734	0.00317		1591.4	63.417	1478.49	96.4638	1744.37	54.4076	84.7576
J08PRQ1 262	2009-06-18		945.809	1.0545	0.251783		0.937432	0.313304	0.0604294	0.02005	0.992749	0.11251	0.00452		671.537	165.653	378.236	121.9	1840.35	72.7305	20.5524
J08PRQ1 263	2009-06-18		1152.43	0.0994097	0.107342		1.45543	0.221447	0.0983423	0.01415	0.945667	0.107337	0.00531		912.12	91.8233	604.687	83.0541	1754.69	90.5084	34.4612
J08PRQ1 265	2009-06-18		272.808	0.408708	0.146969		4.45387	0.547798	0.299594	0.03626	0.984037	0.107821	0.00236		1722.42	102.332	1689.3	179.908	1762.92	40.0045	95.8241
J08PRQ1 270	2009-06-18		903.881	0.0885685	0.0860809		3.66083	0.190845	0.246432	0.01213	0.944199	0.107741	0.00185		1562.87	41.5996	1420.05	62.7371	1761.56	31.3879	80.6129
J08PRQ1 271	2009-06-18		1448.68	0.0946237	0.103947		1.39626	0.339842	0.0968484	0.02345	0.994808	0.104562	0.00259		887.352	144.981	595.913	137.842	1706.62	45.592	34.9178
J08PRQ1 272	2009-06-18		827.218	0.16786	0.109619		2.93631	0.273991	0.201826	0.0179	0.950479	0.105517	0.00306		1391.32	70.7912	1185.12	96.02	1723.35	53.2651	68.7685
J08PRQ1 273	2009-06-18		250.429	0.384324	0.336323		3.39014	0.273421	0.198824	0.0154	0.96037	0.123665	0.00278		1502.12	63.3206	1169	82.8147	2009.77	39.8881	58.1659
J08PRQ1 274	2009-06-18		652.423	0.168601	0.136289		2.86173	0.319468	0.188631	0.02023	0.960693	0.110031	0.00341		1371.9	84.1917	1113.95	109.726	1799.92	56.3837	61.8892
J08PRQ1 275	2009-06-18		631.062	0.259337	0.156216		3.28447	0.177731	0.217523	0.00938	0.796891	0.109511	0.00358		1477.38	42.145	1268.77	49.6652	1791.3	59.5386	70.8298
J08PRQ1 276	2009-06-18		1358.74	0.081323	0.086952		1.35496	0.16541	0.0936457	0.01061	0.928094	0.104939	0.00477		869.7	71.4371	577.062	62.5418	1713.25	83.5947	33.6823
J08PRQ1 277	2009-06-18		176.077	0.238883	0.245876		4.66648	0.151998	0.294372	0.00625	0.651831	0.114972	0.00284		1761.25	27.2432	1663.34	31.1274	1879.45	44.5085	88.5016
J08PRQ1 278	2009-06-18		298.837	0.185813	0.182813		2.88994	0.387872	0.191671	0.0252	0.979592	0.109353	0.00295		1379.29	101.583	1130.42	136.341	1788.67	49.1479	63.1989
J08PRQ1 279	2009-06-18		729.024	0.215744	0.16812		4.0374	0.17912	0.180133	0.00754	0.943491	0.162558	0.00239		1641.76	36.1202	1067.7	41.1874	2482.44	24.792	43.01
J08PRQ1 283	2009-06-18		1151.48	0.32292	0.329361		4.50942	0.526696	0.302809	0.03501	0.989882	0.108007	0.00179		1732.71	97.3672	1705.22	173.274	1766.06	30.2784	96.5553
J08PRQ1 284	2009-06-18		512.764	0.236045	0.15893		3.80403	0.376435	0.252711	0.02463	0.984906	0.109174	0.00187		1593.6	79.7269	1452.44	126.762	1785.68	31.2175	81.3385
J08PRQ1 285	2009-06-18		1215.73	0.164815	0.0658137		2.36337	0.162341	0.159763	0.00979	0.892094	0.107289	0.00333		1231.6	49.0479	955.459	54.4179	1753.87	56.7907	54.4772
J08PRQ1 286	2009-06-18		809.579	0.163036	0.113474		2.80177	0.893217	0.18837	0.05992	0.997781	0.107875	0.00229		1356.01	243.103	1112.54	325.317	1763.82	38.7942	63.0754
J08PRQ1 287	2009-06-18		513.026	0.218403	0.191744		2.60067	0.172532	0.1712	0.0103	0.906879	0.110174	0.00308		1300.83	48.6911	1018.72	56.6938	1802.28	50.8461	56.5237
J08PRQ1 288	2009-06-18		531.977	0.0790801	0.0570231		4.74579	0.47034	0.320721	0.03116	0.980315	0.10732	0.0021		1775.36	83.3039	1793.25	152.12	1754.39	35.8014	102.215
J08PRQ1 289	2009-06-18		629.366	0.0819191	0.0666535		4.05122	0.281592	0.276136	0.01861	0.969592	0.106405	0.00181		1644.55	56.6637	1571.87	94.0153	1738.72	31.1835	90.4039
J08PRQ1 290	2009-06-18		842.051	0.208695	0.148975		2.75427	0.215886	0.182906	0.01337	0.93258	0.109214	0.00309		1343.24	58.4531	1082.83	72.8648	1786.34	51.561	60.6174
J08PRQ1 291	2009-06-18		839.278	0.138975	0.117605		2.45144	0.248993	0.166947	0.01605	0.946522	0.106498	0.00349		1257.85	73.379	995.268	88.6685	1740.32	60.0629	57.1887
J08PRQ1 292	2009-06-18		275.152	0.419569	0.335444		4.29502	0.215779	0.288468	0.01282	0.884601	0.107986	0.00253		1692.41	41.4011	1633.87	64.1427	1765.71	42.8058	92.5332
J08PRQ1 296	2009-06-18		332.295	0.382569	0.288661		8.50477	0.275142	0.390135	0.00925	0.732879	0.158105	0.00348		2286.43	29.4013	2123.45	42.8953	2435.5	37.2916	87.1876
J08PRQ1 297	2009-06-18		150.285	0.315489	0.217503		4.72898	0.317751	0.316766	0.01931	0.907244	0.108275	0.00306		1772.39	56.3749	1773.92	94.5416	1770.59	51.6036	100.188
J08PRQ1 298	2009-06-18		842.38	0.0710802	0.0499545		1.62475	0.323662	0.108083	0.02137	0.992528	0.109026	0.00265		979.832	125.849	661.606	124.338	1783.2	44.3124	37.1022
J08PRQ1 299	2009-06-18		434.161	0.0828658	0.0841186		2.43757	0.224965	0.161408	0.01459	0.979425	0.109529	0.00204		1253.76	66.545	964.597	80.9863	1791.6	33.9202	53.8401
J08PRQ1 300	2009-06-18		369.787	0.279946	0.221786		4.79172	0.160391	0.320876	0.00934	0.869601	0.108306	0.00179		1783.45	28.1264	1794.01	45.5838	1771.12	30.1757	101.292
J08PRQ1 301	2009-06-18		404.526	0.214943	0.165623		3.97004	0.147159	0.261478	0.00768	0.79238	0.110118	0.00249		1628.09	30.0735	1497.4	39.2469	1801.35	41.1319	83.1266
J08PRQ1 302	2009-06-18		574.799	0.201356	0.142763		4.27656	0.102351	0.285926	0.00545	0.796428	0.108477	0.00157		1688.86	19.6981	1621.14	27.3213	1774	26.4157	91.383
J08PRQ1 303	2009-06-18		518.712	0.0658702	0.0475887		3.55359	0.218911	0.236115	0.01345	0.924693	0.109155	0.00256		1539.24	48.8516	1366.47	70.1453	1785.35	42.7455	76.5378
J08PRQ1 305	2009-06-18		375.961	0.320992	0.240889		4.5866	0.140493	0.308731	0.00814	0.860754	0.107748	0.00168		1746.83	25.5405	1734.46	40.0957	1761.68	28.5014	98.455
J08PRQ1 309	2009-06-18		558.174	0.5744	0.413075		3.22951	0.248909	0.206508	0.01484	0.93238	0.113422	0.00316		1464.27	59.825	1210.19	79.2946	1854.96	50.3486	65.2406
J08PRQ1 310	2009-06-18		1091.19	0.0893247	0.0398093		3.46092	0.643421	0.235063	0.04335	0.991975	0.106784	0.00251		1518.36	147.482	1360.98	226.358	1745.23	43.055	77.9827
J08PRQ1 311	2009-06-18		1166.77	0.306241	0.295636		2.64021	0.351513	0.178501	0.02361	0.993466	0.107275	0.00163		1311.92	98.3559	1058.78	129.164	1753.63	27.803	60.3765
J08PRQ1 312	2009-06-18		1027.13	0.104745	0.0917968		3.90471	0.560131	0.260893	0.03615	0.965929	0.108549	0.00403		1614.66	116.468	1494.41	184.87	1775.2	67.7513	84.1823
J08PRQ1 313	2009-06-18		294.571	0.281874	0.215912		4.30229	0.234652	0.282033	0.0146	0.949135	0.110636	0.0019		1693.8	44.965	1601.59	73.416	1809.89	31.206	88.4912
Sample J08-CC-Q11: Quartzite, Coal Creek area, Front Range, Colorado (UTM Zone 13, E 470469, N 4413297)
J08CCQ11 007	2009-06-18		166.97	0.334464	0.292726		3.69952	0.106028	0.254957	0.00665	0.910078	0.105239	0.00125		1571.27	22.9124	1463.99	34.1598	1718.49	21.8295	85.1904
J08CCQ11 008	2009-06-18		123.291	0.4138	0.294436		4.79805	0.159872	0.323189	0.00892	0.828325	0.107673	0.00201		1784.56	28.0047	1805.28	43.4578	1760.41	34.129	102.549
J08CCQ11 009	2009-06-18		109.594	1.16093	0.892294		5.20793	0.110484	0.332168	0.00584	0.828748	0.113712	0.00135		1853.91	18.0729	1848.88	28.2602	1859.57	21.443	99.4254
J08CCQ11 010	2009-06-18		229.157	0.254981	0.193479		4.75025	0.153771	0.316787	0.00953	0.929324	0.108755	0.0013		1776.15	27.1595	1774.02	46.6555	1778.66	21.8046	99.739
J08CCQ11 011	2009-06-18		341.487	0.336931	0.266364		4.41537	0.133317	0.296947	0.00864	0.963645	0.107842	0.00087		1715.23	25.002	1676.15	42.9454	1763.27	14.7439	95.0591
J08CCQ11 012	2009-06-18		380.23	0.193183	0.151689		4.34868	0.124302	0.299757	0.00741	0.864824	0.105217	0.00151		1702.64	23.6015	1690.1	36.7518	1718.11	26.3768	98.3698
J08CCQ11 013	2009-06-18		128.085	1.07961	0.825635		4.80529	0.199185	0.321165	0.00806	0.605438	0.108515	0.00358		1785.83	34.8525	1795.41	39.328	1774.64	60.2088	101.171
J08CCQ11 014	2009-06-18		418.537	0.223736	0.156967		4.39136	0.235461	0.304877	0.01519	0.92921	0.104466	0.00207		1710.72	44.3738	1715.45	75.0457	1704.93	36.4796	100.617
J08CCQ11 015	2009-06-18		286.176	0.370507	0.29888		4.54582	0.0946514	0.313451	0.00544	0.833515	0.105182	0.00121		1739.4	17.3314	1757.67	26.6997	1717.5	21.1451	102.339
J08CCQ11 016	2009-06-18		104.304	0.757326	0.594665		4.45254	0.105887	0.307653	0.00587	0.802311	0.104965	0.00149		1722.17	19.721	1729.15	28.9379	1713.71	26.1044	100.901
J08CCQ11 020	2009-06-18		271.931	0.354806	0.270369		4.67217	0.121967	0.317669	0.00548	0.660815	0.10667	0.00209		1762.27	21.8369	1778.34	26.8099	1743.28	35.8977	102.011
J08CCQ11 021	2009-06-18		435.891	0.384235	0.303511		5.03473	0.0971937	0.321626	0.00545	0.877774	0.113533	0.00105		1825.18	16.3549	1797.67	26.5833	1856.72	16.7099	96.8193
J08CCQ11 022	2009-06-18		253.862	0.642523	0.613068		4.51817	0.3614	0.307617	0.02246	0.912796	0.106525	0.00348		1734.32	66.5956	1728.97	110.736	1740.78	59.8722	99.3212
J08CCQ11 023	2009-06-18		301.452	0.209888	0.179929		4.14939	0.173177	0.278199	0.01103	0.94998	0.108175	0.00141		1664.09	34.1608	1582.28	55.6296	1768.91	23.805	89.4499
J08CCQ11 024	2009-06-18		315.641	0.509233	0.372798		4.60546	0.246413	0.311903	0.01456	0.87247	0.107091	0.0028		1750.26	44.6646	1750.06	71.5477	1750.49	47.8605	99.9758
J08CCQ11 025	2009-06-18		118.663	0.476016	0.360321		4.53022	0.0826268	0.313828	0.00386	0.674364	0.104695	0.00141		1736.54	15.1719	1759.52	18.9395	1708.97	24.7813	102.958
J08CCQ11 026	2009-06-18		222.638	0.337621	0.264018		4.86085	0.134115	0.32293	0.00795	0.892264	0.10917	0.00136		1795.5	23.2393	1804.02	38.7395	1785.61	22.7047	101.031
J08CCQ11 027	2009-06-18		554.385	0.126559	0.0955368		4.56032	0.154003	0.30996	0.00935	0.893248	0.106706	0.00162		1742.05	28.1301	1740.51	46.0129	1743.89	27.8135	99.8059
J08CCQ11 028	2009-06-18		640.457	0.539349	0.405575		3.66302	0.205919	0.255025	0.01389	0.968862	0.104173	0.00145		1563.35	44.8686	1464.34	71.3487	1699.76	25.6419	86.1494
J08CCQ11 029	2009-06-18		211.297	0.324141	0.254991		4.48965	0.0977087	0.309751	0.00509	0.755064	0.105123	0.0015		1729.06	18.0744	1739.48	25.0524	1716.47	26.231	101.341
J08CCQ11 033	2009-06-18		86.8888	0.623577	0.469163		4.26902	0.148701	0.294716	0.00912	0.888389	0.105056	0.00168		1687.41	28.6636	1665.05	45.4094	1715.3	29.4017	97.0707
J08CCQ11 034	2009-06-18		272.945	0.982004	0.754924		5.20873	0.181694	0.32726	0.01011	0.885625	0.115435	0.00187		1854.05	29.723	1825.08	49.1046	1886.69	29.1637	96.7348
J08CCQ11 035	2009-06-18		147.661	0.588836	0.465907		4.44334	0.149376	0.306356	0.00863	0.837939	0.105192	0.00193		1720.46	27.8711	1722.75	42.5867	1717.67	33.7235	100.296
J08CCQ11 036	2009-06-18		108.482	0.604496	0.467427		4.33974	0.191277	0.298836	0.01117	0.84805	0.105324	0.00246		1700.95	36.388	1685.54	55.4406	1719.99	42.9176	97.997
J08CCQ11 037	2009-06-18		249.664	0.358122	0.261227		4.28309	0.099933	0.293748	0.00531	0.774761	0.10575	0.00156		1690.12	19.2089	1660.23	26.4585	1727.39	27.0813	96.112
J08CCQ11 038	2009-06-18		230.738	0.402201	0.316694		10.4941	0.45998	0.479846	0.01988	0.945195	0.158614	0.00227		2479.4	40.6561	2526.59	86.6053	2440.94	24.2338	103.509
J08CCQ11 039	2009-06-18		149.576	0.668001	0.525339		4.54747	0.126974	0.311742	0.00621	0.713427	0.105797	0.00207		1739.7	23.2449	1749.27	30.5186	1728.21	35.9152	101.219
J08CCQ11 040	2009-06-18		411.521	0.488259	0.367146		3.79048	0.21435	0.26338	0.01404	0.94266	0.104379	0.00197		1590.73	45.4637	1507.11	71.6423	1703.39	34.7531	88.477
J08CCQ11 041	2009-06-18		65.2292	0.535582	0.410167		4.42539	0.138335	0.30617	0.00664	0.693784	0.104831	0.00236		1717.1	25.8956	1721.83	32.771	1711.34	41.412	100.613
J08CCQ11 042	2009-06-18		304.765	0.839414	0.662367		4.40711	0.119919	0.304511	0.00648	0.782053	0.104966	0.00178		1713.68	22.5229	1713.64	32.022	1713.72	31.1848	99.9954
J08CCQ11 046	2009-06-18		205.604	0.638955	0.451042		5.29745	0.201844	0.339812	0.01142	0.882018	0.113065	0.00203		1868.45	32.556	1885.76	54.9479	1849.25	32.469	101.975
J08CCQ11 047	2009-06-18		113.087	0.491919	0.377545		4.4172	0.110092	0.304774	0.00532	0.700368	0.105116	0.00187		1715.57	20.6381	1714.94	26.2843	1716.34	32.7041	99.9181
J08CCQ11 048	2009-06-18		80.6784	0.516121	0.418947		4.7284	0.176008	0.318644	0.00796	0.671103	0.107624	0.00297		1772.29	31.208	1783.1	38.9143	1759.57	50.4579	101.338
J08CCQ11 049	2009-06-18		162.383	0.260691	0.234934		4.3856	0.205085	0.294412	0.01242	0.902113	0.108037	0.00218		1709.63	38.6847	1663.54	61.8558	1766.57	36.8627	94.1678
J08CCQ11 050	2009-06-18		575.84	0.486025	0.41116		4.42874	0.117598	0.299122	0.00616	0.775555	0.107382	0.0018		1717.73	21.9988	1686.95	30.567	1755.45	30.6651	96.0979
J08CCQ11 051	2009-06-18		124.198	0.36042	0.296603		4.28919	0.14567	0.295245	0.00932	0.929476	0.105364	0.00132		1691.29	27.9718	1667.69	46.3863	1720.67	23.0184	96.9207
J08CCQ11 052	2009-06-18		195.388	0.505486	0.429649		4.45587	0.109671	0.3056	0.00591	0.785731	0.105749	0.00161		1722.79	20.4135	1719.02	29.1809	1727.38	27.9495	99.5158
J08CCQ11 053	2009-06-18		400.382	0.23998	0.192638		4.85874	0.182112	0.32261	0.00946	0.782345	0.109231	0.00255		1795.13	31.5722	1802.46	46.1089	1786.62	42.5423	100.887
J08CCQ11 054	2009-06-18		324.62	0.120702	0.198919		4.69243	0.130179	0.316815	0.00756	0.860147	0.107421	0.00152		1765.89	23.2246	1774.16	37.0101	1756.13	25.8832	101.027
J08CCQ11 055	2009-06-18		222.883	0.593708	0.454726		4.3689	0.109669	0.302815	0.00626	0.823539	0.104639	0.00149		1706.48	20.7438	1705.25	30.9751	1707.98	26.2048	99.8407
J08CCQ11 059	2009-06-18		109.342	0.50922	0.388717		4.66146	0.163408	0.315101	0.0082	0.742356	0.107293	0.00252		1760.35	29.3154	1765.76	40.1956	1753.94	42.9748	100.674
J08CCQ11 060	2009-06-18		482.555	0.332521	0.257822		4.68198	0.100836	0.316978	0.00566	0.829087	0.107127	0.00129		1764.03	18.0215	1774.96	27.705	1751.11	22.0408	101.362
J08CCQ11 061	2009-06-18		281.627	0.162792	0.106919		4.37536	0.113251	0.300673	0.0057	0.732403	0.10554	0.00186		1707.7	21.3959	1694.64	28.2506	1723.75	32.3683	98.3118
J08CCQ11 062	2009-06-18		297.989	0.986721	0.774089		4.40258	0.462579	0.294437	0.03066	0.991063	0.108446	0.00152		1712.83	87.1525	1663.66	152.718	1773.48	25.5835	93.808
J08CCQ11 063	2009-06-18		216.824	0.178878	0.154605		3.75736	0.139453	0.262138	0.00801	0.823299	0.103956	0.00219		1583.69	29.7725	1500.77	40.9119	1695.92	38.8277	88.4929
J08CCQ11 064	2009-06-18		316.56	0.51368	0.439227		4.08956	0.0874591	0.284306	0.00498	0.819059	0.104325	0.00128		1652.22	17.4501	1613.01	24.9966	1702.45	22.5949	94.7463
J08CCQ11 065	2009-06-18		260.347	0.366147	0.277485		10.5992	0.225009	0.470631	0.00874	0.874793	0.16334	0.00168		2488.64	19.6995	2486.33	38.3117	2490.53	17.3296	99.8313
J08CCQ11 066	2009-06-18		131.099	0.66318	0.519228		4.36971	0.10176	0.30129	0.00624	0.889354	0.105188	0.00112		1706.63	19.2446	1697.7	30.9124	1717.61	19.5709	98.8409
J08CCQ11 067	2009-06-18		207.292	0.653751	0.510847		5.04418	0.13295	0.328446	0.0072	0.831706	0.111385	0.00163		1826.77	22.3384	1830.84	34.9391	1822.13	26.5518	100.478
J08CCQ11 068	2009-06-18		194.551	0.478506	0.351821		5.45032	0.185998	0.349668	0.01003	0.840542	0.113048	0.00209		1892.81	29.2871	1933.01	47.9071	1848.99	33.4345	104.544
J08CCQ11 072	2009-06-18		131.567	0.887725	0.73419		5.12816	0.20342	0.325805	0.01142	0.88364	0.114157	0.00212		1840.78	33.7174	1818.02	55.5284	1866.62	33.5136	97.3965
J08CCQ11 073	2009-06-18		250.531	0.202667	0.162396		4.6696	0.112009	0.315294	0.00617	0.815826	0.107414	0.00149		1761.81	20.0625	1766.71	30.2401	1756.01	25.3744	100.609
J08CCQ11 074	2009-06-18		259.254	0.27614	0.217167		4.7462	0.0699179	0.316905	0.00386	0.826831	0.108622	0.0009		1775.44	12.3555	1774.59	18.8952	1776.43	15.1181	99.8967
J08CCQ11 075	2009-06-18		218.256	0.450271	0.339786		4.44859	0.0951505	0.306814	0.00489	0.745153	0.105159	0.0015		1721.44	17.7338	1725.01	24.1221	1717.1	26.22	100.461
J08CCQ11 076	2009-06-18		188.886	0.716117	0.567016		4.33623	0.111031	0.29891	0.00577	0.753883	0.105213	0.00177		1700.28	21.1301	1685.9	28.6364	1718.05	30.9199	98.1289
J08CCQ11 077	2009-06-18		179.622	0.468543	0.350604		4.92857	0.188078	0.333297	0.01168	0.918323	0.107248	0.00162		1807.16	32.2228	1854.34	56.4736	1753.17	27.6409	105.771
J08CCQ11 078	2009-06-18		212.221	0.260569	0.205688		4.72682	0.107421	0.31714	0.00657	0.911575	0.108098	0.00101		1772.01	19.0484	1775.75	32.1555	1767.6	17.0668	100.461
J08CCQ11 079	2009-06-18		480.857	0.654805	0.494022		10.3631	1.14821	0.441559	0.04837	0.988677	0.170215	0.00283		2467.75	102.953	2357.61	216.384	2559.76	27.8218	92.1029
J08CCQ11 080	2009-06-18		289.245	0.528433	0.395916		4.54776	0.105326	0.314047	0.00601	0.826305	0.105027	0.00137		1739.75	19.2797	1760.59	29.4839	1714.79	23.9846	102.671
J08CCQ11 081	2009-06-18		102.184	0.258588	0.20457		4.8028	0.231838	0.318087	0.01404	0.91439	0.109508	0.00214		1785.39	40.5889	1780.38	68.6685	1791.25	35.5913	99.3932
J08CCQ11 085	2009-06-18		189.033	0.500474	0.395916		4.66899	0.121394	0.310735	0.0068	0.841673	0.108976	0.00153		1761.7	21.7465	1744.32	33.4438	1782.37	25.5984	97.8652
J08CCQ11 086	2009-06-18		239.32	0.17512	0.1616		4.47125	0.24848	0.300436	0.01542	0.923569	0.107938	0.0023		1725.65	46.146	1693.47	76.4423	1764.9	38.9354	95.9525
J08CCQ11 087	2009-06-18		321.958	0.523617	0.458126		4.87297	0.245254	0.346017	0.01318	0.756827	0.10214	0.00336		1797.59	42.4268	1915.55	63.1244	1663.37	60.8823	115.161
J08CCQ11 088	2009-06-18		636.996	0.148738	0.10413		10.0053	0.372423	0.454802	0.01638	0.967579	0.159554	0.0015		2435.27	34.3739	2416.57	72.585	2450.94	15.9031	98.5976
J08CCQ11 089	2009-06-18		323.672	0.450516	0.192883		4.05617	0.29275	0.283596	0.01644	0.803195	0.103732	0.00446		1645.54	58.856	1609.45	82.5687	1691.95	79.2843	95.1239
J08CCQ11 090	2009-06-18		235.012	0.204646	0.164696		4.7506	0.147571	0.317731	0.00815	0.825744	0.108439	0.0019		1776.21	26.0623	1778.64	39.8708	1773.36	31.9818	100.298
J08CCQ11 091	2009-06-18		382.233	0.500886	0.38524		4.3071	0.111074	0.290579	0.00653	0.871407	0.107503	0.00136		1694.72	21.2544	1644.42	32.6175	1757.51	23.1372	93.5655
J08CCQ11 092	2009-06-18		82.8624	0.914262	0.702512		16.7618	0.462013	0.572305	0.0142	0.900176	0.212418	0.00255		2921.31	26.4177	2917.28	58.2213	2924.09	19.4236	99.7671
J08CCQ11 093	2009-06-18		432.304	0.0586109	0.0570519		4.49769	0.131946	0.309451	0.00632	0.696173	0.105414	0.00222		1730.55	24.3742	1738	31.1135	1721.54	38.6902	100.956
J08CCQ11 094	2009-06-18		282.072	0.659017	0.490876		4.37775	0.153809	0.304682	0.007	0.653915	0.104208	0.00277		1708.15	29.0488	1714.49	34.5872	1700.39	48.9644	100.829
J08CCQ11 098	2009-06-18		144.644	0.381623	0.297191		4.44055	0.100224	0.304861	0.00544	0.790605	0.105641	0.00146		1719.94	18.7072	1715.37	26.8754	1725.5	25.3775	99.4128
J08CCQ11 099	2009-06-18		221.427	1.61801	1.25959		11.4892	0.177692	0.492724	0.00683	0.896273	0.169116	0.00116		2563.71	14.4474	2582.45	29.4959	2548.92	11.4903	101.316
J08CCQ11 100	2009-06-18		157.773	0.36053	0.242078		4.79301	0.166044	0.319092	0.01023	0.925435	0.108941	0.00143		1783.67	29.1117	1785.29	49.9951	1781.78	23.9347	100.197
J08CCQ11 101	2009-06-18		242.757	0.303838	0.231821		5.11673	0.113576	0.329217	0.00569	0.778637	0.112722	0.00157		1838.89	18.8559	1834.59	27.5954	1843.76	25.2046	99.5027
J08CCQ11 102	2009-06-18		151.289	0.571194	0.466147		4.94936	0.122968	0.318792	0.00545	0.68809	0.1126	0.00203		1810.72	20.9901	1783.83	26.6404	1841.8	32.6323	96.8522
J08CCQ11 103	2009-06-18		137.863	0.302779	0.226107		4.97606	0.263401	0.325794	0.01388	0.804849	0.110775	0.00348		1815.26	44.7831	1817.96	67.4913	1812.17	57.0688	100.32
J08CCQ11 104	2009-06-18		306.155	6.18397	0.169955		5.10419	0.285717	0.330717	0.01555	0.839974	0.111936	0.0034		1836.8	47.5614	1841.85	75.3326	1831.09	55.0512	100.588
J08CCQ11 105	2009-06-18		294.392	0.271861	0.208549		4.70289	0.160108	0.317018	0.00956	0.885778	0.107592	0.0017		1767.76	28.5143	1775.15	46.7942	1759.03	28.892	100.916
J08CCQ11 106	2009-06-18		127.072	0.603738	0.464334		4.36114	0.108552	0.302076	0.00589	0.783355	0.104709	0.00162		1705.01	20.5623	1701.6	29.1608	1709.2	28.4677	99.555
J08CCQ11 107	2009-06-18		144.749	1.05916	0.813003		4.74063	0.159229	0.316454	0.00766	0.720664	0.108648	0.00253		1774.45	28.1711	1772.39	37.5099	1776.88	42.4859	99.7474
J08CCQ11 111	2009-06-18		308.066	0.407695	0.292591		4.36265	0.299043	0.305214	0.01995	0.953576	0.103668	0.00214		1705.29	56.6806	1717.11	98.5401	1690.8	38.0714	101.556
J08CCQ11 112	2009-06-18		154.032	0.515905	0.384907		4.77713	0.111235	0.316857	0.00544	0.737326	0.109346	0.00172		1780.89	19.5531	1774.36	26.6306	1788.54	28.6581	99.207
J08CCQ11 113	2009-06-18		158.862	0.707143	0.548413		8.61963	0.314179	0.429442	0.01166	0.744912	0.145574	0.00354		2298.63	33.1744	2303.2	52.5848	2294.57	41.8078	100.376
J08CCQ11 114	2009-06-18		261.196	0.289742	0.201844		4.70349	0.135276	0.315951	0.0065	0.715307	0.107969	0.00217		1767.86	24.0875	1769.92	31.8416	1765.43	36.7218	100.255
J08CCQ11 115	2009-06-18		381.953	0.220753	0.18863		4.8402	0.17526	0.321891	0.01005	0.862255	0.109057	0.002		1791.91	30.4801	1798.96	49.0114	1783.72	33.4317	100.854
J08CCQ11 116	2009-06-18		209.371	0.262223	0.209459		4.12182	0.185162	0.285099	0.01244	0.971321	0.104856	0.00112		1658.64	36.7237	1616.99	62.4044	1711.79	19.6473	94.4623
J08CCQ11 117	2009-06-18		281.405	0.479541	0.385558		3.87984	0.131357	0.267652	0.00812	0.896081	0.105134	0.00158		1609.5	27.3389	1528.87	41.2934	1716.66	27.6265	89.0611
J08CCQ11 118	2009-06-18		269.86	0.239803	0.189586		4.36993	0.132358	0.302066	0.00754	0.824128	0.104923	0.0018		1706.67	25.0322	1701.54	37.3303	1712.97	31.5511	99.333
J08CCQ11 119	2009-06-18		72.5807	0.637079	0.480628		6.43904	0.162259	0.36828	0.00616	0.663765	0.126807	0.00239		2037.61	22.1509	2021.3	29.022	2054.16	33.2727	98.4002
J08CCQ11 120	2009-06-18		109.791	0.41177	0.318167		4.20846	0.135344	0.290944	0.00707	0.755601	0.104909	0.00221		1675.67	26.3912	1646.24	35.3049	1712.72	38.7442	96.1188
J08CCQ11 124	2009-06-18		243.443	0.472833	0.345476		4.55526	0.177679	0.306258	0.01115	0.93339	0.107876	0.00151		1741.12	32.4871	1722.27	55.0268	1763.85	25.5801	97.6427
J08CCQ11 125	2009-06-18		302.228	0.185224	0.180637		2.80794	0.408888	0.188644	0.02724	0.991627	0.107956	0.00203		1357.66	109.452	1114.02	147.758	1765.2	34.358	63.1105
J08CCQ11 126	2009-06-18		154.881	0.389214	0.300332		4.2596	0.115404	0.293275	0.00686	0.863372	0.10534	0.00144		1685.59	22.2826	1657.87	34.1944	1720.25	25.118	96.3738
J08CCQ11 127	2009-06-18		96.8381	0.900207	0.720065		4.2372	0.132395	0.295004	0.00697	0.756156	0.104172	0.00213		1681.26	25.6741	1666.49	34.6964	1699.74	37.6677	98.044
J08CCQ11 128	2009-06-18		379.044	0.518205	0.355435		4.62193	0.208248	0.312102	0.01287	0.915222	0.107406	0.00195		1753.24	37.629	1751.04	63.2329	1755.86	33.2115	99.7256
J08CCQ11 129	2009-06-18		436.519	0.458873	0.353974		4.63622	0.185305	0.318041	0.01076	0.84646	0.105725	0.00225		1755.81	33.3953	1780.16	52.6273	1726.96	39.0708	103.08
J08CCQ11 130	2009-06-18		226.65	0.420831	0.322452		4.74196	0.141064	0.316031	0.00881	0.937103	0.108825	0.00113		1774.69	24.9502	1770.32	43.1553	1779.84	18.9382	99.4652
J08CCQ11 131	2009-06-18		224.235	0.459025	0.351285		5.13048	0.17156	0.330931	0.0099	0.894624	0.11244	0.00168		1841.17	28.4226	1842.89	47.9519	1839.22	27.0532	100.2
J08CCQ11 132	2009-06-18		110.662	0.763315	0.585674		4.38405	0.158782	0.302954	0.00924	0.842114	0.104954	0.00205		1709.34	29.9535	1705.94	45.716	1713.51	35.9203	99.5584
J08CCQ11 133	2009-06-18		376.315	0.380088	0.295699		4.35899	0.148056	0.296154	0.0087	0.864894	0.10675	0.00182		1704.6	28.0597	1672.21	43.2701	1744.65	31.2313	95.8476
J08CCQ11 137	2009-06-18		142.981	0.501551	0.378859		4.33937	0.151981	0.298353	0.00731	0.69956	0.105486	0.00264		1700.88	28.9099	1683.14	36.295	1722.8	45.9711	97.6977
J08CCQ11 138	2009-06-18		80.1932	0.309009	0.233099		4.83805	0.150906	0.320801	0.00835	0.834475	0.109379	0.00188		1791.54	26.2522	1793.64	40.7543	1789.09	31.3125	100.254
J08CCQ11 139	2009-06-18		249.082	0.908478	0.692556		11.8689	0.33833	0.492474	0.01287	0.916781	0.174794	0.00199		2594.11	26.7011	2581.37	55.5905	2604.08	18.9695	99.1279
J08CCQ11 140	2009-06-18		504.803	0.260978	0.202147		4.54172	0.0931439	0.310393	0.00464	0.728908	0.106123	0.00149		1738.65	17.0679	1742.64	22.8264	1733.84	25.7545	100.507
J08CCQ11 141	2009-06-18		431.621	0.327036	0.338481		4.60488	0.268634	0.311217	0.01738	0.957292	0.107313	0.00181		1750.15	48.7031	1746.69	85.4513	1754.29	30.8596	99.5672
J08CCQ11 142	2009-06-18		167.057	0.570656	0.438128		4.5993	0.198346	0.308558	0.01202	0.90331	0.108107	0.002		1749.14	35.9833	1733.61	59.2164	1767.76	33.792	98.068
J08CCQ11 143	2009-06-18		394.069	0.222785	0.195949		4.26153	0.200966	0.298522	0.01275	0.905681	0.103535	0.00207		1685.96	38.8019	1683.98	63.2984	1688.44	36.8845	99.7359
J08CCQ11 144	2009-06-18		144.613	0.51727	0.397684		4.49924	0.0859883	0.308435	0.00444	0.753215	0.105797	0.00133		1730.83	15.8782	1733	21.8751	1728.21	23.0759	100.277
J08CCQ11 145	2009-06-18		322.89	0.451282	0.348301		4.2766	0.142058	0.298494	0.00893	0.900636	0.103911	0.0015		1688.87	27.343	1683.84	44.334	1695.12	26.6086	99.3344
J08CCQ11 146	2009-06-18		270.632	0.908979	0.702378		11.5077	0.380006	0.474521	0.01192	0.760708	0.175886	0.00377		2565.2	30.8587	2503.35	52.1138	2614.45	35.6784	95.7506
J08CCQ11 150	2009-06-18		132.495	0.295761	0.227193		4.56846	0.118696	0.306494	0.00682	0.856441	0.108105	0.00145		1743.53	21.6469	1723.43	33.6511	1767.73	24.4997	97.4939
J08CCQ11 151	2009-06-18		222.572	0.371548	0.279352		4.99536	0.163633	0.323055	0.00932	0.880715	0.112148	0.00174		1818.54	27.7201	1804.63	45.4113	1834.51	28.1084	98.3714
J08CCQ11 152	2009-06-18		157.656	0.449264	0.345685		5.06598	0.171675	0.327215	0.0104	0.937903	0.112287	0.00132		1830.43	28.7442	1824.87	50.5149	1836.76	21.2913	99.3528
J08CCQ11 153	2009-06-18		243.206	0.690104	0.534718		4.43295	0.0932653	0.307122	0.00568	0.879045	0.104684	0.00105		1718.52	17.4324	1726.53	28.0126	1708.77	18.4566	101.039
J08CCQ11 154	2009-06-18		179.243	0.515075	0.383777		4.42184	0.127216	0.303721	0.00787	0.900663	0.105591	0.00132		1716.44	23.8289	1709.73	38.9147	1724.63	22.9574	99.1361
Sample J08-CC-Q10: Quartzite, Coal Creek area, Front Range, Colorado (UTM Zone 13, E 469688, N 4412513)
J08CCQ10 163	2009-06-18		504.155	0.954218	0.723953		5.10503	0.173599	0.326403	0.01063	0.957702	0.113434	0.00111		1836.94	28.8806	1820.92	51.6637	1855.14	17.6835	98.1553
J08CCQ10 164	2009-06-18		570.219	0.180412	0.208364		1.03905	0.685971	0.0704662	0.04651	0.999765	0.106944	0.00153		723.446	355.431	438.964	280.263	1747.97	26.1965	25.1127
J08CCQ10 165	2009-06-18		338.684	0.21924	0.164043		4.67846	0.109176	0.312921	0.00623	0.853157	0.108434	0.00132		1763.4	19.5245	1755.07	30.5894	1773.28	22.2202	98.973
J08CCQ10 166	2009-06-18		294.875	0.838958	0.656923		3.47391	0.169697	0.241108	0.01095	0.929709	0.104498	0.00188		1521.31	38.5324	1392.45	56.8767	1705.49	33.1188	81.6453
J08CCQ10 167	2009-06-18		396.815	0.546037	0.427389		5.74826	0.174652	0.329321	0.00887	0.886477	0.126595	0.00178		1938.66	26.285	1835.09	43.0149	2051.21	24.8303	89.4635
J08CCQ10 168	2009-06-18		300.317	0.681301	0.506624		4.65058	0.318132	0.31397	0.01813	0.844129	0.107428	0.00394		1758.4	57.2274	1760.21	88.9525	1756.24	67.0871	100.226
J08CCQ10 169	2009-06-18		453.84	0.365098	0.281894		4.49456	0.0594927	0.303192	0.00326	0.812313	0.107515	0.00083		1729.97	10.9945	1707.12	16.1261	1757.72	14.1185	97.1212
J08CCQ10 170	2009-06-18		449.689	0.396983	0.322792		1.75544	0.313283	0.116089	0.02059	0.993835	0.109671	0.00217		1029.17	115.947	708.013	118.939	1793.96	36.0245	39.4665
J08CCQ10 171	2009-06-18		130.509	0.290327	0.226886		4.3027	0.108459	0.288648	0.00511	0.702306	0.108111	0.00194		1693.88	20.7712	1634.77	25.5627	1767.83	32.7766	92.4731
J08CCQ10 172	2009-06-18		419.325	0.681695	0.465599		4.51934	0.165359	0.311706	0.01008	0.883816	0.105154	0.0018		1734.54	30.4299	1749.1	49.5394	1717.02	31.4656	101.868
J08CCQ10 176	2009-06-18		342.935	0.309227	0.219301		4.70622	0.242581	0.316114	0.01599	0.981345	0.107976	0.00107		1768.35	43.1916	1770.72	78.324	1765.55	18.1056	100.293
J08CCQ10 177	2009-06-18		138.538	0.428284	0.328815		12.5361	0.411853	0.504538	0.01554	0.937512	0.180205	0.00206		2645.44	30.9039	2633.27	66.5858	2654.76	18.955	99.1906
J08CCQ10 178	2009-06-18		211.737	0.334967	0.253497		4.14078	0.131814	0.273927	0.00611	0.700689	0.109634	0.00249		1662.39	26.0411	1560.71	30.9185	1793.34	41.3542	87.0281
J08CCQ10 179	2009-06-18		124.217	0.644237	0.373052		12.51	0.647676	0.49463	0.02477	0.967265	0.183432	0.00241		2643.48	48.7153	2590.67	106.844	2684.15	21.7249	96.5175
J08CCQ10 180	2009-06-18		171.671	0.468285	0.308663		4.12918	0.208961	0.274886	0.01081	0.777091	0.108946	0.00347		1660.1	41.3892	1565.56	54.6617	1781.86	58.0765	87.8609
J08CCQ10 181	2009-06-18		170.117	0.338252	0.264787		4.63665	0.170897	0.308388	0.00976	0.858661	0.109045	0.00206		1755.89	30.7948	1732.77	48.0883	1783.52	34.4392	97.1544
J08CCQ10 182	2009-06-18		147.782	0.331442	0.262922		4.18523	0.188759	0.278718	0.01007	0.801081	0.108907	0.00294		1671.13	36.9796	1584.9	50.7671	1781.21	49.2276	88.9791
J08CCQ10 183	2009-06-18		263.768	0.595369	0.438681		4.63368	0.147353	0.308609	0.00855	0.871213	0.108897	0.0017		1755.36	26.5642	1733.86	42.1193	1781.05	28.4679	97.3502
J08CCQ10 184	2009-06-18		1013.51	0.410913	0.129984		3.79736	0.677038	0.250458	0.04399	0.985116	0.109963	0.00337		1592.19	144.261	1440.84	226.873	1798.79	55.7646	80.1005
J08CCQ10 185	2009-06-18		228.638	0.33558	0.24312		4.51833	0.109518	0.296927	0.00542	0.753081	0.110364	0.00176		1734.35	20.1542	1676.05	26.9404	1805.41	28.9939	92.8351
J08CCQ10 192	2009-06-18		199.806	0.232692	0.152797		4.64091	0.292098	0.31459	0.01912	0.965644	0.106993	0.00175		1756.66	52.6257	1763.26	93.7662	1748.82	29.9463	100.826
J08CCQ10 193	2009-06-18		259.558	0.255165	0.178463		4.62445	0.283524	0.31222	0.01847	0.964884	0.107423	0.00173		1753.69	51.2281	1751.62	90.7417	1756.16	29.4586	99.7419
J08CCQ10 194	2009-06-18		180.427	0.587658	0.442101		4.06849	0.0952909	0.278912	0.00485	0.74243	0.105795	0.00166		1648.01	19.0921	1585.88	24.4468	1728.17	28.8023	91.7667
J08CCQ10 195	2009-06-18		208.745	0.339203	0.272104		4.41027	0.121737	0.296555	0.00685	0.836815	0.10786	0.00163		1714.27	22.851	1674.2	34.0582	1763.57	27.618	94.9325
J08CCQ10 196	2009-06-18		418.892	0.639553	0.398152		11.3625	0.833828	0.49792	0.03486	0.954034	0.165505	0.00364		2553.35	68.59	2604.85	150.05	2512.69	36.9744	103.668
J08CCQ10 197	2009-06-18		424.873	0.235694	0.19581		4.83053	0.254639	0.32536	0.01572	0.916553	0.107678	0.00227		1790.23	44.3735	1815.85	76.464	1760.5	38.5413	103.144
J08CCQ10 198	2009-06-18		112.115	0.289108	0.222333		5.68914	0.13953	0.338984	0.00691	0.831143	0.121721	0.00166		1929.72	21.1832	1881.78	33.2678	1981.6	24.2778	94.9625
J08CCQ10 199	2009-06-18		256.137	0.378701	0.301288		4.86109	0.165431	0.313026	0.00952	0.893663	0.11263	0.00172		1795.54	28.6671	1755.58	46.7401	1842.27	27.6403	95.2942
J08CCQ10 200	2009-06-18		295.659	0.313285	0.269921		4.04605	0.127643	0.271488	0.00741	0.865171	0.108088	0.00171		1643.51	25.6902	1548.35	37.5689	1767.44	28.8983	87.604
J08CCQ10 201	2009-06-18		158.463	0.249716	0.210083		10.7219	0.283837	0.460345	0.0103	0.845194	0.168922	0.00239		2499.32	24.5915	2441.08	45.4681	2546.99	23.7057	95.8418
J08CCQ10 205	2009-06-18		158.97	0.958046	0.724692		15.0346	0.412028	0.535214	0.01255	0.855619	0.203733	0.00289		2817.43	26.0973	2763.38	52.699	2856.34	23.0892	96.7455
J08CCQ10 206	2009-06-18		159.822	0.799936	0.592006		5.19397	0.104821	0.320302	0.00577	0.892619	0.117609	0.00107		1851.63	17.1851	1791.2	28.1724	1920.2	16.3136	93.2821
J08CCQ10 207	2009-06-18		189.44	0.320711	0.236181		4.68824	0.183107	0.313381	0.01131	0.924046	0.108501	0.00162		1765.14	32.697	1757.33	55.5138	1774.41	27.2496	99.0373
J08CCQ10 208	2009-06-18		708.405	0.195511	0.205111		1.90485	0.491058	0.126663	0.03261	0.998688	0.109071	0.00144		1082.79	173.312	768.8	186.636	1783.96	24.0668	43.0951
J08CCQ10 209	2009-06-18		178.683	0.783496	0.498299		4.89291	0.13996	0.323332	0.00794	0.858492	0.109753	0.00161		1801.04	24.1205	1805.98	38.679	1795.32	26.7034	100.594
J08CCQ10 210	2009-06-18		385.99	0.289584	0.22749		4.74958	0.129278	0.316953	0.00733	0.849651	0.108683	0.00156		1776.03	22.8345	1774.83	35.8803	1777.45	26.1868	99.8526
J08CCQ10 211	2009-06-18		200.289	0.407932	0.306358		4.63232	0.139363	0.30776	0.00695	0.750623	0.109165	0.00217		1755.11	25.1293	1729.68	34.2593	1785.53	36.2292	96.8718
J08CCQ10 212	2009-06-18		249.577	0.294497	0.245835		3.51178	0.114165	0.231519	0.00571	0.758654	0.110012	0.00233		1529.87	25.6985	1342.45	29.8893	1799.6	38.5343	74.5974
J08CCQ10 213	2009-06-18		298.431	0.499438	0.354699		4.94089	0.24912	0.318403	0.01488	0.926878	0.112545	0.00213		1809.27	42.6031	1781.93	72.7598	1840.91	34.2603	96.7958
J08CCQ10 214	2009-06-18		26.4659	0.657026	0.237002		4.98614	0.540286	0.296692	0.00594	0.184766	0.121887	0.01298		1816.97	91.8946	1674.88	29.5305	1984.03	189.522	84.418
J08CCQ10 218	2009-06-18		228.741	0.373956	0.259919		4.75934	0.11355	0.315756	0.00608	0.807071	0.109319	0.00154		1777.76	20.0217	1768.97	29.7886	1788.09	25.6669	98.9307
J08CCQ10 219	2009-06-18		186.886	0.692967	0.530379		10.668	0.265518	0.463174	0.00879	0.762492	0.167047	0.00269		2494.65	23.1101	2453.56	38.7272	2528.27	27.0305	97.0447
J08CCQ10 220	2009-06-18		193.008	0.51611	0.389044		4.47735	0.136857	0.301857	0.00757	0.820441	0.107577	0.00188		1726.78	25.3757	1700.51	37.4848	1758.77	31.9567	96.6874
J08CCQ10 221	2009-06-18		387.225	0.115316	0.0862541		4.44675	0.112714	0.298287	0.00645	0.853077	0.10812	0.00143		1721.09	21.0152	1682.81	32.0266	1767.98	24.1577	95.1826
J08CCQ10 222	2009-06-18		176.653	0.450336	0.339889		4.26339	0.151253	0.292433	0.00854	0.823158	0.105737	0.00213		1686.32	29.1868	1653.68	42.5965	1727.17	36.982	95.745
J08CCQ10 223	2009-06-18		133.823	0.494485	0.366346		10.5226	0.342184	0.468132	0.0135	0.886806	0.163025	0.00245		2481.91	30.1625	2475.36	59.2788	2487.28	25.3293	99.5211
J08CCQ10 224	2009-06-18		198.498	0.502516	0.314833		4.83334	0.328351	0.320883	0.02124	0.974354	0.109244	0.00167		1790.72	57.2151	1794.04	103.668	1786.85	27.8567	100.402
J08CCQ10 225	2009-06-18		133.178	0.685004	0.49945		5.01325	0.224364	0.315912	0.01343	0.949897	0.115094	0.00161		1821.56	37.9032	1769.73	65.7934	1881.36	25.1994	94.0669
J08CCQ10 226	2009-06-18		347.442	0.193572	0.164238		2.44118	0.71454	0.160485	0.04684	0.997141	0.110323	0.00244		1254.82	213.949	959.47	260.334	1804.73	40.2144	53.1641
J08CCQ10 231	2009-06-18		207.419	0.217335	0.1633		4.42787	0.0756666	0.296394	0.00381	0.752222	0.108349	0.00122		1717.57	14.1558	1673.4	18.9456	1771.84	20.5568	94.4445
J08CCQ10 232	2009-06-18		181.548	0.302498	0.220276		4.74391	0.265577	0.315825	0.01698	0.960365	0.10894	0.0017		1775.03	46.9811	1769.31	83.1921	1781.77	28.4541	99.3005
J08CCQ10 233	2009-06-18		38.7941	0.494677	0.363388		4.86917	0.166788	0.312105	0.00703	0.657574	0.11315	0.00292		1796.94	28.8626	1751.06	34.5389	1850.61	46.6614	94.6208
J08CCQ10 234	2009-06-18		184.613	0.144929	0.115819		4.86159	0.125327	0.310624	0.00674	0.841702	0.113512	0.00158		1795.62	21.7133	1743.78	33.1516	1856.39	25.15	93.9338
J08CCQ10 235	2009-06-18		206.774	0.248217	0.190069		4.56189	0.129375	0.304964	0.0073	0.844047	0.108491	0.00165		1742.33	23.6231	1715.88	36.0618	1774.23	27.7574	96.711
J08CCQ10 236	2009-06-18		61.3785	2.02791	1.48554		5.23667	0.277648	0.332848	0.01273	0.721345	0.114106	0.00419		1858.6	45.2333	1852.17	61.5714	1865.81	66.2729	99.2691
J08CCQ10 237	2009-06-18		492.662	0.598664	0.461617		26.1838	0.693169	0.645928	0.01409	0.823985	0.293999	0.00441		3353.42	25.8972	3212.28	55.186	3438.89	23.2882	93.4103
J08CCQ10 238	2009-06-18		331.695	0.928394	0.646654		5.19162	0.162432	0.329822	0.00953	0.923517	0.114162	0.00137		1851.24	26.6438	1837.52	46.1982	1866.7	21.6562	98.4369
J08CCQ10 239	2009-06-18		159.302	1.47324	1.08602		15.5524	0.268877	0.548165	0.00763	0.805115	0.205772	0.00211		2849.71	16.4953	2817.54	31.7709	2872.53	16.6665	98.0854
J08CCQ10 240	2009-06-18		292.352	0.568367	0.434974		4.54347	0.118497	0.304184	0.00582	0.733614	0.10833	0.00192		1738.97	21.7081	1712.02	28.7677	1771.53	32.3583	96.641
J08CCQ10 244	2009-06-18		134.674	0.272398	0.202444		4.46415	0.0960746	0.300354	0.00509	0.787433	0.107796	0.00143		1724.33	17.855	1693.07	25.2334	1762.5	24.2468	96.0607
J08CCQ10 245	2009-06-18		143.026	0.909557	0.686655		4.46899	0.133213	0.298513	0.00706	0.793422	0.108579	0.00197		1725.23	24.7375	1683.93	35.0494	1775.71	33.1079	94.8313
J08CCQ10 246	2009-06-18		213.283	0.315764	0.242561		4.44037	0.157638	0.2998	0.00926	0.87004	0.10742	0.00188		1719.9	29.4295	1690.32	45.9262	1756.11	32.0138	96.2533
J08CCQ10 247	2009-06-18		277.11	0.245685	0.188372		4.2423	0.115939	0.281526	0.00602	0.782435	0.10929	0.00186		1682.25	22.46	1599.04	30.2824	1787.62	31.0101	89.451
J08CCQ10 248	2009-06-18		177.051	0.303097	0.17827		4.74468	0.213188	0.316101	0.0127	0.894173	0.108863	0.00219		1775.17	37.6987	1770.66	62.208	1780.47	36.6876	99.4489
J08CCQ10 249	2009-06-18		120.112	0.438192	0.292141		4.68781	0.163682	0.311714	0.00826	0.758914	0.109072	0.00248		1765.07	29.2285	1749.14	40.5943	1783.97	41.4483	98.0474
J08CCQ10 250	2009-06-18		147.271	0.492106	0.36377		4.15533	0.191915	0.281206	0.01127	0.867753	0.107171	0.00246		1665.26	37.8166	1597.44	56.7067	1751.87	42.01	91.1848
J08CCQ10 251	2009-06-18		128.705	0.643946	0.439746		5.07576	0.265072	0.322362	0.01068	0.634403	0.114198	0.00461		1832.06	44.3271	1801.25	52.0653	1867.26	72.8447	96.465
J08CCQ10 252	2009-06-18		393.153	0.327683	0.198717		3.93978	0.408504	0.267573	0.02656	0.957329	0.10679	0.0032		1621.89	84.1612	1528.47	135.094	1745.33	54.8873	87.5748
J08CCQ10 253	2009-06-18		1085.57	0.385016	0.229036		3.80931	0.868148	0.256494	0.05809	0.993751	0.107713	0.00274		1594.71	185.321	1471.88	298.242	1761.09	46.5029	83.5778
J08CCQ10 257	2009-06-18		253.277	0.618033	0.432709		5.29291	0.594577	0.313888	0.03497	0.99176	0.122298	0.00176		1867.72	96.2241	1759.81	171.616	1990.01	25.5939	88.4323
J08CCQ10 258	2009-06-18		84.7833	0.74515	0.556319		12.2385	0.434442	0.487773	0.01522	0.879011	0.181974	0.00308		2622.87	33.3333	2561.03	65.9495	2670.95	28.0219	95.8848
J08CCQ10 259	2009-06-18		526.756	0.106119	0.159618		1.38573	0.388034	0.0922264	0.02575	0.997081	0.108974	0.00233		882.879	166.63	568.691	152.007	1782.33	38.9843	31.9072
J08CCQ10 260	2009-06-18		211.397	0.382477	0.29513		4.49749	0.103327	0.299913	0.00515	0.747428	0.108761	0.00166		1730.51	19.0866	1690.88	25.5396	1778.77	27.8407	95.0589
J08CCQ10 261	2009-06-18		323.341	0.236786	0.163165		4.63297	0.265529	0.311157	0.01725	0.967291	0.107989	0.00157		1755.23	47.899	1746.4	84.816	1765.76	26.5624	98.9034
J08CCQ10 262	2009-06-18		181.108	0.345386	0.255525		4.63811	0.138363	0.309713	0.00783	0.847468	0.108613	0.00172		1756.15	24.9232	1739.29	38.5398	1776.28	28.8953	97.9179
J08CCQ10 263	2009-06-18		59.9142	0.738644	0.569849		5.08352	0.15619	0.323258	0.00729	0.733987	0.114055	0.00238		1833.36	26.075	1805.62	35.5145	1865	37.6648	96.8162
J08CCQ10 264	2009-06-18		114.788	0.603795	0.440487		4.15707	0.125199	0.28598	0.00762	0.884722	0.105427	0.00148		1665.6	24.6554	1621.41	38.1983	1721.77	25.7895	94.171
J08CCQ10 265	2009-06-18		250.454	0.361728	0.277038		4.65102	0.101386	0.311507	0.00561	0.826161	0.108288	0.00133		1758.48	18.2191	1748.12	27.5748	1770.81	22.4258	98.7189
J08CCQ10 266	2009-06-18		67.9059	2.01594	1.53273		5.26215	0.205032	0.310543	0.00939	0.776042	0.122897	0.00302		1862.74	33.257	1743.38	46.1891	1998.7	43.6587	87.2258
J08CCQ10 270	2009-06-18		567.521	0.36898	0.273207		4.70075	0.100842	0.316564	0.00573	0.843763	0.107697	0.00124		1767.37	17.9632	1772.93	28.0565	1760.82	21.0489	100.688
J08CCQ10 271	2009-06-18		225.411	0.566718	0.445807		5.29142	0.135221	0.333572	0.00766	0.8986	0.115049	0.00129		1867.48	21.8269	1855.67	37.0284	1880.65	20.2005	98.672
J08CCQ10 272	2009-06-18		222.22	0.162104	0.119957		4.99956	0.143569	0.318141	0.00842	0.921647	0.113975	0.00127		1819.25	24.3026	1780.65	41.1788	1863.74	20.1155	95.5415
J08CCQ10 273	2009-06-18		477.537	0.545137	0.397612		4.8433	0.129003	0.32199	0.00795	0.926976	0.109093	0.00109		1792.45	22.4202	1799.44	38.767	1784.33	18.2128	100.847
J08CCQ10 274	2009-06-18		266.759	0.290668	0.212815		4.75545	0.0945709	0.318626	0.00471	0.743316	0.108245	0.00144		1777.07	16.6858	1783.02	23.026	1770.09	24.2922	100.73
J08CCQ10 275	2009-06-18		61.5044	0.662604	0.486047		14.0243	0.664132	0.542392	0.02316	0.901679	0.187528	0.00384		2751.35	44.9131	2793.45	96.8043	2720.61	33.7443	102.678
J08CCQ10 276	2009-06-18		352.216	0.658648	0.506951		7.32018	0.598298	0.331366	0.02421	0.893903	0.160218	0.00587		2151.28	73.1417	1845	117.237	2457.97	61.9321	75.062
J08CCQ10 277	2009-06-18		150.723	0.580177	0.500375		4.41534	0.134468	0.289906	0.00698	0.790577	0.11046	0.00206		1715.22	25.218	1641.06	34.8835	1806.99	33.8999	90.8172
J08CCQ10 278	2009-06-18		239.246	0.146535	0.149524		1.93342	0.119698	0.122505	0.00726	0.957243	0.114464	0.00205		1092.73	41.4555	744.968	41.6939	1871.47	32.3011	39.8066
J08CCQ10 279	2009-06-18		699.485	0.290377	0.256459		4.2519	0.19528	0.286012	0.0126	0.959203	0.107819	0.0014		1684.1	37.7722	1621.57	63.1623	1762.89	23.7319	91.9836
J08CCQ10 283	2009-06-18		68.2982	0.583289	0.434233		4.58527	0.179014	0.310244	0.0082	0.677	0.107192	0.00308		1746.59	32.5553	1741.91	40.3446	1752.21	52.5858	99.412
J08CCQ10 284	2009-06-18		517.901	0.350675	0.202834		1.8268	0.208566	0.117001	0.01263	0.945496	0.11324	0.00421		1055.13	75.0531	713.281	72.8931	1852.04	67.2103	38.5132
J08CCQ10 285	2009-06-18		130.711	0.405057	0.307706		5.09537	0.142505	0.322239	0.00724	0.803354	0.114682	0.00191		1835.34	23.7432	1800.65	35.2981	1874.9	30.0255	96.0399
J08CCQ10 286	2009-06-18		273.927	0.317762	0.229853		4.58437	0.228237	0.305954	0.01399	0.918451	0.108673	0.00214		1746.43	41.5225	1720.76	69.0597	1777.29	35.9267	96.8194
J08CCQ10 287	2009-06-18		155.674	0.45362	0.319581		10.6898	0.38472	0.474831	0.01364	0.79818	0.163279	0.00354		2496.54	33.4291	2504.71	59.6215	2489.9	36.5318	100.595
J08CCQ10 288	2009-06-18		829.498	0.251271	0.171603		3.38691	0.333039	0.224615	0.02196	0.994265	0.109361	0.00115		1501.37	77.233	1306.21	115.611	1788.8	19.1577	73.0217
J08CCQ10 289	2009-06-18		239.277	0.595687	0.449753		3.28471	0.23132	0.230916	0.01443	0.887352	0.103167	0.00335		1477.44	54.8711	1339.3	75.5746	1681.87	59.9551	79.6317
J08CCQ10 290	2009-06-18		558.175	0.415883	0.355136		3.39108	0.361373	0.21446	0.02274	0.995005	0.114681	0.00122		1502.33	83.7527	1252.54	120.719	1874.87	19.179	66.8065
J08CCQ10 291	2009-06-18		324.949	0.47599	0.358294		4.5368	0.138721	0.302858	0.00851	0.918965	0.108645	0.00131		1737.74	25.445	1705.47	42.1072	1776.82	21.9995	95.9842
J08CCQ10 292	2009-06-18		87.7148	0.330142	0.255198		4.88343	0.145305	0.310666	0.00556	0.601485	0.114007	0.00271		1799.4	25.0824	1743.98	27.3466	1864.24	42.9093	93.5494
J08CCQ10 296	2009-06-18		481.028	0.578964	0.44413		4.45862	0.0748864	0.300783	0.00411	0.813555	0.10751	0.00105		1723.3	13.9308	1695.19	20.3684	1757.63	17.8619	96.4475
J08CCQ10 297	2009-06-18		159.805	0.42889	0.310987		4.43172	0.140239	0.301778	0.00875	0.916276	0.106509	0.00135		1718.29	26.2214	1700.12	43.3307	1740.5	23.2307	97.6797
J08CCQ10 298	2009-06-18		258.911	0.515906	0.486029		2.26842	0.266014	0.151482	0.01706	0.960369	0.108608	0.00355		1202.52	82.8244	909.263	95.5151	1776.2	59.6418	51.1915
J08CCQ10 299	2009-06-18		180.337	0.239738	0.177966		4.63448	0.0727295	0.309383	0.00378	0.77855	0.108643	0.00107		1755.5	13.1072	1737.67	18.6099	1776.79	17.9694	97.7981
J08CCQ10 300	2009-06-18		175.993	0.427362	0.320071		4.04824	0.107411	0.276	0.00612	0.83572	0.106379	0.00155		1643.95	21.6074	1571.19	30.9188	1738.27	26.7122	90.3879
J08CCQ10 301	2009-06-18		433.326	0.314159	0.243148		4.08178	0.26168	0.275011	0.01518	0.860995	0.107646	0.00351		1650.67	52.3322	1566.19	76.7532	1759.95	59.6167	88.9903
J08CCQ10 302	2009-06-18		81.068	0.610739	0.459963		4.34088	0.129301	0.296443	0.00706	0.79954	0.106203	0.0019		1701.16	24.5869	1673.65	35.1054	1735.23	32.8108	96.451
J08CCQ10 303	2009-06-18		492.272	0.336437	0.177186		3.89014	0.318639	0.259275	0.02087	0.982716	0.108819	0.00165		1611.64	66.2556	1486.13	106.846	1779.73	27.6551	83.5032
J08CCQ10 304	2009-06-18		198.035	0.836823	0.566389		12.9693	1.22798	0.51053	0.02869	0.593519	0.184244	0.01404		2677.43	89.4888	2658.89	122.454	2691.45	125.919	98.7902
J08CCQ10 305	2009-06-18		203.542	0.323798	0.24091		4.46067	0.0886015	0.300031	0.00527	0.884309	0.107828	0.001		1723.69	16.4764	1691.46	26.1323	1763.04	16.9496	95.9399
J08CCQ10 309	2009-06-18		379.599	0.273787	0.198073		2.66384	0.154913	0.178397	0.01008	0.971611	0.108298	0.00149		1318.49	42.9578	1058.21	55.1439	1770.98	25.1207	59.7528
J08CCQ10 310	2009-06-18		363.577	0.55867	0.315701		3.97801	0.337944	0.26467	0.02207	0.981564	0.109008	0.00177		1629.72	69.0379	1513.69	112.509	1782.91	29.6031	84.8999
J08CCQ10 311	2009-06-18		210.261	0.180734	0.131674		4.46591	0.103091	0.300488	0.00473	0.681906	0.107791	0.00182		1724.66	19.1531	1693.73	23.4463	1762.41	30.8614	96.1029
J08CCQ10 312	2009-06-18		126.968	0.596397	0.459376		4.37295	0.235336	0.296394	0.00746	0.467688	0.107005	0.00509		1707.24	44.5024	1673.4	37.0958	1749.02	87.0891	95.6765
J08CCQ10 313	2009-06-18		98.7062	0.554039	0.420713		4.57462	0.166615	0.30594	0.00949	0.851671	0.108447	0.00207		1744.66	30.3569	1720.7	46.8456	1773.49	34.8404	97.0233
Sample J08-CC-QBC1: Metaconglomerate, Coal Creek area, Front Range, Colorado (UTM Zone 13, E 467218, N 4411153)
J08CCQBC1 007	2009-06-18		239.681	0.304459	0.223386		4.60253	0.172034	0.317327	0.00997	0.84056	0.105193	0.00213		1749.73	31.1887	1776.66	48.7897	1717.69	37.2175	103.433
J08CCQBC1 008	2009-06-18		233.251	1.04208	0.797047		4.30817	0.113814	0.297381	0.00578	0.735716	0.10507	0.00188		1694.93	21.7745	1678.31	28.7198	1715.54	32.8966	97.8297
J08CCQBC1 009	2009-06-18		335.379	0.453331	0.334306		4.42767	0.136863	0.303787	0.00793	0.844487	0.105707	0.00175		1717.53	25.6092	1710.06	39.2094	1726.65	30.3948	99.0391
J08CCQBC1 010	2009-06-18		225.496	0.480719	0.35722		5.10371	0.116081	0.327587	0.00634	0.850921	0.112995	0.00135		1836.72	19.3129	1826.68	30.7856	1848.13	21.609	98.8393
J08CCQBC1 011	2009-06-18		78.4582	4.51659	3.35053		5.20877	0.181552	0.326744	0.00941	0.826259	0.115618	0.00227		1854.05	29.6995	1822.58	45.7223	1889.54	35.3338	96.4561
J08CCQBC1 012	2009-06-18		91.795	0.650806	0.48923		4.25812	0.135742	0.292268	0.00784	0.841469	0.105666	0.00182		1685.31	26.2187	1652.85	39.1099	1725.93	31.6258	95.7658
J08CCQBC1 013	2009-06-18		136.937	0.671161	0.500901		4.29534	0.11081	0.29302	0.0067	0.886334	0.106316	0.00127		1692.47	21.2509	1656.61	33.4035	1737.19	21.9027	95.3615
J08CCQBC1 014	2009-06-18		188.303	0.593853	0.442178		4.54339	0.129455	0.305157	0.00803	0.923533	0.107983	0.00118		1738.95	23.7166	1716.83	39.6622	1765.66	19.9654	97.2346
J08CCQBC1 015	2009-06-18		512.654	0.165871	0.123495		4.44212	0.110225	0.302196	0.00638	0.85083	0.106611	0.00139		1720.23	20.5684	1702.19	31.5839	1742.26	23.8908	97.7001
J08CCQBC1 016	2009-06-18		130.091	0.846145	0.656889		17.6659	0.521827	0.545414	0.01537	0.954017	0.234913	0.00208		2971.72	28.3937	2806.07	64.1153	3085.83	14.1311	90.9341
J08CCQBC1 020	2009-06-18		99.4941	0.167189	0.13308		4.52795	0.115046	0.302421	0.00624	0.812087	0.10859	0.00161		1736.12	21.1349	1703.3	30.8855	1775.89	27.0545	95.9128
J08CCQBC1 021	2009-06-18		64.5695	0.535028	0.411067		4.49972	0.133148	0.303243	0.00705	0.78569	0.10762	0.00197		1730.92	24.5871	1707.37	34.8728	1759.51	33.47	97.0366
J08CCQBC1 022	2009-06-18		184.248	0.523624	0.397531		4.31975	0.15856	0.294926	0.00966	0.892337	0.106229	0.00176		1697.14	30.2734	1666.1	48.0904	1735.69	30.3838	95.9906
J08CCQBC1 023	2009-06-18		292.115	0.546429	0.420117		4.28091	0.1108	0.296975	0.00706	0.918498	0.104548	0.00107		1689.7	21.3072	1676.29	35.091	1706.37	18.8384	98.2373
J08CCQBC1 024	2009-06-18		236.706	0.39084	0.293584		4.59701	0.171892	0.309376	0.01035	0.89469	0.107768	0.0018		1748.73	31.1937	1737.63	50.9569	1762.01	30.5304	98.6166
J08CCQBC1 025	2009-06-18		1126.84	0.067234	0.0636185		2.64188	0.389195	0.181981	0.02669	0.99556	0.10529	0.00146		1312.38	108.926	1077.79	145.589	1719.38	25.4818	62.6849
J08CCQBC1 026	2009-06-18		100.124	0.735838	0.571758		4.32873	0.136762	0.294099	0.00762	0.820078	0.106749	0.00193		1698.85	26.0656	1661.98	37.9586	1744.64	33.1192	95.2623
J08CCQBC1 027	2009-06-18		237.613	0.29113	0.216748		4.52796	0.109365	0.30377	0.00668	0.910454	0.108108	0.00108		1736.12	20.0909	1709.97	33.0292	1767.77	18.2475	96.7305
J08CCQBC1 028	2009-06-18		378.815	0.721941	0.570808		5.04915	0.137569	0.324707	0.00789	0.891833	0.112778	0.00139		1827.61	23.0957	1812.68	38.3955	1844.66	22.3013	98.2662
J08CCQBC1 029	2009-06-18		132.266	0.37801	0.280643		4.42084	0.124899	0.301126	0.0075	0.881576	0.106477	0.00142		1716.25	23.399	1696.89	37.1591	1739.95	24.4442	97.525
J08CCQBC1 033	2009-06-18		571.329	0.301435	0.218343		4.59602	0.12292	0.309411	0.00703	0.849528	0.107732	0.00152		1748.55	22.3071	1737.81	34.61	1761.41	25.7917	98.6603
J08CCQBC1 034	2009-06-18		471.802	0.481745	0.367209		4.22447	0.128693	0.29171	0.00812	0.913742	0.105032	0.0013		1678.79	25.0167	1650.07	40.5243	1714.87	22.7579	96.2212
J08CCQBC1 035	2009-06-18		102.638	0.401451	0.300235		4.84851	0.141095	0.319732	0.00753	0.809296	0.109982	0.00188		1793.36	24.5007	1788.42	36.7817	1799.1	31.1024	99.4062
J08CCQBC1 036	2009-06-18		337.431	0.347641	0.276127		8.54488	0.263948	0.397737	0.01062	0.864403	0.155815	0.00242		2290.71	28.0859	2158.61	48.9808	2410.74	26.3804	89.5413
J08CCQBC1 037	2009-06-18		23.8656	0.664444	0.518177		4.37102	0.266098	0.30107	0.01322	0.721282	0.105297	0.00444		1706.88	50.3467	1696.61	65.5034	1719.5	77.4863	98.6688
J08CCQBC1 038	2009-06-18		307.495	0.449617	0.334747		4.66913	0.148413	0.313631	0.00847	0.849628	0.107973	0.00181		1761.73	26.588	1758.55	41.5656	1765.5	30.6283	99.6065
J08CCQBC1 039	2009-06-18		175.668	0.375197	0.274018		4.68787	0.139349	0.309968	0.00781	0.847628	0.109688	0.00173		1765.08	24.8812	1740.55	38.4338	1794.23	28.7148	97.0083
J08CCQBC1 040	2009-06-18		24.3924	0.186016	0.172639		4.83079	0.275737	0.317788	0.0103	0.567836	0.11025	0.00518		1790.28	48.053	1778.92	50.387	1803.53	85.442	98.6352
J08CCQBC1 041	2009-06-18		208.84	0.347555	0.255964		4.55909	0.131216	0.303898	0.0076	0.868914	0.108805	0.00155		1741.82	23.9715	1710.61	37.5745	1779.51	25.983	96.1283
J08CCQBC1 042	2009-06-18		41.3255	0.859409	0.658754		11.3387	0.368927	0.478728	0.01165	0.747928	0.17178	0.00371		2551.39	30.369	2521.72	50.7884	2575.06	36.087	97.9286
J08CCQBC1 046	2009-06-18		135.298	1.17841	0.890969		5.54397	0.118495	0.340095	0.00543	0.746997	0.118228	0.00168		1907.44	18.3881	1887.13	26.1207	1929.61	25.4513	97.7984
J08CCQBC1 047	2009-06-18		256.727	0.531448	0.348747		12.5406	1.54131	0.499151	0.03811	0.621206	0.182215	0.01755		2645.78	116.083	2610.15	163.91	2673.14	159.426	97.6436
J08CCQBC1 048	2009-06-18		459.735	0.490842	0.370237		4.35519	0.114422	0.290731	0.0073	0.955718	0.108646	0.00084		1703.88	21.6985	1645.18	36.4594	1776.84	14.1064	92.5906
J08CCQBC1 049	2009-06-18		91.7686	0.547736	0.429711		4.46699	0.173643	0.30379	0.00761	0.644417	0.106645	0.00317		1724.86	32.2616	1710.08	37.627	1742.84	54.4634	98.1199
J08CCQBC1 050	2009-06-18		221.019	0.49139	0.358129		4.62693	0.175495	0.308612	0.01049	0.89617	0.108737	0.00183		1754.14	31.6785	1733.87	51.6764	1778.37	30.7001	97.4979
J08CCQBC1 051	2009-06-18		397.734	0.137417	0.0923729		4.41082	0.171229	0.305596	0.01122	0.945775	0.104682	0.00132		1714.37	32.1431	1719	55.4004	1708.73	23.2033	100.601
J08CCQBC1 052	2009-06-18		119.967	0.427333	0.319854		4.73033	0.135096	0.312812	0.00754	0.843992	0.109675	0.00168		1772.63	23.9426	1754.53	37.0247	1794.02	27.8889	97.799
J08CCQBC1 053	2009-06-18		287.938	0.390279	0.300154		4.68641	0.102378	0.309806	0.00607	0.89688	0.109711	0.00106		1764.82	18.2829	1739.75	29.8747	1794.61	17.5895	96.9429
J08CCQBC1 054	2009-06-18		107.588	0.713765	0.538111		4.40814	0.118815	0.302742	0.00572	0.700983	0.105604	0.00203		1713.87	22.3112	1704.89	28.3047	1724.86	35.3003	98.8423
J08CCQBC1 055	2009-06-18		125.627	0.639602	0.480757		4.20809	0.120159	0.288973	0.0062	0.751385	0.105615	0.00199		1675.6	23.4307	1636.4	31.0077	1725.05	34.6003	94.8607
J08CCQBC1 059	2009-06-18		64.0823	0.774685	0.560855		10.7328	0.473799	0.452822	0.0107	0.535272	0.171903	0.00641		2500.27	41.026	2407.78	47.4786	2576.26	62.2978	93.4605
J08CCQBC1 060	2009-06-18		137.971	0.506498	0.382586		4.607	0.132246	0.306138	0.00779	0.886457	0.109144	0.00145		1750.54	23.9531	1721.67	38.4478	1785.18	24.2142	96.4425
J08CCQBC1 061	2009-06-18		354.018	0.485328	0.358429		4.48015	0.180151	0.307293	0.01154	0.933918	0.10574	0.00152		1727.3	33.3911	1727.37	56.9066	1727.21	26.3901	100.009
J08CCQBC1 062	2009-06-18		52.4725	0.865959	0.629379		12.5365	0.343772	0.499364	0.00885	0.646298	0.182079	0.00381		2645.47	25.7921	2611.06	38.0504	2671.89	34.6405	97.7233
J08CCQBC1 063	2009-06-18		97.4258	0.669581	0.499953		4.43621	0.128654	0.300547	0.00472	0.541526	0.107053	0.00261		1719.13	24.0346	1694.02	23.3957	1749.84	44.6322	96.8101
J08CCQBC1 064	2009-06-18		33.9457	0.561182	0.439138		5.26089	0.327598	0.334182	0.00936	0.449791	0.114176	0.00635		1862.54	53.178	1858.62	45.2258	1866.92	100.362	99.5554
J08CCQBC1 065	2009-06-18		176.016	0.195563	0.148708		4.83772	0.122275	0.313957	0.00681	0.858187	0.111756	0.00145		1791.48	21.2709	1760.15	33.4109	1828.16	23.524	96.2797
J08CCQBC1 066	2009-06-18		85.4838	0.480251	0.365922		4.49816	0.125839	0.303914	0.00649	0.76333	0.107345	0.00194		1730.63	23.2436	1710.69	32.0861	1754.83	33.064	97.4847
J08CCQBC1 067	2009-06-18		164.032	0.866521	0.65076		4.27421	0.14527	0.292433	0.00751	0.7556	0.106005	0.00236		1688.41	27.9743	1653.68	37.4589	1731.82	40.8478	95.4879
J08CCQBC1 068	2009-06-18		54.6088	0.560948	0.411512		4.97198	0.269098	0.325296	0.01379	0.783258	0.110854	0.00373		1814.57	45.7842	1815.54	67.0788	1813.45	61.1156	100.115
J08CCQBC1 072	2009-06-18		203.654	0.543451	0.454866		4.40984	0.242608	0.303912	0.01591	0.951567	0.105238	0.00178		1714.19	45.5662	1710.68	78.6614	1718.48	31.0856	99.5462
J08CCQBC1 073	2009-06-18		337.153	0.448606	0.342316		4.28239	0.163488	0.295402	0.01008	0.893815	0.105141	0.0018		1689.98	31.4358	1668.47	50.1629	1716.78	31.4706	97.1858
J08CCQBC1 074	2009-06-18		152.683	0.687606	0.539361		4.43567	0.148592	0.305975	0.00938	0.915128	0.105141	0.00142		1719.03	27.7638	1720.87	46.3014	1716.79	24.8268	100.238
J08CCQBC1 075	2009-06-18		156.429	0.462979	0.340661		4.47626	0.180326	0.3064	0.01098	0.889548	0.105956	0.00195		1726.58	33.4474	1722.97	54.1819	1730.96	33.7708	99.5385
J08CCQBC1 076	2009-06-18		233.272	0.313957	0.264627		4.70875	0.173928	0.310951	0.00926	0.806225	0.109828	0.0024		1768.8	30.9451	1745.38	45.5355	1796.55	39.7733	97.1518
J08CCQBC1 077	2009-06-18		197.448	0.423117	0.334096		9.90932	0.2347	0.444674	0.00858	0.814659	0.161622	0.00222		2426.38	21.848	2371.53	38.2861	2472.7	23.1845	95.9086
J08CCQBC1 078	2009-06-18		78.1516	0.651968	0.478541		4.48563	0.121409	0.308428	0.00655	0.78462	0.10548	0.00177		1728.32	22.4764	1732.96	32.2711	1722.69	30.8238	100.596
J08CCQBC1 079	2009-06-18		135.744	0.663836	0.499204		10.9888	0.30029	0.467106	0.01096	0.85863	0.170622	0.00239		2522.19	25.4381	2470.86	48.1588	2563.75	23.431	96.3766
J08CCQBC1 080	2009-06-18		133.072	0.30319	0.236157		4.38687	0.14677	0.293502	0.00575	0.585564	0.108403	0.00294		1709.87	27.6719	1659	28.6564	1772.76	49.5078	93.5832
J08CCQBC1 081	2009-06-18		84.8471	0.507748	0.378091		4.31589	0.15787	0.293547	0.00637	0.593243	0.106633	0.00314		1696.4	30.1635	1659.23	31.7453	1742.64	53.9553	95.2134
J08CCQBC1 085	2009-06-18		192.234	0.456327	0.338487		4.38523	0.104126	0.302857	0.00675	0.938644	0.105016	0.00086		1709.56	19.6353	1705.46	33.3987	1714.59	15.058	99.4674
J08CCQBC1 086	2009-06-18		1049.61	0.155553	0.0897774		3.0572	0.0928182	0.208483	0.0041	0.647745	0.106354	0.00246		1422.04	23.2334	1220.73	21.8707	1737.83	42.4073	70.2444
J08CCQBC1 087	2009-06-18		142.141	0.909039	0.658998		4.45502	0.0999445	0.30509	0.00309	0.451461	0.105906	0.00212		1722.63	18.6055	1716.5	15.2629	1730.09	36.7362	99.2142
J08CCQBC1 088	2009-06-18		101.594	0.674152	0.507415		4.23648	0.119337	0.290453	0.00628	0.767567	0.105786	0.00191		1681.12	23.144	1643.79	31.3718	1728.02	33.1433	95.1258
J08CCQBC1 089	2009-06-18		197.843	0.589748	0.435342		4.41182	0.120552	0.304571	0.00736	0.884369	0.105058	0.00134		1714.56	22.6221	1713.94	36.3691	1715.33	23.451	99.919
J08CCQBC1 090	2009-06-18		216.566	0.0998382	0.0764753		4.68179	0.16543	0.313822	0.00936	0.844092	0.1082	0.00205		1763.99	29.572	1759.49	45.9266	1769.32	34.6004	99.4441
J08CCQBC1 091	2009-06-18		183.318	0.822154	0.583176		4.29276	0.153729	0.287169	0.00398	0.387014	0.108417	0.00358		1691.97	29.5002	1627.36	19.9327	1772.99	60.2756	91.7864
J08CCQBC1 092	2009-06-18		165.469	0.380806	0.292427		4.70194	0.197343	0.315778	0.01225	0.924292	0.107993	0.00173		1767.59	35.1563	1769.08	60.0184	1765.82	29.2681	100.184
J08CCQBC1 093	2009-06-18		85.6654	0.293708	0.224735		4.54374	0.137927	0.30454	0.00689	0.745312	0.10821	0.00219		1739.01	25.2677	1713.78	34.0474	1769.5	36.9591	96.8515
J08CCQBC1 094	2009-06-18		233.529	0.441057	0.336962		4.5813	0.143429	0.305844	0.00897	0.936797	0.10864	0.00119		1745.87	26.0992	1720.22	44.2819	1776.73	19.9854	96.8194
J08CCQBC1 098	2009-06-18		131.525	0.591909	0.43544		4.40215	0.161844	0.300567	0.00822	0.743871	0.106224	0.00261		1712.74	30.4292	1694.12	40.7439	1735.59	45.0607	97.6104
J08CCQBC1 099	2009-06-18		381.487	0.429932	0.322334		4.61676	0.0980012	0.308357	0.00497	0.759291	0.108588	0.0015		1752.3	17.7182	1732.62	24.4878	1775.86	25.2064	97.5648
J08CCQBC1 100	2009-06-18		169.226	0.349595	0.271009		4.70659	0.134994	0.314335	0.00585	0.648867	0.108596	0.00237		1768.41	24.0241	1762.01	28.6927	1775.99	39.8228	99.2126
J08CCQBC1 101	2009-06-18		111.852	0.68544	0.4775		4.6277	0.204755	0.307928	0.00916	0.672322	0.108997	0.00357		1754.28	36.9594	1730.5	45.1478	1782.72	59.7155	97.0707
J08CCQBC1 102	2009-06-18		33.1023	0.538515	0.163174		4.59784	0.204735	0.304692	0.01122	0.826975	0.109444	0.00274		1748.88	37.1532	1714.54	55.4388	1790.18	45.603	95.7747
J08CCQBC1 103	2009-06-18		151.043	0.307003	0.241495		4.57637	0.151548	0.307676	0.00782	0.767511	0.107876	0.00229		1744.97	27.6016	1729.26	38.5505	1763.85	38.7935	98.0389
J08CCQBC1 104	2009-06-18		136.392	0.196782	0.147228		4.74143	0.192387	0.315812	0.01147	0.895092	0.108888	0.00197		1774.59	34.0368	1769.25	56.1951	1780.89	32.9928	99.3459
J08CCQBC1 105	2009-06-18		91.2446	0.466465	0.36929		16.1275	0.620967	0.547998	0.01938	0.918486	0.213445	0.00325		2884.38	36.8295	2816.84	80.7094	2931.89	24.6198	96.0761
J08CCQBC1 106	2009-06-18		232.106	0.580244	0.438476		4.47314	0.21097	0.307389	0.01262	0.870487	0.105541	0.00245		1726	39.1588	1727.85	62.2281	1723.77	42.635	100.237
J08CCQBC1 107	2009-06-18		106.09	0.400416	0.308596		4.60013	0.231691	0.304416	0.01261	0.822448	0.109598	0.00314		1749.29	42.0328	1713.17	62.3204	1792.73	52.1707	95.5621
J08CCQBC1 111	2009-06-18		621.071	0.475932	0.400685		2.87533	0.0843654	0.196382	0.00465	0.807	0.10619	0.00184		1375.47	22.1082	1155.86	25.0555	1735.01	31.7794	66.6196
J08CCQBC1 112	2009-06-18		305.9	0.476513	0.369502		4.34913	0.181289	0.297397	0.01057	0.852646	0.106063	0.00231		1702.73	34.4259	1678.39	52.5206	1732.82	39.9555	96.8587
J08CCQBC1 113	2009-06-18		268.433	0.527629	0.407204		4.16582	0.1361	0.285684	0.00763	0.817488	0.105758	0.00199		1667.32	26.7577	1619.92	38.2572	1727.53	34.5428	93.771
J08CCQBC1 114	2009-06-18		122.355	0.789626	0.571448		4.4543	0.187816	0.304645	0.01065	0.82909	0.106044	0.0025		1722.5	34.9781	1714.3	52.6242	1732.48	43.2518	98.9506
J08CCQBC1 115	2009-06-18		511.366	0.295941	0.23999		4.52532	0.266197	0.304172	0.0173	0.96688	0.107902	0.00162		1735.64	48.9567	1711.96	85.5175	1764.28	27.4355	97.0345
J08CCQBC1 116	2009-06-18		247.07	0.132904	0.101756		5.22483	0.191331	0.330028	0.01042	0.862194	0.114821	0.00213		1856.68	31.2193	1838.52	50.505	1877.07	33.4349	97.946
J08CCQBC1 117	2009-06-18		56.5325	0.597154	0.477511		23.7755	1.00706	0.610036	0.02285	0.884315	0.282666	0.00559		3259.23	41.2953	3070.15	91.4951	3377.72	30.8433	90.8941
J08CCQBC1 118	2009-06-18		208.358	0.35266	0.276695		4.46397	0.157067	0.301511	0.0097	0.914335	0.107379	0.00153		1724.3	29.1962	1698.8	48.0452	1755.4	26.0663	96.7756
J08CCQBC1 119	2009-06-18		94.5707	0.503004	0.381251		4.40522	0.177891	0.300574	0.01057	0.87084	0.106296	0.00211		1713.32	33.4292	1694.15	52.3923	1736.83	36.3981	97.5427
J08CCQBC1 120	2009-06-18		116.278	0.383587	0.295817		4.4944	0.150966	0.298931	0.0071	0.707097	0.109043	0.00259		1729.94	27.9061	1686	35.2367	1783.5	43.3005	94.5337
J08CCQBC1 124	2009-06-18		116.896	0.442824	0.329894		6.35534	0.258978	0.364283	0.0133	0.895961	0.126532	0.00229		2026.12	35.7659	2002.44	62.8462	2050.33	31.9638	97.6643
J08CCQBC1 125	2009-06-18		215.585	0.462315	0.348922		4.30709	0.138859	0.297495	0.00786	0.819505	0.105003	0.00194		1694.72	26.5734	1678.88	39.0517	1714.37	33.9731	97.9296
J08CCQBC1 126	2009-06-18		109.638	0.658863	0.498189		4.46201	0.169736	0.307277	0.0099	0.846956	0.105317	0.00213		1723.93	31.564	1727.29	48.8196	1719.86	37.1636	100.432
J08CCQBC1 127	2009-06-18		226.836	0.692179	0.518053		13.1088	0.489613	0.50333	0.01612	0.857474	0.188889	0.00363		2687.51	35.2507	2628.09	69.1267	2732.52	31.6341	96.1784
J08CCQBC1 128	2009-06-18		79.6758	0.416242	0.323863		4.34095	0.206231	0.294655	0.01147	0.81937	0.106849	0.00291		1701.18	39.2266	1664.75	57.1135	1746.34	49.8792	95.3278
J08CCQBC1 129	2009-06-18		307.981	0.427424	0.340682		4.84439	0.174233	0.320905	0.01031	0.893285	0.109487	0.00177		1792.64	30.2796	1794.15	50.3169	1790.89	29.4448	100.182
J08CCQBC1 130	2009-06-18		164.884	0.709686	0.546337		4.36551	0.128795	0.299466	0.00819	0.926988	0.105727	0.00117		1705.84	24.3781	1688.66	40.6297	1727	20.3164	97.78
J08CCQBC1 131	2009-06-18		145.211	0.535034	0.398219		4.35726	0.197543	0.300574	0.01088	0.798417	0.105138	0.00287		1704.27	37.4581	1694.15	53.929	1716.74	50.1796	98.6845
J08CCQBC1 132	2009-06-18		183.248	0.532748	0.413829		5.35651	0.206466	0.336067	0.01159	0.894727	0.115599	0.00199		1877.93	32.9923	1867.72	55.9222	1889.24	30.9817	98.8609
J08CCQBC1 133	2009-06-18		172.835	0.43785	0.329177		5.74951	0.172549	0.349102	0.00916	0.874298	0.119447	0.00174		1938.84	25.9637	1930.31	43.7699	1947.97	26.0346	99.0934
J08CCQBC1 137	2009-06-18		171.261	0.585785	0.452758		4.14832	0.13576	0.284727	0.00691	0.741564	0.105668	0.00232		1663.88	26.7817	1615.13	34.6728	1725.96	40.3134	93.5784
J08CCQBC1 138	2009-06-18		319.801	0.274038	0.214874		4.74193	0.111425	0.316454	0.00633	0.851269	0.108678	0.00134		1774.68	19.7064	1772.39	30.997	1777.38	22.4948	99.7191
J08CCQBC1 139	2009-06-18		157.306	0.465831	0.352508		4.6933	0.107301	0.313696	0.00584	0.814291	0.10851	0.00144		1766.05	19.139	1758.87	28.6575	1774.55	24.2196	99.1166
J08CCQBC1 140	2009-06-18		272.587	0.29635	0.222238		4.46446	0.236281	0.305365	0.01488	0.920712	0.106035	0.00219		1724.39	43.9322	1717.86	73.4866	1732.33	37.8924	99.1646
J08CCQBC1 141	2009-06-18		79.5329	0.658927	0.488205		4.24268	0.13546	0.290029	0.00761	0.821813	0.106096	0.00193		1682.32	26.2412	1641.67	38.0284	1733.38	33.3703	94.7096
J08CCQBC1 142	2009-06-18		156.069	0.766789	0.590833		4.24282	0.155193	0.292883	0.00939	0.876507	0.105065	0.00185		1682.35	30.0651	1655.92	46.8201	1715.46	32.3735	96.5294
J08CCQBC1 143	2009-06-18		87.5154	0.557277	0.436531		4.27722	0.135826	0.293077	0.00748	0.803712	0.105847	0.002		1688.99	26.1398	1656.89	37.2907	1729.08	34.6804	95.8248
J08CCQBC1 144	2009-06-18		97.2801	0.491116	0.372505		4.28023	0.138361	0.289885	0.00719	0.767284	0.107088	0.00222		1689.57	26.6128	1640.96	35.9336	1750.44	37.9478	93.7456
J08CCQBC1 145	2009-06-18		162.961	0.372664	0.282158		5.12634	0.161156	0.325012	0.00871	0.852472	0.114395	0.00188		1840.48	26.7162	1814.16	42.3763	1870.37	29.6444	96.9947
J08CCQBC1 146	2009-06-18		118.596	0.515646	0.388276		4.37315	0.12766	0.299898	0.00762	0.870403	0.105759	0.00152		1707.28	24.1289	1690.81	37.7893	1727.55	26.384	97.8728
J08CCQBC1 150	2009-06-18		119.243	0.562905	0.425959		4.31545	0.150173	0.296825	0.0074	0.716417	0.105444	0.00256		1696.32	28.6943	1675.55	36.7852	1722.08	44.5997	97.298
J08CCQBC1 151	2009-06-18		59.1648	1.12259	0.878792		5.30975	0.153139	0.331979	0.0067	0.699766	0.116001	0.00239		1870.43	24.6484	1847.97	32.4264	1895.49	37.0525	97.4931
J08CCQBC1 152	2009-06-18		181.893	0.324336	0.250244		4.1638	0.124625	0.286783	0.00733	0.853954	0.105301	0.00164		1666.93	24.5104	1625.44	36.7216	1719.59	28.6194	94.5249
J08CCQBC1 153	2009-06-18		125.871	0.84318	0.64659		18.2493	0.31445	0.590039	0.0087	0.85572	0.224317	0.002		3002.97	16.5885	2989.58	35.2723	3011.94	14.3176	99.2576
J08CCQBC1 154	2009-06-18		424.572	0.431678	0.33674		4.73567	0.150414	0.316475	0.0085	0.845616	0.108528	0.00184		1773.57	26.6338	1772.49	41.6227	1774.85	30.941	99.8672
Sample J06-CP-Q1: Quartzite, Collegiate Peaks area, Sawatch Range, Colorado (UTM Zone 13, E 373956, N 4603878)
J06CPQ1 007	2010/05/25		89.5766	0.451468	0.409308		4.44577	0.200469	0.304266	0.01372	0.931683	0.105972	0.00225		1712.79	88.2081	1712.43	67.8144	1731.24	38.9589	98.9133
J06CPQ1 008	2010/05/25		175.945	0.37613	0.339606		4.11478	0.0911193	0.292173	0.00647	0.91168	0.102142	0.00137		1794.45	103.944	1652.38	32.2779	1663.41	24.8233	99.3371
J06CPQ1 009	2010/05/25		157.654	0.519963	0.469569		4.43003	0.101654	0.308108	0.00707	0.908702	0.10428	0.00155		1861.38	71.1555	1731.39	34.8416	1701.66	27.3755	101.747
J06CPQ1 010	2010/05/25		294.105	0.308184	0.273048		4.37086	0.0775804	0.304235	0.0054	0.865384	0.104197	0.00174		1780.03	93.0975	1712.27	26.6906	1700.19	30.7614	100.711
J06CPQ1 011	2010/05/25		180.442	0.441897	0.398482		4.3515	0.14451	0.301724	0.01002	0.89736	0.104599	0.00247		1819.76	89.5897	1699.85	49.6222	1707.28	43.4604	99.5649
J06CPQ1 012	2010/05/25		290.673	0.198724	0.179307		4.39232	0.128377	0.304507	0.0089	0.925554	0.104615	0.00159		1825.24	99.1684	1713.62	43.9814	1707.57	27.9711	100.354
J06CPQ1 013	2010/05/25		197.149	0.280305	0.254506		4.04742	0.103523	0.287751	0.00736	0.91328	0.102014	0.00153		1768.49	108.892	1630.28	36.8442	1661.08	27.7655	98.1458
J06CPQ1 014	2010/05/25		142.811	0.228879	0.206752		4.55588	0.0820188	0.306619	0.00552	0.844564	0.107764	0.00205		1857.42	50.5191	1724.05	27.234	1761.95	34.7722	97.8489
J06CPQ1 015	2010/05/25		503.48	0.210283	0.191021		4.03599	0.14518	0.285783	0.01028	0.93175	0.102427	0.00168		1781.23	63.48	1620.42	51.541	1668.56	30.3358	97.1151
J06CPQ1 016	2010/05/25		289.82	0.1538	0.139273		4.25359	0.10947	0.296863	0.00764	0.897493	0.10392	0.00188		1824.71	84.3968	1675.73	37.9772	1695.28	33.3459	98.847
J06CPQ1 020	2010/05/25		441.343	0.427557	0.38522		4.5832	0.123401	0.309011	0.00832	0.89661	0.107571	0.00207		1844.84	130.437	1735.84	40.9736	1758.67	35.1889	98.7018
J06CPQ1 021	2010/05/25		219.597	0.406999	0.36694		3.9979	0.0990071	0.283063	0.00701	0.932672	0.102435	0.00113		1665.99	116.333	1606.77	35.2203	1668.7	20.4024	96.2888
J06CPQ1 022	2010/05/25		298.151	0.276942	0.239497		4.34957	0.065116	0.305263	0.00457	0.911545	0.10334	0.00097		1774.61	88.1238	1717.36	22.5703	1684.96	17.3242	101.922
J06CPQ1 023	2010/05/25		265.293	0.278078	0.248707		4.36986	0.101555	0.302498	0.00703	0.879036	0.104772	0.00204		1818.75	77.2171	1703.68	34.7937	1710.31	35.8216	99.6126
J06CPQ1 024	2010/05/25		178.537	0.279517	0.252512		4.28304	0.138495	0.298122	0.00964	0.911001	0.104197	0.00206		1794.34	78.6051	1681.99	47.8727	1700.19	36.4188	98.9298
J06CPQ1 025	2010/05/25		707.296	0.847221	0.765937		4.16768	0.135971	0.292106	0.00953	0.90294	0.103479	0.00222		1763.85	35.0088	1652.05	47.5467	1687.44	39.5836	97.9025
J06CPQ1 026	2010/05/25		115.894	0.461105	0.42416		4.36441	0.135635	0.300217	0.00933	0.933433	0.105436	0.00149		1776.16	82.1932	1692.38	46.2585	1721.93	25.9609	98.2838
J06CPQ1 027	2010/05/25		138.416	0.4327	0.41		4.34603	0.090961	0.301963	0.00632	0.84814	0.104385	0.00229		1760.31	80.0344	1701.04	31.2925	1703.5	40.3953	99.8553
J06CPQ1 028	2010/05/25		162.314	0.495359	0.435478		4.44281	0.133728	0.306978	0.00924	0.941721	0.104966	0.00129		1753.12	84.8816	1725.82	45.5752	1713.72	22.6003	100.706
J06CPQ1 029	2010/05/25		372.227	0.218213	0.191305		4.29387	0.111478	0.299666	0.00778	0.910585	0.103922	0.00167		1738.56	74.1857	1689.65	38.5897	1695.32	29.6202	99.6657
J06CPQ1 033	2010/05/25		205.319	0.147627	0.115495		4.15537	0.14169	0.291218	0.00993	0.923576	0.103488	0.00182		1727.99	222.31	1647.61	49.5766	1687.6	32.448	97.6307
J06CPQ1 034	2010/05/25		204.075	0.815446	0.729319		4.35705	0.183562	0.302398	0.01274	0.921518	0.104499	0.0024		1719.4	111.385	1703.19	63.0606	1705.52	42.2786	99.8635
J06CPQ1 035	2010/05/25		181.202	0.45248	0.404513		4.3621	0.114122	0.304638	0.00797	0.921036	0.103851	0.00151		1734.29	146.921	1714.27	39.3815	1694.05	26.8051	101.193
J06CPQ1 036	2010/05/25		258.398	0.347475	0.306178		4.38905	0.184961	0.306586	0.01292	0.899725	0.103829	0.00311		1735.36	81.8028	1723.88	63.7466	1693.66	55.2225	101.785
J06CPQ1 037	2010/05/25		492.161	0.167741	0.149971		4.057	0.141757	0.283333	0.0099	0.938002	0.10385	0.00147		1703.38	127.451	1608.13	49.7305	1694.04	26.0953	94.9286
J06CPQ1 038	2010/05/25		118.36	0.535053	0.478536		4.33004	0.137079	0.302296	0.00957	0.90642	0.103886	0.00215		1787.27	75.8573	1702.69	47.3727	1694.68	38.1503	100.472
J06CPQ1 039	2010/05/25		168.725	0.325502	0.254959		4.47814	0.14074	0.31214	0.00981	0.934494	0.104051	0.00154		1772.77	129.977	1751.23	48.1965	1697.61	27.2728	103.159
J06CPQ1 040	2010/05/25		127.324	0.463612	0.460394		4.73004	0.220893	0.314347	0.01468	0.916564	0.109133	0.00295		2204.58	1721.73	1762.06	72.0033	1784.99	49.2697	98.7158
J06CPQ1 041	2010/05/25		237.965	0.388636	0.3412		3.96377	0.158573	0.28446	0.01138	0.924381	0.101062	0.00206		1779.34	277.652	1613.79	57.1151	1643.7	37.82	98.1799
J06CPQ1 042	2010/05/25		174.22	0.294625	0.262746		4.18914	0.107427	0.293243	0.00752	0.935052	0.103609	0.00117		1715.28	126.262	1657.72	37.4853	1689.75	20.8295	98.1043
J06CPQ1 046	2010/05/25		149.512	0.458122	0.405531		4.2842	0.157243	0.296978	0.0109	0.93684	0.104627	0.00165		1776.65	129.582	1676.31	54.1779	1707.77	29.0227	98.1576
J06CPQ1 047	2010/05/25		147.898	0.409613	0.364377		4.30642	0.14375	0.302272	0.01009	0.932982	0.103328	0.00162		1778.09	150.49	1702.57	49.9478	1684.74	28.9376	101.058
J06CPQ1 048	2010/05/25		319.405	0.335275	0.28797		4.76269	0.138008	0.32129	0.00931	0.934271	0.107511	0.00147		1864.04	78.7031	1796.03	45.4231	1757.65	25.0062	102.183
J06CPQ1 049	2010/05/25		188.34	0.239108	0.207949		4.39967	0.112701	0.3045	0.0078	0.885705	0.104793	0.00214		1744.88	78.4269	1713.59	38.5455	1710.68	37.5682	100.17
J06CPQ1 050	2010/05/25		170.859	0.18031	0.160719		3.51761	0.213919	0.24978	0.01519	0.897854	0.102138	0.00372		1123.46	1130.18	1437.34	78.3545	1663.34	67.4064	86.4128
J06CPQ1 051	2010/05/25		314.82	0.373873	0.330242		4.21275	0.159121	0.294668	0.01113	0.961184	0.103689	0.00103		1695.75	91.4421	1664.81	55.4199	1691.17	18.3195	98.4412
J06CPQ1 052	2010/05/25		96.6195	0.251313	0.220491		4.00158	0.12706	0.283758	0.00901	0.869143	0.102278	0.00282		1690.64	129.948	1610.26	45.2446	1665.87	51.0122	96.6616
J06CPQ1 053	2010/05/25		210.481	0.358082	0.332874		4.77328	0.350838	0.334283	0.02457	0.955836	0.103562	0.00259		1994.58	303.101	1859.11	118.72	1688.92	46.1352	110.077
J06CPQ1 054	2010/05/25		152.616	0.330991	0.277822		4.30141	0.123738	0.304169	0.00875	0.835477	0.102564	0.00342		1654.14	167.247	1711.95	43.2513	1671.03	61.653	102.449
J06CPQ1 055	2010/05/25		467.447	0.216945	0.191494		4.17955	0.0971856	0.29115	0.00677	0.907108	0.104115	0.00151		1738.22	121.297	1647.27	33.8014	1698.73	26.7214	96.9709
J06CPQ1 059	2010/05/25		223.128	0.433726	0.394639		4.30903	0.194776	0.297776	0.01346	0.960158	0.104952	0.00128		1788.96	125.803	1680.27	66.862	1713.47	22.4288	98.0627
J06CPQ1 060	2010/05/25		260.174	0.345829	0.31275		4.78836	0.104235	0.316513	0.00689	0.93723	0.109722	0.00104		1898.33	81.6978	1772.68	33.7378	1794.8	17.2554	98.7672
J06CPQ1 061	2010/05/25		130.868	0.336432	0.304071		4.86527	0.182581	0.322698	0.01211	0.898205	0.109348	0.00297		1869.46	136.543	1802.89	59.022	1788.57	49.4843	100.801
J06CPQ1 062	2010/05/25		114.501	0.430856	0.389719		4.4056	0.117524	0.305142	0.00814	0.901805	0.104713	0.00192		1795.84	92.8398	1716.76	40.206	1709.29	33.7376	100.437
J06CPQ1 063	2010/05/25		94.2655	0.46659	0.422063		10.5101	0.369449	0.463135	0.01628	0.940326	0.164588	0.00239		2582.92	164.538	2453.39	71.7309	2503.35	24.4351	98.004
J06CPQ1 064	2010/05/25		284.763	0.307954	0.273935		4.05059	0.0805336	0.291722	0.0058	0.801672	0.100704	0.0027		1843.81	174.541	1650.13	28.9454	1637.13	49.7879	100.794
J06CPQ1 065	2010/05/25		370.284	0.425539	0.380773		4.07864	0.225693	0.289868	0.01604	0.969826	0.10205	0.00115		1799.05	165.313	1640.87	80.1677	1661.74	20.8604	98.7443
J06CPQ1 066	2010/05/25		166.291	0.394108	0.337806		4.16032	0.152399	0.291825	0.01069	0.888461	0.103396	0.00286		1818.33	151.669	1650.65	53.346	1685.95	51.0459	97.9059
J06CPQ1 067	2010/05/25		378.566	0.205868	0.185871		4.24707	0.152162	0.2967	0.01063	0.944169	0.103817	0.00142		1779.02	70.8907	1674.92	52.8472	1693.46	25.2175	98.9054
J06CPQ1 068	2010/05/25		327.879	0.418502	0.377371		4.40759	0.132921	0.30374	0.00916	0.918193	0.105244	0.0018		1894.55	77.6642	1709.83	45.2929	1718.58	31.4326	99.4905
J06CPQ1 072	2010/05/25		426.836	0.201456	0.180218		4.32876	0.125968	0.301371	0.00877	0.953702	0.104174	0.00097		1888.88	89.4679	1698.1	43.4433	1699.78	17.1533	99.9012
J06CPQ1 073	2010/05/25		128.411	0.385062	0.345783		4.48159	0.150245	0.309918	0.01039	0.911054	0.104878	0.00222		1918.13	172.798	1740.3	51.1327	1712.17	38.9337	101.643
J06CPQ1 074	2010/05/25		171.218	0.144749	0.132314		4.82514	0.157941	0.321695	0.01053	0.924239	0.108784	0.00192		2009.2	94.9759	1798	51.3599	1779.15	32.1931	101.06
J06CPQ1 075	2010/05/25		145.673	0.479548	0.447921		4.36967	0.180438	0.301743	0.01246	0.951672	0.105029	0.00144		1838.53	100.211	1699.95	61.7055	1714.82	25.2096	99.1327
J06CPQ1 076	2010/05/25		234.929	0.458294	0.417383		3.87809	0.175454	0.2743	0.01241	0.920333	0.102539	0.00237		1798.41	167.907	1562.59	62.7815	1670.59	42.7369	93.5353
J06CPQ1 077	2010/05/25		349.612	0.079381	0.0705263		1.40425	0.215667	0.114857	0.01764	0.849215	0.0886715	0.00627		1433.38	695.422	700.894	102.008	1397.07	135.571	50.1688
J06CPQ1 078	2010/05/25		117.313	0.233941	0.204399		4.40184	0.304083	0.297912	0.02058	0.913351	0.107163	0.00429		1802.06	186.736	1680.94	102.224	1751.72	73.2683	95.9594
J06CPQ1 079	2010/05/25		274.28	0.250282	0.228283		4.78967	0.119744	0.319594	0.00799	0.925106	0.108694	0.00144		1885.94	82.4844	1787.75	39.0328	1777.64	24.1693	100.568
J06CPQ1 080	2010/05/25		155.573	0.422404	0.384745		4.15639	0.205364	0.28355	0.01401	0.90383	0.106313	0.00324		1810.77	257.073	1609.21	70.3657	1737.13	55.8798	92.6363
J06CPQ1 081	2010/05/25		176.043	0.289043	0.258664		3.92643	0.166132	0.28314	0.01198	0.895774	0.100576	0.00299		1783.03	130.836	1607.16	60.1885	1634.77	55.2224	98.311
J06CPQ1 085	2010/05/25		204.802	0.483755	0.434827		4.22976	0.185048	0.288921	0.01264	0.928517	0.106178	0.00217		1827.43	80.5077	1636.13	63.2198	1734.81	37.484	94.312
J06CPQ1 086	2010/05/25		226.121	0.266844	0.283911		4.69936	0.19628	0.312445	0.01305	0.90203	0.109085	0.00308		1667.39	1189.17	1752.73	64.1006	1784.18	51.4687	98.2371
J06CPQ1 087	2010/05/25		148.233	0.408833	0.357379		4.34893	0.163759	0.300624	0.01132	0.924192	0.10492	0.00206		1776.81	101.258	1694.4	56.1079	1712.91	36.1099	98.9197
J06CPQ1 088	2010/05/25		116.468	0.37798	0.341108		4.4149	0.149326	0.303047	0.01025	0.94663	0.10566	0.00131		1810.56	125.483	1706.4	50.7097	1725.82	22.7653	98.8746
J06CPQ1 089	2010/05/25		248.683	0.266846	0.238857		4.29071	0.112893	0.297973	0.00784	0.893221	0.104436	0.00201		1757.63	59.1072	1681.25	38.938	1704.41	35.4346	98.6413
J06CPQ1 090	2010/05/25		81.4322	0.233083	0.214674		4.39427	0.169537	0.302996	0.01169	0.941802	0.105184	0.00163		1900.23	140.016	1706.15	57.8364	1717.53	28.4841	99.3371
J06CPQ1 091	2010/05/25		309.586	0.28242	0.253692		4.76607	0.150708	0.315614	0.00998	0.931703	0.109522	0.00164		1878.55	95.4077	1768.27	48.9022	1791.48	27.2713	98.7044
J06CPQ1 092	2010/05/25		70.7045	0.446584	0.400137		6.85389	0.258018	0.385703	0.01452	0.92752	0.128879	0.00256		2165.18	165.432	2102.87	67.5508	2082.74	34.9525	100.966
J06CPQ1 093	2010/05/25		274.088	0.39293	0.353765		4.06893	0.156991	0.287693	0.0111	0.921824	0.102577	0.00208		1728.97	123.764	1629.99	55.5699	1671.27	37.4905	97.5301
J06CPQ1 094	2010/05/25		124.17	0.526032	0.471014		4.24473	0.155414	0.294428	0.01078	0.93921	0.104561	0.00157		1797.79	109.104	1663.62	53.687	1706.61	27.637	97.4809
J06CPQ1 098	2010/05/25		151.74	0.348638	0.311527		4.55048	0.159241	0.317765	0.01112	0.944374	0.10386	0.00148		1958.98	152.818	1778.81	54.3995	1694.22	26.2696	104.992
J06CPQ1 099	2010/05/25		147.826	0.356904	0.317877		4.33392	0.15437	0.306016	0.0109	0.9493	0.102715	0.00132		1842.23	134.882	1721.07	53.803	1673.76	23.7525	102.827
J06CPQ1 100	2010/05/25		140.643	0.38356	0.339046		4.38718	0.202159	0.300784	0.01386	0.96072	0.105786	0.0013		1835.6	109.639	1695.19	68.6899	1728.02	22.5582	98.1003
J06CPQ1 101	2010/05/25		144.256	0.396499	0.352347		4.52767	0.198433	0.309172	0.01355	0.96076	0.106212	0.00127		1945.1	136.768	1736.63	66.7231	1735.39	21.9291	100.071
J06CPQ1 102	2010/05/25		162.833	0.536009	0.476892		4.89778	0.09963	0.323963	0.00659	0.896721	0.109649	0.00164		1963.85	76.2979	1809.05	32.0872	1793.58	27.2328	100.863
J06CPQ1 103	2010/05/25		109.77	0.530311	0.471398		4.2364	0.192927	0.300175	0.01367	0.927623	0.102358	0.00237		1838.88	113.681	1692.17	67.7799	1667.32	42.8305	101.491
J06CPQ1 104	2010/05/25		365.145	0.514726	0.458599		4.23914	0.119319	0.297724	0.00838	0.888048	0.103267	0.00225		1842.35	77.496	1680.01	41.628	1683.66	40.2202	99.7836
J06CPQ1 105	2010/05/25		140.822	0.364416	0.313793		4.27845	0.272543	0.29497	0.01879	0.915375	0.105198	0.00382		1853.22	124.666	1666.32	93.544	1717.78	66.743	97.0041
J06CPQ1 106	2010/05/25		880.601	0.289358	0.255986		3.51695	0.226335	0.253746	0.01633	0.946868	0.100523	0.00207		1670.44	168.043	1457.77	83.969	1633.78	38.2561	89.2268
J06CPQ1 107	2010/05/25		372.972	0.239399	0.177418		4.48917	0.202309	0.314872	0.01419	0.916872	0.103402	0.00283		1864.04	148.377	1764.64	69.5719	1686.07	50.5064	104.66
J06CPQ1 111	2010/05/25		60.6	0.247934	0.225995		4.53541	0.661998	0.31056	0.04533	0.937551	0.105918	0.00679		1978.2	300.597	1743.46	223.059	1730.31	117.643	100.76
J06CPQ1 112	2010/05/25		495.956	0.258354	0.229523		4.24974	0.221608	0.303185	0.01581	0.899983	0.101661	0.00379		1878.99	139.426	1707.08	78.2105	1654.66	69.0743	103.168
J06CPQ1 113	2010/05/25		292.977	0.292681	0.247312		4.42624	0.4055	0.303342	0.02779	0.955151	0.105828	0.00298		1810.58	132.506	1707.86	137.472	1728.75	51.6852	98.7916
J06CPQ1 114	2010/05/25		110.47	0.369132	0.328276		4.26694	0.481288	0.296557	0.03345	0.934892	0.104354	0.00522		1790.8	249.927	1674.21	166.349	1702.95	92.1139	98.3125
J06CPQ1 115	2010/05/25		117.179	0.342711	0.291605		4.38961	0.251438	0.313371	0.01795	0.884852	0.101593	0.00495		1855.18	122.441	1757.27	88.1094	1653.43	90.2897	106.28
J06CPQ1 116	2010/05/25		259.396	0.30854	0.273014		4.40603	0.306373	0.303013	0.02107	0.921751	0.105459	0.00396		1818.06	78.8824	1706.23	104.249	1722.33	68.9783	99.0653
J06CPQ1 117	2010/05/25		302.217	0.353261	0.315753		4.4333	0.192169	0.306828	0.0133	0.937261	0.104793	0.002		1853.71	115.073	1725.08	65.6095	1710.68	35.1105	100.842
J06CPQ1 119	2010/05/25		219.813	0.501871	0.448755		4.81144	0.137594	0.319611	0.00914	0.939448	0.109182	0.00133		1954.74	97.6177	1787.83	44.6504	1785.82	22.2007	100.113
J06CPQ1 120	2010/05/25		285.097	0.374222	0.334139		4.2893	0.209695	0.298438	0.01459	0.938767	0.104239	0.00214		1895.72	115.938	1683.56	72.4387	1700.93	37.8143	98.9788
J06CPQ1 124	2010/05/25		141.496	0.411648	0.369964		4.49479	0.201161	0.310585	0.0139	0.934002	0.104961	0.0022		1953.2	98.9096	1743.58	68.3729	1713.63	38.5453	101.748
J06CPQ1 125	2010/05/25		312.839	0.32315	0.292147		4.40421	0.139115	0.303923	0.0096	0.942599	0.1051	0.00132		1896.7	100.291	1710.73	47.4619	1716.07	23.0895	99.6892
J06CPQ1 126	2010/05/25		194.736	0.200416	0.167801		4.22237	0.228712	0.297416	0.01611	0.967388	0.102965	0.00125		1927.17	96.2809	1678.48	80.0492	1678.25	22.4254	100.014
J06CPQ1 127	2010/05/25		120.843	0.29369	0.264439		4.61541	0.382303	0.319684	0.02648	0.95417	0.10471	0.0029		1930.56	288.077	1788.18	129.367	1709.23	50.9598	104.619
J06CPQ1 128	2010/05/25		293.31	0.219813	0.197294		4.51999	0.123909	0.314442	0.00862	0.85081	0.104255	0.00307		1929.76	142.2	1762.53	42.2756	1701.21	54.2376	103.605
J06CPQ1 129	2010/05/25		205.043	0.355709	0.31794		4.36695	0.490477	0.302807	0.03401	0.940467	0.104595	0.00485		1938.1	246.643	1705.21	168.323	1707.2	85.3415	99.8835
J06CPQ1 130	2010/05/25		117.975	0.186146	0.169983		4.71866	0.27445	0.323059	0.01879	0.929733	0.105934	0.00317		1897.26	204.261	1804.65	91.5577	1730.58	54.913	104.28
J06CPQ1 131	2010/05/25		218.974	0.186841	0.166895		4.34582	0.242463	0.302372	0.01687	0.929064	0.104239	0.00287		1896.96	107.098	1703.06	83.5069	1700.92	50.7139	100.126
J06CPQ1 132	2010/05/25		367.314	0.158746	0.143394		4.2486	0.248243	0.291976	0.01706	0.906593	0.105535	0.00383		1831.03	214.718	1651.4	85.1271	1723.66	66.6548	95.8078
J06CPQ1 133	2010/05/25		232.564	0.170347	0.151142		4.43089	0.219942	0.310244	0.0154	0.920689	0.103582	0.00293		1887.08	146.919	1741.91	75.7716	1689.28	52.179	103.116
J06CPQ1 137	2010/05/25		176.326	0.352559	0.318791		4.64933	0.412554	0.312394	0.02772	0.965863	0.107941	0.00226		1968.63	195.289	1752.48	136.18	1764.95	38.257	99.2932
J06CPQ1 138	2010/05/25		100.976	0.442825	0.400858		4.30274	0.293683	0.299759	0.02046	0.945458	0.104105	0.00267		1881.97	104.415	1690.11	101.484	1698.56	47.2544	99.5027
J06CPQ1 139	2010/05/25		138.291	0.269349	0.243887		4.38254	0.252639	0.30392	0.01752	0.890165	0.104584	0.00462		1860.16	96.9694	1710.72	86.6219	1707.01	81.3047	100.217
J06CPQ1 140	2010/05/25		202.681	0.49231	0.448305		4.30205	0.255813	0.29985	0.01783	0.894864	0.104057	0.0045		1797.26	147.943	1690.57	88.4308	1697.7	79.688	99.5796
J06CPQ1 141	2010/05/25		584.515	0.133531	0.124079		3.77846	0.336371	0.277792	0.02473	0.925194	0.0986491	0.00442		1746.51	165.372	1580.23	124.778	1598.74	83.6169	98.8423
J06CPQ1 142	2010/05/25		133.45	0.505203	0.459282		4.28008	0.223102	0.296783	0.01547	0.894211	0.104595	0.00393		1779.35	147.519	1675.34	76.9063	1707.21	69.1529	98.1333
J06CPQ1 143	2010/05/25		120.662	0.359614	0.32248		4.48348	0.380708	0.313613	0.02663	0.939925	0.103686	0.00383		1824.98	133.151	1758.46	130.702	1691.12	68.1228	103.982
J06CPQ1 144	2010/05/25		320.232	0.383896	0.34854		4.44795	0.2637	0.300241	0.0178	0.943559	0.107446	0.00241		1881.37	266.307	1692.5	88.2554	1756.54	41.0272	96.3544
J06CPQ1 145	2010/05/25		471.874	0.562023	0.521294		3.1173	0.160331	0.223205	0.01148	0.913468	0.101292	0.00238		1763.29	76.1326	1298.79	60.5026	1647.92	43.5722	78.8137
J06CPQ1 146	2010/05/25		315.17	0.269098	0.24385		3.57837	0.196782	0.264583	0.01455	0.8454	0.0980892	0.00534		1809.31	61.9133	1513.25	74.1742	1588.11	101.739	95.286
J06CPQ1 150	2010/05/25		179.231	0.164774	0.149669		4.16597	0.191453	0.288969	0.01328	0.896842	0.104559	0.00329		1784.2	142.672	1636.37	66.4185	1706.58	57.9156	95.8862
J06CPQ1 151	2010/05/25		135.536	0.327441	0.28065		4.12824	0.254748	0.286994	0.01771	0.946427	0.104326	0.00227		1819.16	110.467	1626.49	88.7131	1702.46	40.0704	95.5377
J06CPQ1 152	2010/05/25		345.197	0.248238	0.225174		4.32682	0.15862	0.298966	0.01096	0.898975	0.104966	0.00266		1845.18	106.266	1686.18	54.3928	1713.71	46.6023	98.3933
J06CPQ1 153	2010/05/25		78.1921	0.300085	0.271484		4.69244	0.316373	0.309988	0.0209	0.878525	0.109787	0.00611		1854.66	174.632	1740.65	102.857	1795.88	101.302	96.9247
J06CPQ1 154	2010/05/25		100.055	0.470956	0.423425		4.23572	0.307611	0.295361	0.02145	0.883975	0.104009	0.00597		1737.53	186.22	1668.26	106.756	1696.87	105.779	98.3144
aU and Pb concentrations and Th/U ratios are calculated relative to GJ-1 reference zircon
bCorrected for background and within-run Pb/U fractionation and normalised to reference zircon GJ-1 (ID-TIMS values/measured value); 207Pb/235U calculated using (207Pb/206Pb)/(238U/206Pb * 1/137.88)
cRho is the error correlation defined as the quotient of the propagated errors of the 206Pb/238U and the 207/235U ratio
dQuadratic addition of within-run errors (2 SD) and daily reproducibility of GJ-1 (2 SD)
ecorrected for mass-bias by normalising to GJ-1 reference zircon (~0.6 per atomic mass unit) and common Pb using the model Pb composition of Stacey & Kramers (1975)

## Sheet: Sheet2
Appendix 1. LA-ICP-MS U-Pb Isotopic Data and Ages
							Corrected isotopic ratios								Ages (Ma)
Analysis	Date		Ua [ppm]	Th/Ucalc	Th/Umeas.		207Pb/235Ub	±2sd	206Pb/238Ub	±2sd	Rhoc	207Pb/206Pbe	±2sd		207Pb/235U	±2s	206Pb/238U	±2s	207Pb/206Pb	±2s	Conc %
J07-PIC2-2010-007	2010/05/19		154.656	0.757365	0.773463		13.0891	0.3034	0.507186	0.01546	0.915188	0.187134	0.00321		2686	35.9551	2645	46.5743	2717.13	28.2767	98.4736
J07-PIC2-2010-008	2010/05/19		369.138	0.368331	0.376311		4.50116	0.0853	0.307147	0.00735	0.927275	0.106268	0.00126		1731	18.2047	1727	22.9408	1736.36	21.7423	99.7689
J07-PIC2-2010-009	2010/05/19		156.961	0.663877	0.679654		4.2667	0.09816	0.297504	0.00791	0.874641	0.103966	0.00235		1687	22.4141	1679	25.7934	1696.1	41.6595	99.5258
J07-PIC2-2010-010	2010/05/19		85.845	0.705817	0.721709		4.23749	0.09762	0.295547	0.00951	0.918358	0.103982	0.00181		1681	21.4891	1669	29.8182	1696.38	32.0806	99.2861
J07-PIC2-2010-011	2010/05/19		344.311	1.07057	1.23629		3.38641	0.61972	0.235797	0.04438	0.985698	0.104227	0.0015		1501	158.592	1365	148.349	1700.72	26.5091	90.9394
J07-PIC2-2010-012	2010/05/19		387.547	0.0794244	0.0811661		4.6077	0.08362	0.314096	0.00879	0.910989	0.106443	0.00181		1751	17.6348	1761	27.3555	1739.37	31.17	100.571
J07-PIC2-2010-013	2010/05/19		158.457	0.646055	0.658649		4.20398	0.10094	0.299481	0.00953	0.927257	0.102086	0.00162		1675	24.2583	1689	32.4176	1662.39	29.3731	100.836
J07-PIC2-2010-014	2010/05/19		174.439	0.706938	0.724782		4.19554	0.08762	0.295108	0.00824	0.906155	0.103355	0.00181		1673	20.1794	1667	26.8989	1685.22	32.321	99.6414
J07-PIC2-2010-015	2010/05/19		133.349	0.732231	0.74819		3.21933	0.08671	0.252036	0.00733	0.901898	0.0926938	0.0017		1462	22.7398	1449	24.3361	1481.64	34.7607	99.1108
J07-PIC2-2010-016	2010/05/19		359.133	1.36881	1.4169		3.10604	0.32835	0.213994	0.01793	0.935172	0.105155	0.00283		1434	91.4178	1250	63.1672	1717.02	49.4708	87.1688
J07-PIC2-2010-020	2010/05/19		335.593	0.42941	0.440803		4.42491	0.14802	0.306673	0.0112	0.934018	0.104642	0.00176		1717	33.1667	1724	36.3649	1708.04	30.952	100.408
J07-PIC2-2010-021	2010/05/19		153.411	0.21691	0.221299		4.62444	0.12197	0.313521	0.00947	0.94041	0.106932	0.00134		1754	25.6689	1758	29.4866	1747.76	22.9466	100.228
J07-PIC2-2010-022	2010/05/19		148.856	0.398938	0.409384		4.50535	0.12215	0.307543	0.00614	0.841018	0.10626	0.00237		1732	27.1171	1729	19.9599	1736.22	40.9001	99.8268
J07-PIC2-2010-023	2010/05/19		207.337	0.292044	0.298013		4.34055	0.06922	0.299605	0.0074	0.919781	0.105141	0.00137		1701	16.3679	1689	25.1662	1716.78	23.9527	99.2945
J07-PIC2-2010-024	2010/05/19		127.835	0.232147	0.236713		4.85332	0.13016	0.319601	0.01138	0.945737	0.110165	0.00145		1794	29.0191	1788	38.4215	1802.12	23.9399	99.6656
J07-PIC2-2010-025	2010/05/19		447.253	0.541341	0.56661		4.59664	0.11367	0.307303	0.00766	0.835696	0.108468	0.003		1749	24.977	1727	24.8766	1773.84	50.4813	98.7421
J07-PIC2-2010-026	2010/05/19		347.817	0.179933	0.184432		4.81757	0.07346	0.319816	0.0058	0.892665	0.109284	0.00148		1788	15.7514	1789	18.7499	1787.51	24.6765	100.056
J07-PIC2-2010-027	2010/05/19		138.738	0.577804	0.619505		4.63368	0.13592	0.309365	0.01111	0.877215	0.108776	0.00323		1755	29.7269	1738	36.0568	1779.01	54.1631	99.0313
J07-PIC2-2010-028	2010/05/19		167.442	0.468151	0.478322		4.72815	0.08838	0.315608	0.00856	0.933792	0.108678	0.00132		1772	19.1318	1768	27.6926	1777.38	22.1591	99.7743
J07-PIC2-2010-029	2010/05/19		166.575	0.309384	0.316545		5.23224	0.15742	0.33218	0.00774	0.931963	0.11423	0.00129		1858	33.7156	1849	25.9934	1867.77	20.3769	99.5156
J07-PIC2-2010-033	2010/05/19		60.1612	0.602475	0.601587		4.49005	0.14531	0.303501	0.00859	0.84186	0.107268	0.00327		1729	32.3099	1709	27.947	1753.52	55.7806	98.8433
J07-PIC2-2010-034	2010/05/19		173.021	0.404916	0.404167		12.7136	0.25296	0.509716	0.01044	0.895408	0.180855	0.0027		2659	30.5567	2655	31.4181	2660.73	24.7405	99.8496
J07-PIC2-2010-035	2010/05/19		123	0.38825	0.386789		4.66694	0.14079	0.311666	0.00948	0.914525	0.10861	0.00195		1761	30.6766	1749	30.7525	1776.23	32.7603	99.3186
J07-PIC2-2010-036	2010/05/19		155.763	0.620077	0.616081		4.28107	0.09769	0.297855	0.00716	0.878979	0.104196	0.00207		1690	22.2718	1681	23.3601	1700.17	36.596	99.4675
J07-PIC2-2010-037	2010/05/19		267.471	0.332872	0.331691		4.38852	0.09766	0.302275	0.00817	0.917204	0.105245	0.0016		1710	21.9767	1703	26.5938	1718.6	27.9399	99.5906
J07-PIC2-2010-038	2010/05/19		140.508	0.488512	0.483562		4.37653	0.09511	0.301018	0.00587	0.897962	0.105457	0.00145		1708	20.5969	1696	18.3608	1722.29	25.2579	99.2974
J07-PIC2-2010-039	2010/05/19		203.052	0.265277	0.264024		4.81219	0.10266	0.319328	0.01123	0.929913	0.109364	0.00181		1787	22.0187	1786	36.2846	1788.84	30.1516	99.944
J07-PIC2-2010-040	2010/05/19		282.085	0.236143	0.235764		4.40699	0.08852	0.30302	0.00695	0.929142	0.105449	0.00117		1714	20.7683	1706	23.6088	1722.16	20.3823	99.5333
J07-PIC2-2010-041	2010/05/19		109.652	0.26703	0.265846		4.85323	0.15361	0.319997	0.00854	0.92832	0.10992	0.00149		1794	35.9167	1790	30.2388	1798.08	24.6673	99.777
J07-PIC2-2010-042	2010/05/19		89.0505	0.438742	0.431042		4.27672	0.12509	0.300876	0.00627	0.830696	0.10295	0.00257		1689	28.5269	1696	20.4308	1677.97	46.1153	100.414
J07-PIC2-2010-046	2010/05/19		259.477	0.325222	0.320712		4.4055	0.12228	0.302798	0.00846	0.901591	0.105623	0.002		1713	27.4571	1705	27.5274	1725.18	34.7711	99.533
J07-PIC2-2010-047	2010/05/19		140.087	0.312917	0.296039		4.5565	0.09649	0.31046	0.00766	0.92523	0.106455	0.00136		1741	21.2935	1743	24.8573	1739.58	23.4172	100.115
J07-PIC2-2010-048	2010/05/19		84.8541	0.599539	0.587273		4.11514	0.15495	0.28622	0.01169	0.910745	0.104303	0.00249		1657	34.6142	1623	36.7817	1702.05	43.9659	97.9481
J07-PIC2-2010-049	2010/05/19		105.104	0.589586	0.579011		4.15331	0.06635	0.288573	0.0081	0.877162	0.104495	0.00226		1665	14.7634	1634	25.4735	1705.45	39.8141	98.1381
J07-PIC2-2010-050	2010/05/19		304.076	0.469543	0.462773		4.76108	0.12762	0.318624	0.01072	0.926566	0.108402	0.00186		1778	27.5229	1783	34.6514	1772.74	31.3217	100.281
J07-PIC2-2010-051	2010/05/19		189.804	0.344214	0.340322		4.19632	0.13163	0.292701	0.0069	0.813551	0.103856	0.00309		1673	30.3043	1655	22.5507	1694.14	54.8496	98.9241
J07-PIC2-2010-052	2010/05/19		383.009	0.597661	0.592902		3.20231	0.06631	0.249267	0.00616	0.91684	0.0930323	0.0012		1458	18.2119	1435	21.4214	1488.54	24.425	98.4225
J07-PIC2-2010-053	2010/05/19		178.775	0.305149	0.30172		4.44768	0.08528	0.302268	0.00776	0.912178	0.106704	0.0016		1721	19.9071	1703	26.3819	1743.86	27.4707	98.9541
J07-PIC2-2010-054	2010/05/19		202.058	0.785824	0.771288		4.24443	0.13897	0.29442	0.0103	0.945371	0.10455	0.00134		1683	33.2334	1664	35.1158	1706.41	23.5915	98.8711
J07-PIC2-2010-055	2010/05/19		136.949	0.685607	0.673591		4.16528	0.16775	0.292666	0.00977	0.831273	0.103193	0.00396		1667	37.2456	1655	30.6788	1682.32	70.8507	99.2801
J07-PIC2-2010-059	2010/05/19		200.334	0.374239	0.368323		4.23105	0.08824	0.295809	0.00736	0.92587	0.103782	0.00129		1680	20.2364	1670	24.0069	1692.83	22.9185	99.4048
J07-PIC2-2010-060	2010/05/19		125.04	0.46056	0.452389		4.22224	0.09433	0.299518	0.00694	0.919819	0.102279	0.00133		1678	22.6122	1689	23.6402	1665.88	24.0587	100.656
J07-PIC2-2010-061	2010/05/19		239.895	1.05255	1.03779		12.7369	0.32085	0.502995	0.01636	0.92356	0.183671	0.00306		2660	38.6948	2627	49.3491	2686.3	27.5428	98.7594
J07-PIC2-2010-062	2010/05/19		109.172	0.473395	0.458627		4.85448	0.30428	0.325965	0.01354	0.811246	0.10806	0.00618		1794	62.3792	1819	41.9207	1766.96	104.473	101.394
J07-PIC2-2010-063	2010/05/19		163.318	0.580431	0.573997		4.44394	0.07447	0.304788	0.0064	0.910633	0.105721	0.00135		1721	17.4008	1715	21.7518	1726.88	23.4437	99.6514
J07-PIC2-2010-064	2010/05/19		195.649	0.43577	0.42963		4.1988	0.13781	0.294793	0.00938	0.942644	0.10336	0.00129		1674	31.7264	1665	30.6212	1685.31	23.0341	99.4624
J07-PIC2-2010-065	2010/05/19		116.48	0.676113	0.666892		4.16106	0.12369	0.290946	0.00946	0.901122	0.103776	0.00223		1666	27.4757	1646	29.7168	1692.72	39.6217	98.7995
J07-PIC2-2010-066	2010/05/19		157.297	0.307681	0.302648		4.64884	0.08424	0.311465	0.00726	0.90545	0.108285	0.00162		1758	18.4015	1748	23.5437	1770.76	27.3165	99.4312
J07-PIC2-2010-067	2010/05/19		251.242	0.381655	0.383939		4.27821	0.16532	0.298346	0.01019	0.937043	0.104018	0.00155		1689	37.687	1683	33.2235	1697.02	27.4606	99.6448
J07-PIC2-2010-068	2010/05/19		178.292	0.772185	0.772144		4.12154	0.1322	0.29082	0.01244	0.924709	0.102831	0.00219		1659	29.523	1646	39.065	1675.84	39.3527	99.2164
J07-PIC2-2010-072	2010/05/19		149.184	0.674194	0.6634		4.39923	0.22561	0.301374	0.01305	0.926173	0.105926	0.00234		1712	50.6949	1698	42.4773	1730.44	40.539	99.1822
J07-PIC2-2010-073	2010/05/19		219.526	0.23308	0.228986		4.62318	0.13168	0.310974	0.00931	0.906404	0.107878	0.00209		1753	28.8326	1745	30.1848	1763.88	35.4048	99.5436
J07-PIC2-2010-074	2010/05/19		138.856	0.466732	0.460101		4.2388	0.11382	0.295073	0.00734	0.89671	0.104225	0.00183		1682	27.2414	1667	25.019	1700.69	32.3418	99.1082
J07-PIC2-2010-075	2010/05/19		279.732	0.475378	0.461727		4.31297	0.09044	0.30271	0.00916	0.947617	0.103444	0.00111		1696	21.4529	1705	31.1473	1686.81	19.8001	100.531
J07-PIC2-2010-076	2010/05/19		574.194	0.0753572	0.0740065		4.73548	0.07334	0.32082	0.00835	0.899192	0.107199	0.00193		1774	15.8734	1794	26.9659	1752.34	32.9485	101.127
J07-PIC2-2010-077	2010/05/19		283.754	0.446036	0.439475		4.07345	0.17429	0.290943	0.01164	0.93566	0.101571	0.0018		1649	40.7383	1646	38.0283	1653.02	32.8417	99.8181
J07-PIC2-2010-078	2010/05/19		201.164	0.736969	0.732551		4.42615	0.09879	0.30557	0.00745	0.907204	0.105141	0.00165		1717	22.1323	1719	24.2146	1716.79	28.8479	100.116
J07-PIC2-2010-079	2010/05/19		87.9161	0.635822	0.681551		4.29021	0.18597	0.299951	0.00988	0.915054	0.10382	0.00205		1691	42.3248	1691	32.1859	1693.5	36.4046	100
J07-PIC2-2010-080	2010/05/19		217.191	0.241079	0.237455		4.68403	0.19989	0.319884	0.01671	0.959276	0.106293	0.0016		1764	45.3993	1789	56.3685	1736.79	27.6012	101.417
J07-PIC2-2010-081	2010/05/19		725.703	0.202144	0.204797		4.29111	0.0817	0.302547	0.00879	0.915669	0.102986	0.00171		1692	17.8785	1704	27.4758	1678.62	30.6705	100.709
J07-PIC2-2010-085	2010/05/19		367.275	0.392717	0.389469		4.1963	0.13726	0.292784	0.01309	0.921503	0.103958	0.0024		1673	30.3602	1655	41.0688	1695.95	42.5501	98.9241
J07-PIC2-2010-086	2010/05/19		40.1812	0.659854	0.653995		4.27105	0.13719	0.293098	0.00987	0.838734	0.105858	0.00378		1688	30.0807	1657	30.9716	1729.27	65.5374	98.1635
J07-PIC2-2010-087	2010/05/19		166.094	0.607883	0.603543		4.35184	0.10991	0.302038	0.00661	0.885113	0.104385	0.00184		1703	25.9418	1701	22.4572	1703.51	32.4571	99.8826
J07-PIC2-2010-088	2010/05/19		164.754	0.580358	0.578195		3.27999	0.06391	0.25874	0.00534	0.90346	0.0918735	0.00122		1476	17.3504	1483	18.4859	1464.77	25.2259	100.474
J07-PIC2-2010-089	2010/05/19		170.166	0.55821	0.54593		4.39597	0.18504	0.305962	0.0138	0.937968	0.104303	0.00204		1712	41.6109	1721	44.8403	1702.05	36.0202	100.526
J07-PIC2-2010-090	2010/05/19		398.336	0.473769	0.472711		4.53514	0.08973	0.309033	0.00779	0.9194	0.106485	0.00148		1737	19.8506	1736	25.2986	1740.1	25.4746	99.9424
J07-PIC2-2010-091	2010/05/19		176.417	1.01595	1.00853		4.26114	0.16077	0.297094	0.01336	0.938826	0.104076	0.00193		1686	36.7315	1677	43.5598	1698.05	34.1695	99.4662
J07-PIC2-2010-092	2010/05/19		127.163	0.899738	0.904839		4.3483	0.16259	0.299332	0.01206	0.955689	0.105463	0.00127		1703	38.4041	1688	41.0187	1722.41	22.1207	99.1192
J07-PIC2-2010-093	2010/05/19		123.084	0.179198	0.177599		4.83635	0.15206	0.318156	0.01137	0.896509	0.110022	0.00281		1791	33.9612	1781	38.3934	1799.77	46.4673	99.4417
J07-PIC2-2010-094	2010/05/19		150.776	0.404477	0.427971		4.68994	0.19565	0.31122	0.01236	0.924305	0.109248	0.00226		1765	40.8469	1747	38.5213	1786.92	37.6967	98.9802
J07-PIC2-2010-098	2010/05/19		131.108	0.51732	0.523614		4.47136	0.18382	0.304109	0.00972	0.919556	0.106472	0.00191		1726	42.793	1712	33.0254	1739.87	32.881	99.1889
J07-PIC2-2010-099	2010/05/19		218.985	0.66895	0.677796		4.28717	0.1066	0.297095	0.00748	0.888525	0.104624	0.002		1691	24.2822	1677	24.3925	1707.72	35.1801	99.1721
J07-PIC2-2010-100	2010/05/19		138.398	0.247681	0.24933		4.28758	0.16852	0.291911	0.00997	0.878333	0.106551	0.00294		1691	36.8725	1651	31.2839	1741.24	50.5663	97.6345
J07-PIC2-2010-101	2010/05/19		238.137	0.620994	0.627133		4.74418	0.1825	0.319138	0.01087	0.902186	0.10779	0.00258		1775	39.426	1786	35.1578	1762.4	43.7489	100.62
J07-PIC2-2010-102	2010/05/19		131.148	0.574465	0.57832		3.24126	0.09201	0.254278	0.00771	0.918825	0.0924329	0.00148		1467	25.1166	1461	26.7247	1476.29	30.3695	99.591
J07-PIC2-2010-103	2010/05/19		98.8415	0.680069	0.699129		4.25461	0.19393	0.30208	0.01492	0.900993	0.102186	0.00352		1685	42.6076	1702	46.6434	1664.2	63.7458	101.009
J07-PIC2-2010-104	2010/05/19		208.322	0.299997	0.304364		4.86314	0.13599	0.322538	0.01909	0.92123	0.109598	0.00335		1796	30.2921	1802	64.323	1792.74	55.6596	100.334
J07-PIC2-2010-105	2010/05/19		275.491	0.542337	0.547462		4.24581	0.0967	0.294083	0.00635	0.940405	0.104682	0.00091		1683	22.1382	1662	20.7517	1708.74	15.996	98.7522
J07-PIC2-2010-106	2010/05/19		265.716	1.08974	1.1447		4.33625	0.18889	0.305242	0.01201	0.882718	0.102995	0.0034		1700	41.0826	1717	37.488	1678.78	60.9757	101
J07-PIC2-2010-107	2010/05/19		361.878	0.472483	0.471009		4.49266	0.18099	0.300825	0.01406	0.950192	0.108191	0.00166		1730	40.2424	1695	45.7709	1769.17	28.0207	97.9769
J07-PIC2-2010-111	2010/05/19		185.604	0.393239	0.40765		4.22288	0.15729	0.296459	0.01331	0.947663	0.103347	0.00164		1678	36.0892	1674	43.4028	1685.09	29.288	99.7616
J07-PIC2-2010-112	2010/05/19		224.717	0.408009	0.404449		4.4507	0.16821	0.304903	0.0093	0.945991	0.105921	0.00122		1722	39.2506	1716	31.5865	1730.36	21.1368	99.6516
J07-PIC2-2010-113	2010/05/19		97.2343	0.877384	0.877765		4.09203	0.16358	0.286514	0.01173	0.89716	0.103634	0.00289		1653	38.1563	1624	38.3935	1690.2	51.4349	98.2456
J07-PIC2-2010-114	2010/05/19		108.812	0.216916	0.217514		4.91167	0.14186	0.321626	0.01322	0.882062	0.110886	0.00365		1804	30.087	1798	42.6978	1813.98	59.7835	99.6674
J07-PIC2-2010-115	2010/05/19		55.0122	0.533481	0.529449		4.16559	0.20515	0.294789	0.0084	0.82002	0.102603	0.00368		1667	47.4027	1665	27.4197	1671.73	66.309	99.88
J07-PIC2-2010-116	2010/05/19		150.035	0.338542	0.344266		4.40988	0.11919	0.304725	0.01138	0.899239	0.104945	0.00268		1714	25.7027	1715	35.5424	1713.35	46.9641	100.058
J07-PIC2-2010-117	2010/05/19		127.833	0.291248	0.291608		4.86485	0.1041	0.320232	0.00636	0.896793	0.110193	0.00159		1796	22.1959	1791	20.5574	1802.59	26.243	99.7216
J07-PIC2-2010-118	2010/05/19		243.876	0.531584	0.562198		4.92856	0.19011	0.324459	0.01257	0.936158	0.110188	0.00193		1807	40.2471	1811	40.5144	1802.52	31.8564	100.221
J07-PIC2-2010-119	2010/05/19		127.016	0.654308	0.644764		4.26981	0.16812	0.299018	0.00931	0.878606	0.103568	0.00275		1688	36.8719	1686	29.1414	1689.03	48.9817	99.8815
J07-PIC2-2010-120	2010/05/19		183.457	0.520336	0.517066		4.0505	0.19512	0.289752	0.01182	0.933227	0.101318	0.00191		1644	47.7608	1640	40.3575	1648.41	34.9561	99.7567
J07-PIC2-2010-124	2010/05/19		193.367	0.256852	0.247077		4.58966	0.07453	0.310205	0.0081	0.879947	0.107348	0.00224		1747	17.1161	1742	27.4676	1754.88	38.1757	99.7138
J07-PIC2-2010-125	2010/05/19		70.6226	0.582458	0.566164		4.25829	0.13132	0.294646	0.00778	0.836907	0.104843	0.00305		1685	30.006	1665	25.4169	1711.56	53.5121	98.8131
J07-PIC2-2010-126	2010/05/19		294.732	0.639268	0.622405		4.19547	0.11982	0.299035	0.00892	0.922054	0.101695	0.00166		1673	28.818	1687	30.3598	1655.29	30.2414	100.837
J07-PIC2-2010-127	2010/05/19		332.282	0.454299	0.445335		4.09713	0.25784	0.287117	0.01853	0.930516	0.103505	0.00308		1654	57.7419	1627	58.274	1687.91	54.9006	98.3676
J07-PIC2-2010-128	2010/05/19		93.4256	1.27395	1.26065		14.6117	0.51644	0.542984	0.01724	0.899277	0.19519	0.00433		2790	56.94	2796	51.2832	2786.4	36.336	100.215
J07-PIC2-2010-129	2010/05/19		120.506	0.367651	0.356452		4.45992	0.10697	0.309108	0.0107	0.916395	0.10476	0.00208		1724	23.8801	1736	34.7295	1710.1	36.5291	100.696
J07-PIC2-2010-130	2010/05/19		303.741	0.413607	0.400326		4.63908	0.15073	0.318312	0.01223	0.937128	0.105739	0.00182		1756	31.6531	1781	37.9768	1727.2	31.5989	101.424
J07-PIC2-2010-131	2010/05/19		117.487	0.573419	0.559145		4.39674	0.14377	0.304195	0.0094	0.905168	0.104967	0.00215		1712	31.0582	1712	29.358	1713.74	37.6665	100
J07-PIC2-2010-132	2010/05/19		116.838	0.502498	0.489531		4.22468	0.10526	0.296575	0.01206	0.898665	0.10327	0.0028		1679	23.2117	1674	37.7863	1683.71	50.0501	99.7022
J07-PIC2-2010-133	2010/05/19		232.979	0.262413	0.255192		4.78891	0.10474	0.32021	0.00657	0.904343	0.108526	0.00152		1783	23.5223	1791	22.1773	1774.83	25.5603	100.449
J07-PIC2-2010-137	2010/05/19		519.076	0.22604	0.221441		4.39057	0.09748	0.30643	0.00785	0.937072	0.103917	0.00117		1711	21.0798	1723	24.4957	1695.22	20.7533	100.701
J07-PIC2-2010-138	2010/05/19		338.439	0.221587	0.218935		4.85074	0.10023	0.322934	0.0073	0.924379	0.108764	0.00132		1794	22.3601	1804	24.6163	1778.82	22.1377	100.557
J07-PIC2-2010-139	2010/05/19		272.354	0.224602	0.219606		4.96109	0.12914	0.327184	0.01	0.875091	0.110018	0.00297		1813	27.2539	1825	32.2307	1799.7	49.1154	100.662
J07-PIC2-2010-140	2010/05/19		66.0325	0.767052	0.761894		4.1015	0.13792	0.290991	0.01765	0.902947	0.102435	0.00387		1655	33.5652	1646	60.2395	1668.7	69.874	99.4562
J07-PIC2-2010-141	2010/05/19		285.523	0.894676	0.891908		4.18114	0.09227	0.280001	0.00779	0.937412	0.108303	0.00115		1670	22.2309	1591	26.7237	1771.06	19.3873	95.2695
J07-PIC2-2010-142	2010/05/19		195.424	0.482773	0.47345		5.30872	0.19071	0.335329	0.01656	0.900654	0.114904	0.00388		1870	37.2689	1864	51.0684	1878.38	60.8512	99.6791
J07-PIC2-2010-143	2010/05/19		445.199	0.349929	0.341836		11.5462	0.43668	0.494002	0.02958	0.937051	0.169675	0.00447		2568	53.8802	2588	85.9799	2554.44	44.1076	100.779
J07-PIC2-2010-144	2010/05/19		146.454	0.396154	0.389184		4.3448	0.18258	0.301519	0.0153	0.949225	0.104508	0.00183		1702	39.677	1699	47.8522	1705.68	32.2338	99.8237
J07-PIC2-2010-145	2010/05/19		95.8299	0.454751	0.446567		4.34642	0.15778	0.304464	0.01325	0.906515	0.103563	0.00293		1702	35.6767	1713	43.0645	1688.94	52.1908	100.646
J07-PIC2-2010-146	2010/05/19		72.7072	0.45765	0.445746		4.27152	0.16105	0.297827	0.01935	0.923681	0.104118	0.00336		1688	36.7496	1681	63.0619	1698.79	59.4571	99.5853
J07-PIC2-2010-150	2010/05/19		174.674	0.293761	0.28914		4.55714	0.11571	0.309544	0.00854	0.922559	0.106703	0.00158		1741	26.6641	1738	28.9278	1743.85	27.1276	99.8277
J07-PIC2-2010-151	2010/05/19		79.8097	0.372007	0.363355		4.51998	0.20755	0.307082	0.01509	0.929305	0.106828	0.00255		1735	44.1971	1726	47.0735	1745.99	43.7188	99.4813
J07-PIC2-2010-152	2010/05/19		117.836	0.584105	0.573785		4.20499	0.12126	0.295656	0.00689	0.820182	0.103094	0.00297		1675	27.8921	1670	22.4882	1680.56	53.2007	99.7015
J07-PIC2-2010-153	2010/05/19		136.08	0.417068	0.410489		5.15272	0.19043	0.331624	0.00933	0.853185	0.112699	0.00334		1845	37.8287	1846	28.8189	1843.39	53.6333	100.054
J07-PIC2-2010-154	2010/05/19		179.119	0.497541	0.487704		4.477	0.09213	0.307965	0.00686	0.939436	0.105473	0.00099		1727	21.4387	1731	23.2602	1722.57	17.2418	100.232
J07-PIC3-2010-007	2010/05/19		228.041	0.531271	0.527682		9.35651	0.21793	0.444721	0.00958	0.929249	0.152867	0.00167		2374	33.3956	2372	30.8924	2378	15.7517	99.9158
J07-PIC3-2010-008	2010/05/19		33.8474	0.948539	1.03705		5.06555	1.27744	0.354906	0.09668	0.987028	0.1042	0.00295		1830	307.666	1958	355.596	1700	32.1598	106.995
J07-PIC3-2010-009	2010/05/19		210.849	0.602452	0.592071		4.63458	0.2246	0.323872	0.01318	0.897524	0.104025	0.00328		1756	47.2261	1809	40.8681	1697	29.7626	103.018
J07-PIC3-2010-010	2010/05/19		456.803	0.476608	0.473111		4.51294	0.06753	0.311723	0.00584	0.902746	0.105207	0.00134		1733	15.0331	1749	18.972	1718	12.6692	100.923
J07-PIC3-2010-011	2010/05/19		250.099	0.349517	0.344314		4.69457	0.09811	0.322261	0.00581	0.915607	0.105846	0.00119		1766	22.2998	1801	19.664	1729	11.7886	101.982
J07-PIC3-2010-012	2010/05/19		341.075	0.385629	0.381194		4.77727	0.1281	0.321267	0.00806	0.938795	0.108083	0.00119		1781	27.6073	1796	26.0773	1767	11.348	100.842
J07-PIC3-2010-013	2010/05/19		267.47	0.570478	0.563769		12.0972	0.31358	0.503742	0.01562	0.934858	0.174525	0.00249		2612	39.1446	2630	47.1419	2602	21.4799	100.689
J07-PIC3-2010-014	2010/05/19		266.509	0.516369	0.508792		4.19742	0.10781	0.298353	0.0111	0.893158	0.102604	0.00275		1674	24.8589	1683	36.1915	1672	25.9431	100.538
J07-PIC3-2010-015	2010/05/19		288.598	0.244912	0.242658		4.22499	0.16359	0.299622	0.01068	0.93235	0.102416	0.00174		1679	36.0865	1689	33.4223	1668	15.7863	100.596
J07-PIC3-2010-016	2010/05/19		81.8421	0.389962	0.384754		4.33569	0.20327	0.303984	0.00964	0.822617	0.1038	0.00414		1700	48.0813	1711	32.7471	1693	40.7765	100.647
J07-PIC3-2010-020	2010/05/19		180.799	0.41248	0.400609		4.34131	0.10111	0.302092	0.00672	0.905495	0.104604	0.00153		1701	22.0168	1702	21.0521	1707	13.9235	100.059
J07-PIC3-2010-021	2010/05/19		140.231	0.439489	0.427337		4.48209	0.16684	0.311482	0.01091	0.883596	0.104936	0.00306		1728	37.1633	1748	35.3786	1713	28.8864	101.157
J07-PIC3-2010-022	2010/05/19		386.139	0.379765	0.368968		10.7303	0.38403	0.479077	0.01946	0.970989	0.16307	0.00137		2500	51.695	2523	59.2139	2488	12.1988	100.92
J07-PIC3-2010-023	2010/05/19		212.191	0.616633	0.674807		17.8264	0.36016	0.603029	0.01299	0.929045	0.215264	0.00229		2980	34.8384	3042	37.9267	2946	18.1482	102.081
J07-PIC3-2010-024	2010/05/19		152.234	0.444884	0.431621		4.81297	0.19227	0.323251	0.01196	0.9036	0.108555	0.00279		1787	41.2411	1806	38.6147	1775	26.3691	101.063
J07-PIC3-2010-025	2010/05/19		356.767	0.383533	0.372232		5.30421	0.21884	0.336579	0.01153	0.888139	0.114685	0.00315		1870	42.8213	1870	35.5674	1875	28.6115	100
J07-PIC3-2010-026	2010/05/19		220.232	0.303085	0.286867		4.68039	0.20658	0.317318	0.01147	0.901968	0.10732	0.00274		1764	44.9743	1777	37.1142	1754	25.9374	100.737
J07-PIC3-2010-027	2010/05/19		382.904	0.506873	0.493135		4.56085	0.14831	0.312381	0.01139	0.940524	0.106318	0.00161		1742	32.7335	1752	36.9209	1737	15.2899	100.574
J07-PIC3-2010-028	2010/05/19		250.993	0.446109	0.434241		4.26489	0.17413	0.300447	0.01068	0.91031	0.103343	0.00232		1687	38.2299	1694	33.4519	1685	21.0684	100.415
J07-PIC3-2010-029	2010/05/19		296.109	0.797571	0.785079		4.31042	0.1139	0.296317	0.00768	0.873687	0.10595	0.00233		1695	24.8813	1673	24.0901	1731	21.2129	98.7021
J07-PIC3-2010-033	2010/05/19		175.932	0.256937	0.251121		4.56261	0.14727	0.310251	0.01311	0.919238	0.107042	0.00249		1742	31.2195	1742	40.8682	1750	22.6236	100
J07-PIC3-2010-034	2010/05/19		806.716	0.410263	0.400968		4.54854	0.13834	0.316271	0.01146	0.949668	0.104704	0.00136		1740	31.9415	1771	38.7354	1709	13.4102	101.782
J07-PIC3-2010-035	2010/05/19		100.257	0.1973	0.194042		5.33255	0.16312	0.335515	0.01075	0.899274	0.115611	0.00261		1874	33.1294	1865	34.5619	1889	24.6963	99.5197
J07-PIC3-2010-036	2010/05/19		349.258	0.457069	0.446536		6.03538	0.21839	0.354272	0.00705	0.772922	0.123788	0.00385		1981	43.2556	1955	23.5366	2012	37.818	98.6875
J07-PIC3-2010-037	2010/05/19		202.02	0.660216	0.64651		2.64895	0.17059	0.2091	0.00907	0.820843	0.0922104	0.00391		1314	48.8669	1224	30.6924	1472	36.054	93.1507
J07-PIC3-2010-038	2010/05/19		145.673	0.443493	0.434899		4.30886	0.13369	0.299004	0.00783	0.907466	0.104818	0.00176		1695	30.3925	1686	25.5559	1711	16.661	99.469
J07-PIC3-2010-039	2010/05/19		68.9219	0.760431	0.743021		3.23412	0.12549	0.254251	0.0085	0.838164	0.0926425	0.00328		1465	32.8399	1460	28.2051	1481	30.2848	99.6587
J07-PIC3-2010-040	2010/05/19		135.484	0.325804	0.317576		4.37635	0.15636	0.301614	0.01291	0.922774	0.105633	0.00236		1708	33.8773	1699	40.3839	1725	21.4288	99.4731
J07-PIC3-2010-041	2010/05/19		58.1125	0.910796	0.895883		3.20113	0.10302	0.251537	0.00906	0.901137	0.0926574	0.00211		1457	26.0365	1446	28.9392	1481	18.7794	99.245
J07-PIC3-2010-042	2010/05/19		295.411	0.519938	0.509145		4.84286	0.206	0.319508	0.01437	0.948198	0.110334	0.00178		1792	42.3065	1787	44.6175	1805	16.2425	99.721
J07-PIC3-2010-046	2010/05/19		250.865	0.188091	0.180576		4.6142	0.07674	0.311117	0.00573	0.902094	0.107653	0.00134		1752	16.8804	1746	18.6335	1760	12.7469	99.6575
J07-PIC3-2010-047	2010/05/19		147.407	0.454483	0.446464		5.13764	0.08037	0.332078	0.00388	0.850996	0.112254	0.00141		1842	18.2826	1848	13.7404	1836	14.6581	100.326
J07-PIC3-2010-048	2010/05/19		138.964	0.446115	0.435952		4.31927	0.13689	0.300643	0.00638	0.847824	0.104417	0.00237		1697	31.0805	1694	20.8071	1704	22.408	99.8232
J07-PIC3-2010-049	2010/05/19		357.938	0.490523	0.49097		4.488	0.15062	0.312766	0.00973	0.941503	0.104157	0.00137		1729	33.5299	1754	31.5515	1699	13.0043	101.446
J07-PIC3-2010-050	2010/05/19		50.5966	0.654465	0.644028		3.09079	0.16538	0.248312	0.00759	0.797591	0.0903913	0.00369		1430	42.459	1430	24.2909	1434	32.5293	100
J07-PIC3-2010-051	2010/05/19		209.454	0.976521	0.969575		12.5021	0.74211	0.509057	0.02763	0.956924	0.17813	0.00294		2643	94.6281	2653	86.858	2636	26.3484	100.378
J07-PIC3-2010-052	2010/05/19		219.337	0.535692	0.524386		11.2628	0.2835	0.488354	0.01124	0.947028	0.167408	0.00147		2545	38.6816	2564	35.6551	2532	13.5207	100.747
J07-PIC3-2010-053	2010/05/19		196.827	0.695824	0.678548		3.04689	0.10748	0.241551	0.00854	0.918668	0.0914941	0.00165		1419	28.9224	1395	28.5127	1457	15.2191	98.3087
J07-PIC3-2010-054	2010/05/19		149.219	0.364786	0.356357		4.3836	0.10032	0.304051	0.00673	0.8932	0.104654	0.00173		1709	22.6216	1711	21.9081	1708	16.3936	100.117
J07-PIC3-2010-055	2010/05/19		371.261	0.230037	0.225701		4.90605	0.09898	0.325633	0.00787	0.961772	0.109323	0.00071		1803	21.982	1817	26.5292	1788	7.053	100.776
J07-PIC3-2010-059	2010/05/19		131.873	0.533082	0.532683		4.65782	0.15006	0.310863	0.01382	0.941206	0.108695	0.0019		1760	31.4825	1745	43.0812	1778	17.2721	99.1477
J07-PIC3-2010-060	2010/05/19		157.902	0.447455	0.447606		5.10707	0.19734	0.332562	0.01091	0.929222	0.111403	0.00188		1837	39.4006	1851	33.7226	1822	17.1106	100.762
J07-PIC3-2010-061	2010/05/19		108.241	1.09212	1.09347		4.72532	0.1539	0.315187	0.0109	0.9356	0.108701	0.00168		1772	32.0451	1766	33.9288	1778	15.2955	99.6614
J07-PIC3-2010-062	2010/05/19		263.078	0.624217	0.621087		3.2434	0.05881	0.257965	0.00969	0.88845	0.0914312	0.00235		1468	15.4117	1479	32.1203	1456	21.7042	100.749
J07-PIC3-2010-063	2010/05/19		277.344	0.382843	0.384624		4.4029	0.17703	0.300807	0.0155	0.934165	0.106097	0.0024		1713	38.2288	1695	48.4948	1733	21.7722	98.9492
J07-PIC3-2010-064	2010/05/19		112.835	0.513068	0.505825		4.5574	0.17556	0.318557	0.0146	0.945986	0.103769	0.00186		1742	38.7688	1783	47.2279	1693	17.6302	102.354
J07-PIC3-2010-065	2010/05/19		354.598	0.529816	0.530042		4.50698	0.10588	0.309697	0.01156	0.936017	0.105556	0.0017		1732	24.5739	1739	39.1743	1724	16.7726	100.404
J07-PIC3-2010-066	2010/05/19		267.285	0.599265	0.597693		3.14353	0.07968	0.253416	0.00616	0.914789	0.0900169	0.00125		1443	21.149	1456	20.4955	1426	11.4637	100.901
J07-PIC3-2010-067	2010/05/19		136.224	0.423383	0.424266		4.7912	0.10144	0.320036	0.0104	0.93067	0.108587	0.00167		1783	21.8409	1790	33.6292	1776	15.8518	100.393
J07-PIC3-2010-068	2010/05/19		135.265	0.368126	0.366933		4.90996	0.15908	0.323522	0.01472	0.92516	0.110145	0.00258		1804	32.4536	1807	45.6338	1802	23.4528	100.166
J07-PIC3-2010-072	2010/05/19		78.3847	1.48648	1.47961		7.43585	0.29859	0.39872	0.01595	0.94029	0.13531	0.00232		2165	48.2537	2163	48.0529	2168	20.6998	99.9076
J07-PIC3-2010-073	2010/05/19		220.193	0.447548	0.445068		4.51602	0.12123	0.31019	0.01031	0.931743	0.105605	0.00166		1734	26.9097	1742	33.4567	1725	15.7092	100.461
J07-PIC3-2010-074	2010/05/19		187.635	0.267848	0.266687		4.54555	0.16058	0.311284	0.01003	0.882833	0.105942	0.00284		1739	35.4965	1747	32.5522	1731	26.8082	100.46
J07-PIC3-2010-075	2010/05/19		84.9688	0.30279	0.301858		4.34278	0.14217	0.300875	0.00957	0.8853	0.104715	0.00264		1702	32.1966	1696	31.1796	1709	24.935	99.6475
J07-PIC3-2010-076	2010/05/19		140.879	0.361812	0.359799		4.47855	0.18233	0.302948	0.01381	0.926477	0.10722	0.00242		1727	39.0247	1706	43.1791	1753	21.9988	98.784
J07-PIC3-2010-077	2010/05/19		207.92	0.497792	0.495648		4.58139	0.11898	0.310203	0.00824	0.907545	0.107124	0.00183		1746	27.3792	1742	27.9691	1751	18.0775	99.7709
J07-PIC3-2010-078	2010/05/19		283.307	0.321055	0.319744		4.44899	0.13032	0.308688	0.00992	0.920492	0.104423	0.00188		1722	30.4471	1734	33.6448	1704	18.5288	100.697
J07-PIC3-2010-079	2010/05/19		210.024	0.702376	0.70759		4.70912	0.1382	0.317976	0.00857	0.844035	0.107356	0.00321		1769	30.0067	1780	27.7616	1755	30.3392	100.622
J07-PIC3-2010-080	2010/05/19		110.57	0.504455	0.502819		4.48751	0.18258	0.306284	0.01111	0.888128	0.106334	0.00301		1729	39.0462	1722	34.6852	1737	27.3612	99.5951
J07-PIC3-2010-081	2010/05/19		101	0.478803	0.476828		4.65693	0.11008	0.313701	0.00983	0.931556	0.107651	0.00158		1760	26.3499	1759	34.9203	1760	16.3726	99.9432
J07-PIC3-2010-085	2010/05/19		452.158	0.260503	0.259192		4.27586	0.15856	0.297222	0.01046	0.949021	0.104313	0.00128		1689	34.7683	1678	32.7879	1702	11.6761	99.3487
J07-PIC3-2010-086	2010/05/19		179.186	0.285959	0.284895		4.73401	0.13693	0.316151	0.0112	0.921989	0.108464	0.00207		1773	29.6412	1771	36.2498	1774	19.6569	99.8872
J07-PIC3-2010-087	2010/05/19		72.9252	0.16316	0.161888		4.80842	0.13124	0.318073	0.00865	0.863303	0.109708	0.00284		1786	27.077	1780	26.9135	1795	25.8452	99.6641
J07-PIC3-2010-088	2010/05/19		94.1507	0.252436	0.251483		4.90246	0.28215	0.324626	0.01768	0.958823	0.109376	0.00175		1803	59.9286	1812	57.0206	1789	16.5685	100.499
J07-PIC3-2010-089	2010/05/19		84.1492	0.422804	0.444938		4.8189	0.13847	0.327716	0.00988	0.926449	0.10661	0.00174		1788	28.535	1827	30.6147	1742	15.8416	102.181
J07-PIC3-2010-090	2010/05/19		205.382	0.452665	0.450163		4.68705	0.0872	0.316383	0.00519	0.915819	0.10741	0.00106		1765	19.0086	1772	16.8634	1756	10.0712	100.397
J07-PIC3-2010-091	2010/05/19		188.625	0.417103	0.415397		4.39041	0.08233	0.305568	0.00724	0.89915	0.104225	0.00172		1711	19.3958	1719	24.6053	1701	17.0434	100.468
J07-PIC3-2010-092	2010/05/19		154.05	0.317365	0.31553		4.9218	0.12418	0.324151	0.00723	0.905516	0.110188	0.00166		1806	25.3154	1810	22.4585	1803	15.1463	100.221
J07-PIC3-2010-093	2010/05/19		146.645	0.261771	0.260835		4.68536	0.08173	0.321269	0.00506	0.829844	0.105818	0.00206		1765	17.8295	1796	16.4204	1729	19.5074	101.756
J07-PIC3-2010-094	2010/05/19		166.061	0.662416	0.659885		3.32487	0.11724	0.261034	0.01225	0.917805	0.0924669	0.00233		1487	30.2963	1495	40.5494	1477	21.555	100.538
J07-PIC3-2010-098	2010/05/19		759.219	0.284751	0.278013		3.74802	0.34538	0.258322	0.02558	0.954289	0.105232	0.00278		1582	80.8748	1481	81.3757	1718	25.2709	93.6157
J07-PIC3-2010-099	2010/05/19		164.354	0.784675	0.774965		3.11131	0.06394	0.239957	0.00686	0.902759	0.0939614	0.00154		1435	17.8187	1386	23.9438	1507	14.9349	96.5854
J07-PIC3-2010-100	2010/05/19		302.032	0.339743	0.336341		5.50731	0.20858	0.352904	0.01289	0.933871	0.113191	0.00206		1902	41.6166	1948	41.1312	1851	19.4778	102.419
J07-PIC3-2010-101	2010/05/19		223.304	0.332577	0.336511		4.46508	0.07064	0.308648	0.0069	0.864152	0.104844	0.00218		1725	15.8153	1734	22.4509	1712	20.622	100.522
J07-PIC3-2010-102	2010/05/19		142.418	0.384053	0.378644		4.62785	0.10097	0.312808	0.00741	0.894468	0.107225	0.00187		1754	21.2732	1755	23.1067	1753	16.9822	100.057
J07-PIC3-2010-103	2010/05/19		252.621	0.379384	0.373738		4.55998	0.15534	0.318416	0.01309	0.940389	0.103896	0.00184		1742	35.8109	1782	44.2279	1695	18.1634	102.296
J07-PIC3-2010-104	2010/05/19		110.91	0.31085	0.306025		4.63335	0.13815	0.314477	0.00901	0.921738	0.106814	0.0017		1755	30.2436	1763	29.1954	1746	16.09	100.456
J07-PIC3-2010-105	2010/05/19		178.009	0.747343	0.73653		4.63396	0.15823	0.317371	0.01336	0.938426	0.105907	0.00194		1755	33.2701	1777	41.5417	1730	17.6492	101.254
J07-PIC3-2010-106	2010/05/19		133.393	0.510178	0.468089		3.73929	0.35757	0.299668	0.0222	0.933627	0.0903885	0.00356		1580	87.2413	1690	72.3238	1434	32.621	106.962
J07-PIC3-2010-111	2010/05/19		299.278	0.542331	0.538782		9.01176	0.44364	0.436983	0.01799	0.954186	0.149445	0.00203		2339	63.8984	2337	53.4249	2340	17.7491	99.9145
J07-PIC3-2010-112	2010/05/19		114.753	0.355524	0.351604		4.37158	0.12598	0.299068	0.00886	0.904982	0.106089	0.00202		1707	29.6945	1687	30.1812	1733	19.9592	98.8284
J07-PIC3-2010-113	2010/05/19		268.188	0.311125	0.306317		4.77876	0.18844	0.320653	0.01194	0.944374	0.108113	0.0016		1781	40.5723	1793	38.6	1768	15.1724	100.674
J07-PIC3-2010-114	2010/05/19		221.327	0.32972	0.326382		4.48805	0.08644	0.310612	0.00809	0.893894	0.104802	0.00201		1729	20.1274	1744	27.4399	1711	19.874	100.868
J07-PIC3-2010-115	2010/05/19		103.405	0.444189	0.440672		4.53127	0.09063	0.311366	0.0106	0.92396	0.10548	0.00184		1737	19.3192	1747	33.0218	1723	16.7297	100.576
J07-PIC3-2010-116	2010/05/19		293.646	0.554437	0.549552		3.14262	0.12061	0.248778	0.00887	0.907126	0.0916455	0.00197		1443	30.7425	1432	28.3705	1460	17.5016	99.2377
J07-PIC3-2010-117	2010/05/19		133.653	0.34252	0.339156		4.85037	0.12147	0.321807	0.00985	0.924196	0.109341	0.00177		1794	25.9775	1799	31.844	1788	16.7819	100.279
J07-PIC3-2010-118	2010/05/19		197.612	0.438325	0.432296		4.59701	0.13367	0.314211	0.01076	0.933718	0.106328	0.00169		1749	29.3944	1761	34.8594	1737	16.0317	100.686
J07-PIC3-2010-119	2010/05/19		220.816	0.51535	0.508926		4.4095	0.13741	0.31015	0.00851	0.931933	0.103058	0.0014		1714	30.8667	1741	27.6317	1680	13.2273	101.575
J07-PIC3-2010-120	2010/05/19		63.214	0.331654	0.328792		4.45169	0.22907	0.311992	0.00937	0.813205	0.103484	0.00425		1722	49.1711	1751	29.2245	1688	38.4788	101.684
J07-PIC3-2010-124	2010/05/19		484.836	0.484041	0.453469		3.3196	0.12622	0.265059	0.01008	0.924348	0.090821	0.00181		1486	32.6434	1516	33.3124	1443	16.6698	102.019
J07-PIC3-2010-125	2010/05/19		149.245	0.494981	0.493269		4.61802	0.32799	0.311733	0.02112	0.955046	0.107334	0.00228		1753	69.0777	1749	65.7597	1755	20.7	99.7718
J07-PIC3-2010-126	2010/05/19		367.059	0.359689	0.361248		4.63092	0.15102	0.3147	0.00937	0.908722	0.106683	0.00207		1755	33.0721	1764	30.3854	1743	19.5809	100.513
J07-PIC3-2010-127	2010/05/19		96.1158	1.00738	1.00229		3.07756	0.22846	0.248823	0.01206	0.861999	0.0897403	0.00405		1427	63.8915	1432	41.9029	1420	38.6944	100.35
J07-PIC3-2010-128	2010/05/19		344.394	0.512687	0.511206		3.19281	0.16244	0.255902	0.01157	0.908418	0.0905084	0.00254		1455	41.078	1469	36.8896	1436	22.366	100.962
J07-PIC3-2010-129	2010/05/19		132.874	0.312729	0.312357		4.69035	0.18796	0.315248	0.0127	0.953302	0.107893	0.00142		1766	40.8832	1766	41.1157	1764	13.4874	100
J07-PIC3-2010-130	2010/05/19		265.406	0.307809	0.307379		4.51638	0.15127	0.311178	0.01185	0.963556	0.105255	0.00102		1734	33.5604	1746	38.435	1719	9.67686	100.692
J07-PIC3-2010-131	2010/05/19		54.9952	0.461009	0.461154		4.49205	0.19103	0.309861	0.0174	0.947405	0.105199	0.00214		1730	42.4977	1740	56.4331	1718	20.2508	100.578
J07-PIC3-2010-132	2010/05/19		105.047	0.240498	0.240284		3.12519	0.16399	0.250348	0.01208	0.892995	0.0904003	0.00309		1439	43.6104	1440	40.1554	1434	28.3666	100.069
J07-PIC3-2010-133	2010/05/19		88.3515	0.344701	0.344499		4.48272	0.21879	0.30952	0.01218	0.89416	0.105081	0.00314		1728	48.7137	1738	39.5209	1716	29.6544	100.579
J07-PIC3-2010-137	2010/05/19		143.786	0.468547	0.4603		4.79788	0.24198	0.319489	0.01801	0.943113	0.108948	0.00244		1785	49.9569	1787	55.8972	1782	22.159	100.112
J07-PIC3-2010-138	2010/05/19		331.087	0.364736	0.358223		4.80245	0.1639	0.322187	0.01259	0.943822	0.108079	0.00168		1785	36.7631	1800	42.4707	1767	16.6471	100.84
J07-PIC3-2010-139	2010/05/19		213.369	0.491371	0.482549		4.61712	0.12659	0.317859	0.01845	0.922917	0.105404	0.00315		1752	28.9993	1779	62.2948	1721	31.0847	101.541
J07-PIC3-2010-140	2010/05/19		177.772	0.355504	0.347883		4.3805	0.20196	0.303061	0.01734	0.934158	0.104814	0.00269		1709	43.7282	1706	54.183	1711	24.4542	99.8245
J07-PIC3-2010-141	2010/05/19		587.56	0.443972	0.413144		2.31217	0.14072	0.187192	0.01426	0.894031	0.0897621	0.00351		1216	44.6386	1106	50.8283	1420	33.5685	90.9539
J07-PIC3-2010-142	2010/05/19		278.414	0.345145	0.336461		5.21681	0.17712	0.332581	0.01444	0.946938	0.113795	0.00181		1855	36.3925	1851	46.4315	1861	17.1413	99.7844
J07-PIC3-2010-143	2010/05/19		263.8	0.496889	0.487895		4.48307	0.13448	0.309447	0.01038	0.964143	0.105048	0.00088		1728	31.2887	1738	35.1903	1715	8.76926	100.579
J07-PIC3-2010-144	2010/05/19		950.932	0.458753	0.441396		4.47545	0.14737	0.315069	0.01133	0.929902	0.103068	0.00189		1726	31.5556	1766	35.2568	1680	17.1799	102.317
J07-PIC3-2010-145	2010/05/19		42.1214	0.391042	0.391451		4.41897	0.2888	0.306862	0.01635	0.851837	0.104421	0.00586		1716	64.7644	1725	53.1122	1704	55.2379	100.524
J07-PIC3-2010-146	2010/05/19		189.429	0.562248	0.552383		4.58917	0.19137	0.310902	0.01266	0.895753	0.107247	0.00318		1747	42.0841	1745	41.0531	1753	30.04	99.8855
J07-PIC3-2010-150	2010/05/19		213.751	0.271209	0.263876		4.29833	0.13024	0.299731	0.00722	0.903954	0.104017	0.00169		1693	29.6479	1690	23.5553	1697	16.0001	99.8228
J07-PIC3-2010-151	2010/05/19		52.163	0.385776	0.373847		4.44602	0.17267	0.303775	0.00843	0.828617	0.105888	0.0035		1721	40.3281	1710	28.6606	1730	34.588	99.3608
J07-PIC3-2010-152	2010/05/19		99.4915	0.464018	0.451251		4.33908	0.09363	0.301022	0.0094	0.856727	0.104615	0.00312		1701	21.2348	1696	30.6086	1708	29.4522	99.7061
J07-PIC3-2010-153	2010/05/19		239.217	0.436371	0.432353		4.37601	0.14638	0.302052	0.00874	0.919797	0.105091	0.0017		1708	31.7203	1701	27.3541	1716	15.4697	99.5902
J07-PIC3-2010-154	2010/05/19		213.933	0.354737	0.344739		4.33797	0.12507	0.299505	0.01451	0.922499	0.105105	0.00257		1701	28.3477	1689	47.2889	1716	24.2404	99.2945
