# Supplementary material for: Virtual mapping and analytical data integration: A teaching module using Precambrian crystalline basement in Colorado's Front Range (USA)
Source: Copernicus journal article supplement (doi:10.5194/gc-2021-9), 2021-05-05
Supplement: Supplementary file 126 [file McCoy01mnzISRsz.xlsx]

## Sheet: Sheet1
Note: This spreadsheet is a subset of data provided in the McCoy (2001) MSc thesis. A. McCoy was kind enough to provide an excel spreadsheet with this data to Mahan. Contact Mahan (kevin.mahan@colorado.edu) if you would like a copy of the full spreadsheet, which also includes data from the Gore Range and St Louis Lake shear zones.
											Extra comments from Mahan (4/8/21)
K00IS1 - Xbiotite schist from Chicago Creek, S3 southeast side up phyllonite, strike,dip of 265,72N and L3 lin trend,plunge of 32->062.											This is the sample from which all grains with Xray maps are shown in Plate 1 e, f, and g from McCoy et al. (2005), which are the same figures as Fig. 20c, d, and f in McCoy (2001, MSc thesis).
monazite grain m5											grain map shown in Plate 1e (McCoy et al., 2005) and Fig. 20d (McCoy, 2001, MSc thesis).
Sample	Wt % Y	Wt % U	Wt % Th	Wt % Pb	Age (Ma)	Excluded data	Domain		Statistics
K00IS1m5.1	1.3253	0.3512	2.6667	0.2948	1610		core		K00IS1m5
K00IS1m5.2	2.5245	0.8453	3.0666	0.4671	1635		core			core
K00IS1m5.3	2.0916	0.9539	2.8271	0.4074	1416		rim		mean	1622.75
K00IS1m5.4	0.9708	0.4229	1.9649	0.1252	808	off edge of grain			stdev	12.4068
K00IS1m5.5	1.9142	0.8027	3.0912	0.4521	1622		core		sterr	4.38646
K00IS1m5.6	1.9236	0.7958	2.8647	0.38	1440		rim		count	8
K00IS1m5.b1	1.9013	0.8888	2.8468	0.3989	1434		rim			rim
K00IS1m5.b2	2.0044	0.8164	3.033	0.3826	1394		rim		mean	1421
K00IS1m5.b3	1.6547	0.4611	2.9889	0.3362	1556	on domain bndary			stdev	20.6882
K00IS1m5.b4	1.3161	0.5908	3.0296	0.3684	1542	on domain bndary			sterr	10.3441
K00IS1m5.b5	2.1017	0.8184	2.9162	0.4134	1521	on domain bndary			count	4
K00IS1m5.b6	2.5477	0.4882	3.0352	0.3676	1636		core
K00IS1m5.b7	1.2788	0.3465	2.7266	0.2966	1603		core
K00IS1m5.b8	1.4577	0.4105	3.2276	0.346	1581	on domain bndary
K00IS1m5.b9	1.6202	0.4851	4.3056	0.4207	1502	on domain bndary
K00IS1m5.b10	1.3672	0.3339	3.0743	0.3093	1557	on domain bndary
K00IS1m5.b11	2.6547	0.5248	2.992	0.3747	1636		core
K00IS1m5.b12	2.442	0.9563	2.8939	0.4802	1622		core
K00IS1m5.b13	2.493	0.8723	3.2035	0.4729	1598	on domain bndary
K00IS1m5.b14	2.4264	1.0542	3.2579	0.5166	1575	on domain bndary
K00IS1m5.b15	1.2789	0.8832	2.6419	0.4151	1542	on domain bndary
K00IS1m5.b16	1.1853	0.6779	1.8953	0.3269	1618		core
monazite grain m14											grain map shown in Plate 1g (McCoy et al., 2005) and Fig. 20c (McCoy, 2001, MSc thesis).
Sample	Wt % Y	Wt % U	Wt % Th	Wt % Pb	Age (Ma)	Excluded data	Domain		Statistics
K00IS1m14.1	2.0686	1.0656	3.0682	0.4506	1422		core		K00IS1m14
K00IS1m14.2	1.6421	1.0711	3.078	0.4387	1384		rim			core
K00IS1m14.3	1.5543	0.9701	2.8781	0.3964	1363		rim		mean	1418.2
K00IS1m14.4	0.5001	0.5215	1.5203	0.0553	379	off edge of grain			stdev	8.14862
K00IS1m14.b1	1.9176	0.931	3.1424	0.424	1421		core		sterr	2.57682
K00IS1m14.b2	1.932	0.9213	3.2755	0.4275	1412		core		count	10
K00IS1m14.b3	2.0236	1.0977	3.2446	0.4699	1422		core			rim
K00IS1m14.b4	2.0818	1.2799	3.1805	0.5103	1428		core		mean	1373.5
K00IS1m14.b5	2.0401	0.9656	3.2368	0.4386	1420		core		stdev	14.8492
K00IS1m14.b6	2.0909	0.8942	3.3278	0.4304	1428		core		sterr	10.5
K00IS1m14.b7	2.0566	0.8442	3.4536	0.4199	1407		core		count	2
K00IS1m14.b8	2.2296	0.842	3.3956	0.4197	1418		core
K00IS1m14.b9	0.3373	0.7232	1.064	0.1148	729	off edge of grain
K00IS1m14.b10	0.8667	0.6341	2.0294	0.2102	1088	off edge of grain
K00IS1m14.b11	1.9497	0.7601	3.3014	0.3897	1404		core
monazite grain m1
K00IS1m1.1	1.3649	0.3555	2.0618	0.2692	1715
monazite grain m2
K00IS1m2.1	1.3904	0.4116	2.3033	0.3093	1739
K00IS1m2.2	1.3337	0.3649	2.099	0.2784	1735
monazite grain m4
K00IS1m4.1	1.5697	1.5716	3.5654	0.7354	1703		core		K00IS1m4
K00IS1m4.2	1.7469	1.2092	3.3439	0.6034	1677		rim			core
K00IS1m4.3	1.4536	0.5534	1.9361	0.2123	1191	on fracture			mean	1693.8
K00IS1m4.4	2.0947	0.8298	2.4242	0.3895	1549	on fracture			stdev	7.94984
K00IS1m4.5	2.4217	0.7222	3.3435	0.4656	1672		rim		sterr	3.55528
K00IS1m4.b1	1.3631	1.3014	3.1962	0.5841	1597	on domain bndary			count	5
K00IS1m4.b2	1.3116	0.3475	2.4126	0.2876	1677		rim			rim
K00IS1m4.b3	1.2825	0.3901	2.8869	0.3401	1694		core		mean	1673.17
K00IS1m4.b4	1.7746	1.1965	3.5093	0.6155	1684		core		stdev	12.2216
K00IS1m4.b5	2.1183	0.5676	3.0088	0.3973	1677		rim		sterr	4.98943
K00IS1m4.b6	2.109	0.5849	2.9893	0.4067	1700		core		count	6
K00IS1m4.b7	1.4307	0.7844	3.1276	0.4697	1688		core
K00IS1m4.b8	2.1827	0.5369	2.8324	0.3686	1650		rim
K00IS1m4.b9	1.7682	0.2745	3.1521	0.2542	1330	off edge of grain
K00IS1m4.b10	2.4254	0.6002	3.2145	0.4254	1686		rim
K00IS1m4.b11	2.1303	0.6401	2.8726	0.3842	1597	off edge of grain
monazite grain m8											grain map shown in Plate 1f (McCoy et al., 2005) and Fig. 20e (McCoy, 2001, MSc thesis).
Sample	Wt % Y	Wt % U	Wt % Th	Wt % Pb	Age (Ma)	Excluded data	Domain		Statistics
K00IS1m8.1	1.2809	0.3703	2.004	0.2653	1695		core		K00IS1m8
K00IS1m8.2	1.4345	0.3883	2.6495	0.3226	1701		core			core
K00IS1m8.3	1.3116	0.356	1.9963	0.2617	1701		core		mean	1691.88
K00IS1m8.4	1.4699	0.4363	3.1391	0.3736	1696		core		stdev	14.3242
K00IS1m8.5	1.9706	0.8145	3.1057	0.4821	1702		core		sterr	3.58106
K00IS1m8.6	2.206	0.6062	3.1439	0.4203	1683		core		count	16
K00IS1m8.7	2.0608	0.7388	3.0649	0.3752	1423		rim			intermediate
K00IS1m8.8	1.9284	0.7549	2.9248	0.3709	1428		rim		mean	1653.33
K00IS1m8.9	2.0489	0.492	3.0377	0.3868	1712		core		stdev	13.4412
K00IS1m8.10	1.8255	1.8064	2.7832	0.6988	1618	on domain boundary			sterr	5.48736
K00IS1m8.11	2.6312	0.7379	2.92	0.4497	1713		core		count	6
K00IS1m8.12	2.232	0.7535	2.8764	0.386	1492	on domain boundary				rim
K00IS1m8.b1	2.2337	0.5571	3.1624	0.4135	1703		core		mean	1415
K00IS1m8.b2	1.9706	0.7789	3.1238	0.4639	1672		core		stdev	18.3576
K00IS1m8.b3	2.095	0.8891	3.419	0.5173	1670		core		sterr	10.5987
K00IS1m8.b4	1.9752	0.7987	3.1843	0.4796	1689		core		count	3
K00IS1m8.b5	2.0554	0.5058	3.119	0.3894	1681		core
K00IS1m8.b6	1.8009	1.985	2.8649	0.7691	1647		intermed
K00IS1m8.b7	1.7894	1.9094	2.859	0.7534	1658		intermed
K00IS1m8.b8	2.7075	0.6888	2.8948	0.4201	1664		intermed
K00IS1m8.b9	1.3914	0.3669	2.7248	0.317	1675		core
K00IS1m8.b10	1.2888	0.3816	2.4876	0.3024	1674		core
K00IS1m8.b11	1.6931	1.5294	2.6199	0.6491	1703		core
K00IS1m8.b12	2.4559	0.6621	2.9905	0.4178	1658		intermed
K00IS1m8.b13	1.4917	0.8588	2.7623	0.4553	1664		intermed
K00IS1m8.b14	2.2924	0.5497	3.0799	0.3856	1629		intermed
K00IS1m8.b15	2.1012	0.7966	3.1534	0.4146	1489	on domain boundary
K00IS1m8.b16	2.0883	0.7592	3.1687	0.3784	1394		rim
K00IS1m8.b17	0.2561	0.3801	0.939	0.1396	1335	off edge of grain
monazite grain m9
K00IS1m9.1	1.9818	0.8965	3.455	0.5132	1645
K00IS10 - Xquartzite- from Deer Creek, S3 southeast side down mylonite, strike,dip of 077,86S and L3 lin trend,plunge of 70->210
Sample	Wt % Y	Wt % U	Wt % Th	Wt % Pb	Age (Ma)	Excluded data	Domain		Statistics
monazite grain m2
K00IS10m2.1	1.3004	2.3907	7.1765	1.003	1395		one domain		K00IS10multi
K00IS10m2.2	1.2844	1.0072	5.9405	0.6108	1395		one domain		mean	1384.14
K00IS10m2.3	0.5174	1.2698	3.9424	0.538	1389		one domain		stdev	14.2173
monazite grain m3									sterr	3.79974
K00IS10m3.1	1.0432	0.8863	1.6471	0.3107	1406		one domain		count	14
K00IS10m3.2	0.9793	0.8206	1.6826	0.287	1360		one domain
K00IS10m3.3	1.0818	1.0379	1.8329	0.3508	1383		one domain
monazite grain m4
K00IS10m4.1	1.2678	1.9054	10.1618	1.0666	1374		one domain
K00IS10m4.2	1.1729	3.3013	11.9345	1.4918	1376		one domain
monazite grain m5
K00IS10m5.1	1.1422	3.6657	6.5762	1.2411	1383		one domain
K00IS10m5.2	1.1715	2.0145	5.5184	0.8208	1409		one domain
K00IS10m5.3	0.9604	0.7533	4.5431	0.4526	1365		one domain
monazite grain m7
K00IS10m7.1	1.0586	3.0707	8.8856	1.2608	1390		one domain
K00IS10m7.2	0.9274	1.1485	12.7217	1.0604	1376		one domain
K00IS10m7.3	0.7577	1.1548	10.5305	0.9245	1377		one domain
K00IS9 - Boulder Creek granodiorite with S3 SE-side down mylonite from Deer Creek with strike,dip of myl fol. 260,87N and lin trend,plunge of 68->267
monazite grain m1
K00IS9m1.1	0.6652	0.0567	4.0125	0.2417	1249		one domain
monazite grain m2
K00IS9m2.1	1.3482	0.126	6.6777	0.4324	1318		one domain		K00IS9m2
K00IS9m2.2	1.1447	0.0736	4.8179	0.3109	1327		one domain		mean	1317.33
K00IS9m2.3	1.0546	0.0836	4.6951	0.3006	1307		one domain		stdev	10.0167
monazite grain m3									sterr	5.78312
K00IS9m3.1	1.083	0.1766	7.2016	0.4725	1313		one domain		count	3
K00IS9m3.2	1.0344	0.0831	4.7549	0.2952	1270		one domain
K00IS9m3.3	0.7292	0.0294	3.5928	0.2123	1248		one domain		K00IS9m3
									mean	1277
monazite grain m4									stdev	33.0606
K00IS9m5.1	1.4726	0.3783	12.4913	0.8516	1340		one domain		sterr	19.0875
K00IS9m5.2	1.364	0.1557	6.1506	0.4107	1330		one domain		count	3
AA00GG5 - pelitic schist from Deer Creek with an S1 (a/b) foliation strike,dip of 035,25E and L1 trend,plunge of 17->178
Sample	Wt % Y	Wt % U	Wt % Th	Wt % Pb	Age (Ma)	Excluded data	Domain		Statistics
monazite grain m103
A00GG5m103.1	0.9548	0.1746	1.2319	0.1196	1389		one domain		A00GG5m103
A00GG5m103.2	1.2211	0.2175	3.6048	0.2847	1406		one domain		mean	1411.33
A00GG5m103.3	1.1308	0.1684	2.0708	0.1786	1439		one domain		stdev	25.4231
monazite grain m105									sterr	14.678
A00GG5m105.1	1.3423	0.6391	4.0563	0.3976	1365		one domain		count	3
A00GG5m105.2	1.3398	0.6777	4.3858	0.436	1392		one domain
A00GG5m105.3	1.3066	0.6962	4.1078	0.4171	1376		one domain		A00GG5m105
A00GG5m105.4	1.5128	0.3589	3.5225	0.3004	1356		one domain		mean	1372.71
A00GG5m105.5	1.1805	0.4687	4.1823	0.3657	1356		one domain		stdev	18.7306
A00GG5m105.6	1.3154	0.3895	3.6083	0.3172	1376		one domain		sterr	5.00596
A00GG5m105.7	1.5496	0.4093	4.8114	0.3895	1348		one domain		count	14
A00GG5m105.8	1.1849	0.2493	4.8759	0.3747	1408		one domain
A00GG5m105.9	1.3189	0.4105	3.8659	0.3437	1398		one domain
A00GG5m105.10	1.2844	0.5303	4.1036	0.3809	1380		one domain
A00GG5m105.11	1.1372	0.2173	2.0089	0.1779	1380		one domain
A00GG5m105.12	1.1848	0.2166	4.0074	0.296	1343		one domain
A00GG5m105.13	1.1851	0.1815	4.5204	0.3175	1333	on an inclusion
A00GG5m105.14	1.3291	0.4556	4.2306	0.368	1365		one domain
A00GG5m105.15	1.2931	0.546	4.7924	0.4265	1375		one domain
monazite grain m160
A00GG5m160.1	1.3939	0.4812	7.8857	0.6063	1373		one domain		A00GG5m160
A00GG5m160.2	1.0649	0.1415	2.3119	0.1879	1437		one domain		mean	1396
A00GG5m160.3	1.1251	0.2403	3.3497	0.2692	1386		one domain		stdev	25.2091
A00GG5m160.4	1.257	0.3689	4.8716	0.3942	1382		one domain		sterr	11.2739
A00GG5m160.5	1.2447	0.3136	4.0712	0.3358	1402		one domain		count	5
monazite grain m224
A00GG5m224.1	1.1511	0.2467	3.2385	0.2635	1386		one domain		A00GG5m224		Monazite grain m224 from sample AA00GG5 appears to be the one mention in McCoy (2001) has occurring as an inclusion within an andalusite porphyroblast and shown in Fig. 27 from the thesis (shown to the riight here).								This excerpt is frrom McCoy (2001) in relation to this figure.
A00GG5m224.2	1.398	0.4027	4.9948	0.4133	1394		one domain		mean	1417.86
A00GG5m224.3	1.2522	0.2928	2.9165	0.2705	1472		one domain		stdev	30.152
A00GG5m224.4	1.1372	0.2116	2.6846	0.2292	1438		one domain		sterr	11.3964
A00GG5m224.5	1.1979	0.3082	5.2241	0.387	1331	on an inclusion			count	7
A00GG5m224.6	1.2816	0.355	5.0806	0.4157	1419		one domain
A00GG5m224.7	1.3981	0.3006	5.2649	0.3945	1351	on an inclusion
A00GG5m224.8	1.3987	0.3415	5.6135	0.5034	1585	off edge of grain
A00GG5m224.9	1.1384	0.1813	2.6453	0.2127	1395		one domain
A00GG5m224.10	1.0915	0.1404	2.0778	0.1701	1421		one domain
Sample	Wt % Y	Wt % U	Wt % Th	Wt % Pb	Age (Ma)	Excluded data	Domain		Statistics
monazite grain m305
A00GG5m305.1	1.2915	0.4639	3.5153	0.3351	1405		core		A00GG5m305
A00GG5m305.2	1.1349	0.1779	4.2074	0.3217	1437	off edge of grain				core
A00GG5m305.3	1.2116	0.2058	5.8799	0.4061	1334		rim		mean	1396.33
A00GG5m305.4	1.2668	0.3213	7.1773	0.5128	1340		rim		stdev	14.8009
A00GG5m305.5	1.3118	0.3611	5.6903	0.4678	1451	on domain bndary			sterr	6.04244
A00GG5m305.6	1.2927	0.3079	3.2876	0.2808	1386		core		count	6
A00GG5m305.7	1.1784	0.2973	3.1867	0.2766	1409		core			rim
A00GG5m305.8	1.2175	0.3079	2.9084	0.2586	1397		core		mean	1337
A00GG5m305.9	1.2127	0.3402	3.1076	0.2812	1409		core		stdev	4.24264
A00GG5m305.10	1.266	0.4166	3.4234	0.3104	1372		core		sterr	3
A00GG5m305.11	1.2719	0.4364	3.3645	0.3258	1432	on domain bndary			count	2
AA00GG11 - Boulder Creek granodiorite with S3 SE-side up ultramylonite from Knott Creek with an S3 foliation strike,dip of 056,77S and L3 trend,plunge of 85->140
Sample	Wt % Y	Wt % U	Wt % Th	Wt % Pb	Age (Ma)	Excluded data	Domain		Statistics
monazite grain m1
A00GG11m1.1	1.5621	0.4199	12.2284	0.8025	1275		rim		A00GG11m1
A00GG11m1.2	1.5905	0.4423	13.7582	0.8828	1256		rim			core
A00GG11m1.3	1.6199	0.4743	13.3198	0.8586	1248		rim		mean	1306
A00GG11m1.4	1.6204	0.4298	15.4273	0.9566	1232		rim		stdev	4.24264
A00GG11m1.5	1.0695	0.1471	7.7579	0.4962	1303		core		sterr	3
A00GG11m1.6	1.5867	0.4354	15.4075	0.947	1220	overlap with .4			count	2
A00GG11m1.7	1.2309	0.2779	11.4629	0.6946	1218	off edge of grain				rim
A00GG11m1.8	1.1374	0.1176	6.5613	0.4204	1309		core		mean	1252.75
monazite grain m2									stdev	17.8769
A00GG11m2.1	1.1738	0.1166	6.9588	0.4525	1332		one domain		sterr	8.93845
A00GG11m2.2	1.1385	0.1195	6.4947	0.4259	1336		one domain		count	4
A00GG11m2.3	1.1776	0.1203	5.5861	0.3808	1372		one domain
A00GG11m2.4	1.1128	0.1022	5.5271	0.3655	1346		one domain		A00GG11m2
A00GG11m2.5	1.171	0.1481	7.316	0.4901	1356		one domain		mean	1355
A00GG11m2.6	1.1141	0.1366	6.4781	0.4386	1366		one domain		stdev	15.4704
A00GG11m2.7	1.1809	0.1588	6.8172	0.4665	1367		one domain		sterr	4.89217
A00GG11m2.8	1.0841	0.1328	6.7279	0.4452	1343		one domain		count	10
A00GG11m2.9	1.1302	0.1372	7.3284	0.4962	1377		one domain
A00GG11m2.10	1.162	0.1205	6.1366	0.4097	1355		one domain
monazite grain m1
A00GG11m52.1	1.5703	0.4346	10.5725	0.7323	1315		one domain		A00GG11m52
A00GG11m52.2	1.6129	0.426	9.9557	0.692	1313		one domain		mean	1303.83
A00GG11m52.3	1.6231	0.4057	11.6057	0.7765	1296		one domain		stdev	12.123
A00GG11m52.4	1.6497	0.4373	10.2347	0.7131	1316		one domain		sterr	4.94919
A00GG11m52.5	1.5817	0.4359	10.8321	0.7327	1289		one domain		count	6
A00GG11m52.6	1.0197	0.1848	9.5215	0.6046	1294		one domain
A00GG11m52.7	1.3276	0.3089	10.1133	0.6472	1259	on inclusion
