# Supplementary material for: Virtual mapping and analytical data integration: A teaching module using Precambrian crystalline basement in Colorado's Front Range (USA)
Source: Copernicus journal article supplement (doi:10.5194/gc-2021-9), 2021-05-05
Supplement: Supplementary file 127 [file PremoandFanning2000data.xlsx]

## Sheet: Table 1
Grains/Spots	Core or Rim	U (ppm)	Th (ppm)	Th/U	204Pb* (ppb)	206Pb/238U#	206Pb/238U 1 sig	207Pb/235U#	207Pb/235U 1 sig	207Pb/206Pb#	207Pb/206Pb 1 sig	207Pb/206Pb Age Ma	207Pb/206Pb Age Ma 1 sig	% Discordant
1.1	core	1017	5770	5.67	651	0.10655	0.00221	1.65274	0.05649	0.1125	0.00278	1840	45	64
1.2	rim	509	277	0.54	40	0.25801	0.00556	3.77261	0.09169	0.10605	0.00094	1733	16	15
2.1	core	821	306	0.37	236	0.22816	0.00468	3.16567	0.08359	0.10063	0.00143	1636	27	19
3.1	core	2278	172	0.08	60	0.17559	0.00356	2.50157	0.05245	0.10333	0.00035	1685	6	38
4.1	core	1757	157	0.09	41	0.13371	0.00272	1.81308	0.03862	0.09835	0.00042	1593	8	49
5.1	rim	1337	1805	1.35	152	0.1661	0.00338	2.35717	0.05177	0.10292	0.00062	1678	11	41
6.1	core	774	1108	1.43	121	0.21822	0.00449	3.21086	0.07344	0.10671	0.00083	1744	14	27
7.1	core	1037	806	0.78	170	0.18339	0.00381	2.67464	0.06645	0.10578	0.00119	1728	21	37
8.1	core	1469	78	0.05	63	0.11228	0.0023	1.4939	0.03283	0.0965	0.00056	1057	11	56
9.1	core	533	25	0.05	74	0.29807	0.00619	4.39628	0.09771	0.10697	0.00061	1748	10	4
10.1	rim	380	49	0.13	9	0.27517	0.00576	3.76153	0.08257	0.09914	0.00044	1608	8	3
11.1	rim	585	6251	10.69	694	0.29246	0.00607	4.46654	0.13996	0.11076	0.00233	1812	39	9
12.1	core	1111	7953	7.16	314	0.23533	0.00498	3.4638	0.08678	0.10675	0.00118	1745	20	22
13.1	rim	321	4	0.01	2	0.30095	0.00638	4.37072	0.09695	0.10533	0.00047	1720	8	1
13.2	rim	516	4203	8.14	185	0.2078	0.00432	3.0205	0.079	0.10542	0.00142	1722	25	29
14.1	rim	366	1205	3.3	103	0.24364	0.00534	3.62027	0.10131	0.10777	0.0016	1762	27	20
15.1	core	1030	3010	2.92	202	0.24318	0.00518	3.60276	0.08475	0.10745	0.00082	1757	14	20
16.1	core	198	219	1.1	9	0.28858	0.00623	4.22839	0.10084	0.10627	0.00083	1736	14	6
17.1	core	655	1785	2.73	91	0.25891	0.00532	3.81579	0.08749	0.10689	0.00085	1747	15	15
17.2	rim	255	225	0.88	10	0.28383	0.00751	4.11325	0.11863	0.10511	0.0009	1716	16	6
18.1	core	1321	417	0.32	103	0.2231	0.00452	3.17739	0.06821	0.10329	0.00052	1684	9	23
19.1	core	3289	294	0.09	223	0.23555	0.00476	3.35228	0.06951	0.10322	0.00028	1683	5	19
20.1	core	1970	2005	1.02	422	0.14096	0.00285	1.99874	0.04667	0.10284	0.00097	1676	17	49
21.1	core	2100	194	0.09	122	0.3188	0.01456	4.72505	0.23796	0.10749	0.00175	1757	30	-2
22.1	rim	3706	896	0.24	63	0.23805	0.0048	3.42656	0.07018	0.1044	0.0002	1704	4	19
22.2	core	3065	569	0.19	541	0.29321	0.00593	4.29315	0.08981	0.10619	0.00036	1735	6	4
22.3	rim	4870	2255	0.46	177	0.14535	0.00293	2.06626	0.04279	0.1031	0.00029	1681	5	48
23.1	rim	1360	529	0.39	98	0.15985	0.0033	2.28041	0.05036	0.10347	0.00059	1687	11	43
23.2	core	1520	229	0.15	18	0.29263	0.00624	4.22445	0.09173	0.1047	0.00023	1709	4	3
24.1	core	3059	474	0.16	142	0.15827	0.00532	2.23304	0.14925	0.10233	0.0055	1667	103	43
25.1	core	704	1742	2.47	262	0.21477	0.0045	3.2829	0.08255	0.11086	0.00128	1814	21	31
26.1	core	736	2763	3.75	145	0.23003	0.00474	3.50317	0.08343	0.11045	0.00107	1807	18	26

## Sheet: Table 2
Grains/Spots	U (ppm)	Th (ppm)	Th/U	204Pb* (ppb)	206Pb/238U#	206Pb/238U 1 sig	207Pb/235U#	207Pb/235U 1 sig	207Pb/206Pb#	207Pb/206Pb 1 sig	207Pb/206Pb Age Ma	207Pb/206Pb Age Ma 1 sig	% Discordant
1.1	369	135	0.37	2	0.2731	0.0057	3.9535	0.08777	0.10499	0.00057	1714	10	9
2.1	637	443	0.7	38	0.24251	0.00506	3.38168	0.08031	0.10113	0.00091	1645	17	15
4.1	473	127	0.27	2	0.29544	0.00635	4.28189	0.09871	0.10511	0.00064	1716	11	3
5.1	850	158	0.19	1	0.29158	0.00718	4.18253	0.10592	0.10404	0.00037	1697	7	3
5.2	202	40	0.2	3	0.29439	0.0094	4.15098	0.14729	0.10226	0.00123	1666	22	0
6.1	712	227	0.32	6	0.27993	0.01018	4.04198	0.14964	0.10472	0.00039	1709	7	7
6.2	645	262	0.41	3	0.28904	0.00681	4.18632	0.10192	0.10504	0.00041	1715	7	5
7.1	346	304	0.88	2	0.28965	0.00963	4.15938	0.14322	0.10415	0.00059	1699	10	3
8.1	304	75	0.25	0	0.29049	0.00821	4.21543	0.12362	0.10525	0.00053	1719	9	4
9.1	869	407	0.47	34	0.26167	0.00603	3.75767	0.09017	0.10415	0.00046	1699	8	12
10.1	332	90	0.27	22	0.3025	0.0067	4.39632	0.10835	0.1054	0.00088	1721	15	1
11.1	1644	1640	1	-12	0.4932	0.01803	13.4331	0.52216	0.19754	0.00186	2806	16	8
12.1	98940	25875	0.26	-551	0.27999	0.01001	4.03334	0.14794	0.10448	0.00051	1705	9	7
12.2	341	64	0.19	-1	0.30111	0.00641	4.35527	0.09816	0.1049	0.00055	1713	10	1
11.2	2972	1689	0.57	17	0.7452	0.07488	42.3145	5.6975	0.41183	0.0321	3953	122	9
13.1	162	73	0.45	2	0.28705	0.00884	4.09807	0.13243	0.10354	0.00069	1689	12	4
13.2	1202	274	0.23	352	0.27209	0.0082	3.90048	0.12696	0.10397	0.00094	1696	17	8
14.1	487	155	0.32	1	0.30087	0.00638	4.33311	0.09709	0.10445	0.00053	1705	9	0
15.1	2339	494	0.21	553	0.21592	0.00774	2.9469	0.11321	0.09899	0.00099	1605	19	21
16.1	296	71	0.24	0	0.29619	0.00642	4.28129	0.09902	0.10483	0.00061	1711	11	2
17.1	690	214	0.31	6	0.29311	0.00726	4.241	0.1086	0.10494	0.00042	1713	7	3
17.2	748	264	0.35	5	0.29013	0.00718	4.19428	0.10666	0.10485	0.00037	1712	6	4
18.1	662	788	1.19	0	0.27802	0.00698	4.05717	0.10448	0.10584	0.00036	1729	6	8
19.1	859	383	0.45	2	0.27487	0.00669	3.93634	0.10184	0.10386	0.00065	1694	12	8
20.1	373	339	0.91	0	0.27624	0.00723	4.021	0.11491	0.10557	0.00091	1724	16	9
21.1	1113	728	0.65	332	0.19502	0.0709	2.48465	1.25351	0.0924	0.02839	1476	734	12
21.2	889	292	0.33	115	0.20399	0.00933	2.89728	0.1378	0.10301	0.00087	1679	16	29
22.1	493	100	0.2	8	0.27613	0.00858	3.95908	0.12616	0.10399	0.00043	1696	8	7
23.1	519	453	0.87	2	0.26568	0.00882	3.82362	0.1364	0.10438	0.00099	1703	18	11
24.1	427	351	0.82	1	0.27401	0.00638	3.9402	0.09481	0.10429	0.0004	1702	7	8
25.1	150	31	0.2	0	0.27841	0.00828	4.05139	0.12797	0.10554	0.0008	1724	14	8

## Sheet: Table 3
Grains/Spots	U (ppm)	Th (ppm)	Th/U	204Pb* (ppb)	206Pb/238U#	206Pb/238U 1 sig	207Pb/235U#	207Pb/235U 1 sig	207Pb/206Pb#	207Pb/206Pb 1 sig	207Pb/206Pb Age Ma	207Pb/206Pb Age Ma 1 sig	% Discordant
1.1	648	389	0.6	6	0.24401	0.01009	3.50975	0.16053	0.10432	0.00157	1702	28	17
2.1	655	343	0.52	24	0.21952	0.00536	3.141	0.08071	0.10378	0.00058	1693	10	24
3.1	398	239	0.6	7	0.26013	0.00736	3.74318	0.1101	0.10436	0.00055	1703	10	12
4.1	555	261	0.47	-2	0.26685	0.00729	3.87774	0.10858	0.10539	0.00038	1721	7	11
5.1	552	229	0.41	8	0.25793	0.00672	3.73662	0.10367	0.10507	0.00071	1716	13	14
6.1	201	66	0.33	2	0.26375	0.00645	3.78357	0.10386	0.10404	0.000102	1697	18	11
7.1	358	154	0.43	15	0.23481	0.01398	3.42512	0.2354	0.10579	0.00293	1728	52	21
8.1	317	125	0.39	273	0.29072	0.01507	3.4.27809	0.96016	0.10673	0.02262	1744	449	6
9.1	747	330	0.44	2	0.27484	0.00571	3.96818	0.08454	0.10471	0.0003	1709	5	8
10.1	487	115	0.24	10	0.24144	0.00594	3.46635	0.08949	0.10413	0.00055	1699	10	18
11.1	1102	544	0.49	108	0.12666	0.00441	1.73019	0.07003	0.09907	0.00166	1607	32	52
12.1	455	311	0.68	1	0.27885	0.00644	4.03555	0.0969	0.10496	0.00045	1714	8	7
